# Supplementary material
Source: publisher figshare collection journal article supplement (https://acs.figshare.com/ndownloader/files/8412416)
Supplement: Supplementary file 1 [file 8412416]

data_global
_audit_creation_date                               2015-10-16
_audit_creation_method                            'by CrystalStructure 4.1'
_audit_update_record                               ?

#==============================================================================
# PROCESSING SUMMARY (IUCr Office Use Only)

_journal_date_recd_electronic                      ?
_journal_date_from_coeditor                        ?
_journal_date_accepted                             ?
_journal_coeditor_code                             ?

#==============================================================================
# SUBMISSION DETAILS

_publ_contact_author_name                         'ENTER NAME'
_publ_contact_author_email                        'ENTER EMAIL ADDRESS'
_publ_contact_author_fax                          'ENTER FAX NUMBER'
_publ_contact_author_phone                        'ENTER PHONE NUMBER'
_publ_contact_letter
;
    ENTER TEXT OF LETTER
;
_publ_requested_journal                           'ENTER JOURNAL NAME HERE'
_publ_requested_category
                                               'CHOOSE FI FM FO CI CM CO or AD'
_publ_requested_coeditor_name                      ?

#==============================================================================
# TITLE AND AUTHOR LIST

_publ_section_title
;
    ENTER SECTION TITLE
;
_publ_section_title_footnote
;
    ENTER FOOTNOTE TO TITLE OF PAPER
;
loop_
_publ_author_name
_publ_author_footnote
_publ_author_address
' FIRST AUTHORS NAME '
;
  FIRST AUTHORS FOOTNOTES
;
;
  FIRST AUTHORS ADDRESS
;
_publ_section_synopsis
;
    ENTER SYNOPSIS
;

#==============================================================================
# TEXT

_publ_section_abstract
;
    ENTER ABSTRACT
;
_publ_section_comment
;
    ENTER TEXT
;
_publ_section_references
;
    ENTER OTHER REFERENCES

    Rigaku (2014). CrystalStructure. Version 4.1. 
    Rigaku Corporation, Tokyo, Japan.

    Burla, M. C., Caliandro, R., Camalli, M., Carrozzini, B., 
    Cascarano, G. L., De Caro, L., Giacovazzo, C., Polidori, G. and Spagna R.
    (2005). J. Appl. Cryst. 38, 381-388.
    SIR2004

    Rigaku (1998). REQAB. 
    Rigaku Corporation, Tokyo, Japan.

;
_publ_section_figure_captions
;
    ENTER FIGURE CAPTIONS
;
_publ_section_exptl_prep
;
    ENTER COMPOUND PREPARATION DETAILS
;
_publ_section_exptl_refinement
;
    ENTER SPECIAL DETAILS OF THE REFINEMENT
;

#==============================================================================
data_Ohtani3

#==============================================================================
# CHEMICAL DATA

_chemical_formula_sum                             'C38 H28 Mn3 N10 O5'
_chemical_formula_moiety                          'C38 H28 Mn3 N10 O5'
_chemical_formula_weight                           869.52
_chemical_melting_point                            ?

#==============================================================================
# CRYSTAL DATA
_space_group_crystal_system                        orthorhombic
_space_group_name_H-M_alt                         'P c c n'
_space_group_name_Hall                            '-P 2ab 2ac'
_space_group_IT_number                             56
loop_
_symmetry_equiv_pos_site_id
_space_group_symop_operation_xyz
1   '+X,+Y,+Z'
2   '1/2-X,+Y,1/2+Z'
3   '+X,1/2-Y,1/2+Z'
4   '1/2-X,1/2-Y,+Z'
5   '-X,-Y,-Z'
6   '1/2+X,-Y,1/2-Z'
7   '-X,1/2+Y,1/2-Z'
8   '1/2+X,1/2+Y,-Z'
#------------------------------------------------------------------------------
_cell_length_a                                     14.178(3)
_cell_length_b                                     14.470(3)
_cell_length_c                                     18.385(3)
_cell_angle_alpha                                  90.0000
_cell_angle_beta                                   90.0000
_cell_angle_gamma                                  90.0000
_cell_volume                                       3771.6(12)
_cell_formula_units_Z                              4
_cell_measurement_reflns_used                      10656
_cell_measurement_theta_min                        1.79
_cell_measurement_theta_max                        30.68
_cell_measurement_temperature                      240
#------------------------------------------------------------------------------
_exptl_crystal_description                         prism
_exptl_crystal_colour                              colorless
_exptl_crystal_size_max                            0.200
_exptl_crystal_size_mid                            0.200
_exptl_crystal_size_min                            0.200
_exptl_crystal_density_diffrn                      1.531
_exptl_crystal_density_meas                        ?
_exptl_crystal_density_method                     'not measured'
_exptl_crystal_F_000                               1764.00
_exptl_absorpt_coefficient_mu                      1.047
_exptl_absorpt_correction_type                     multi-scan
_exptl_absorpt_process_details                    'REQAB (Rigaku, 1998)'
_exptl_absorpt_correction_T_min                    0.589
_exptl_absorpt_correction_T_max                    0.811

#==============================================================================
# EXPERIMENTAL DATA

_diffrn_ambient_temperature                        240
_diffrn_radiation_type                            'Mo K\a'
_diffrn_radiation_wavelength                       0.71075
_diffrn_measurement_device_type                   'Rigaku Saturn724'
_diffrn_measurement_method                         \w
_diffrn_detector_area_resol_mean                   14.222
_diffrn_reflns_number                              14126
_diffrn_reflns_av_R_equivalents                    0.0560
_diffrn_reflns_theta_max                           27.479
_diffrn_reflns_theta_min                           3.350
_diffrn_reflns_theta_full                          25.242
_diffrn_measured_fraction_theta_max                0.994
_diffrn_measured_fraction_theta_full               0.996
_diffrn_reflns_Laue_measured_fraction_max          0.994
_diffrn_reflns_Laue_measured_fraction_full         0.996
_diffrn_reflns_point_group_measured_fraction_max   0.994
_diffrn_reflns_point_group_measured_fraction_full  0.996
_diffrn_reflns_limit_h_min                        -18
_diffrn_reflns_limit_h_max                         15
_diffrn_reflns_limit_k_min                        -13
_diffrn_reflns_limit_k_max                         18
_diffrn_reflns_limit_l_min                        -23
_diffrn_reflns_limit_l_max                         17
_diffrn_standards_number                           0
_diffrn_standards_interval_count                   .
_diffrn_standards_decay_%                          ?

#==============================================================================
# REFINEMENT DATA

_refine_special_details
;
    Refinement was performed using all reflections. The weighted 
    R-factor (wR) and goodness of fit (S) are based on F^2^.
    R-factor (gt) are based on F. The threshold expression of
    F^2^ > 2.0 sigma(F^2^) is used only for calculating R-factor (gt).
;
_reflns_number_total                               4302
_reflns_number_gt                                  3275
_reflns_threshold_expression                       F^2^>2.0\s(F^2^)
_refine_ls_structure_factor_coef                   Fsqd
_refine_ls_R_factor_all                            0.0977
_refine_ls_R_factor_gt                             0.0704
_refine_ls_wR_factor_ref                           0.1516
_refine_ls_wR_factor_gt                            0.1383
_refine_ls_number_restraints                       0
_refine_ls_hydrogen_treatment                      constr
_refine_ls_number_reflns                           4302
_refine_ls_number_parameters                       256
_refine_ls_goodness_of_fit_ref                     1.160
_refine_ls_weighting_scheme                        calc
_refine_ls_weighting_details
           'w = 1/[\s^2^(Fo^2^)+(0.0525P)^2^+3.1004P] where P=(Fo^2^+2Fc^2^)/3'
_atom_sites_solution_hydrogens                     geom
_atom_sites_solution_primary                       direct
_atom_sites_solution_secondary                     difmap
_refine_ls_shift/su_max                            0.001
_refine_diff_density_max                           0.47
_refine_diff_density_min                          -0.51
_refine_ls_extinction_method                       none
_refine_ls_extinction_coef                         ?

loop_
_atom_type_symbol
_atom_type_description
_atom_type_scat_dispersion_real
_atom_type_scat_dispersion_imag
_atom_type_scat_source
  'C' 'C'  0.0033 0.0016 
;
International Tables for Crystallography
(Vol. C, Tables 4.2.6.8 and 6.1.1.4)
;
  'H' 'H'  0.0000 0.0000 
;
International Tables for Crystallography
(Vol. C, Table 6.1.1.4)
;
  'N' 'N'  0.0061 0.0033 
;
International Tables for Crystallography
(Vol. C, Tables 4.2.6.8 and 6.1.1.4)
;
  'O' 'O'  0.0106 0.0060 
;
International Tables for Crystallography
(Vol. C, Tables 4.2.6.8 and 6.1.1.4)
;
  'Mn' 'Mn'  0.3368 0.7283 
;
International Tables for Crystallography
(Vol. C, Tables 4.2.6.8 and 6.1.1.4)
;

#==============================================================================
# ATOMIC COORDINATES AND THERMAL PARAMETERS

loop_
_atom_site_label
_atom_site_type_symbol
_atom_site_fract_x
_atom_site_fract_y
_atom_site_fract_z
_atom_site_U_iso_or_equiv
_atom_site_adp_type
_atom_site_occupancy
_atom_site_site_symmetry_multiplicity
_atom_site_calc_flag
_atom_site_refinement_flags
_atom_site_disorder_assembly
_atom_site_disorder_group
 Mn1 Mn 0.25 0.25 0.67155(4) 0.0249(2) Uani 1 4 d . . .
 Mn2 Mn 0.55050(4) 0.04825(4) 0.74825(3) 0.02790(19) Uani 1 8 d . . .
 O1 O 0.6430(2) 0.07540(19) 0.67727(15) 0.0364(7) Uani 1 8 d . . .
 O2 O 0.5894(2) 0.14044(18) 0.81569(15) 0.0351(7) Uani 1 8 d . . .
 O3 O 0.75 0.25 0.6938(5) 0.123(3) Uani 1 4 d . . .
 N1 N 0.4425(3) 0.1463(3) 0.6949(2) 0.0453(9) Uani 1 8 d . . .
 N2 N 0.1442(3) 0.0615(3) 0.6954(2) 0.0476(10) Uani 1 8 d . . .
 N3 N 0.25 0.25 0.5893(2) 0.0390(12) Uani 1 4 d . . .
 N4 N 0.5010(3) -0.0559(2) 0.68911(19) 0.0398(9) Uani 1 8 d . . .
 N5 N 0.4441(3) 0.0101(2) 0.81196(19) 0.0394(9) Uani 1 8 d . . .
 N6 N 0.25 0.25 0.7952(3) 0.0581(16) Uani 1 4 d . . .
 C1 C 0.3733(3) 0.1848(3) 0.6852(2) 0.0333(9) Uani 1 8 d . . .
 C2 C 0.1831(3) 0.1296(3) 0.6855(2) 0.0330(9) Uani 1 8 d . . .
 C3 C 0.6510(3) 0.0436(3) 0.6100(2) 0.0326(9) Uani 1 8 d . . .
 C4 C 0.7190(3) 0.0832(3) 0.5640(2) 0.0364(10) Uani 1 8 d . . .
 C5 C 0.7309(3) 0.0510(3) 0.4936(3) 0.0452(12) Uani 1 8 d . . .
 C6 C 0.6767(4) -0.0200(3) 0.4656(3) 0.0526(13) Uani 1 8 d . . .
 C7 C 0.6096(4) -0.0587(3) 0.5090(3) 0.0541(13) Uani 1 8 d . . .
 C8 C 0.5957(3) -0.0292(3) 0.5814(2) 0.0401(10) Uani 1 8 d . . .
 C9 C 0.5245(4) -0.0761(3) 0.6234(3) 0.0484(12) Uani 1 8 d . . .
 C10 C 0.4322(4) -0.1135(4) 0.7280(3) 0.0616(16) Uani 1 8 d . . .
 C11 C 0.3774(4) -0.0536(4) 0.7769(3) 0.0599(15) Uani 1 8 d . . .
 C12 C 0.4303(4) 0.0372(3) 0.8779(3) 0.0505(13) Uani 1 8 d . . .
 C13 C 0.4860(3) 0.1030(3) 0.9165(2) 0.0425(11) Uani 1 8 d . . .
 C14 C 0.4621(4) 0.1204(4) 0.9902(3) 0.0577(14) Uani 1 8 d . . .
 C15 C 0.5083(4) 0.1836(4) 1.0309(3) 0.0588(14) Uani 1 8 d . . .
 C16 C 0.5821(4) 0.2316(3) 0.9993(3) 0.0518(13) Uani 1 8 d . . .
 C17 C 0.6085(3) 0.2169(3) 0.9275(2) 0.0383(10) Uani 1 8 d . . .
 C18 C 0.5613(3) 0.1522(3) 0.8841(2) 0.0350(10) Uani 1 8 d . . .
 C19 C 0.25 0.25 0.8547(4) 0.0503(17) Uani 1 4 d . . .
 C20 C 0.25 0.25 0.9349(4) 0.112(4) Uani 1 4 d . . .
 H4 H 0.75683 0.13199 0.58107 0.0437 Uiso 1 8 calc R . .
 H5 H 0.77723 0.07831 0.46403 0.0543 Uiso 1 8 calc R . .
 H6 H 0.68584 -0.04098 0.41769 0.0631 Uiso 1 8 calc R . .
 H7 H 0.57164 -0.10637 0.49034 0.0649 Uiso 1 8 calc R . .
 H9 H 0.49261 -0.12546 0.60096 0.0581 Uiso 1 8 calc R . .
 H10A H 0.46498 -0.16115 0.75625 0.0739 Uiso 1 8 calc R . .
 H10B H 0.39017 -0.14408 0.69327 0.0739 Uiso 1 8 calc R . .
 H11A H 0.33015 -0.0188 0.74915 0.0719 Uiso 1 8 calc R . .
 H11B H 0.34469 -0.0908 0.81358 0.0719 Uiso 1 8 calc R . .
 H12 H 0.37876 0.01126 0.90286 0.0606 Uiso 1 8 calc R . .
 H14 H 0.41233 0.08691 1.01138 0.0693 Uiso 1 8 calc R . .
 H15 H 0.49088 0.19456 1.07947 0.0706 Uiso 1 8 calc R . .
 H16 H 0.61524 0.27541 1.02714 0.0621 Uiso 1 8 calc R . .
 H17 H 0.65879 0.25088 0.90776 0.0460 Uiso 1 8 calc R . .


loop_
_atom_site_aniso_label
_atom_site_aniso_U_11
_atom_site_aniso_U_22
_atom_site_aniso_U_33
_atom_site_aniso_U_12
_atom_site_aniso_U_13
_atom_site_aniso_U_23
 Mn1 0.0268(4) 0.0235(4) 0.0244(4) -0.0001(4) 0.0000 0.0000
 Mn2 0.0232(3) 0.0222(3) 0.0384(4) -0.0021(2) -0.0006(3) 0.0007(3)
 O1 0.0314(16) 0.0355(15) 0.0425(16) -0.0104(13) 0.0032(13) 0.0004(13)
 O2 0.0341(16) 0.0275(14) 0.0436(17) -0.0066(13) -0.0005(13) -0.0023(13)
 O3 0.115(6) 0.059(4) 0.194(8) -0.014(4) 0.0000 0.0000
 N1 0.034(2) 0.037(2) 0.065(2) 0.0057(17) -0.0112(19) 0.006(2)
 N2 0.036(2) 0.037(2) 0.071(3) -0.0024(18) 0.009(2) 0.009(2)
 N3 0.048(3) 0.039(3) 0.030(3) -0.002(3) 0.0000 0.0000
 N4 0.039(2) 0.0352(19) 0.045(2) -0.0143(17) 0.0070(17) -0.0050(17)
 N5 0.037(2) 0.037(2) 0.044(2) -0.0131(16) 0.0037(17) -0.0084(17)
 N6 0.076(5) 0.072(4) 0.027(3) 0.001(4) 0.0000 0.0000
 C1 0.035(2) 0.027(2) 0.038(2) -0.0050(18) -0.0050(18) 0.0039(18)
 C2 0.026(2) 0.031(2) 0.042(2) 0.0018(18) 0.0022(18) 0.0041(19)
 C3 0.026(2) 0.031(2) 0.040(2) 0.0023(17) 0.0041(18) 0.0045(19)
 C4 0.031(2) 0.033(2) 0.046(3) -0.0027(18) -0.0021(19) 0.005(2)
 C5 0.036(3) 0.051(3) 0.049(3) 0.003(2) 0.009(2) 0.011(2)
 C6 0.058(3) 0.056(3) 0.043(3) -0.001(3) 0.014(2) -0.008(2)
 C7 0.057(3) 0.051(3) 0.054(3) -0.014(3) 0.011(3) -0.014(2)
 C8 0.037(3) 0.038(2) 0.045(3) -0.005(2) 0.008(2) -0.006(2)
 C9 0.053(3) 0.041(3) 0.051(3) -0.020(2) 0.008(2) -0.016(2)
 C10 0.061(4) 0.056(3) 0.067(3) -0.033(3) 0.024(3) -0.022(3)
 C11 0.051(3) 0.066(3) 0.063(3) -0.035(3) 0.011(3) -0.019(3)
 C12 0.049(3) 0.051(3) 0.051(3) -0.020(2) 0.013(2) -0.007(2)
 C13 0.042(3) 0.041(2) 0.044(3) -0.010(2) 0.002(2) -0.009(2)
 C14 0.066(4) 0.059(3) 0.049(3) -0.022(3) 0.008(3) -0.011(3)
 C15 0.073(4) 0.056(3) 0.047(3) -0.003(3) -0.002(3) -0.018(3)
 C16 0.063(3) 0.035(3) 0.057(3) 0.005(2) -0.023(3) -0.016(2)
 C17 0.042(3) 0.025(2) 0.047(3) -0.0011(19) -0.013(2) 0.0014(19)
 C18 0.034(2) 0.025(2) 0.046(2) 0.0040(18) -0.0106(19) -0.0024(19)
 C19 0.056(5) 0.061(4) 0.033(4) -0.007(4) 0.0000 0.0000
 C20 0.157(11) 0.154(10) 0.024(4) -0.026(9) 0.0000 0.0000

#==============================================================================
_computing_data_collection
                                             'CrystalClear (Rigaku Inc., 2008)'
_computing_cell_refinement                         CrystalClear
_computing_data_reduction                          CrystalClear
_computing_structure_solution
                                                'SIR2004 (Burla, et al., 2005)'
_computing_structure_refinement
                                                 'SHELXL2013 (Sheldrick, 2008)'
_computing_publication_material
                                          'CrystalStructure 4.1 (Rigaku, 2014)'
_computing_molecular_graphics                     'CrystalStructure 4.1'

#==============================================================================
# MOLECULAR GEOMETRY

_geom_special_details
;
    ENTER SPECIAL DETAILS OF THE MOLECULAR GEOMETRY
;

loop_
_geom_bond_atom_site_label_1
_geom_bond_atom_site_label_2
_geom_bond_distance
_geom_bond_publ_flag
_geom_bond_site_symmetry_1
_geom_bond_site_symmetry_2
Mn1 N3 1.512(4) yes . .
Mn1 N6 2.273(6) yes . .
Mn1 C1 2.002(4) yes . .
Mn1 C1 2.002(4) yes . 4_555
Mn1 C2 2.000(4) yes . .
Mn1 C2 2.000(4) yes . 4_555
Mn2 O1 1.892(3) yes . .
Mn2 O2 1.903(3) yes . .
Mn2 N1 2.306(4) yes . .
Mn2 N2 2.315(4) yes . 6_556
Mn2 N4 1.987(3) yes . .
Mn2 N5 1.988(4) yes . .
O1 C3 1.323(5) yes . .
O2 C18 1.330(5) yes . .
N1 C1 1.142(5) yes . .
N2 C2 1.144(5) yes . .
N4 C9 1.287(6) yes . .
N4 C10 1.468(7) yes . .
N5 C11 1.470(6) yes . .
N5 C12 1.290(6) yes . .
N6 C19 1.094(9) yes . .
C3 C4 1.406(6) yes . .
C3 C8 1.415(6) yes . .
C4 C5 1.385(6) yes . .
C5 C6 1.383(7) yes . .
C6 C7 1.363(7) yes . .
C7 C8 1.411(7) yes . .
C8 C9 1.441(7) yes . .
C10 C11 1.471(8) yes . .
C12 C13 1.426(7) yes . .
C13 C14 1.420(7) yes . .
C13 C18 1.415(6) yes . .
C14 C15 1.351(7) yes . .
C15 C16 1.384(8) yes . .
C16 C17 1.387(7) yes . .
C17 C18 1.400(6) yes . .
C19 C20 1.474(10) yes . .
C4 H4 0.940 no . .
C5 H5 0.940 no . .
C6 H6 0.940 no . .
C7 H7 0.940 no . .
C9 H9 0.940 no . .
C10 H10A 0.980 no . .
C10 H10B 0.980 no . .
C11 H11A 0.980 no . .
C11 H11B 0.980 no . .
C12 H12 0.940 no . .
C14 H14 0.940 no . .
C15 H15 0.940 no . .
C16 H16 0.940 no . .
C17 H17 0.940 no . .

loop_
_geom_angle_atom_site_label_1
_geom_angle_atom_site_label_2
_geom_angle_atom_site_label_3
_geom_angle
_geom_angle_publ_flag
_geom_angle_site_symmetry_1
_geom_angle_site_symmetry_2
_geom_angle_site_symmetry_3
N3 Mn1 N6 180.000 yes . . .
N3 Mn1 C1 97.17(12) yes . . .
N3 Mn1 C1 97.17(12) yes . . 4_555
N3 Mn1 C2 97.39(12) yes . . .
N3 Mn1 C2 97.39(12) yes . . 4_555
N6 Mn1 C1 82.83(12) yes . . .
N6 Mn1 C1 82.83(12) yes . . 4_555
N6 Mn1 C2 82.61(12) yes . . .
N6 Mn1 C2 82.61(12) yes . . 4_555
C1 Mn1 C1 165.65(17) yes . . 4_555
C1 Mn1 C2 89.27(16) yes . . .
C1 Mn1 C2 88.88(16) yes . . 4_555
C1 Mn1 C2 88.88(16) yes 4_555 . .
C1 Mn1 C2 89.27(16) yes 4_555 . 4_555
C2 Mn1 C2 165.21(17) yes . . 4_555
O1 Mn2 O2 95.92(12) yes . . .
O1 Mn2 N1 92.28(13) yes . . .
O1 Mn2 N2 93.04(13) yes . . 6_556
O1 Mn2 N4 91.43(14) yes . . .
O1 Mn2 N5 172.03(14) yes . . .
O2 Mn2 N1 92.17(13) yes . . .
O2 Mn2 N2 91.33(13) yes . . 6_556
O2 Mn2 N4 172.25(13) yes . . .
O2 Mn2 N5 91.75(13) yes . . .
N1 Mn2 N2 173.30(13) yes . . 6_556
N1 Mn2 N4 89.99(14) yes . . .
N1 Mn2 N5 85.26(14) yes . . .
N2 Mn2 N4 85.82(14) yes 6_556 . .
N2 Mn2 N5 88.93(14) yes 6_556 . .
N4 Mn2 N5 81.00(15) yes . . .
Mn2 O1 C3 129.1(3) yes . . .
Mn2 O2 C18 128.3(2) yes . . .
Mn2 N1 C1 159.6(4) yes . . .
Mn2 N2 C2 159.8(4) yes 6_456 . .
Mn2 N4 C9 126.5(3) yes . . .
Mn2 N4 C10 113.5(3) yes . . .
C9 N4 C10 120.0(4) yes . . .
Mn2 N5 C11 113.8(3) yes . . .
Mn2 N5 C12 125.8(3) yes . . .
C11 N5 C12 120.4(4) yes . . .
Mn1 N6 C19 180.000 yes . . .
Mn1 C1 N1 177.8(4) yes . . .
Mn1 C2 N2 178.1(4) yes . . .
O1 C3 C4 118.7(3) yes . . .
O1 C3 C8 124.0(4) yes . . .
C4 C3 C8 117.4(4) yes . . .
C3 C4 C5 120.6(4) yes . . .
C4 C5 C6 122.1(4) yes . . .
C5 C6 C7 118.3(4) yes . . .
C6 C7 C8 121.8(5) yes . . .
C3 C8 C7 119.9(4) yes . . .
C3 C8 C9 122.7(4) yes . . .
C7 C8 C9 117.4(4) yes . . .
N4 C9 C8 125.2(4) yes . . .
N4 C10 C11 108.3(4) yes . . .
N5 C11 C10 107.3(4) yes . . .
N5 C12 C13 125.9(4) yes . . .
C12 C13 C14 117.4(4) yes . . .
C12 C13 C18 123.0(4) yes . . .
C14 C13 C18 119.6(4) yes . . .
C13 C14 C15 122.2(5) yes . . .
C14 C15 C16 118.3(5) yes . . .
C15 C16 C17 121.7(5) yes . . .
C16 C17 C18 121.1(4) yes . . .
O2 C18 C13 124.0(4) yes . . .
O2 C18 C17 118.8(4) yes . . .
C13 C18 C17 117.2(4) yes . . .
N6 C19 C20 180.000 yes . . .
C3 C4 H4 119.707 no . . .
C5 C4 H4 119.696 no . . .
C4 C5 H5 118.971 no . . .
C6 C5 H5 118.961 no . . .
C5 C6 H6 120.848 no . . .
C7 C6 H6 120.841 no . . .
C6 C7 H7 119.126 no . . .
C8 C7 H7 119.122 no . . .
N4 C9 H9 117.386 no . . .
C8 C9 H9 117.375 no . . .
N4 C10 H10A 110.030 no . . .
N4 C10 H10B 110.018 no . . .
C11 C10 H10A 110.030 no . . .
C11 C10 H10B 110.035 no . . .
H10A C10 H10B 108.392 no . . .
N5 C11 H11A 110.257 no . . .
N5 C11 H11B 110.268 no . . .
C10 C11 H11A 110.267 no . . .
C10 C11 H11B 110.267 no . . .
H11A C11 H11B 108.525 no . . .
N5 C12 H12 117.059 no . . .
C13 C12 H12 117.061 no . . .
C13 C14 H14 118.913 no . . .
C15 C14 H14 118.903 no . . .
C14 C15 H15 120.848 no . . .
C16 C15 H15 120.843 no . . .
C15 C16 H16 119.161 no . . .
C17 C16 H16 119.164 no . . .
C16 C17 H17 119.437 no . . .
C18 C17 H17 119.440 no . . .

loop_
_geom_torsion_atom_site_label_1
_geom_torsion_atom_site_label_2
_geom_torsion_atom_site_label_3
_geom_torsion_atom_site_label_4
_geom_torsion
_geom_torsion_publ_flag
_geom_torsion_site_symmetry_1
_geom_torsion_site_symmetry_2
_geom_torsion_site_symmetry_3
_geom_torsion_site_symmetry_4
O1 Mn2 O2 C18 -170.1(2) no . . . .
O2 Mn2 O1 C3 -171.2(2) no . . . .
O1 Mn2 N1 C1 178.2(8) no . . . .
N1 Mn2 O1 C3 -78.7(2) no . . . .
O1 Mn2 N2 C2 -73.8(8) no . . 6_556 6_556
N2 Mn2 O1 C3 97.2(2) no 6_556 . . .
O1 Mn2 N4 C9 -8.5(3) no . . . .
O1 Mn2 N4 C10 170.5(2) no . . . .
N4 Mn2 O1 C3 11.3(2) no . . . .
O2 Mn2 N1 C1 -85.8(8) no . . . .
N1 Mn2 O2 C18 97.4(2) no . . . .
O2 Mn2 N2 C2 -169.8(8) no . . 6_556 6_556
N2 Mn2 O2 C18 -76.9(2) no 6_556 . . .
O2 Mn2 N5 C11 169.7(2) no . . . .
O2 Mn2 N5 C12 -9.4(3) no . . . .
N5 Mn2 O2 C18 12.1(2) no . . . .
N1 Mn2 N4 C9 83.8(3) no . . . .
N1 Mn2 N4 C10 -97.2(2) no . . . .
N4 Mn2 N1 C1 86.8(8) no . . . .
N1 Mn2 N5 C11 77.6(2) no . . . .
N1 Mn2 N5 C12 -101.4(3) no . . . .
N5 Mn2 N1 C1 5.8(8) no . . . .
N2 Mn2 N4 C9 -101.5(3) no 6_556 . . .
N2 Mn2 N4 C10 77.6(2) no 6_556 . . .
N4 Mn2 N2 C2 17.4(8) no . . 6_556 6_556
N2 Mn2 N5 C11 -99.0(2) no 6_556 . . .
N2 Mn2 N5 C12 81.9(3) no 6_556 . . .
N5 Mn2 N2 C2 98.5(8) no . . 6_556 6_556
N4 Mn2 N5 C11 -13.1(2) no . . . .
N4 Mn2 N5 C12 167.9(3) no . . . .
N5 Mn2 N4 C9 169.0(3) no . . . .
N5 Mn2 N4 C10 -12.0(2) no . . . .
Mn2 O1 C3 C4 171.7(2) no . . . .
Mn2 O1 C3 C8 -9.1(5) no . . . .
Mn2 O2 C18 C13 -8.7(5) no . . . .
Mn2 O2 C18 C17 171.3(2) no . . . .
Mn2 N4 C9 C8 3.6(6) no . . . .
Mn2 N4 C10 C11 34.3(4) no . . . .
C9 N4 C10 C11 -146.6(4) no . . . .
C10 N4 C9 C8 -175.4(4) no . . . .
Mn2 N5 C11 C10 34.8(4) no . . . .
Mn2 N5 C12 C13 3.2(7) no . . . .
C11 N5 C12 C13 -175.8(4) no . . . .
C12 N5 C11 C10 -146.1(4) no . . . .
O1 C3 C4 C5 178.9(3) no . . . .
O1 C3 C8 C7 -179.7(3) no . . . .
O1 C3 C8 C9 0.0(6) no . . . .
C4 C3 C8 C7 -0.5(6) no . . . .
C4 C3 C8 C9 179.3(3) no . . . .
C8 C3 C4 C5 -0.4(6) no . . . .
C3 C4 C5 C6 0.6(6) no . . . .
C4 C5 C6 C7 0.1(7) no . . . .
C5 C6 C7 C8 -1.0(7) no . . . .
C6 C7 C8 C3 1.2(7) no . . . .
C6 C7 C8 C9 -178.6(4) no . . . .
C3 C8 C9 N4 2.5(7) no . . . .
C7 C8 C9 N4 -177.7(4) no . . . .
N4 C10 C11 N5 -43.1(5) no . . . .
N5 C12 C13 C14 -177.0(4) no . . . .
N5 C12 C13 C18 4.6(7) no . . . .
C12 C13 C14 C15 -177.8(4) no . . . .
C12 C13 C18 O2 -1.9(7) no . . . .
C12 C13 C18 C17 178.1(4) no . . . .
C14 C13 C18 O2 179.6(4) no . . . .
C14 C13 C18 C17 -0.3(6) no . . . .
C18 C13 C14 C15 0.7(7) no . . . .
C13 C14 C15 C16 -0.7(8) no . . . .
C14 C15 C16 C17 0.5(8) no . . . .
C15 C16 C17 C18 -0.2(7) no . . . .
C16 C17 C18 O2 -179.9(4) no . . . .
C16 C17 C18 C13 0.1(6) no . . . .

loop_
_geom_contact_atom_site_label_1
_geom_contact_atom_site_label_2
_geom_contact_distance
_geom_contact_publ_flag
_geom_contact_site_symmetry_1
_geom_contact_site_symmetry_2
Mn1 N1 3.144(4) no . 4_555
Mn1 N2 3.144(4) no . 4_555
Mn2 C8 3.328(4) no . .
Mn2 C13 3.321(5) no . .
O1 C9 2.935(6) no . .
O1 C11 3.442(6) no . 6_556
O2 C12 2.938(6) no . .
N1 C11 3.389(7) no . .
N2 C10 3.403(7) no . 6_456
N4 C3 2.952(5) no . .
N5 C1 3.583(5) no . .
N5 C18 2.958(5) no . .
C3 C6 2.835(6) no . .
C4 C7 2.765(7) no . .
C5 C8 2.761(6) no . .
C7 C20 3.562(6) no . 6_556
C9 C11 3.524(7) no . .
C10 C12 3.514(7) no . .
C13 C16 2.764(7) no . .
C14 C17 2.754(7) no . .
C15 C18 2.838(7) no . .
O1 O3 2.962(3) no . .
O2 O3 3.567(6) no . .
O3 O1 2.962(3) no . .
O3 O1 2.962(3) no . 4_655
O3 O2 3.567(6) no . .
O3 O2 3.567(6) no . 4_655
O3 C4 3.422(8) no . .
O3 C4 3.422(8) no . 4_655
O3 C10 3.556(7) no . 6_556
O3 C10 3.556(7) no . 7_656
O3 C11 3.410(6) no . 6_556
O3 C11 3.410(6) no . 7_656
N3 C20 2.839(8) no . 2_554
C4 O3 3.422(8) no . .
C4 C16 3.515(6) no . 3_554
C5 C17 3.525(6) no . 2_654
C6 C9 3.569(7) no . 5_656
C7 C7 3.558(7) no . 5_656
C7 C8 3.585(7) no . 5_656
C8 C7 3.585(7) no . 5_656
C9 C6 3.569(7) no . 5_656
C10 O3 3.556(7) no . 6_456
C11 O3 3.410(6) no . 6_456
C16 C4 3.515(6) no . 3_555
C17 C5 3.525(6) no . 2_655
C20 N3 2.839(8) no . 2_555
C20 C7 3.562(6) no . 7_656
Mn2 H10A 3.2669 no . .
Mn2 H11A 3.2713 no . .
O1 H4 2.5301 no . .
O1 H11A 3.0883 no . 6_556
O1 H11B 2.8725 no . 6_556
O2 H17 2.5274 no . .
N1 H11A 3.0393 no . .
N2 H10A 3.0538 no . 6_456
N2 H11A 3.0457 no . .
N4 H11A 2.7156 no . .
N4 H11B 3.2253 no . .
N5 H10A 2.6972 no . .
N5 H10B 3.2127 no . .
C1 H11A 3.2306 no . .
C2 H10A 3.3041 no . 6_456
C2 H11A 3.2131 no . .
C3 H5 3.2650 no . .
C3 H7 3.2896 no . .
C3 H9 3.3254 no . .
C3 H11B 3.1586 no . 6_556
C3 H12 3.3335 no . 6_556
C4 H6 3.2688 no . .
C4 H11B 2.8727 no . 6_556
C4 H12 2.7145 no . 6_556
C5 H7 3.2077 no . .
C5 H12 2.9714 no . 6_556
C5 H14 3.2573 no . 6_556
C6 H4 3.2614 no . .
C6 H14 3.5044 no . 6_556
C7 H5 3.2035 no . .
C7 H9 2.5575 no . .
C8 H4 3.2648 no . .
C8 H6 3.2744 no . .
C9 H7 2.5732 no . .
C9 H10A 2.8622 no . .
C9 H10B 2.4986 no . .
C10 H9 2.4943 no . .
C11 H4 3.3209 no . 6_456
C11 H12 2.4991 no . .
C12 H4 3.5505 no . 6_456
C12 H11A 2.8770 no . .
C12 H11B 2.5104 no . .
C12 H14 2.5691 no . .
C13 H15 3.2770 no . .
C13 H17 3.2564 no . .
C14 H12 2.5430 no . .
C14 H16 3.1950 no . .
C15 H17 3.2596 no . .
C16 H14 3.1986 no . .
C17 H15 3.2688 no . .
C18 H12 3.3130 no . .
C18 H14 3.2910 no . .
C18 H16 3.2681 no . .
C20 H7 3.5500 no . 6_456
C20 H14 3.5837 no . .
C20 H14 3.5837 no . 4_555
H4 H5 2.3059 no . .
H4 H11B 2.3787 no . 6_556
H4 H12 2.7152 no . 6_556
H5 H6 2.3204 no . .
H5 H12 3.1210 no . 6_556
H5 H14 3.0965 no . 6_556
H6 H7 2.3023 no . .
H6 H14 3.5289 no . 6_556
H7 H9 2.3383 no . .
H9 H10A 2.9276 no . .
H9 H10B 2.2499 no . .
H10A H11A 2.8131 no . .
H10A H11B 2.2485 no . .
H10B H11A 2.2507 no . .
H10B H11B 2.4295 no . .
H11A H12 2.9411 no . .
H11B H12 2.2602 no . .
H12 H14 2.3249 no . .
H14 H15 2.2877 no . .
H15 H16 2.3244 no . .
H16 H17 2.3074 no . .
Mn1 H6 3.5590 no . 5_656
Mn1 H6 3.5590 no . 8_456
O1 H16 3.5262 no . 3_554
O2 H5 3.4385 no . 2_655
O2 H10A 3.2535 no . 7_656
O2 H10B 3.1357 no . 7_656
O3 H4 2.6871 no . .
O3 H4 2.6871 no . 4_655
O3 H10A 3.4331 no . 6_556
O3 H10A 3.4331 no . 7_656
O3 H10B 3.2571 no . 6_556
O3 H10B 3.2571 no . 7_656
O3 H11B 2.6697 no . 6_556
O3 H11B 2.6697 no . 7_656
N1 H6 3.1498 no . 5_656
N1 H7 3.4610 no . 5_656
N1 H10A 3.2074 no . 7_656
N1 H15 3.2062 no . 3_554
N2 H6 3.1966 no . 5_656
N2 H14 3.4964 no . 2_554
N2 H15 3.4523 no . 2_554
N3 H6 3.1609 no . 5_656
N3 H6 3.1609 no . 8_456
N3 H7 3.5857 no . 5_656
N3 H7 3.5857 no . 8_456
N3 H14 3.5941 no . 2_554
N3 H14 3.5941 no . 3_554
N3 H15 3.5127 no . 2_554
N3 H15 3.5127 no . 3_554
N4 H6 3.5831 no . 5_656
C1 H6 2.9338 no . 5_656
C1 H7 3.5081 no . 5_656
C1 H10A 3.3747 no . 7_656
C1 H15 3.0988 no . 3_554
C2 H6 2.9494 no . 5_656
C2 H14 3.5307 no . 2_554
C2 H15 3.2821 no . 2_554
C3 H16 3.0720 no . 3_554
C4 H16 2.6094 no . 3_554
C5 H16 3.0617 no . 3_554
C5 H17 3.4281 no . 3_554
C6 H9 3.4181 no . 5_656
C7 H7 3.5085 no . 5_656
C8 H7 3.3489 no . 5_656
C9 H6 3.5117 no . 5_656
C10 H17 3.4279 no . 7_646
C12 H14 3.5138 no . 5_657
C13 H5 3.4870 no . 2_655
C13 H14 3.3747 no . 5_657
C14 H12 3.5483 no . 5_657
C14 H14 3.4890 no . 5_657
C15 H4 3.5344 no . 2_655
C15 H7 3.2677 no . 7_656
C15 H12 3.4629 no . 5_657
C16 H4 3.0908 no . 2_655
C16 H4 3.5055 no . 3_555
C16 H5 3.0527 no . 2_655
C16 H7 3.2066 no . 7_656
C16 H9 2.9656 no . 7_656
C17 H5 2.6640 no . 2_655
C17 H9 2.7445 no . 7_656
C17 H10B 2.9969 no . 7_656
C17 H17 3.3524 no . 4_655
C18 H5 2.9227 no . 2_655
C18 H9 3.3185 no . 7_656
C18 H10B 3.3447 no . 7_656
C20 H7 3.5500 no . 7_656
H4 O3 2.6871 no . .
H4 C15 3.5344 no . 2_654
H4 C16 3.0908 no . 2_654
H4 C16 3.5055 no . 3_554
H4 H4 3.4206 no . 4_655
H4 H16 2.9291 no . 2_654
H4 H16 2.6092 no . 3_554
H5 O2 3.4385 no . 2_654
H5 C13 3.4870 no . 2_654
H5 C16 3.0527 no . 2_654
H5 C17 2.6640 no . 2_654
H5 C18 2.9227 no . 2_654
H5 H16 3.4357 no . 2_654
H5 H16 3.3318 no . 3_554
H5 H17 2.8510 no . 2_654
H5 H17 3.1621 no . 3_554
H6 Mn1 3.5590 no . 5_656
H6 N1 3.1498 no . 5_656
H6 N2 3.1966 no . 5_656
H6 N3 3.1609 no . 5_656
H6 N4 3.5831 no . 5_656
H6 C1 2.9338 no . 5_656
H6 C2 2.9494 no . 5_656
H6 C9 3.5117 no . 5_656
H6 H9 3.5098 no . 5_656
H6 H10B 3.5346 no . 5_656
H6 H11A 3.1950 no . 5_656
H7 N1 3.4610 no . 5_656
H7 N3 3.5857 no . 5_656
H7 C1 3.5081 no . 5_656
H7 C7 3.5085 no . 5_656
H7 C8 3.3489 no . 5_656
H7 C15 3.2677 no . 7_646
H7 C16 3.2066 no . 7_646
H7 H15 3.2757 no . 7_646
H7 H16 3.1701 no . 7_646
H9 C6 3.4181 no . 5_656
H9 C16 2.9656 no . 7_646
H9 C17 2.7445 no . 7_646
H9 C18 3.3185 no . 7_646
H9 H6 3.5098 no . 5_656
H9 H16 3.1531 no . 7_646
H9 H17 2.7991 no . 7_646
H10A O2 3.2535 no . 7_646
H10A O3 3.4331 no . 6_456
H10A N1 3.2074 no . 7_646
H10A C1 3.3747 no . 7_646
H10A H15 3.1221 no . 5_657
H10B O2 3.1357 no . 7_646
H10B O3 3.2571 no . 6_456
H10B C17 2.9969 no . 7_646
H10B C18 3.3447 no . 7_646
H10B H6 3.5346 no . 5_656
H10B H17 2.4984 no . 7_646
H11A H6 3.1950 no . 5_656
H11B O3 2.6697 no . 6_456
H11B H15 3.3993 no . 5_657
H12 C14 3.5483 no . 5_657
H12 C15 3.4629 no . 5_657
H12 H15 3.5200 no . 5_657
H14 N2 3.4964 no . 2_555
H14 N3 3.5941 no . 2_555
H14 C2 3.5307 no . 2_555
H14 C12 3.5138 no . 5_657
H14 C13 3.3747 no . 5_657
H14 C14 3.4890 no . 5_657
H14 H14 3.5610 no . 5_657
H15 N1 3.2062 no . 3_555
H15 N2 3.4523 no . 2_555
H15 N3 3.5127 no . 2_555
H15 C1 3.0988 no . 3_555
H15 C2 3.2821 no . 2_555
H15 H7 3.2757 no . 7_656
H15 H10A 3.1221 no . 5_657
H15 H11B 3.3993 no . 5_657
H15 H12 3.5200 no . 5_657
H16 O1 3.5262 no . 3_555
H16 C3 3.0720 no . 3_555
H16 C4 2.6094 no . 3_555
H16 C5 3.0617 no . 3_555
H16 H4 2.9291 no . 2_655
H16 H4 2.6092 no . 3_555
H16 H5 3.4357 no . 2_655
H16 H5 3.3318 no . 3_555
H16 H7 3.1701 no . 7_656
H16 H9 3.1531 no . 7_656
H17 C5 3.4281 no . 3_555
H17 C10 3.4279 no . 7_656
H17 C17 3.3524 no . 4_655
H17 H5 2.8510 no . 2_655
H17 H5 3.1621 no . 3_555
H17 H9 2.7991 no . 7_656
H17 H10B 2.4984 no . 7_656
H17 H17 2.5864 no . 4_655

#==============================================================================

#==============================================================================
# Additional structures and associated data_? identifiers
# should be added at this point if there is more than one 
# structure analysis in the CIF.


_shelxl_res_file
;

    shelxl.res created by SHELXL-2014/7

TITL Ohtani3
CELL  0.71075 14.17760 14.46970 18.38490 90.00000 90.00000 90.00000
ZERR  4 0.00270 0.00270 0.00330 0.00000 0.00000 0.00000
LATT 1
SYMM .50-X,    +Y, .50+Z
SYMM    +X, .50-Y, .50+Z
SYMM .50-X, .50-Y,    +Z
SFAC C H N O MN
UNIT 152 112 40 20 12
L.S. 10
FMAP 2
PLAN -25
WPDB -2
HTAB
BOND $H
CONF
LIST 4
TEMP -32.8
ACTA
SIZE 0.200 0.200 0.200
WGHT    0.052500    3.100400
FVAR       0.72500
MN1   5    0.250000    0.250000    0.671546    10.50000    0.02679    0.02346 =
         0.02443    0.00000    0.00000   -0.00014
MN2   5    0.550497    0.048254    0.748252    11.00000    0.02316    0.02218 =
         0.03835    0.00068   -0.00061   -0.00209
O1    4    0.643040    0.075404    0.677267    11.00000    0.03135    0.03549 =
         0.04251    0.00040    0.00323   -0.01037
O2    4    0.589361    0.140437    0.815688    11.00000    0.03409    0.02750 =
         0.04361   -0.00233   -0.00054   -0.00662
O3    4    0.750000    0.250000    0.693796    10.50000    0.11492    0.05899 =
         0.19436    0.00000    0.00000   -0.01364
N1    3    0.442472    0.146319    0.694945    11.00000    0.03381    0.03716 =
         0.06486    0.00624   -0.01120    0.00571
N2    3    0.144201    0.061492    0.695409    11.00000    0.03568    0.03653 =
         0.07055    0.00852    0.00930   -0.00242
N3    3    0.250000    0.250000    0.589335    10.50000    0.04780    0.03908 =
         0.03024    0.00000    0.00000   -0.00155
N4    3    0.500996   -0.055933    0.689115    11.00000    0.03899    0.03523 =
         0.04514   -0.00498    0.00696   -0.01431
N5    3    0.444093    0.010068    0.811961    11.00000    0.03734    0.03681 =
         0.04415   -0.00841    0.00372   -0.01307
N6    3    0.250000    0.250000    0.795249    10.50000    0.07582    0.07153 =
         0.02695    0.00000    0.00000    0.00077
C1    1    0.373280    0.184791    0.685149    11.00000    0.03453    0.02682 =
         0.03845    0.00394   -0.00499   -0.00497
C2    1    0.183109    0.129597    0.685550    11.00000    0.02595    0.03062 =
         0.04244    0.00408    0.00216    0.00182
C3    1    0.651021    0.043633    0.610050    11.00000    0.02639    0.03101 =
         0.04034    0.00454    0.00411    0.00229
C4    1    0.719044    0.083225    0.563977    11.00000    0.03078    0.03281 =
         0.04561    0.00536   -0.00212   -0.00270
AFIX  43
H4    2    0.756834    0.131986    0.581069    11.00000   -1.20000
AFIX   0
C5    1    0.730888    0.051037    0.493630    11.00000    0.03641    0.05071 =
         0.04858    0.01082    0.00865    0.00274
AFIX  43
H5    2    0.777234    0.078309    0.464030    11.00000   -1.20000
AFIX   0
C6    1    0.676673   -0.019973    0.465550    11.00000    0.05833    0.05649 =
         0.04291   -0.00786    0.01390   -0.00120
AFIX  43
H6    2    0.685843   -0.040977    0.417687    11.00000   -1.20000
AFIX   0
C7    1    0.609621   -0.058714    0.509042    11.00000    0.05728    0.05125 =
         0.05368   -0.01377    0.01142   -0.01419
AFIX  43
H7    2    0.571644   -0.106371    0.490343    11.00000   -1.20000
AFIX   0
C8    1    0.595689   -0.029186    0.581404    11.00000    0.03675    0.03838 =
         0.04520   -0.00557    0.00796   -0.00478
C9    1    0.524474   -0.076131    0.623383    11.00000    0.05331    0.04064 =
         0.05131   -0.01573    0.00764   -0.01963
AFIX  43
H9    2    0.492607   -0.125464    0.600962    11.00000   -1.20000
AFIX   0
C10   1    0.432232   -0.113477    0.728036    11.00000    0.06134    0.05644 =
         0.06708   -0.02163    0.02384   -0.03266
AFIX  23
H10A  2    0.464981   -0.161150    0.756246    11.00000   -1.20000
H10B  2    0.390165   -0.144084    0.693269    11.00000   -1.20000
AFIX   0
C11   1    0.377345   -0.053565    0.776868    11.00000    0.05113    0.06617 =
         0.06253   -0.01904    0.01111   -0.03450
AFIX  23
H11A  2    0.330151   -0.018803    0.749150    11.00000   -1.20000
H11B  2    0.344685   -0.090804    0.813584    11.00000   -1.20000
AFIX   0
C12   1    0.430245    0.037200    0.877937    11.00000    0.04919    0.05106 =
         0.05138   -0.00710    0.01307   -0.01997
AFIX  43
H12   2    0.378759    0.011260    0.902857    11.00000   -1.20000
AFIX   0
C13   1    0.486013    0.103005    0.916477    11.00000    0.04232    0.04069 =
         0.04438   -0.00874    0.00164   -0.00989
C14   1    0.462045    0.120420    0.990192    11.00000    0.06554    0.05870 =
         0.04895   -0.01102    0.00821   -0.02170
AFIX  43
H14   2    0.412326    0.086915    1.011376    11.00000   -1.20000
AFIX   0
C15   1    0.508339    0.183563    1.030908    11.00000    0.07325    0.05566 =
         0.04747   -0.01771   -0.00248   -0.00347
AFIX  43
H15   2    0.490880    0.194560    1.079467    11.00000   -1.20000
AFIX   0
C16   1    0.582131    0.231647    0.999292    11.00000    0.06306    0.03539 =
         0.05690   -0.01625   -0.02283    0.00503
AFIX  43
H16   2    0.615244    0.275413    1.027143    11.00000   -1.20000
AFIX   0
C17   1    0.608456    0.216880    0.927539    11.00000    0.04247    0.02521 =
         0.04735    0.00138   -0.01275   -0.00106
AFIX  43
H17   2    0.658789    0.250885    0.907756    11.00000   -1.20000
AFIX   0
C18   1    0.561321    0.152181    0.884087    11.00000    0.03437    0.02462 =
         0.04608   -0.00239   -0.01056    0.00395
C19   1    0.250000    0.250000    0.854686    10.50000    0.05635    0.06111 =
         0.03339    0.00000    0.00000   -0.00677
C20   1    0.250000    0.250000    0.934927    10.50000    0.15743    0.15402 =
         0.02417    0.00000    0.00000   -0.02639
HKLF 4
 
REM  Ohtani3
REM R1 =  0.0704 for    3275 Fo > 4sig(Fo)  and  0.0977 for all    4302 data
REM    256 parameters refined using      0 restraints
 
END  
     
WGHT      0.0522      3.1078 

REM No hydrogen bonds found for HTAB generation

REM Highest difference peak  0.471,  deepest hole -0.507,  1-sigma level  0.102
Q1    1   0.7500  0.2500  0.7657  10.50000  0.05    0.47
Q2    1   0.2547  0.0040  0.7701  11.00000  0.05    0.42
Q3    1   0.3231  0.2481  0.9447  11.00000  0.05    0.41
Q4    1   0.4280 -0.1090  0.7945  11.00000  0.05    0.41
Q5    1   0.4604  0.2444  0.7352  11.00000  0.05    0.40
Q6    1   0.4396  0.2377  0.7803  11.00000  0.05    0.36
Q7    1   0.5565  0.2005  0.7509  11.00000  0.05    0.36
Q8    1   0.3744 -0.0665  0.7077  11.00000  0.05    0.36
Q9    1   0.1966  0.1855  0.6800  11.00000  0.05    0.36
Q10   1   0.2553 -0.0460  0.6424  11.00000  0.05    0.35
Q11   1   0.3594 -0.0514  0.7027  11.00000  0.05    0.35
Q12   1   0.6041  0.0556  0.8076  11.00000  0.05    0.35
Q13   1   0.4425  0.1561  0.7510  11.00000  0.05    0.35
Q14   1   0.6978  0.0114  0.7792  11.00000  0.05    0.34
Q15   1   0.2570 -0.0101  0.7066  11.00000  0.05    0.34
Q16   1   0.4375 -0.2369  0.7210  11.00000  0.05    0.34
Q17   1   0.2481 -0.0512  0.7464  11.00000  0.05    0.33
Q18   1   0.6603 -0.0523  0.7591  11.00000  0.05    0.32
Q19   1   0.7430  0.0302  0.6935  11.00000  0.05    0.32
Q20   1   0.4453  0.2524  0.6822  11.00000  0.05    0.32
Q21   1   0.5159  0.2298  0.8256  11.00000  0.05    0.31
Q22   1   0.6886  0.0173  0.8323  11.00000  0.05    0.31
Q23   1   0.2432  0.0392  0.8102  11.00000  0.05    0.31
Q24   1   0.6982 -0.0038  0.7530  11.00000  0.05    0.31
Q25   1   0.5035 -0.2012  0.7337  11.00000  0.05    0.30
;

_shelxl_hkl_file
;
   0   0   3   17.06   14.28
   0   0  -3   25.98   14.40
   0   0  -426980.01 1849.59
   0   0   422288.89  517.82
   0   0  -5   15.13   15.11
   0   0   5   20.02   15.34
   0   0  -6 2897.91   86.91
   0   0   6 2799.40   92.09
   0   0  -7    8.96   20.75
   0   0   7   27.58   20.46
   0   0  -8 2918.43   91.12
   0   0   8 2990.12   91.56
   0   0  -9   16.82   16.13
   0   0   9   15.87   17.16
   0   0 -10 5163.98  116.73
   0   0  10 4998.62  114.03
   0   0 -11    7.99   20.79
   0   0  11   39.17   20.23
   0   0 -1215661.34 2534.98
   0   0  1215447.22  505.33
   0   0 -13   17.53   12.59
   0   0  13   21.09   18.64
   0   0 -1410437.40 2641.16
   0   0  1410180.43  560.16
   0   0  15    2.95   17.07
   0   0 -1610093.84  157.37
   0   0  16 9846.24  343.78
   0   0 -17   -6.36   23.74
   0   0  17  -14.33   20.54
   0   0 -18  388.09  141.19
   0   0 -19    8.63   22.95
   0   0 -20   46.27   30.63
   0   0 -21   94.49   40.36
   0   0 -22   71.24   52.78
   0  -1   3   24.08   17.94
   0   1  -3   19.44   11.25
   0  -1  -3   -7.76    8.56
   0   1   3    1.82    2.92
   0   1  -419842.24  476.14
   0  -1   419873.58  465.24
   0  -1  -419198.29  444.17
   0   1   419000.80  439.70
   0   1  -5    8.25   17.71
   0  -1  -5    5.60    8.42
   0  -1   5    8.54    9.35
   0   1   5    0.20   10.78
   0   1  -6 5981.75  178.15
   0  -1   6 5971.75  164.41
   0  -1  -6 6245.27  173.29
   0   1   6 5730.94  145.22
   0   1  -7    2.95   12.52
   0  -1   7   17.03   11.03
   0  -1  -7    6.97   17.71
   0   1   7   19.98   13.43
   0   1  -8 2992.90  108.91
   0  -1  -8 3356.60  111.71
   0  -1   8 3406.08  106.69
   0   1   8 2921.30  109.78
   0   1  -9   22.94   17.67
   0  -1  -9    6.17   23.92
   0  -1   9    7.81   14.43
   0   1   9   24.54   16.08
   0  -1 -10 3988.63   94.50
   0   1 -10 3950.49  106.77
   0  -1  10 3751.19   95.62
   0   1  10 3888.46   91.13
   0  -1 -11    9.29   16.44
   0   1 -11   12.57   22.76
   0  -1  11   12.54   15.17
   0   1  11  -15.41   13.92
   0   1 -12 1521.12   78.84
   0  -1 -12 1645.46   87.50
   0  -1  12 1424.97   86.73
   0   1  12 1806.26   81.79
   0   1 -13   13.61   25.37
   0  -1 -13   40.20   21.70
   0  -1  13   13.45   15.41
   0   1  13    4.90   16.59
   0   1 -14  275.73   87.03
   0  -1 -14  375.29  106.19
   0  -1  14  226.72   65.12
   0   1  14  287.46   85.24
   0   1 -15    2.75   14.97
   0  -1 -15   23.68   16.97
   0  -1  15   47.56   34.44
   0   1  15   26.57   15.67
   0  -1 -16 1595.45  139.52
   0   1 -16 1710.93   92.63
   0   1  16 1678.15   87.86
   0   1 -17   29.39   25.66
   0  -1 -17    9.74   26.87
   0   1  17   20.60   19.33
   0   1 -18   48.37   34.25
   0  -1 -18   77.13   40.84
   0   1 -19   -6.81   23.81
   0  -1 -19  -12.23   22.40
   0   1 -20   36.98   25.00
   0  -1 -20   41.02   26.69
   0   1 -21   17.39   31.04
   0   1 -23   71.60   41.61
   0  -2  -1   15.78    8.79
   0   2   1   46.14   16.78
   0   2  -1   -2.06   13.82
   0  -2   1   31.76   15.45
   0   2  -3   43.16   32.33
   0  -2   3   24.08   15.50
   0   2  -413653.72  335.96
   0  -2   413669.49  341.33
   0  -2  -413109.81  309.61
   0   2  -5   23.09   21.92
   0  -2   5   14.11   17.34
   0  -2  -5    7.15    9.95
   0   2  -615463.94  383.56
   0  -2   616028.83  387.33
   0  -2  -614721.93  345.88
   0   2  -7   -0.81   25.37
   0  -2   7   35.81   15.53
   0  -2  -7   11.36   14.04
   0   2  -816198.36  423.07
   0  -2   816771.50  414.40
   0  -2  -814748.15  355.84
   0   2   815030.63  364.37
   0   2  -9   -5.08   20.45
   0  -2  -9   28.88   18.61
   0   2   9    5.67   12.19
   0   2 -10  705.99   52.70
   0  -2  10  813.07   85.29
   0  -2 -10  719.29   63.18
   0   2  10  702.65   37.02
   0   2 -11   28.46   25.56
   0  -2 -11   38.30   23.71
   0  -2  11    4.01   22.21
   0   2  11    1.06   10.57
   0   2 -12   64.45   32.17
   0  -2 -12   86.25   20.54
   0  -2  12  112.66   25.75
   0   2  12  111.84   26.25
   0   2 -13   27.46   28.23
   0  -2 -13   -7.53   17.85
   0  -2  13   10.40   18.52
   0   2  13    8.43   12.16
   0   2 -14 1527.85   82.94
   0  -2 -14 1636.86   81.42
   0   2  14 1635.23   71.05
   0   2 -15   45.23   32.13
   0  -2 -15   17.70   16.74
   0   2  15    7.08   15.89
   0   2 -16 1871.83  102.97
   0  -2 -16 2331.03  120.63
   0   2 -17   14.42   36.69
   0  -2 -17   18.86   16.27
   0  -2 -18 1794.86  125.86
   0   2 -18 1477.51  115.80
   0   2 -19   32.25   19.31
   0  -2 -19    6.22   21.38
   0  -2 -20 1090.77   97.24
   0   2 -20  875.16   88.37
   0  -2 -21   27.11   18.36
   0   2 -21   23.93   43.39
   0   2 -22   86.49   47.13
   0   2 -23   61.42   29.79
   0   3   0  101.95   33.42
   0  -3   0    9.07   16.16
   0   3   1   12.09   14.51
   0   3  -1   40.99   28.60
   0  -3  -1   25.69   14.87
   0  -3   1   28.97   20.77
   0   3   2 1963.79   69.50
   0  -3  -2 2087.12   58.96
   0  -3   2 2244.10   78.38
   0   3  -2 2005.67   71.84
   0   3   3   11.99   13.99
   0  -3  -3    6.10    7.61
   0   3  -3   27.41   41.53
   0  -3   3   27.61   15.73
   0  -3  -4  339.68   27.95
   0   3  -4  399.51   46.77
   0  -3   4  322.20   35.20
   0   3  -5  -16.24   21.09
   0  -3   5   22.19   19.26
   0  -3  -6 2057.14   59.41
   0   3  -6 1939.39   81.98
   0  -3   6 1910.42   72.47
   0  -3  -6 1861.26   55.63
   0   3  -7   25.80   27.72
   0  -3   7   16.37   20.70
   0  -3  -7   38.08   19.82
   0   3  -8 1228.65   60.86
   0  -3   8 1266.19   62.94
   0  -3  -8 1349.57   50.77
   0   3  -9   -2.83   21.70
   0  -3   9   -9.14   20.18
   0  -3  -9   19.12   14.13
   0   3 -10  136.02   37.13
   0  -3  10  146.39   37.17
   0  -3 -10   87.73   17.57
   0   3 -11   31.92   27.08
   0  -3 -11   14.73    9.87
   0  -3  11   14.44   30.70
   0   3 -12 2295.01  132.61
   0  -3  12 2426.68  134.34
   0  -3 -12 2163.35  115.02
   0   3 -13   60.92   39.55
   0  -3 -13   20.20   18.01
   0  -3  13   20.48   25.30
   0   3 -14  907.90   69.43
   0  -3 -14  923.00   51.32
   0   3 -15   86.37   38.24
   0  -3 -15   18.50   19.67
   0   3 -16   85.47   46.51
   0  -3 -16  109.43   39.52
   0   3 -17   18.99   31.68
   0  -3 -17   39.41   19.67
   0   3 -18  172.79   62.67
   0  -3 -18  143.09   75.96
   0   3 -19    6.86   25.07
   0  -3 -19   15.97   14.95
   0   3 -20   87.50   44.83
   0   3 -21   19.79   19.33
   0   3 -22  159.70  124.68
   0   3 -23   32.40   26.13
   0   4   012656.79  305.26
   0  -4   012838.00  307.75
   0   4   1  -24.89   14.95
   0   4  -1   15.51   14.96
   0  -4   1    0.48   19.29
   0   4   2    6.65   13.69
   0  -4  -2   23.69   17.55
   0   4  -2    8.22   25.81
   0  -4   2  108.79   34.07
   0   4   3    4.17   11.91
   0  -4  -3    2.04    9.63
   0  -4   3   32.63   20.49
   0   4  -3   19.13   32.21
   0   4   4  133.12   35.96
   0  -4  -4  112.05   17.71
   0   4  -4  143.94   31.12
   0  -4   4  110.34   34.27
   0  -4  -5   -0.13    9.66
   0   4  -5   22.56   23.14
   0  -4   5   25.83   15.58
   0  -4  -6  304.41   37.23
   0   4  -6  269.92   44.18
   0  -4   6  447.95   88.39
   0   4  -7   17.98   26.68
   0  -4   7   16.42   24.58
   0  -4  -7   -6.27   10.70
   0  -4  -8  199.05   40.81
   0   4  -8  178.25   29.82
   0  -4   8  233.92   61.21
   0  -4  -8  226.78   42.32
   0  -4  -9    8.66    8.54
   0   4  -9   -4.61   25.91
   0  -4   9   42.57   40.99
   0  -4  -9   25.39   12.35
   0   4 -10 1421.42   94.23
   0  -4  10 1686.31  181.89
   0  -4 -10 1522.57   74.81
   0   4 -11   67.07   46.75
   0  -4  11   49.75   26.83
   0  -4 -11   15.45   15.07
   0   4 -12 2462.16  141.22
   0  -4  12 2537.47  139.71
   0  -4 -12 2654.64  129.42
   0   4 -13   24.01   31.78
   0  -4 -13    2.32   11.40
   0   4 -14  555.51   61.03
   0  -4 -14  518.96   85.22
   0   4 -15   18.68   29.99
   0  -4 -15   15.88   19.64
   0   4 -16   88.00   56.15
   0   4 -17  -21.15   28.49
   0  -4 -17   14.79   12.98
   0   4 -18   74.57   45.80
   0  -4 -18    4.53   13.34
   0   4 -19   20.88   30.57
   0   4 -20   -1.95   28.17
   0   4 -21   46.84   30.96
   0   4 -22  123.36   54.85
   0   5   0   28.05   19.33
   0  -5   0   28.46   23.41
   0   5   1    7.00   16.13
   0   5  -1   41.50   30.63
   0  -5  -1    9.16   13.08
   0  -5   1   31.04   27.04
   0   5   2 1962.79   69.64
   0  -5  -2 1985.22   73.67
   0   5  -2 1820.31   71.88
   0  -5   2 1983.07   69.79
   0   5   3  -11.01   13.25
   0  -5  -3   28.27   16.43
   0   5  -3    2.79   16.62
   0  -5   3   14.92   21.94
   0   5   4 3564.72   99.87
   0  -5  -4 3372.69   93.26
   0   5  -4 3207.42  117.46
   0  -5   4 3564.01  111.06
   0   5   5    6.54    7.56
   0  -5  -5   52.39   18.85
   0   5  -5   45.25   32.53
   0  -5   5   27.60   32.01
   0  -5  -6  117.99   28.94
   0   5  -6   91.90   30.60
   0  -5   6   79.23   19.85
   0  -5  -7   -2.45    8.76
   0   5  -7   59.26   39.17
   0  -5   7   49.85   28.00
   0  -5  -8   80.70   19.90
   0   5  -8  114.18   27.68
   0  -5   8   99.35   35.78
   0  -5  -8   82.97   23.89
   0  -5  -9    8.84   14.25
   0   5  -9   15.70   20.11
   0  -5   9   10.26   23.95
   0  -5  -9   -1.84    7.19
   0   5 -10  593.65   59.74
   0  -5  10  567.96   59.65
   0  -5 -10  558.73   32.72
   0   5 -11   -3.62   26.30
   0  -5  11   21.05   33.75
   0  -5 -11    7.72    8.40
   0  -5 -12   43.80   19.74
   0   5 -12   65.52   45.90
   0  -5 -12   64.27   24.80
   0  -5 -13   24.23   20.99
   0   5 -13   34.09   18.74
   0  -5 -13    4.31   11.02
   0  -5 -14 1353.75  101.79
   0   5 -14 1417.65  117.74
   0  -5 -14 1405.44   85.76
   0   5 -15   71.43   49.80
   0  -5 -15   -0.41   14.35
   0  -5 -16 3956.73  229.26
   0   5 -16 3522.99  231.94
   0  -5 -16 3840.88  222.30
   0   5 -17   66.25   41.44
   0  -5 -17   26.60   18.43
   0   5 -18   60.67   41.09
   0  -5 -18  105.33   48.21
   0   5 -19   33.48   34.76
   0   5 -20   -8.86   32.40
   0   5 -21   47.94   40.71
   0   5 -22  155.00   56.38
   0   5 -23   -1.77   34.63
   0   6   027477.08  202.24
   0  -6   026848.80  640.84
   0   6   1    3.78   17.40
   0   6  -1   10.46   21.94
   0  -6  -1  -11.13   17.45
   0  -6   1   23.53   19.74
   0   6   2  780.56   70.24
   0  -6  -2  753.16   64.88
   0   6  -2  726.32   66.37
   0  -6   2  768.89   73.70
   0   6   3  -10.31   12.83
   0   6  -3  -20.26   23.55
   0  -6  -3   13.79   12.78
   0  -6   3   24.73   23.36
   0   6   4  223.21   46.33
   0  -6  -4  340.35   36.63
   0   6  -4  301.75   96.83
   0  -6   4  272.95   54.47
   0  -6  -5    6.54    8.84
   0   6  -5   18.66   19.56
   0  -6   5   21.80   19.51
   0   6   6  408.59   22.41
   0  -6  -6  438.98   30.04
   0   6  -6  422.84   93.57
   0  -6   6  367.44   82.80
   0  -6  -7   62.72   21.52
   0   6  -7   41.95   23.82
   0  -6   7   -0.55   24.76
   0  -6  -8    2.47    6.74
   0   6  -8   45.21   29.75
   0  -6   8   34.05   24.13
   0  -6  -9    4.15    7.61
   0   6  -9   61.53   35.80
   0  -6   9   49.83   38.23
   0  -6  -9   11.14    7.67
   0  -6 -10  196.43   46.02
   0   6 -10  140.89   40.44
   0  -6 -10  158.65   38.22
   0  -6 -11    6.86   10.68
   0   6 -11   26.88   29.76
   0  -6 -11   15.34   12.02
   0  -6 -12 4476.56  251.52
   0   6 -12 3941.72  278.97
   0  -6 -12 4458.26  247.20
   0  -6 -13    5.20    6.76
   0   6 -13   16.65   24.67
   0  -6 -13   11.25   16.23
   0  -6 -14   61.85   26.97
   0   6 -14  164.60   58.93
   0  -6 -14   94.61   27.80
   0  -6 -15   42.67   23.00
   0   6 -15   41.72   34.72
   0  -6 -15   21.95   15.94
   0   6 -16  251.75   56.05
   0  -6 -16  146.67   42.94
   0   6 -17   81.30   33.35
   0  -6 -17    9.02   14.07
   0   6 -18  350.41  130.67
   0  -6 -18  157.74   70.70
   0   6 -19   45.11   35.97
   0   6 -20    9.75   26.48
   0   6 -21   87.82   36.13
   0   6 -22   10.83   38.02
   0   7   0   20.49   20.88
   0  -7   0   15.33   18.42
   0   7  -1   29.43   21.19
   0   7   1    8.82   18.69
   0  -7   1   25.17   22.84
   0  -7  -1   14.65   18.49
   0   7   2  750.33   68.10
   0  -7  -2  790.86   65.60
   0   7  -2  931.38   58.47
   0  -7   2  804.61   72.58
   0   7   3    2.35   14.36
   0  -7  -3   36.70   19.91
   0  -7   3   12.72   24.29
   0   7   4 1842.66   79.73
   0  -7  -4 1936.53   62.63
   0   7  -4 1783.30   73.70
   0  -7   4 1990.59   70.23
   0   7   5   15.97   17.41
   0  -7  -5   -6.02   10.01
   0   7  -5   11.19   23.73
   0  -7   5   26.23   27.32
   0   7   6  577.23   31.54
   0  -7  -6  575.05   30.86
   0   7  -6  584.58   39.78
   0  -7   6  418.57  110.89
   0  -7  -7    7.68    9.61
   0   7  -7   41.69   44.95
   0  -7   7   15.15   19.96
   0  -7  -8  920.39   46.59
   0   7  -8  856.41   67.13
   0  -7   8  804.78   65.67
   0  -7  -9   47.02   20.38
   0   7  -9   80.06   48.68
   0  -7 -10 4197.99  231.49
   0   7 -10 4069.89  275.45
   0  -7 -10 4429.52  244.24
   0   7 -11   51.59   41.98
   0  -7 -11    9.92   13.54
   0  -7 -12  500.72   45.47
   0   7 -12  588.20   69.25
   0  -7 -12  450.80   59.26
   0   7 -13    0.65   33.09
   0  -7 -13   30.46   15.24
   0  -7 -14   35.48   16.73
   0   7 -14   15.29   21.29
   0  -7 -14   27.71   21.63
   0  -7 -15    6.64   16.38
   0   7 -15   44.43   32.00
   0  -7 -15   21.11   10.57
   0   7 -16  152.54   72.63
   0  -7 -16  146.25   62.27
   0   7 -17   42.70   15.40
   0  -7 -17   23.06   13.25
   0   7 -18  210.90   74.01
   0   7 -19   70.90   47.60
   0   7 -20  132.15   50.42
   0   7 -21   47.65   45.76
   0   7 -22  171.16   84.58
   0   8   0  509.26   40.80
   0  -8   0  570.34   39.04
   0   8  -1    9.67   12.59
   0   8   1    1.30   17.88
   0  -8   1   22.45   18.79
   0  -8  -1   35.74   26.88
   0   8   2  853.43   58.61
   0   8  -2  838.31   61.60
   0  -8  -2  879.97   50.37
   0  -8   2  852.48   59.33
   0  -8  -3    8.83   16.32
   0  -8   3   41.28   27.49
   0   8   4 5323.20  243.18
   0   8  -4 5442.62  260.44
   0  -8  -4 5584.30  238.80
   0  -8   4 6298.50  273.35
   0   8   5   12.36   10.35
   0  -8  -5   -4.38   12.07
   0   8  -5    7.29   19.45
   0  -8   5   46.55   41.98
   0  -8  -6 5847.01  199.62
   0   8  -6 5868.81  229.03
   0  -8   6 5845.46  212.94
   0   8   7   15.82   10.21
   0   8  -7   33.97   33.14
   0  -8  -7    5.51    8.06
   0  -8  -8 6455.75  293.31
   0   8  -8 6484.32  320.41
   0   8  -9    4.61   42.52
   0  -8 -10 1393.99   59.89
   0   8 -10 1323.35  139.59
   0  -8 -11   30.54   20.25
   0   8 -11   47.76   50.01
   0  -8 -11   22.06   20.43
   0  -8 -12   20.57   19.86
   0   8 -12   -1.99   34.14
   0  -8 -12   12.45   14.95
   0  -8 -13   63.48   24.42
   0   8 -13    8.83   37.39
   0  -8 -13   13.05   15.80
   0  -8 -14  350.44   42.62
   0   8 -14  226.83  115.04
   0  -8 -14  268.79   60.29
   0   8 -15   41.24   46.04
   0  -8 -15    3.64   10.05
   0   8 -16 1192.39  126.38
   0  -8 -16 1042.25   78.44
   0   8 -17   26.43   33.87
   0   8 -18  660.43   91.65
   0   8 -20  506.76   88.23
   0   8 -21   43.63   45.54
   0   9   0   32.35   31.36
   0  -9   0   43.08   24.68
   0   9  -1   47.10   40.48
   0   9   1   20.37   26.00
   0  -9  -1    2.67   19.38
   0  -9   1   29.33   25.44
   0   9   2    0.12   18.27
   0   9  -2   26.17   16.27
   0  -9   2   70.46   22.87
   0  -9  -2   50.44   19.34
   0   9   3   27.70   23.74
   0   9  -3   22.80   32.45
   0  -9  -3    3.52   13.75
   0   9   4  216.86   64.37
   0  -9  -4  135.45   29.24
   0   9  -4  162.47   60.47
   0  -9   4  156.02   37.81
   0   9   5   17.71   15.16
   0  -9  -5    0.96    8.41
   0   9  -5   81.46   43.13
   0   9   6  144.14   43.71
   0  -9  -6  118.33   29.27
   0   9  -6  270.18   66.46
   0   9   7   29.69   12.83
   0   9  -7   48.24   29.61
   0  -9  -7    3.20    6.95
   0   9  -8  154.05   40.29
   0  -9  -8   79.13   33.84
   0   9  -9   29.66   29.35
   0  -9  -9    5.47   10.95
   0   9 -10  173.35   59.21
   0  -9 -11    2.40    9.62
   0   9 -11  135.28   48.01
   0  -9 -11   21.57   18.86
   0  -9 -12   26.14   15.21
   0   9 -12   41.08   55.39
   0  -9 -12   14.57   14.48
   0   9 -13    3.02   30.60
   0  -9 -13    3.13    8.07
   0   9 -14  348.21   70.81
   0  -9 -14  402.70   41.69
   0   9 -15  139.13   78.52
   0  -9 -15   14.81    6.62
   0   9 -16  354.73  107.23
   0   9 -17  -33.18   36.47
   0   9 -18   79.07   63.59
   0   9 -19  105.84   51.52
   0   9 -20   30.58   45.49
   0  10   031426.70 1386.11
   0 -10   031995.27  257.93
   0  10  -1   95.80   47.34
   0  10   1   28.89   33.42
   0 -10   1   97.41   37.03
   0 -10  -1    2.45   20.10
   0  10   212688.40  575.03
   0  10  -212526.69  577.38
   0 -10  -211930.21  538.85
   0  10   3   41.52   28.73
   0  10  -3   67.18   45.17
   0  10   4 1962.96  143.14
   0  10  -4 2136.36  152.18
   0  10   5    4.81   14.14
   0  10  -5    6.23   25.91
   0 -10  -5   17.43   16.04
   0  10   6   32.39   19.76
   0 -10  -6   34.18   19.13
   0  10  -6    4.38   29.37
   0  10   7   18.60   12.53
   0 -10  -7   24.06   17.79
   0  10  -7   35.95   31.05
   0  10   8 1929.19   74.57
   0  10  -8 1826.26  172.45
   0 -10  -8 2070.33   85.36
   0 -10  -9   18.28   13.44
   0  10  -9   -1.27   20.90
   0  10 -10  302.66  116.66
   0  10 -11   90.66   51.02
   0 -10 -11   65.23   26.12
   0  10 -12 2565.97  161.24
   0 -10 -12 2882.84  148.48
   0  10 -13   -4.80   30.42
   0 -10 -13   32.37   13.38
   0  10 -14 2869.28  218.73
   0 -10 -14 3167.18  209.51
   0  10 -15   23.57   29.91
   0  10 -16 1619.46  130.27
   0  10 -17   44.12   36.69
   0  10 -18   25.98   34.80
   0  10 -19   72.72   41.02
   0  10 -20  201.26   79.54
   0  11   0    1.24   22.28
   0 -11   0   46.03   33.54
   0  11   1   18.15   23.15
   0  11  -1  112.16   40.19
   0 -11  -1   59.77   29.69
   0  11   2 1721.08  114.49
   0  11  -2 1972.22  137.04
   0 -11  -2 1840.03  120.37
   0  11   3   36.52   25.09
   0  11  -3   44.07   33.00
   0 -11  -3  -10.65   18.06
   0  11   4  702.20  139.26
   0  11  -4  990.44  117.25
   0 -11  -4  923.36   57.91
   0  11   5    7.70   26.87
   0  11  -5   30.98   40.39
   0 -11  -5   26.50   18.62
   0  11   6  664.52   52.11
   0  11  -6  758.14   96.19
   0 -11  -6  609.76   62.01
   0  11   7   22.30   13.81
   0  11  -7   32.25   42.69
   0  11   8   41.16   11.81
   0 -11  -8   40.52   20.40
   0  11  -8   17.18   27.11
   0  11  -9   43.72   37.07
   0 -11  -9    5.23   11.75
   0  11 -10 2172.06  165.22
   0 -11 -10 2156.17  132.64
   0  11 -11  -24.34   35.85
   0 -11 -11    5.14    7.85
   0 -11 -12    5.45   11.71
   0  11 -13   11.88   32.30
   0  11 -14  495.60   78.95
   0  11 -15   10.11   40.79
   0  11 -16  174.84   64.02
   0  11 -17   65.99   63.82
   0  11 -18  137.02   62.23
   0  12   0  696.11   67.29
   0  12   1  118.52   55.41
   0  12  -1   48.94   35.15
   0  12   2  802.58  116.90
   0  12  -2  756.51   66.60
   0  12   3   79.70   36.47
   0  12  -3  109.89   50.02
   0 -12  -3    6.67   12.75
   0  12   4 4336.41  235.67
   0  12  -4 4145.86  235.36
   0  12   5   40.42   16.73
   0  12  -5   40.18   19.38
   0  12   6 5067.81  205.46
   0  12  -6 4457.45  225.45
   0 -12  -6 4489.26  174.95
   0  12   7   54.89   31.89
   0  12  -7   23.39   34.09
   0 -12  -7   49.48   32.27
   0  12   8 4892.42  883.54
   0  12  -8 5006.65  911.38
   0 -12  -8 4592.41  266.17
   0  12  -9   48.36   38.82
   0 -12  -9    2.41    9.43
   0  12 -10  266.13  151.79
   0  12 -11    7.64   31.78
   0  12 -12  495.79  124.75
   0  12 -13   46.24   51.67
   0  12 -14  282.34   86.24
   0  12 -15   72.39   59.19
   0  12 -16  258.02  128.73
   0  12 -17    3.64   30.39
   0  12 -18  844.71  210.48
   0  13   1    9.69   16.57
   0  13  -1   23.03   38.67
   0  13   2  415.92  127.05
   0  13  -2  526.98   66.87
   0  13   3   27.82   31.61
   0  13  -3   61.50   46.16
   0  13   4   24.57   23.14
   0  13  -4   49.93   42.95
   0  13   5   -6.20   21.51
   0  13  -5  114.54   66.85
   0  13   6   61.88   32.62
   0  13  -6   86.42   57.22
   0 -13  -6   25.02   23.14
   0  13   7   13.61   12.38
   0  13  -7   38.85   29.30
   0  13   8  980.30   75.58
   0  13  -8  878.52   94.84
   0  13  -9   -1.86   32.21
   0  13 -10  470.81   86.89
   0  13 -11  229.54   69.08
   0  13 -12  188.06   93.99
   0  13 -13   51.89   38.09
   0  13 -14   90.50   50.21
   0  13 -15   21.23   31.52
   0  13 -16   89.85   88.72
   0  13 -17   50.56   33.08
   0  14   0 1026.24   83.41
   0  14   1   53.56   29.91
   0  14  -1  117.09   50.70
   0  14   2  284.26   76.81
   0  14  -2  184.04   49.93
   0  14   3   59.03   31.42
   0  14  -3  114.19   51.68
   0  14   4  173.64   47.86
   0  14  -4  108.50   51.82
   0  14   5   13.40   13.51
   0  14  -5  148.86   58.08
   0  14   6  114.74   58.52
   0  14  -6  278.14   63.92
   0  14   7   82.33   35.97
   0  14  -7   75.14   42.01
   0  14   8  538.25   50.54
   0  14  -8  853.27  111.71
   0  14   9   26.26   19.56
   0  14 -10  363.41  144.58
   0  14 -11  105.67   75.02
   0  14 -12  799.04  114.93
   0  14 -13   -1.16   30.36
   0  14 -14  149.24  108.66
   0  14 -15   16.95   18.72
   0  15   0   22.17   18.28
   0  15   1   45.99   26.90
   0  15  -1   81.72   54.01
   0  15   2  966.56  151.25
   0  15  -2 1082.06  108.66
   0  15  -3   65.52   37.24
   0  15   4  375.27  100.50
   0  15  -4  459.16   68.71
   0  15   5   43.54   26.31
   0  15  -5   39.15   36.07
   0  15   6   73.55   41.19
   0  15  -6   48.94   41.33
   0  15  -7   34.68   34.51
   0  15   8   22.44   19.34
   0  15  -8   78.97   52.84
   0  15  -9  122.59   61.32
   0  15 -10  360.81   86.24
   0  15 -11   14.01   36.27
   0  15 -12  117.79   55.87
   0  15 -13    7.05   26.12
   0  15 -14   80.82   67.60
   0  16   0 1123.15  263.60
   0  16   1   -7.81   28.53
   0  16  -1   63.31   33.98
   0  16   2 1047.97   87.35
   0  16  -2 1014.17   90.67
   0  16   3   36.77   31.32
   0  16  -3   26.61   43.76
   0  16   4  253.55   61.86
   0  16  -4  184.91   55.36
   0  16   5   29.71   37.11
   0  16  -5   73.25   49.80
   0  16   6 1450.17  143.97
   0  16  -6 1256.85  144.05
   0  16   7    0.43   27.05
   0  16  -8  244.00   66.06
   0  16  -9   -2.60   37.63
   0  16 -10  250.71   79.91
   0  16 -11   45.54   39.78
   0  17   0   38.59   35.93
   0  17   1   20.40   38.50
   0  17  -1   41.35   31.41
   0  17  -2  491.57  145.69
   0  17   2  569.00  138.92
   0  17   3    3.90   23.35
   0  17  -3  108.80   54.53
   0  17  -4  133.01   58.87
   0  17  -5  -12.98   37.16
   0  17   6   41.56   25.73
   0  17  -6   83.22   42.15
   0  17  -7    5.42   37.91
   0  17  -8  144.32   73.54
   0  17  -9  -15.40   43.52
   0  17 -10  724.62  175.71
   0  18   0   32.10   33.53
   0  18   1   -2.89   20.62
   0  18   2  111.72   57.31
   0  18  -2   63.55   43.33
   0  18   3   57.62   32.88
   0  18  -3  -10.37   38.32
   0  18   4  879.06  200.03
   0  18  -4 1164.20  267.31
   0  18  -6 1076.43  252.23
   1   0  -3   13.06    8.81
  -1   0   3   17.82   12.66
  -1   0  -3   23.36   15.83
   1   0   3   16.44   22.82
   1   0  -410521.82  248.73
  -1   0   410067.14  238.52
   1   0   4 9860.27  237.86
   1   0  -5   20.23   19.26
  -1   0   5  -10.18   13.02
  -1   0  -5   15.79   10.51
   1   0   5   41.84   24.75
   1   0  -6 2621.31   80.70
  -1   0  -6 2366.50   89.91
  -1   0   6 2674.91  105.78
   1   0   6 2476.28   96.12
   1   0  -7   22.62   14.88
  -1   0  -7   31.75   13.34
  -1   0   7   23.21   14.34
   1   0   7   21.10   18.49
   1   0  -8 2508.42   80.54
  -1   0  -8 2484.90  144.68
  -1   0   8 2508.93   83.24
   1   0   8 2386.73   95.38
   1   0  -9   13.57   16.19
  -1   0  -9   16.53   26.85
  -1   0   9   15.35   13.89
   1   0   9   28.44   19.67
   1   0 -10 2607.67   79.74
  -1   0 -10 2849.92  110.46
  -1   0  10 2733.79   76.79
   1   0  10 2623.42   96.92
   1   0 -11   27.97   18.96
  -1   0 -11   30.88   30.15
  -1   0  11   36.53    9.81
   1   0  11   16.16   14.89
   1   0 -12 2567.91  110.19
  -1   0 -12 2495.17  128.06
  -1   0  12 2572.75  105.86
   1   0  12 2306.59  114.58
   1   0 -13   19.44   18.13
  -1   0 -13   20.79   28.34
  -1   0  13   13.11   17.16
   1   0  13    4.31   10.70
   1   0 -14  325.25   64.83
  -1   0 -14  307.04   70.71
  -1   0  14  243.28   74.44
   1   0  14  191.28   41.97
   1   0 -15   38.58   31.75
  -1   0 -15   32.87   15.46
  -1   0  15    4.98    9.97
   1   0  15   29.30   21.84
   1   0 -16  540.34   79.78
  -1   0 -16  650.36  114.67
   1   0  16  309.50  130.53
  -1   0  16  294.12  139.56
   1   0 -17   17.19   29.19
  -1   0 -17   26.10   25.56
  -1   0  17   15.39   13.90
  -1   0 -18   59.79   23.94
   1   0 -18   49.65   28.53
  -1   0 -19   40.05   26.73
  -1   0 -20   66.72   44.06
   1   0 -21   10.64   20.00
  -1   0 -22  340.41   70.38
  -1   0 -23   12.62   22.38
  -1   1  -3   29.91   13.97
  -1  -1   3    5.92   15.46
   1  -1  -3   22.51    9.24
   1   1  -3    4.32   11.33
  -1   1   3   21.68    9.81
   1  -1   3   37.16   19.76
  -1  -1  -3   34.71   18.26
  -1  -1   4 3268.28   91.95
   1  -1  -4 3043.19   75.58
  -1   1  -4 3278.10  118.17
   1   1  -4 3016.08   90.46
  -1   1   4 3174.12   78.72
   1  -1   4 3154.19   95.96
   1   1   5   14.87   15.45
  -1  -1   5   25.67   19.54
   1  -1  -5   15.11    9.03
  -1   1  -5   28.47   23.56
  -1   1   5   17.61    9.93
   1  -1   5    9.28   17.10
  -1  -1  -5   -3.44   16.17
   1   1  -5   13.85   18.47
   1  -1  -6 5435.11  139.64
  -1   1  -6 5538.52  157.47
   1   1   6 5980.97  154.34
   1   1  -6 5864.03  154.15
   1  -1   6 5312.14  144.67
   1   1   7   23.93   12.33
   1  -1  -7   11.28   12.09
  -1  -1   7   37.67   18.31
  -1   1  -7   23.48   31.14
  -1  -1  -7   68.30   29.46
  -1   1   7   44.44   14.27
   1  -1   7   42.18   16.16
   1   1  -7   23.58   18.94
   1  -1  -8 3600.69  117.35
   1   1   8 3840.24  113.24
   1   1  -8 3649.97  109.39
  -1   1   8 3465.04   97.42
   1  -1   8 3420.58  110.71
  -1  -1  -8 3825.89  130.02
   1   1   9   25.61   16.52
  -1   1  -9  -11.81   18.42
   1  -1  -9   12.36   15.56
  -1  -1   9   16.51   20.54
  -1  -1  -9   66.91   29.04
   1  -1   9   13.89   15.92
  -1   1   9   24.99   13.93
   1   1  -9   49.54   29.93
   1   1  10   74.60   19.61
   1  -1 -10   10.01   14.37
  -1   1 -10   60.10   23.44
  -1  -1  10   43.25   21.20
  -1  -1 -10   16.92   22.34
   1  -1  10   33.27   20.49
  -1   1  10   28.90    9.00
   1   1 -10   25.13   25.59
   1  -1 -11   93.36   25.00
   1   1  11   91.69   27.25
  -1   1 -11  105.96   23.17
  -1  -1  11   44.53   20.18
   1   1 -11   22.55   34.05
   1  -1  11   74.83   32.74
  -1   1  11  101.51   21.00
  -1  -1 -11  108.07   25.88
   1  -1 -12  284.19   41.22
  -1  -1  12  294.15   68.17
  -1   1 -12  382.32  109.17
   1   1  12  378.27   91.06
  -1  -1 -12  396.92   93.13
   1  -1  12  227.56   60.42
  -1   1  12  337.06   45.65
   1   1 -12  334.94   42.21
   1  -1 -13  159.94   32.28
  -1  -1  13  128.38   35.34
  -1   1 -13  132.49   49.03
   1   1  13  162.97   46.81
  -1  -1 -13  121.14   32.43
   1  -1  13   75.78   35.16
  -1   1  13   73.51   31.16
   1   1 -13  139.48   34.50
   1  -1 -14  266.08   36.75
  -1   1 -14  286.33   93.25
   1   1  14  187.50   54.72
   1   1 -14  316.16   44.06
  -1  -1 -14  270.92  107.02
  -1   1  14  214.02   50.16
   1  -1  14  171.48   67.02
   1  -1 -15  139.82   58.57
  -1  -1  15  111.55   26.93
  -1   1 -15  117.12   33.18
   1   1  15   77.37   29.47
  -1  -1 -15  180.65   44.09
   1  -1  15   86.34   32.00
  -1   1  15   97.37   41.05
   1   1 -15   99.20   42.76
   1   1  16   15.79   13.01
   1  -1 -16  127.46   36.27
  -1   1 -16   58.58   34.34
  -1  -1  16   73.21   21.74
   1   1 -16  110.58   44.02
  -1   1  16   46.63   23.56
  -1  -1 -16   70.06   35.06
  -1   1 -17  100.00   44.40
   1  -1 -17   60.69   30.31
   1   1  17   39.32   21.68
   1   1 -17   73.18   36.06
  -1  -1 -17   71.95   36.02
  -1   1  17   34.50   24.35
   1  -1 -18   40.05   24.59
  -1   1 -18   43.36   35.10
   1   1 -18   13.11   21.95
  -1  -1 -18   45.60   38.68
   1  -1 -19   19.69   29.02
  -1   1 -19   30.96   26.71
   1   1 -19   89.48   35.31
  -1  -1 -19   12.17   13.29
   1  -1 -20  104.11   54.23
   1   1 -20  105.91   42.68
  -1  -1 -20  186.00   56.09
   1   1 -21   31.19   21.23
  -1  -1 -21    9.02   28.63
  -1   1 -22   55.32   40.42
  -1  -1 -22    2.65   29.64
  -1   1 -23   47.87   37.84
   1   2   0    5.12   12.68
  -1  -2   0   31.73   22.11
  -1   2   0   13.55   11.91
   1  -2   0   -2.14   11.73
   1   2   110538.71  251.90
   1  -2  -110530.05  248.54
  -1  -2   110255.71  246.84
  -1   2  -110966.67  269.36
  -1  -2  -111128.75  264.12
  -1   2   110489.24  244.69
   1   2  -110175.04  243.93
   1  -2   111377.06  272.01
  -1  -2   215019.75  356.02
  -1   2  -215382.33  368.73
  -1  -2  -215397.66  359.15
   1  -2   215417.04  366.52
  -1   2  -3   96.98   35.97
  -1  -2   3   92.78   23.65
   1   2  -3   56.04   14.86
  -1  -2  -3   79.64   23.69
   1  -2   3   94.33   17.55
  -1  -2   4 1338.22   51.51
  -1   2  -4 1395.69   55.94
   1  -2  -4 1388.57   35.84
   1   2  -4 1356.51   57.81
   1  -2   4 1283.74   49.61
  -1  -2   5  362.19   83.06
  -1   2  -5  248.19   27.46
   1  -2  -5  258.10   21.07
   1   2  -5  299.42   37.11
   1  -2   5  294.95   33.39
  -1  -2  -5  258.43   34.36
  -1  -2   6  951.66   45.70
  -1   2  -6 1107.77  123.69
   1  -2  -6  912.59   33.29
   1   2  -6  888.74   51.52
   1  -2   6  925.12   46.08
  -1  -2  -6  906.35   36.53
  -1   2   6  858.36   28.02
  -1   2  -7  884.94   55.74
   1  -2  -7  910.56   32.71
  -1  -2   7  911.76   46.81
   1   2  -7  945.35   51.75
   1  -2   7  929.11   48.18
  -1  -2  -7 1036.58   43.16
  -1   2   7  902.21   36.66
   1  -2  -8  176.58   25.41
  -1   2  -8  246.67   63.19
  -1  -2   8  219.15   33.76
   1   2  -8  165.63   32.40
  -1  -2  -8  179.35   51.77
   1  -2   8  196.32   38.91
  -1   2   8  176.39   41.71
  -1  -2   9   37.06   25.37
  -1   2  -9   34.80   22.60
   1  -2  -9   24.25   10.09
   1   2  -9    8.44   21.00
   1  -2   9   25.13   19.87
  -1  -2  -9   25.10   17.86
  -1   2   9   28.57   12.23
  -1  -2  10 5220.28  142.72
  -1   2 -10 4821.79  122.42
   1  -2 -10 4881.20  104.19
   1   2 -10 4617.93  117.03
   1  -2  10 4811.79  125.51
  -1   2  10 4790.05   96.58
   1  -2 -11 1594.96   81.23
  -1   2 -11 1526.79  106.02
  -1  -2  11 1566.97   84.16
   1   2 -11 1588.88   91.14
  -1  -2 -11 1699.93  138.16
   1  -2  11 1591.44  162.74
  -1   2  11 1530.42   72.69
  -1  -2  12  575.63  115.96
   1  -2 -12  493.37   51.05
  -1   2 -12  510.86  141.62
   1   2 -12  481.89   49.53
  -1  -2 -12  605.67   60.03
   1  -2  12  426.14   34.87
  -1   2  12  510.48   44.93
   1  -2 -13 2178.01  129.81
  -1  -2  13 2200.56  142.30
  -1   2 -13 2161.35  138.18
  -1  -2 -13 2505.66  155.58
   1   2 -13 2266.33  145.31
   1  -2  13 2483.73  154.65
  -1   2  13 2170.14  128.30
  -1   2 -14  662.44  101.97
   1  -2 -14  763.97   50.09
  -1  -2  14  526.75   65.64
   1   2 -14  585.58  148.72
   1  -2  14  443.37  114.55
  -1  -2 -14  756.44   61.72
   1  -2 -15 1491.69   93.64
  -1  -2  15 1328.91   96.35
  -1   2 -15 1714.14  184.57
  -1  -2 -15 1575.66  110.25
   1   2 -15 1488.90  103.92
  -1   2  15 1317.42   81.40
  -1   2 -16 1452.20  167.65
   1  -2 -16 1634.88   85.73
   1   2 -16 1619.90   97.20
  -1  -2 -16 1739.73  190.01
  -1   2  16 1413.62   72.35
   1  -2 -17  724.90   63.54
  -1   2 -17  754.01  141.90
   1   2 -17  943.04   92.85
  -1  -2 -17  857.75  124.61
  -1   2  17  669.51   74.42
  -1   2 -18  654.25   77.82
   1  -2 -18  849.82   78.27
   1   2 -18  640.01  197.45
  -1  -2 -18  654.49  132.54
  -1   2 -19   88.12   39.41
   1  -2 -19  156.55   42.70
   1   2 -19  156.51   78.49
  -1  -2 -19   87.31   30.06
  -1   2 -20   71.42   42.96
  -1  -2 -20   53.30   45.37
  -1   2 -21  273.82   70.27
  -1  -2 -21  163.74   88.72
  -1   2 -22  143.59   67.51
   1   2 -22  132.44   68.30
  -1   2 -23   98.44   40.31
   1   2 -23   66.91   51.89
   1   3   024361.45 1671.35
  -1  -3   024247.80 1663.69
  -1   3   023712.71  551.32
   1  -3   024219.79 1661.86
  -1  -3   113217.92  317.65
   1   3   112375.13  304.11
   1  -3  -112413.10  291.56
  -1   3  -112708.75  309.85
  -1   3   113045.78  309.81
   1   3  -113094.67  313.65
  -1  -3  -112910.33  306.94
   1  -3   112621.01  314.83
   1   3   2 7015.52  182.03
  -1   3  -2 6895.66  186.87
   1  -3  -2 7077.79  169.17
  -1  -3   2 6993.95  181.91
  -1  -3  -2 7059.69  174.90
  -1   3   2 6819.10  163.90
   1  -3   2 7285.51  183.43
   1   3  -2 6990.03  182.58
   1   3   3 6548.07  169.86
  -1  -3   3 6518.40  168.52
   1  -3  -3 6161.26  145.76
  -1   3  -3 6361.50  167.73
  -1  -3  -3 6230.82  161.35
   1  -3   3 5982.13  159.96
   1   3  -3 6308.24  182.11
  -1  -3   4  418.87   39.41
   1  -3  -4  445.94   33.85
  -1   3  -4  444.32   47.75
   1   3  -4  379.58   38.65
  -1  -3  -4  391.73   35.01
   1  -3   4  460.70   43.56
  -1  -3   5  874.56   42.70
   1  -3  -5  919.55   34.06
   1  -3  -5  912.36   28.85
  -1   3  -5  878.62   52.86
   1   3  -5  881.23   58.04
   1  -3   5  903.93   53.89
  -1  -3  -5  828.00   62.93
  -1  -3   6   35.97   15.89
   1  -3  -6    4.08    6.89
   1  -3  -6    4.71    8.33
  -1   3  -6    0.34   22.18
   1   3  -6   15.64   25.35
   1  -3   6   27.83   20.23
  -1  -3  -6   10.08   15.75
  -1  -3  -6   27.52   18.77
   1  -3  -7  332.76   33.93
  -1   3  -7  364.65   45.34
  -1  -3   7  405.36   98.04
   1   3  -7  382.04   52.33
   1  -3   7  254.19   60.83
  -1  -3  -7  393.44   69.02
  -1  -3   8 1039.14  109.53
  -1   3  -8  724.11   63.25
   1  -3  -8  841.99   24.13
   1   3  -8  777.69   73.48
   1  -3   8  847.75   55.81
  -1  -3  -8  894.01   74.16
  -1   3  -9   54.33   16.65
   1  -3  -9   61.22   15.55
  -1  -3   9   91.41   22.68
   1   3  -9   48.07   33.68
   1  -3   9   46.39   10.69
  -1  -3  -9   16.12    6.50
  -1  -3  10 1600.05   86.16
   1  -3 -10 1524.15   69.91
  -1   3 -10 1551.41   98.73
   1   3 -10 1461.63   81.35
   1  -3  10 1545.74   83.56
  -1  -3 -10 1699.20   84.10
  -1  -3  11  199.32   61.25
  -1   3 -11  172.37   34.60
   1  -3 -11  209.10   45.49
   1   3 -11  223.36   30.03
  -1  -3 -11  212.53   59.95
   1  -3  11  241.75   39.52
  -1  -3  12 2599.51  139.82
  -1   3 -12 2684.58  154.70
   1  -3 -12 2490.54  129.46
   1   3 -12 2678.93  149.05
  -1  -3 -12 2797.75  140.84
   1  -3  12 2597.75  139.78
  -1   3 -13   96.15   44.69
   1  -3 -13   91.71   40.35
  -1  -3  13   91.48   31.34
   1   3 -13   45.19   43.07
  -1  -3 -13   73.37   30.87
   1  -3  13  113.32   31.42
   1  -3 -14  967.64   54.95
  -1  -3  14  728.72  190.15
  -1   3 -14 1013.59  134.71
  -1  -3 -14 1172.75   70.95
   1   3 -14 1098.98   75.39
  -1   3 -15  148.07   48.86
   1  -3 -15   74.66   34.79
   1   3 -15   69.13   34.52
  -1  -3 -15   83.90   33.49
  -1   3 -16   27.99   33.44
   1  -3 -16   89.15   29.79
   1   3 -16   70.56   42.26
  -1  -3 -16   38.71   17.90
   1  -3 -17   42.54   28.53
  -1   3 -17   54.43   44.79
   1   3 -17   31.37   25.60
  -1  -3 -17   -3.52   18.99
   1  -3 -18  378.75   59.20
  -1   3 -18  413.58   59.16
   1   3 -18  408.99  116.22
  -1  -3 -18  309.43   69.37
  -1   3 -19   45.30   31.14
   1   3 -19    5.03   27.26
  -1  -3 -19   44.68   22.96
  -1   3 -20  103.83   43.63
   1   3 -20   38.13   31.15
  -1  -3 -20   31.18   25.30
  -1   3 -21   13.70   26.72
   1   3 -21   39.88   31.67
  -1  -3 -21   46.83   26.20
  -1   3 -22    7.02   28.25
   1   3 -22   63.08   35.37
  -1   3 -23    1.91   30.72
   1   4   0   -7.09   18.83
  -1  -4   0    0.73   17.34
  -1   4   0   42.90   24.30
   1  -4   0   27.93   11.20
   1   4   1  526.26   36.42
  -1   4  -1  508.76   37.50
  -1  -4   1  489.12   35.07
   1  -4  -1  475.77   40.47
   1   4  -1  552.32   41.91
  -1   4   1  470.46   41.59
  -1  -4  -1  531.39   33.37
   1  -4   1  539.76   35.38
   1   4   2   87.92   38.04
  -1  -4   2   77.78   18.21
   1  -4  -2   85.05   17.73
  -1   4  -2   90.57   33.42
  -1  -4  -2   87.52   19.88
  -1   4   2   82.01   17.97
   1   4  -2   37.09   28.39
   1  -4   2  123.99   27.45
   1   4   3 2659.86   93.26
   1  -4  -3 2699.40   72.53
  -1  -4   3 2643.01   87.78
  -1   4  -3 2640.17   91.43
  -1   4   3 2743.71   75.10
  -1  -4  -3 2745.33   80.78
   1   4  -3 2501.46   89.23
   1  -4   3 2837.85   88.60
   1   4   4 2766.81   82.01
   1  -4  -4 2743.02   71.09
  -1   4  -4 2662.10   86.93
  -1  -4   4 2647.15   93.42
  -1   4   4 2750.06   72.92
  -1  -4  -4 2773.68   78.27
   1   4  -4 2618.35   89.38
   1  -4   4 2738.45   93.89
  -1   4  -510568.59  268.26
   1  -4  -510746.75  251.29
   1   4  -511322.05  287.57
  -1  -4  -510635.44  266.98
   1  -4   510253.66  266.18
  -1   4  -6   92.85   31.22
   1  -4  -6  102.14   15.12
  -1  -4   6  108.90   32.30
   1   4  -6  101.04   33.02
  -1  -4  -6   88.63   17.38
   1  -4   6   98.40   32.13
  -1   4  -7 8186.11  225.29
   1  -4  -7 8752.24  214.13
   1  -4  -7 8373.72  200.63
  -1  -4   7 8582.89  245.41
   1   4  -7 8527.96  246.38
   1  -4   7 8480.98  255.49
  -1  -4  -7 8412.63  214.69
  -1  -4   8 2593.42   81.00
  -1   4  -8 2411.82   81.99
   1  -4  -8 2534.82   55.25
   1   4  -8 2295.86   74.43
  -1  -4  -8 2446.44   65.02
   1  -4   8 2554.50   79.59
  -1  -4  -8 2520.47   65.60
  -1   4  -911358.79  466.41
   1  -4  -911873.00  469.77
   1  -4  -911768.29  467.12
  -1  -4   910918.20  481.09
   1   4  -911493.93  477.86
   1  -4   912557.41  517.87
  -1  -4  -911955.47  481.15
  -1  -4  -912032.37  495.95
   1  -4 -10 1196.21   63.46
  -1   4 -10 1103.95   73.18
   1  -4 -10 1204.57   56.45
  -1  -4  10 1193.74   78.04
   1  -4  10 1170.63   72.02
   1   4 -10 1182.80   80.74
  -1  -4 -10 1116.80   59.83
  -1   4 -11 4970.17  194.48
   1  -4 -11 5364.22  180.90
  -1  -4  11 4680.81  185.85
   1   4 -11 4905.14  190.10
   1  -4  11 5146.72  191.73
  -1  -4 -11 5460.60  191.36
  -1  -4  12   10.78   18.52
  -1   4 -12   34.32   27.33
   1  -4 -12   23.05   12.18
   1   4 -12   31.92   37.61
  -1  -4 -12    8.91   14.58
  -1   4 -13 2979.23  186.07
   1  -4 -13 3219.36  184.38
   1   4 -13 3064.01  190.93
  -1  -4 -13 3224.04  192.19
  -1   4 -14 1274.45   86.51
   1  -4 -14 1274.02   53.25
  -1  -4 -14 1281.47   64.96
  -1   4 -15 1222.71  113.21
   1  -4 -15 1114.60   66.81
   1   4 -15 1226.07  120.77
  -1  -4 -15 1160.75   81.06
  -1   4 -16  339.95  125.75
   1  -4 -16  352.88   75.46
   1   4 -16  473.55   84.82
  -1  -4 -16  395.80   73.95
  -1   4 -17  330.96   66.06
   1  -4 -17  176.22   78.68
   1   4 -17  251.58  102.54
  -1  -4 -17  211.31   78.36
  -1   4 -18   35.35   28.52
   1  -4 -18   35.35   21.93
   1   4 -18   10.23   26.72
  -1  -4 -18   10.84   20.05
   1  -4 -19  646.51   58.35
  -1   4 -19  827.36   90.08
   1   4 -19  726.27  121.50
  -1  -4 -19  604.08  119.86
  -1   4 -20   74.72   48.51
   1   4 -20  132.16   88.13
  -1  -4 -20   57.23   27.45
  -1   4 -21  197.96  149.34
   1   4 -21  266.85  116.59
  -1   4 -22  401.66   74.47
   1   4 -23   90.09  109.63
   1   5   0  161.34   28.88
  -1   5   0  102.24   19.00
  -1  -5   0  138.63   26.07
   1  -5   0  145.31   21.33
   1   5   1  512.70   34.10
   1  -5  -1  513.81   34.55
  -1  -5   1  516.81   38.28
   1   5  -1  545.22   44.52
  -1   5   1  467.32   42.76
  -1  -5  -1  502.66   32.58
   1  -5   1  483.59   43.57
   1   5   2  133.62   35.06
  -1  -5   2  113.23   27.58
   1  -5  -2  115.89   19.45
  -1   5  -2  132.99   31.57
  -1   5   2  131.40   28.82
  -1  -5  -2   94.34   22.77
   1   5  -2  170.62   30.51
   1  -5   2  133.57   28.98
   1   5   3  443.70   62.76
  -1  -5   3  450.07   48.87
   1  -5  -3  379.12   32.32
  -1   5  -3  350.77   39.06
  -1  -5  -3  440.87   45.22
   1   5  -3  392.70   46.03
   1  -5   3  479.89  105.24
  -1  -5   4 6829.26  185.85
   1  -5  -4 6732.14  168.25
  -1  -5  -4 6799.91  175.79
  -1   5   4 6515.87  165.84
   1   5   5  158.51   18.50
  -1  -5   5  316.85   49.24
   1  -5  -5  238.76   26.22
  -1   5  -5  191.23   30.12
   1   5  -5  285.20   45.76
  -1  -5  -5  231.56   33.63
   1  -5   5  126.88   28.07
  -1   5  -6 2429.39  100.73
   1  -5  -6 2201.34   64.36
  -1  -5   6 2515.57  100.62
   1   5  -6 2414.91  100.87
  -1  -5  -6 2187.21   76.75
   1  -5   6 2215.61   90.48
  -1   5  -7  149.91   30.45
   1  -5  -7   93.64   13.07
  -1  -5   7  114.55   23.11
   1   5  -7  120.74   24.15
  -1  -5  -7  125.16   26.51
   1  -5   7   54.89   28.24
  -1   5  -8 2911.88   99.03
   1  -5  -8 3124.20   63.91
   1  -5  -8 2827.39   61.35
  -1  -5   8 3148.20   92.94
   1   5  -8 3145.47  119.95
   1  -5   8 3053.22   98.52
  -1  -5  -8 2803.19   86.51
   1  -5  -9   58.93   12.04
  -1   5  -9   32.09   29.79
  -1  -5   9   14.61   17.10
   1  -5  -9   16.65   10.28
   1   5  -9   49.42   35.27
   1  -5   9   29.68   24.70
  -1  -5  -9   30.93   14.30
  -1   5 -10   47.40   29.39
   1  -5 -10   51.46   14.37
   1  -5 -10   68.35   24.80
  -1  -5  10   48.18   34.36
   1   5 -10   75.16   30.83
   1  -5  10   30.26   20.47
  -1  -5 -10   54.30   17.93
  -1  -5 -10   99.02   19.14
  -1  -5  11  183.33   56.16
   1  -5 -11  224.23   31.50
  -1   5 -11  132.28   41.86
  -1  -5 -11  185.58   77.78
   1   5 -11  259.94   44.41
  -1  -5 -11  219.55   36.22
  -1   5 -12   44.18   30.34
   1  -5 -12   13.64   12.57
   1   5 -12    7.82   26.90
  -1  -5 -12   28.58   13.87
   1  -5 -13   57.03   24.20
  -1   5 -13   92.29   52.66
   1   5 -13  128.56   44.94
  -1  -5 -13   49.85   20.69
   1  -5 -14   -1.14    7.40
   1  -5 -14   14.13    8.89
  -1   5 -14    7.21   30.40
   1   5 -14   27.48   10.57
  -1  -5 -14   15.47   12.80
   1  -5 -15    0.35   10.60
   1  -5 -15  -11.60   10.07
  -1   5 -15   -0.07   33.89
   1   5 -15   10.18   30.46
  -1  -5 -15   19.82   18.75
  -1  -5 -15   -2.38   19.47
   1  -5 -16  408.05   71.38
  -1   5 -16  506.59   72.75
   1  -5 -16  416.90   82.10
   1   5 -16  459.45  157.19
  -1  -5 -16  412.95   58.30
  -1  -5 -16  472.64   75.72
   1  -5 -17   82.53   38.01
  -1   5 -17   85.32   42.36
   1   5 -17   60.74   41.43
  -1  -5 -17   82.86   31.86
   1  -5 -18  113.02   26.90
  -1   5 -18   35.24   41.50
   1   5 -18  131.28   64.31
  -1  -5 -18   99.18   44.96
  -1   5 -19  -29.10   30.35
  -1  -5 -19    1.49   23.27
  -1   5 -20  408.13   90.58
   1   5 -20  254.26   90.95
  -1   5 -21    9.84   29.28
   1   5 -21   54.80   45.48
  -1   5 -22   -1.02   30.78
   1   5 -22   30.77   22.99
   1   6   0   58.00   37.17
  -1  -6   0    4.56   16.43
  -1   6   0   -8.04   19.67
   1  -6   0   32.21   21.77
   1   6   1 3830.54  118.25
  -1  -6   1 3613.38  117.29
  -1   6  -1 3779.42  119.79
   1  -6  -1 3728.74  111.12
   1   6  -1 3721.24  123.18
  -1   6   1 3864.67  116.76
  -1  -6  -1 4055.14  124.74
   1  -6   1 3953.96  118.98
   1   6   2  199.87   62.24
  -1   6  -2  250.54   76.59
   1  -6  -2  234.74   56.50
  -1  -6   2  227.34   35.90
   1   6  -2  180.88   83.73
  -1   6   2  225.17   28.82
  -1  -6  -2  190.91   25.29
   1  -6   2  241.53   64.49
   1   6   3 7210.18  215.66
   1  -6  -3 7397.28  189.84
  -1   6  -3 6984.96  202.73
  -1  -6   3 7640.38  206.39
  -1   6   3 7455.31  192.77
  -1  -6  -3 7002.89  187.17
   1   6  -3 6751.11  192.23
   1  -6   3 7210.27  195.43
   1   6   4   24.90   17.48
  -1  -6   4    8.37   23.35
   1  -6  -4   26.01   18.90
  -1   6  -4   13.45   25.15
  -1   6   4   17.48   21.82
  -1  -6  -4   18.36   18.39
   1   6  -4   54.19   45.70
   1  -6   4   20.39   22.35
   1   6   5 5672.89  129.11
  -1  -6   5 5896.58  157.98
   1  -6  -5 5783.44  108.98
  -1   6  -5 5735.17  140.13
  -1   6   5 5733.06  116.45
   1  -6   5 5768.30  139.76
   1  -6  -6  687.80   28.15
   1   6   6  676.35   36.42
  -1   6  -6  709.59   45.53
  -1  -6   6  746.21   44.42
   1   6  -6  945.87  179.07
  -1  -6  -6  671.33   33.44
  -1   6   6  752.47   30.37
   1  -6   6  616.06   41.53
  -1   6  -710511.66  437.02
   1  -6  -711255.03  446.17
  -1  -6   710853.33  463.25
   1   6  -711105.56  482.18
  -1  -6  -711034.13  445.17
   1  -6   711590.90  476.47
  -1   6  -8   27.22   27.81
   1  -6  -8   47.67   15.62
  -1  -6   8   28.18   24.81
   1   6  -8   33.20   30.03
  -1  -6  -8   34.00   24.10
   1  -6   8   34.27   29.80
  -1   6  -9 6736.24  247.75
   1  -6  -9 6666.75  212.34
   1  -6  -9 6848.38  218.96
  -1  -6   9 6967.77  247.29
   1   6  -9 6884.00  256.13
   1  -6   9 6608.92  246.44
  -1  -6  -9 6841.63  230.65
   1  -6 -10  672.78   24.82
  -1   6 -10  720.27   67.22
   1   6 -10  902.37  147.43
  -1  -6 -10  630.70   89.85
  -1  -6 -10  659.68   77.37
  -1   6 -11 4423.40  264.86
   1  -6 -11 4939.26  269.01
   1  -6 -11 4927.97  268.95
   1   6 -11 4327.65  270.73
  -1  -6 -11 4803.61  269.34
  -1  -6 -11 4651.18  270.49
  -1   6 -12  134.55   45.39
   1  -6 -12   61.79   23.19
   1  -6 -12   50.49   20.76
   1   6 -12   17.82   33.02
  -1  -6 -12   28.54   21.46
  -1  -6 -12   53.96   35.43
   1  -6 -13  819.27   55.20
  -1   6 -13  686.76   78.73
   1  -6 -13  878.45   50.65
   1   6 -13  803.74  198.26
  -1  -6 -13  881.62   61.26
   1  -6 -14  876.20   46.03
  -1   6 -14  791.41   76.06
   1  -6 -14  851.43   57.45
   1   6 -14 1044.27   93.66
  -1  -6 -14  903.25   53.53
   1  -6 -15 2222.87  128.10
  -1   6 -15 2144.58  152.84
   1   6 -15 1967.52  149.31
  -1   6 -16  300.36  132.22
   1  -6 -16  269.23   62.33
   1   6 -16  373.92   96.93
  -1  -6 -16  304.95  103.95
   1  -6 -17  356.82   61.96
  -1   6 -17  424.53   64.60
   1   6 -17  389.93   67.11
  -1  -6 -17  263.41   71.51
  -1   6 -18   17.19   38.79
   1   6 -18  -14.09   27.42
  -1  -6 -18   33.38   23.65
  -1   6 -19  333.65   64.48
   1   6 -19  415.19   67.75
  -1   6 -20   33.72   42.86
   1   6 -20  108.24   56.38
  -1   6 -21  113.91  103.20
   1   6 -21  227.71   61.44
  -1   6 -22   75.70   61.76
   1   6 -22  133.91   56.59
   1   7   0 2954.53  109.60
  -1   7   0 3058.80  106.40
  -1  -7   0 2779.68   95.48
   1  -7   0 2947.20   94.46
   1   7   1  646.60   63.28
  -1   7  -1  707.82   72.84
  -1  -7   1  650.12   60.23
   1  -7  -1  671.81   60.97
  -1   7   1  718.48   61.36
   1   7  -1  631.41   61.21
  -1  -7  -1  801.30   77.78
   1  -7   1  669.37   62.99
   1   7   2 1798.77   94.43
   1  -7  -2 1965.58   65.10
  -1   7  -2 1910.62   75.15
  -1  -7   2 1950.28   75.55
   1   7  -2 1768.89   67.21
  -1  -7  -2 2020.85   63.13
  -1   7   2 1808.37   61.84
   1  -7   2 1798.00   71.27
   1   7   3 3127.63  130.72
  -1   7  -3 3126.77   97.85
   1  -7  -3 3267.22   82.10
  -1  -7   3 3449.50  104.21
  -1  -7  -3 3194.49  112.88
   1   7  -3 3372.59  104.60
  -1   7   3 3528.59   89.69
   1  -7   3 3196.39  135.21
   1   7   4   31.29   18.30
  -1  -7   4   30.06   27.30
  -1   7  -4   23.75   28.45
   1  -7  -4   36.60   17.86
  -1   7   4   28.88   24.40
   1   7  -4   62.94   46.85
  -1  -7  -4   37.35   21.89
   1  -7   4   10.84   22.13
   1   7   5  364.71   30.32
   1  -7  -5  371.69   42.35
  -1   7  -5  402.04   39.17
  -1   7   5  413.40   25.73
   1   7  -5  455.24   39.94
  -1  -7  -5  360.21   25.66
   1  -7   5  463.44   91.82
   1   7   6   73.17   19.04
  -1   7  -6   69.52   38.30
   1  -7  -6   89.54   25.90
  -1  -7   6   64.56   24.18
   1   7  -6  116.19   18.89
  -1  -7  -6   63.46   16.91
   1  -7   6  102.57   29.59
   1  -7  -7  602.44   37.52
  -1   7  -7  661.49   57.98
  -1  -7   7  524.33  126.53
   1   7  -7  478.50   47.34
  -1  -7  -7  623.55   45.63
   1  -7   7  652.18   57.53
  -1   7   7  588.23   35.37
  -1   7  -8  436.26  135.25
   1  -7  -8  419.48   73.21
  -1  -7   8  412.71  116.35
   1   7  -8  497.67  126.78
  -1  -7  -8  452.03   40.62
  -1   7  -9  -22.46   31.57
   1  -7  -9   12.12    9.68
   1   7  -9   66.47   41.22
  -1  -7  -9   19.92   14.57
  -1   7 -10  487.63  110.69
   1  -7 -10  364.49   19.78
   1  -7 -10  333.58   17.97
   1   7 -10  442.57  125.67
  -1  -7 -10  351.58   58.69
  -1  -7 -10  348.39   28.77
   1  -7 -11  419.14   24.84
  -1   7 -11  340.59  102.16
   1   7 -11  370.51   50.72
  -1  -7 -11  422.62   68.73
  -1  -7 -11  478.64   72.52
  -1   7 -12 1517.15  249.18
   1  -7 -12 1440.43   51.27
   1  -7 -12 1564.20   53.45
   1   7 -12 1512.47  103.83
  -1  -7 -12 1385.70   76.51
  -1  -7 -12 1510.53   80.41
   1  -7 -13  856.38   49.88
  -1   7 -13  843.35   78.09
   1   7 -13  748.19   89.95
  -1  -7 -13  737.23   65.10
  -1  -7 -13  809.42  109.21
   1  -7 -14  545.56   25.21
  -1   7 -14  575.78   95.16
   1   7 -14  582.05   80.19
  -1  -7 -14  393.97  120.22
  -1  -7 -14  598.41   38.60
  -1   7 -15  -25.46   31.46
   1  -7 -15    9.18    6.40
   1   7 -15   34.30   31.18
  -1  -7 -15   35.96   24.40
  -1  -7 -15    2.79   11.37
   1  -7 -16   -1.84    4.79
  -1   7 -16   84.33   46.33
   1   7 -16   47.20   36.98
  -1  -7 -16   18.49   15.80
  -1   7 -17  494.83   65.30
   1   7 -17  304.39  117.54
  -1  -7 -17  206.82  102.30
  -1   7 -18  178.15   61.00
   1   7 -18  237.49   69.76
  -1   7 -19   54.75   43.12
   1   7 -19   13.46   17.95
  -1   7 -20  -14.96   31.82
   1   7 -20   29.26   30.43
  -1   7 -21   36.30   23.23
   1   7 -21   59.36   39.05
  -1   7 -22   36.46   41.05
   1   8   0   14.85   17.77
  -1  -8   0   10.84   24.96
  -1   8   0   -9.01   18.57
   1  -8   0   14.65   16.92
   1   8   1 6235.42  146.42
  -1  -8   1 6332.15  145.68
  -1   8  -1 5905.44  161.23
   1  -8  -1 6436.97  139.50
  -1  -8  -1 6327.54  142.99
   1   8  -1 6094.51  148.85
   1   8   2 2449.21  153.63
  -1   8  -2 2507.88  130.08
  -1  -8   2 2602.32  132.02
   1  -8  -2 2563.32  118.15
  -1   8   2 2497.58  114.14
   1   8  -2 2494.10  128.79
  -1  -8  -2 2623.41  126.44
   1  -8   2 2530.36  146.12
   1   8   3 4222.87  189.48
  -1  -8   3 4558.49  206.74
   1  -8  -3 4047.94  176.93
  -1   8  -3 4168.66  194.52
   1   8  -3 3759.57  175.93
  -1  -8  -3 4095.51  179.34
   1  -8   3 4019.41  209.35
   1   8   4  814.99   60.78
  -1   8  -4  680.06  165.77
   1   8  -4  822.89   94.02
  -1  -8  -4  587.14   86.96
  -1   8   4  631.62   43.80
   1  -8   4  603.96   98.44
  -1   8  -5  221.75   59.95
   1   8   5  173.70   42.92
   1  -8  -5  151.00   51.35
  -1  -8   5   91.55   21.72
   1   8  -5  202.45   55.85
  -1  -8  -5  148.47   36.71
  -1   8   5  157.00   38.94
   1  -8   5  136.64   33.88
   1   8   6   41.36   21.85
   1  -8  -6   40.97   14.24
  -1  -8   6   35.80   24.71
  -1   8  -6   27.58   20.13
  -1   8   6   42.69   18.88
  -1  -8  -6   26.00   18.20
   1   8   7 2051.84  110.36
   1  -8  -7 2114.41  105.74
  -1   8  -7 2188.38  132.92
   1   8  -7 2195.78  130.46
  -1   8   7 2118.28  106.78
  -1  -8  -7 2099.07  108.32
   1  -8  -8  505.12   25.60
  -1   8  -8  496.46   54.65
  -1  -8  -8  505.36   35.27
  -1   8  -9 2735.94  176.90
   1  -8  -9 2418.37  136.57
   1   8  -9 2528.42  169.34
  -1  -8  -9 2691.38  158.89
  -1   8 -10  869.64  160.45
   1  -8 -10  705.34   39.86
   1  -8 -10  676.80   36.18
  -1  -8 -10  717.10   45.35
   1   8 -10  782.12  197.52
  -1   8 -11   79.71   38.19
   1  -8 -11   45.64   18.07
   1  -8 -11   73.49   27.39
   1   8 -11    9.48   32.17
  -1  -8 -11   83.99   32.30
  -1  -8 -11   29.01   21.64
  -1   8 -12  264.97   51.72
   1  -8 -12  133.50   44.25
   1  -8 -12  155.62   25.75
  -1  -8 -12   79.56   48.10
   1   8 -12  240.11   94.57
  -1  -8 -12  133.07   60.07
  -1   8 -13  400.41   71.81
   1  -8 -13  387.62   24.21
   1  -8 -13  281.13   26.52
  -1  -8 -13  306.26   98.02
   1   8 -13  389.69  115.87
  -1  -8 -13  288.52   99.42
   1  -8 -14  443.60   81.33
  -1   8 -14  560.44   82.70
   1   8 -14  573.69  143.58
  -1  -8 -14  373.68   76.06
  -1  -8 -14  442.32  116.66
  -1   8 -15 1933.40  150.58
   1  -8 -15 1527.69   87.45
   1   8 -15 1747.55  134.60
  -1  -8 -15 1983.86  126.91
  -1   8 -16 1276.48  180.79
   1   8 -16 1399.19  309.12
  -1  -8 -16 1220.00   92.65
  -1   8 -17  288.23   63.82
   1   8 -17  232.46  100.67
  -1   8 -18  160.79   73.66
   1   8 -18  241.26  109.67
  -1   8 -19  126.81   71.29
   1   8 -19   43.69   43.31
  -1   8 -20   69.39   40.16
   1   8 -20   -7.25   30.38
  -1   8 -21  326.07  132.84
   1   8 -21  257.61  105.03
  -1   9   0 3296.14  133.96
   1   9   0 3408.94  146.79
  -1  -9   0 3502.60  139.70
   1  -9   0 3442.41  132.01
   1   9   1 1622.66   78.89
  -1   9  -1 1606.95   81.93
   1  -9  -1 1763.74   82.62
  -1  -9   1 1794.07   87.47
  -1   9   1 1969.96   93.15
   1   9  -1 1591.96   82.43
  -1  -9  -1 1802.43  113.78
   1  -9   1 1771.15   90.88
   1   9   2    9.80   22.28
   1  -9  -2   15.84   19.26
  -1   9  -2  -11.96   23.63
  -1  -9   2   27.55   23.99
   1   9  -2  138.29   46.43
  -1  -9  -2  -10.68   18.18
  -1   9   2   55.66   25.02
   1  -9   2   20.81   21.39
   1   9   3   61.33   28.95
  -1  -9   3   44.47   27.63
  -1   9  -3  113.36   30.06
   1  -9  -3    4.33   14.86
  -1   9   3   59.91   29.83
  -1  -9  -3  109.78   33.52
   1   9  -3   -0.31   28.12
   1  -9   3   24.76   20.69
   1   9   4  887.70   53.22
  -1   9  -4  818.78   59.59
   1  -9  -4  779.98   47.54
  -1  -9   4  879.33   76.88
  -1   9   4  788.76   44.79
   1   9  -4  721.21   68.74
  -1  -9  -4  907.53   58.04
   1  -9   4  829.79   86.22
   1   9   5  669.17  114.87
  -1   9  -5  660.22  157.39
   1  -9  -5  586.47   34.64
  -1  -9  -5  605.91   45.17
  -1   9   5  659.51   90.11
   1   9  -5  591.75  144.05
   1   9   6  946.12   65.43
   1  -9  -6  973.75   60.37
  -1   9  -6  961.49   84.09
  -1   9   6  996.28   63.83
   1   9  -6 1098.32   83.63
  -1  -9  -6  842.47   58.75
  -1   9  -7   -6.11   27.60
   1   9   7   17.80   17.00
   1  -9  -7   23.71   16.79
  -1   9   7   21.33    8.99
   1   9  -7   20.95   25.42
  -1  -9  -7   17.11   14.37
  -1   9  -8 2781.08  186.77
   1  -9  -8 2903.37  164.03
   1   9  -8 2572.87  193.44
  -1   9   8 2892.98  169.85
  -1  -9  -8 2798.72  165.74
   1  -9  -9   15.11   12.67
  -1   9  -9   12.75   31.85
   1   9  -9  -16.28   29.46
  -1  -9  -9   25.42   20.03
   1  -9 -10   93.74   16.27
  -1   9 -10   57.43   28.32
   1   9 -10   50.12   32.15
  -1  -9 -10  134.67   32.05
   1  -9 -11 1696.24   68.47
  -1   9 -11 1600.17   97.20
   1  -9 -11 1775.56   68.99
   1   9 -11 1959.96  125.54
   1  -9 -12  291.82   59.21
   1  -9 -12  407.83   41.59
  -1   9 -12  280.52   60.40
  -1  -9 -12  430.47   46.34
   1   9 -12  249.12   85.56
  -1  -9 -12  352.00   61.71
   1  -9 -13   43.45   11.52
  -1   9 -13   60.34   38.09
   1  -9 -13   38.46   16.34
   1   9 -13  152.17   58.98
  -1  -9 -13   65.55   29.36
  -1  -9 -13   29.57   20.14
  -1   9 -14   43.73   49.53
   1  -9 -14   14.94    6.63
   1   9 -14   84.96   37.17
  -1  -9 -14   54.07   29.76
  -1   9 -15  184.62  104.24
   1   9 -15  121.83   62.19
  -1  -9 -15  132.26   49.78
  -1   9 -16   70.17   39.55
   1   9 -16   76.84   39.81
  -1  -9 -16   19.06   20.31
  -1   9 -17  268.87   76.87
   1   9 -17  198.21   70.74
  -1   9 -18   70.19   39.12
   1   9 -18  136.56   63.96
  -1   9 -19   -7.57   35.12
   1   9 -19   99.14   64.63
  -1   9 -20  100.74   55.06
   1   9 -20   62.18   81.30
  -1  10   0  132.01   51.71
   1  10   1  559.11  137.79
  -1 -10   1  466.99   43.93
  -1  10  -1  469.09   56.02
   1 -10  -1  364.27  104.32
  -1  10   1  542.02   56.94
  -1 -10  -1  517.77   44.00
   1  10  -1  624.06   65.77
   1 -10   1  400.78  135.17
  -1  10  -2  832.57   76.20
  -1  10   2  876.05   71.96
   1 -10   2  584.23  149.81
   1  10   3  117.86   46.68
   1 -10  -3  152.02   35.52
  -1  10  -3  140.73   45.25
  -1  10   3  146.86   38.08
  -1 -10  -3   88.77   43.99
   1  10  -3  162.02   50.27
   1  10   4  979.19   81.19
   1 -10  -4 1026.19   79.00
  -1  10  -4 1017.19   91.94
  -1  10   4  920.38   82.91
  -1 -10  -4 1057.49   82.42
   1  10  -4  994.41   90.90
   1  10   5   78.57   27.46
   1 -10  -5   71.12   31.76
  -1  10  -5  145.80   48.74
  -1  10   5   91.71   23.25
  -1 -10  -5   99.83   32.53
   1  10  -5  134.63   38.10
   1  10   6  147.76   35.97
   1 -10  -6   76.98   27.45
   1  10  -6   87.82   35.85
  -1 -10  -6   85.10   30.69
   1  10   7   21.00   23.72
  -1  10  -7   48.64   46.79
   1 -10  -7    5.23    9.66
   1  10  -7  -22.32   27.10
   1  10   8  541.03   53.80
   1 -10  -8  419.88   76.69
  -1  10  -8  714.20   78.35
  -1  10   8  510.53   79.35
  -1 -10  -8  515.03   56.12
   1  10  -8  670.69   93.31
   1 -10  -9  148.90   22.56
  -1  10  -9  153.48   46.47
   1  10  -9  160.66   55.12
  -1 -10  -9  146.93   32.25
   1 -10 -10 1621.34   70.27
  -1  10 -10 1376.55  100.50
   1  10 -10 1680.14  100.94
  -1 -10 -10 1510.71   73.94
  -1  10 -11  497.56   86.33
   1 -10 -11  325.79   32.54
   1 -10 -11  417.70   38.08
   1  10 -11  420.31  107.35
   1 -10 -12  442.28   42.53
   1 -10 -12  528.87   26.70
  -1  10 -12  400.55  136.04
  -1 -10 -12  335.47   57.29
   1  10 -12  658.55   95.52
  -1 -10 -12  565.54   48.16
  -1  10 -13   32.27   22.35
   1 -10 -13   13.77    8.94
   1  10 -13  123.42   50.77
  -1 -10 -13   16.02   18.73
  -1  10 -14   45.43   34.25
  -1 -10 -14  141.55   37.76
  -1  10 -15   32.08   38.57
   1  10 -15   92.44   52.22
  -1 -10 -15   29.56   16.86
  -1  10 -16  153.42   58.32
   1  10 -16  265.48   78.55
  -1  10 -17  130.99   57.26
   1  10 -17   39.53   38.50
  -1  10 -18  245.91   72.49
   1  10 -18   55.49   34.47
  -1  10 -19   -0.10   32.39
   1  10 -19  113.73   65.08
  -1  10 -20  115.90   60.35
   1  11   0  139.43   39.44
  -1  11   0  248.12   58.04
   1  11   1   14.82   23.68
   1 -11  -1   23.08   16.62
   1  11  -1  108.45   47.22
  -1 -11  -1   10.26   20.62
   1  11   2  328.91  103.27
   1 -11  -2  201.39   68.54
  -1  11  -2  346.63   83.63
  -1  11   2  291.07   36.98
  -1 -11  -2  221.19   64.85
   1  11  -2  439.53   60.05
   1  11   3  146.66   44.68
  -1  11  -3  150.59   35.10
   1 -11  -3   87.50   35.12
  -1 -11  -3   77.00   36.14
  -1  11   3   81.47   39.96
   1  11  -3  128.16   47.84
   1  11   4  212.02   59.26
   1 -11  -4  152.74   55.89
  -1  11  -4  265.35   67.31
  -1  11   4  163.55   34.26
  -1 -11  -4  182.10   55.68
   1  11  -4  264.17   52.50
   1  11   5   20.11   31.35
   1 -11  -5   11.28    7.08
  -1  11  -5   57.84   42.40
  -1  11   5    4.82   10.86
  -1 -11  -5   17.10   19.49
   1  11  -5   19.64   31.00
   1  11   6  338.66   73.14
   1 -11  -6  212.31   27.80
  -1  11  -6  344.49  103.29
  -1 -11  -6  177.26   62.49
   1  11  -6  234.26   69.03
   1  11   7  165.90   46.91
  -1  11  -7  184.19   57.36
   1 -11  -7  101.27   43.68
  -1 -11  -7  109.25   33.44
  -1  11   7  163.91   45.77
   1  11  -7  270.59   62.83
   1  11   8  122.60   38.87
   1 -11  -8  192.55   28.66
  -1  11  -8  161.26   56.34
  -1  11   8  123.00   48.53
  -1 -11  -8  203.25   66.51
   1  11  -8  185.26   63.09
  -1  11  -9  112.70   62.40
   1 -11  -9   28.47   18.66
   1  11  -9   44.97   37.92
  -1 -11  -9   36.86   19.48
  -1  11 -10    3.87   24.16
   1 -11 -10   16.28   15.00
   1  11 -10  113.64   62.18
  -1  11 -11   43.95   44.43
   1 -11 -11    9.77    7.90
   1  11 -11  -13.05   35.52
  -1 -11 -11    8.88   15.40
  -1  11 -12  321.66   90.04
   1 -11 -12  191.69   33.60
   1  11 -12  138.85   51.08
  -1  11 -13   -1.78   33.39
   1  11 -13  -11.76   26.93
  -1 -11 -13   32.24   18.54
  -1  11 -14   97.32   56.41
   1  11 -14   49.17   52.40
  -1 -11 -14   -5.54   12.13
  -1  11 -15  102.71   61.74
   1  11 -15  143.43   60.89
  -1  11 -16   55.46   61.95
   1  11 -16   87.30   51.01
  -1  11 -17  111.56   40.64
   1  11 -17  102.57   59.22
  -1  11 -18  105.64   45.56
   1  11 -18   49.72   32.16
  -1  11 -19   50.16   39.56
   1  11 -19   98.86   58.35
   1  12   0   80.37   34.17
   1  12   1  613.62  167.27
  -1  12  -1  571.75   63.75
  -1  12   1  613.06   69.17
   1  12  -1  626.43   67.17
   1  12   2  184.53   81.69
   1 -12  -2  120.42   33.35
  -1  12  -2  281.20   90.76
   1  12  -2  251.77   53.98
  -1  12   2  151.66   40.08
  -1  12  -3  370.10  100.58
   1  12   3  326.84   70.53
   1 -12  -3  208.42   69.82
   1  12  -3  315.06   69.15
  -1  12   3  313.87   72.28
   1  12   4  234.77   68.06
  -1  12  -4  101.54   41.45
   1 -12  -4   -1.28   17.37
  -1  12   4   73.60   29.47
   1  12   5  670.13   80.04
   1 -12  -5  561.22   39.44
  -1  12  -5  621.25   67.32
  -1  12   5  631.49  143.78
  -1 -12  -5  513.39  110.83
   1  12  -5  706.75   73.54
   1  12   6  382.55   75.60
   1 -12  -6  190.14   83.53
  -1  12  -6  299.75  104.25
  -1 -12  -6  310.61   83.71
  -1  12   6  317.31   79.35
   1  12   7  570.76   78.71
   1 -12  -7  433.00   83.34
  -1  12  -7  682.84   81.19
  -1 -12  -7  400.46  109.85
   1  12  -7  654.08   75.21
  -1  12  -8   31.99   49.03
   1  12   8   77.94   48.69
   1 -12  -8   14.74   10.15
   1  12  -8  285.47   99.31
  -1  12   8   15.86   12.08
   1 -12  -9  560.89   43.35
  -1  12  -9  545.75  141.37
   1  12  -9  548.02  160.63
  -1  12   9  592.59   85.43
  -1  12 -10  125.42   53.51
   1  12 -10   28.18   33.50
  -1 -12 -10   12.97   23.55
  -1  12 -11  479.49   61.74
   1  12 -11  586.38  117.67
  -1  12 -12  154.77   52.16
   1  12 -12   49.21   46.56
  -1  12 -13  299.35   66.06
   1  12 -13  226.03   66.63
  -1 -12 -13   88.67   34.95
  -1  12 -14  200.97  111.65
   1  12 -14  318.46  146.84
  -1  12 -15  301.92   89.99
   1  12 -15  151.34   74.75
  -1  12 -16  327.81  100.48
   1  12 -16  212.40  131.97
  -1  12 -17  104.18   56.71
   1  12 -17   62.57   47.08
  -1  12 -18   31.75   52.00
   1  12 -18   -5.59   38.81
   1  13   0 2371.05  121.26
  -1  13   0 2733.51  144.16
  -1  13  -1   42.37   39.69
   1  13   1   20.17   21.49
  -1  13   1   75.31   35.13
   1  13  -1   42.23   31.44
   1  13   2  307.51   77.86
  -1  13  -2  252.75   46.01
  -1  13   2  225.15   42.06
   1  13  -2  273.94   55.33
   1  13   3   85.95   35.26
  -1  13  -3  186.64   54.59
  -1  13   3   72.73   32.46
   1  13  -3   29.59   28.78
   1  13   4   46.46   28.99
   1 -13  -4   20.98   12.85
  -1  13  -4   66.74   33.01
   1  13  -4   25.50   39.88
  -1  13   4   28.07   12.28
   1  13   5   40.03   28.64
  -1  13  -5   57.29   45.06
   1 -13  -5   13.12   19.70
  -1  13   5   -2.56   17.44
   1  13  -5  -17.72   31.31
   1  13   6   62.54   38.34
  -1  13  -6   34.60   45.27
  -1  13   6   91.91   39.03
   1  13  -6  108.51   69.44
   1  13   7   91.46   33.76
  -1  13  -7  179.54   56.73
   1 -13  -7   57.26   29.33
   1  13  -7   69.27   49.59
   1  13   8   24.14   30.95
  -1  13  -8   26.78   30.77
   1  13  -8   56.68   46.37
   1  13   9   17.60   18.04
  -1  13  -9   88.54   47.96
  -1  13   9   25.10   23.26
   1  13  -9   21.30   38.06
  -1  13 -10  200.59   63.53
   1  13 -10  282.96   72.71
  -1  13 -11   81.12   49.08
   1  13 -11   50.57   26.20
  -1  13 -12  592.71  111.25
   1  13 -12  603.89  158.85
  -1  13 -13   68.75   43.35
   1  13 -13   38.34   42.40
  -1  13 -14  426.94   75.72
   1  13 -14  375.94  118.99
  -1  13 -15   59.50   43.28
   1  13 -15   -0.14   43.57
  -1  13 -16   42.39   62.82
   1  13 -16   40.50   52.66
  -1  13 -17  247.26  107.30
   1  13 -17    5.18   46.25
   1  14   0  117.80   44.70
  -1  14   0   40.36   18.22
  -1  14  -1  397.62   67.11
   1  14   1  353.51  133.85
  -1  14   1  337.14   55.82
   1  14  -1  374.15   90.84
   1  14   2  116.22   49.33
  -1  14  -2  153.61   59.52
  -1  14   2   40.81   22.50
   1  14   3  976.53  207.28
  -1  14  -3  913.95   98.27
  -1  14   3  825.68  183.79
   1  14  -3  724.49   67.47
   1  14   4  186.17   61.21
  -1  14  -4  299.76   61.03
  -1  14   4  231.21  119.39
   1  14  -4  179.80   45.94
  -1  14  -5  904.60  246.93
   1  14   5  958.58  118.60
   1  14  -5  926.66   90.29
  -1  14   5 1109.39   91.87
   1  14   6   52.83   32.89
  -1  14  -6    1.96   34.22
  -1  14   6  100.08   39.01
   1  14  -6   84.31   51.31
   1  14   7 1752.55  136.20
  -1  14  -7 1618.17  140.59
   1  14  -7 1369.51  139.46
  -1  14  -8  435.27  217.43
   1  14   8  377.84  160.89
   1  14  -8  668.60  100.17
  -1  14   8  330.53  123.59
  -1  14  -9 1259.63  112.28
   1  14   9 1329.34   87.07
   1  14  -9 1508.64  140.05
  -1  14   9 1253.19  140.83
  -1  14 -10  393.29  191.67
   1  14 -10  251.24   77.28
  -1  14 -11  882.09   98.29
   1  14 -11  950.69  108.92
  -1  14 -12   34.90   56.83
   1  14 -12   71.46   60.10
  -1  14 -13  436.17   87.71
   1  14 -13  327.98   96.07
  -1  14 -14  258.93   70.26
   1  14 -14  245.97   71.53
  -1  14 -15  351.96  109.49
  -1  15   0  592.15   93.17
   1  15   0  389.03   81.72
   1  15   1   67.88   36.32
  -1  15  -1   52.66   41.94
  -1  15   1   19.65   17.99
   1  15  -1   -3.48   30.25
  -1  15  -2   65.23   54.28
   1  15   2   25.07   26.74
  -1  15   2   56.37   43.94
   1  15  -2  105.81   54.75
   1  15   3   69.44   40.38
  -1  15  -3   14.06   28.88
   1  15  -3   47.83   35.04
  -1  15   3   26.34   29.65
  -1  15  -4  740.74  104.81
  -1  15   4  805.56  143.19
   1  15  -4  987.38  115.97
  -1  15  -5    3.18   34.63
  -1  15   5   39.32   28.25
   1  15  -5   43.06   40.42
   1  15   6  951.83  116.76
  -1  15  -6 1189.12  116.13
  -1  15   6  816.57   71.32
   1  15  -6  957.79   92.54
   1  15   7   48.66   22.93
  -1  15  -7   20.37   36.27
   1  15  -7   85.25   66.75
   1  15   8 1365.80   88.07
  -1  15  -8 1271.52  109.22
  -1  15   8 1317.58   88.15
   1  15  -8 1213.46  116.68
   1  15   9   27.94   27.01
  -1  15  -9   51.78   51.82
   1  15  -9  -38.74   31.38
  -1  15 -10  111.79   58.87
   1  15 -10   60.38   57.37
  -1  15 -11   79.54   49.57
   1  15 -11  -21.99   41.39
  -1  15 -12  200.05   90.52
   1  15 -12  106.51   63.78
  -1  15 -13   87.86   68.54
   1  15 -13  147.48   68.91
  -1  15 -14  109.98   54.38
   1  15 -14   82.48   58.84
   1  16   0   41.01   30.43
  -1  16   0   18.14   31.68
   1  16   1  451.21  117.19
  -1  16  -1  277.79   49.25
   1  16  -1  410.00   88.80
  -1  16   1  398.12   98.32
  -1  16  -2  368.17   75.77
   1  16   2  410.73  152.62
   1  16  -2  374.90   92.07
  -1  16   2  345.02   85.20
   1  16   3  388.19   93.80
  -1  16  -3  440.57   81.05
   1  16  -3  358.61   79.48
  -1  16   3  283.51   77.81
  -1  16  -4  321.47   68.54
   1  16   4  334.37   77.85
   1  16  -4  386.49   83.68
  -1  16   4  328.63   82.31
   1  16   5  738.87  214.54
  -1  16  -5  961.33   98.27
  -1  16   5  541.86  193.24
   1  16  -5 1041.35  106.96
   1  16   6   86.93   47.91
  -1  16  -6   49.74   54.54
   1  16  -6   18.88   38.01
   1  16   7 2168.19  212.94
  -1  16  -7 1930.99  200.66
   1  16  -7 1910.42  193.68
   1  16   8   35.50   27.04
  -1  16  -8  110.96   76.00
   1  16  -8  141.09   65.13
  -1  16  -9 1319.91  104.33
   1  16  -9 1425.01  449.65
  -1  16 -10  253.18  175.28
   1  16 -10  376.98   75.01
  -1  16 -11  319.27  132.56
   1  16 -11  818.78  214.18
  -1  16 -12   39.06   44.30
   1  16 -12  167.67   84.22
  -1  17   0 1376.03  140.30
   1  17   1   69.26   27.70
  -1  17  -1    5.46   34.02
   1  17  -1  143.27   53.25
  -1  17   1   57.54   42.42
   1  17   2  314.66   93.50
  -1  17  -2  420.70   90.65
   1  17  -2  236.01   80.75
  -1  17   2  278.17   65.00
   1  17   3  142.86   71.76
  -1  17  -3   96.27   49.33
   1  17  -3   40.22   27.82
  -1  17   3  103.70   44.68
   1  17   4   74.39   37.69
  -1  17  -4  104.61   65.58
   1  17  -4    7.70   39.26
   1  17   5  120.20   48.76
  -1  17  -5   18.37   37.91
  -1  17   5   16.10   22.19
   1  17  -5   23.64   36.75
   1  17   6   53.73   30.43
  -1  17  -6    8.45   39.30
   1  17  -6   20.85   38.18
   1  17   7   19.06   30.63
  -1  17  -7   33.94   37.89
   1  17  -7  159.69   70.73
  -1  17  -8   18.14   39.45
   1  17  -8   99.17   71.04
   1  17  -9  146.57   54.83
  -1  17 -10  -13.48   37.90
   1  17 -10   94.49   76.16
   1  18   0   47.21   36.19
  -1  18  -1  543.79  151.44
   1  18   1  668.93  157.38
   1  18  -1  813.25  250.85
  -1  18   1  566.25  219.06
   1  18   2   32.59   37.92
  -1  18  -2   18.40   34.64
   1  18  -2   66.88   57.89
  -1  18   2   89.75   39.61
   1  18   3  160.41   57.15
   1  18  -3   88.29   64.69
   1  18   4  213.44   99.42
  -1  18  -4  495.04  141.84
   1  18  -4  235.11   96.05
  -1  18  -5  203.58  119.63
   1  18  -5  224.08   73.06
  -1  18  -6  115.98  100.01
   1  18  -6   23.96   43.27
   2   0  -1   25.94   11.90
  -2   0   1   13.40    8.59
   2   0  -2 8315.88  198.17
  -2   0   2 8076.97  193.65
  -2   0  -2 8913.53  219.67
   2   0  -3    6.37   12.56
  -2   0   3   28.45   15.62
  -2   0  -3    0.74   19.66
   2   0   3   10.22   13.20
   2   0  -413188.84  310.30
  -2   0   413363.40  313.97
   2   0   412996.18  316.15
  -2   0  -412990.15  315.99
   2   0  -5    0.19   11.90
  -2   0   5    0.08   10.84
  -2   0  -5   14.85   15.14
   2   0   5   27.17   23.27
   2   0  -613840.20  329.19
  -2   0   613629.78  324.11
  -2   0  -613938.03  357.78
   2   0   613115.86  341.24
   2   0  -7   22.11   22.54
  -2   0   7   10.93    9.92
  -2   0  -7    4.34   23.07
   2   0   7    8.25   19.02
   2   0  -820705.20  493.98
  -2   0   820044.86  479.48
  -2   0  -820503.16  535.89
   2   0   822111.42  543.16
   2   0  -9   -1.09   12.81
  -2   0  -9   15.49   20.14
  -2   0   9   22.17   19.26
   2   0   9   43.65   30.86
   2   0 -10  157.95   30.37
  -2   0  10  140.05   31.71
  -2   0 -10  154.58   35.08
   2   0  10   80.58   20.03
   2   0 -11   26.86   23.23
  -2   0 -11   67.22   26.23
  -2   0  11   12.97    8.58
   2   0  11   25.22   17.99
   2   0 -12  119.73   36.44
  -2   0 -12  151.90   41.93
  -2   0  12  138.06   35.83
   2   0  12   94.51   24.99
   2   0 -13   36.46   21.14
  -2   0 -13   20.63   22.82
  -2   0  13   16.20   15.37
   2   0  13   16.07   13.44
   2   0 -14 1124.46   61.97
  -2   0 -14 1191.09   81.53
   2   0  14 1188.21   65.71
   2   0 -15    5.43   19.67
  -2   0 -15   32.18   14.37
  -2   0  15   16.12   14.65
   2   0  15   23.16   26.59
   2   0 -16 2321.07  117.29
  -2   0 -16 2420.58  139.07
  -2   0  16 2073.31   96.26
   2   0 -17   17.99   16.94
  -2   0 -17   25.11   38.54
   2   0 -18 2876.62  186.98
  -2   0 -18 2486.40  172.24
   2   0 -19   20.99   19.89
  -2   0 -19   51.68   42.66
   2   0 -21    4.72   19.69
  -2   0 -22  208.18   59.58
   2   1   0   11.83    9.93
  -2  -1   0    7.76    9.52
  -2   1   0   14.57   12.56
   2  -1   0   17.91    9.06
  -2   1  -110241.61  244.39
  -2  -1   110009.21  240.30
  -2  -1  -110152.22  248.84
   2  -1   110193.18  248.68
   2   1  -110557.42  253.25
  -2   1   110018.89  234.43
  -2   1  -217834.60  425.82
  -2  -1   217574.74  412.23
   2   1  -217049.81  401.45
  -2   1   216986.39  390.71
   2  -1   217454.17  413.23
  -2   1  -3   65.40   17.40
  -2  -1   3   61.60   19.24
   2   1  -3   56.85   18.10
  -2   1   3   77.92   12.21
   2  -1   3   51.29   15.18
   2  -1  -4 3608.82   91.44
  -2  -1   4 3651.03  103.87
  -2   1  -4 3783.47  120.30
  -2   1   4 3649.26   89.41
   2  -1   4 3560.38  102.64
  -2  -1  -4 3914.32  109.59
   2  -1  -5  211.03   19.57
  -2   1  -5  222.46   29.10
  -2  -1   5  270.84   34.54
  -2   1   5  257.10   23.96
   2   1  -5  284.94   32.67
   2  -1   5  236.05   28.64
  -2  -1  -5  322.41   37.37
   2  -1  -6  220.41   32.96
  -2   1  -6  237.93   60.46
  -2  -1   6  203.88   33.13
  -2   1   6  198.16   20.40
   2   1  -6  192.27   47.21
   2  -1   6  161.94   31.85
  -2  -1  -6  223.82   34.98
   2  -1  -7 1320.32   60.38
  -2   1  -7 1204.07   65.65
  -2  -1   7 1457.82   85.20
   2   1   7 1342.36   54.77
  -2   1   7 1277.89   45.19
  -2  -1  -7 1339.67   70.79
   2  -1   7 1292.24   64.10
   2   1  -7 1276.65   66.71
   2   1   8   53.52   23.19
   2  -1  -8   21.38   12.64
  -2  -1   8   12.54   21.94
  -2   1  -8  -10.77   26.66
  -2   1   8   21.90   12.67
   2  -1   8   31.42   16.98
  -2  -1  -8   19.03   21.40
   2   1  -8   25.69   22.76
   2  -1  -9   15.70   10.45
   2   1   9   18.42   17.35
  -2  -1   9   48.13   29.33
  -2   1  -9    6.21   24.22
   2   1  -9   35.66   15.84
  -2   1   9   18.63   15.66
   2  -1   9   70.01   33.01
  -2  -1  -9   21.29   20.02
   2   1  10 4827.48  211.39
   2  -1 -10 4767.22  202.87
  -2   1 -10 4326.49  126.88
  -2  -1  10 4713.68  110.84
  -2  -1 -10 4653.64  193.93
  -2   1  10 4556.78   97.82
   2  -1  10 4460.56  198.73
   2   1 -10 4265.25  110.87
   2   1  11 2412.15  131.93
   2  -1 -11 2369.75  126.20
  -2  -1  11 2248.85  111.49
  -2   1 -11 2029.48  106.89
  -2  -1 -11 2407.38  156.15
  -2   1  11 2304.50  104.65
   2  -1  11 2341.88  235.96
   2   1 -11 2262.92  113.07
   2   1  12 1050.93   70.06
   2  -1 -12  905.41   52.84
  -2   1 -12 1085.12   87.29
  -2  -1  12 1055.76  142.39
  -2  -1 -12 1017.23   84.30
  -2   1  12  999.09   57.49
   2  -1  12  996.33  129.85
   2   1 -12  863.91   70.74
   2   1  13 2708.19  175.24
   2  -1 -13 2893.17  169.10
  -2   1 -13 2564.27  176.18
   2   1 -13 2577.35  155.43
  -2   1  13 2628.37  159.33
   2  -1  13 2513.38  178.86
  -2  -1 -13 2616.34  202.36
   2   1  14  254.95   78.05
   2  -1 -14  300.01   44.56
  -2   1 -14  396.54   75.69
  -2  -1  14  272.53   87.51
  -2  -1 -14  387.89   90.46
  -2   1  14  311.93   35.12
   2  -1  14  240.30   46.05
   2   1 -14  384.92   75.08
   2  -1 -15 1506.17  105.01
  -2   1 -15 1488.67  100.98
   2   1  15 1474.89  114.75
   2   1 -15 1282.46  106.70
  -2  -1 -15 1556.25  157.71
  -2   1  15 1374.96   83.66
  -2   1 -16  894.03   74.58
   2  -1 -16 1043.91   69.44
  -2  -1  16  915.73  153.80
  -2  -1 -16 1220.41  155.05
   2   1 -16 1167.98  145.63
  -2   1  16  990.86   57.91
   2  -1 -17  662.38  109.56
  -2   1 -17  941.96  102.78
   2   1 -17  925.27  139.08
  -2  -1 -17 1066.10  175.08
  -2   1  17  832.04   66.22
   2  -1 -18  598.16  133.40
  -2   1 -18  450.44   52.88
   2   1 -18  543.19   63.37
  -2  -1 -18  526.84  149.99
  -2   1 -19   43.09   20.54
   2  -1 -19   91.59   36.05
  -2  -1 -19   53.49   31.41
   2   1 -19  100.88   56.01
   2  -1 -20   13.57   19.62
  -2   1 -20   40.86   29.93
   2   1 -20   31.23   38.76
  -2  -1 -20   56.42   36.23
  -2   1 -21  222.84   73.79
   2   1 -21  153.31   72.83
  -2  -1 -21  118.97   87.18
  -2   1 -22  277.92   58.73
   2   1 -22  118.92   97.93
  -2  -1 -22  284.51   97.10
  -2   1 -23  127.85   57.29
  -2  -1 -23   67.59   37.59
  -2  -2   021839.33  514.91
   2   2   1  421.47   48.93
  -2   2  -1  409.15   37.75
  -2  -2   1  506.49   38.98
   2  -2  -1  402.63   35.54
   2   2  -1  438.82   41.53
  -2   2   1  402.47   31.51
   2  -2   1  410.40   58.00
  -2  -2  -1  383.18   36.93
   2   2   230083.04 2064.25
  -2   2  -234636.99 2377.33
  -2  -2   236822.00 2523.79
   2  -2  -227328.01 1871.32
   2   2  -239426.23 2702.26
  -2  -2  -230801.33 2112.51
   2  -2   235481.66 2432.84
  -2   2  -3  152.91   46.25
  -2  -2   3  171.61   58.12
   2   2  -3  127.04   29.77
  -2  -2  -3  196.88   46.52
   2  -2   3  122.70   33.52
  -2  -2   4  715.77   55.88
  -2   2  -4  600.52   43.51
   2   2  -4  558.08   37.11
   2  -2   4  534.75   32.60
  -2  -2   5   29.25   18.38
  -2   2  -5   24.33   32.26
   2   2  -5   46.02   28.02
   2  -2   5   21.55   19.86
  -2  -2  -5   16.14   15.97
   2  -2  -6  865.50   27.27
  -2  -2   6  813.69   43.96
  -2   2  -6  902.88   50.29
   2   2  -6  992.43   50.43
  -2   2   6  933.40   28.04
   2  -2   6  890.88   45.02
  -2  -2  -6  939.69   75.55
   2  -2  -7   -2.07    5.93
  -2  -2   7   17.54   11.44
  -2   2  -7   72.52   45.20
   2   2  -7   35.81   29.46
  -2   2   7   11.34    7.47
   2  -2   7   21.82   24.39
  -2  -2  -7   14.92   20.52
  -2   2  -8  196.09   64.23
   2  -2  -8  196.71   24.23
  -2  -2   8  202.95   54.83
   2   2  -8  194.08   35.56
   2  -2   8  168.26   61.45
  -2  -2  -8  213.72   38.99
  -2   2   8  177.21   24.89
  -2   2  -9   42.03   25.29
   2  -2  -9   15.47   11.11
  -2  -2   9   26.05   28.16
   2   2  -9   27.10   20.23
   2  -2   9   35.37   21.02
  -2  -2  -9   -4.79   18.19
  -2   2   9   20.37    7.20
  -2   2 -10 1345.34   78.94
   2  -2 -10 1415.68   68.49
  -2  -2  10 1410.84   76.53
   2   2 -10 1253.29   75.84
   2  -2  10 1300.76   78.66
  -2  -2 -10 1619.28  103.80
  -2   2  10 1289.79   60.70
  -2  -2  11   41.32    9.25
   2  -2 -11   53.64   16.04
  -2   2 -11   84.25   38.54
   2   2 -11   64.73   22.96
  -2  -2 -11   83.53   31.23
   2  -2  11   26.11   13.40
  -2   2  11   52.67   14.14
   2  -2 -12 5238.63  245.88
  -2   2 -12 4791.78  245.33
  -2  -2  12 4710.86  237.01
   2   2 -12 4548.47  232.48
  -2  -2 -12 5259.94  249.27
   2  -2  12 4989.08  248.16
  -2   2  12 4653.58  216.00
  -2  -2  13   49.72   38.74
   2  -2 -13   39.87   18.92
  -2   2 -13   42.28   37.61
   2   2 -13   94.91   46.67
  -2  -2 -13   30.74   11.44
   2  -2  13   73.50   35.77
  -2   2  13   30.95   11.88
   2  -2 -14 2870.83   99.17
  -2   2 -14 2776.77  114.96
  -2  -2  14 2713.55  106.91
   2   2 -14 2657.73  160.59
  -2  -2 -14 2814.28  165.12
  -2   2  14 2656.46   92.15
   2  -2 -15   70.13   21.76
  -2  -2  15   80.55   28.07
  -2   2 -15   77.73   31.06
  -2  -2 -15   70.57   39.47
   2   2 -15  159.62   40.89
  -2   2  15   69.76   27.09
   2  -2 -16  976.05   57.59
  -2   2 -16  904.44  147.21
   2   2 -16 1042.19  167.25
  -2   2 -17  102.62   45.16
   2  -2 -17   62.41   31.14
  -2  -2 -17   92.88   38.84
   2   2 -17   10.84   24.16
   2  -2 -18  178.98   50.58
  -2   2 -18  235.81   66.28
   2   2 -18  208.36   66.83
  -2  -2 -18  198.97   70.14
   2  -2 -19   14.36   21.08
  -2   2 -19   27.20   21.81
   2   2 -19   78.08   47.82
  -2  -2 -19   17.68   20.66
  -2   2 -20   37.91   29.16
  -2  -2 -20   41.66   40.81
  -2   2 -21   40.06   34.05
   2   2 -21   46.22   39.75
  -2  -2 -21   14.01   23.02
  -2   2 -22  175.35   69.49
   2   2 -22  133.98   47.53
  -2  -2 -22   46.92   38.98
  -2   2 -23   29.32   30.39
  -2  -3   0   27.09   22.24
   2   3   0   11.63   23.49
  -2   3   0   -2.68   20.32
   2  -3   0   16.95   20.27
   2   3   1  704.83   35.11
   2  -3  -1  834.14   32.47
  -2   3  -1  743.39   33.56
   2   3  -1  859.64   43.78
  -2   3   1  759.01   30.61
  -2  -3  -1  861.54   36.73
   2  -3   1  729.82   34.67
   2   3   2 8434.62  223.35
  -2   3  -2 8282.80  208.12
  -2  -3   2 7920.69  199.52
   2  -3  -2 7769.49  186.55
   2   3  -2 8712.96  221.03
  -2  -3  -2 8240.34  221.95
  -2   3   2 8480.41  202.78
   2  -3   2 7832.62  200.70
   2   3   3 3364.67  116.06
  -2   3  -3 3119.02   97.20
  -2  -3   3 3031.71   93.37
   2  -3  -3 3083.49   75.51
   2   3  -3 3190.98  103.41
  -2  -3  -3 3018.43  100.30
   2  -3   3 3201.48   96.28
  -2   3  -4 2680.25   87.19
  -2  -3   4 2637.34   85.34
   2   3  -4 2665.50   87.85
  -2  -3  -4 2443.09   75.11
   2  -3   4 2511.62   82.32
  -2   3  -5 1760.00   68.82
  -2  -3   5 1921.08   73.04
   2   3  -5 2004.97   93.77
  -2  -3  -5 1963.70   62.55
   2  -3   5 2057.83   74.26
  -2   3  -6  173.74   43.98
  -2  -3   6   91.96   21.56
   2   3  -6   75.52   27.51
  -2  -3  -6  154.93   35.37
   2  -3   6  104.25   23.87
  -2  -3   7 1653.87   68.70
  -2   3  -7 1738.00   83.66
   2   3  -7 1819.08   80.88
   2  -3   7 1986.38   76.36
  -2  -3  -7 2031.10   71.59
   2  -3  -8 1621.89   34.54
  -2  -3   8 1713.58   60.19
  -2   3  -8 1430.53   69.35
   2   3  -8 1473.16   62.55
   2  -3   8 1578.74   65.92
  -2  -3  -8 1800.42   68.35
  -2  -3   9  316.47   69.09
   2  -3  -9  245.64   30.41
  -2   3  -9  336.11   76.74
   2   3  -9  329.71   64.87
   2  -3   9  190.91   56.92
  -2  -3  -9  198.90   65.98
  -2  -3  10  980.14  104.69
   2  -3 -10  807.30   40.31
  -2   3 -10 1016.56  143.20
   2   3 -10  845.28   67.14
   2  -3  10  805.73  136.40
  -2   3 -11  704.57   56.67
   2  -3 -11  651.48   38.37
  -2  -3  11  640.38   86.36
   2   3 -11  798.69  163.11
  -2  -3 -11  799.64   72.35
   2  -3  11  621.32  140.46
  -2  -3  12   35.75   25.30
   2  -3 -12    2.38    8.06
  -2   3 -12   -7.49   27.83
   2   3 -12   49.71   26.06
  -2  -3 -12   22.58   21.53
   2  -3  12   19.98   13.91
   2  -3 -13  609.61   31.94
  -2   3 -13  697.63  170.11
  -2  -3  13  547.50  135.56
   2   3 -13  585.09   60.95
  -2  -3 -13  535.79   81.12
   2  -3 -14 1286.64   53.00
  -2   3 -14 1276.51   71.76
  -2  -3  14 1286.14  186.51
   2   3 -14 1418.62   90.44
  -2  -3 -14 1316.27  108.56
   2  -3 -15    8.20    9.35
  -2   3 -15   22.37   30.10
   2   3 -15   30.30   17.95
  -2  -3 -15   11.59   13.18
   2  -3 -16  972.49   88.72
  -2   3 -16  987.77   86.99
   2   3 -16 1056.45   73.12
  -2  -3 -16 1212.99   80.92
   2  -3 -17  147.40   56.33
  -2   3 -17  155.59   64.36
   2   3 -17  160.99   53.12
  -2  -3 -17  200.98   57.43
   2  -3 -18   -2.01   11.47
  -2   3 -18   30.94   24.01
   2   3 -18   83.32   38.30
  -2  -3 -18   22.44   29.18
   2  -3 -19  107.16   55.92
  -2   3 -19  150.33   71.15
   2   3 -19   94.15   47.10
  -2  -3 -19   80.15   41.90
  -2   3 -20  142.24   60.26
  -2  -3 -20   45.34   35.39
  -2   3 -21  105.85   49.71
   2   3 -21  214.94   99.64
  -2  -3 -21   86.11   53.59
  -2   3 -22  313.77   73.94
  -2   3 -23    5.91   23.40
   2   3 -23   49.18   38.85
   2   4   021416.41  509.74
  -2  -4   020985.80  496.63
  -2   4   021357.41  501.38
   2  -4   020542.65  485.30
   2   4   1 3726.53  113.17
  -2   4  -1 3944.05  109.27
  -2  -4   1 3479.43  108.22
   2  -4  -1 3557.12   97.50
   2   4  -1 3597.01  114.28
  -2   4   1 3586.32  102.06
  -2  -4  -1 3683.68  108.12
   2  -4   1 3579.55  100.36
   2   4   2   31.78   31.92
  -2   4  -2   -9.22   18.05
  -2  -4   2   48.00   33.25
   2  -4  -2   -0.21   11.09
  -2  -4  -2   27.92   22.16
  -2   4   2   -0.36    9.45
   2   4  -2   64.46   28.64
   2  -4   2   30.40   21.12
   2   4   312508.24  312.63
  -2   4  -311917.29  298.71
  -2  -4   312295.52  305.15
   2  -4  -311798.98  276.43
  -2  -4  -312635.80  307.62
  -2   4   312164.53  286.05
   2   4  -312036.06  302.10
   2  -4   312584.28  309.83
   2   4   4 1623.95   62.07
  -2   4  -4 1418.27   63.12
  -2  -4   4 1500.10   77.40
   2  -4  -4 1608.02   44.04
   2   4  -4 1445.80   97.11
  -2  -4  -4 1546.36   84.10
   2  -4   4 1628.16   65.89
  -2   4  -5 1069.67   59.76
   2  -4  -5  930.00   24.64
  -2  -4   5 1130.80   55.47
  -2  -4  -5  966.53   43.56
   2   4  -5 1060.14   59.47
   2  -4   5  956.71   50.41
  -2   4  -6 3232.30  117.71
  -2  -4   6 3173.54  105.39
   2   4  -6 3322.75  127.13
  -2  -4  -6 3166.63  106.82
   2  -4   6 3380.94  114.14
  -2   4  -7  442.55   88.71
  -2  -4   7  443.96   89.88
   2   4  -7  355.70   38.51
  -2  -4  -7  457.69   76.70
   2  -4   7  464.98   82.13
  -2  -4   8 1298.80  116.51
  -2   4  -8 1220.23   60.11
   2   4  -8 1232.92   70.61
  -2  -4  -8 1174.45   50.49
   2  -4   8 1186.00   60.97
  -2  -4  -8 1283.42   54.23
  -2  -4   9  229.76   71.48
  -2   4  -9  198.36   60.48
   2   4  -9  373.84   79.33
  -2  -4  -9  234.52   51.21
   2  -4   9  176.98   56.33
  -2  -4  -9  196.94   46.68
  -2  -4  10  753.44  166.15
   2  -4 -10  785.54   30.75
  -2   4 -10  712.73   65.52
   2   4 -10  695.02   56.30
   2  -4  10  718.68   54.48
  -2  -4 -10  744.27   83.04
   2  -4 -11 1017.41   54.82
  -2  -4  11  891.12  161.26
   2  -4 -11 1161.27   57.27
  -2   4 -11 1223.86  158.48
   2   4 -11  991.21   83.55
  -2  -4 -11 1135.06   70.25
   2  -4  11 1050.22   73.47
  -2   4 -12  105.59   35.34
   2  -4 -12   92.29   31.14
  -2  -4  12  139.04   28.55
   2   4 -12   97.06   44.90
  -2  -4 -12   83.75   35.61
   2  -4 -13  804.49   32.08
  -2   4 -13  769.70   63.63
   2   4 -13  728.58   55.58
  -2  -4 -13  847.92   98.57
   2  -4 -14   53.20   15.64
  -2   4 -14   23.86   33.68
   2   4 -14   33.01   33.85
  -2  -4 -14   31.91   29.32
   2  -4 -15    3.22    9.11
  -2   4 -15   81.44   36.79
   2   4 -15   90.92   39.64
  -2  -4 -15   61.63   31.42
   2  -4 -16  559.81   58.09
  -2   4 -16  444.09  173.11
   2   4 -16  608.20   75.55
  -2  -4 -16  448.07   46.99
   2  -4 -17  404.08   71.48
  -2   4 -17  434.18  110.87
   2   4 -17  496.10  133.76
  -2  -4 -17  435.77   87.90
   2  -4 -18  387.47   83.54
  -2   4 -18  506.03   63.63
   2   4 -18  396.60  116.03
  -2  -4 -18  260.82  138.73
  -2   4 -19   48.28   44.74
   2   4 -19  148.63   57.79
  -2  -4 -19   39.16   34.42
  -2   4 -20  355.84  109.00
   2   4 -20  165.96   99.32
  -2  -4 -20  219.26   99.30
  -2   4 -21   -9.64   31.33
   2   4 -21   -1.12   30.08
  -2  -4 -21   12.99   16.27
   2   4 -22   57.22   45.94
  -2   4 -23   20.98   22.92
  -2  -5   0   55.08   31.25
  -2   5   0   21.49   26.40
   2  -5   0   13.42   10.57
   2   5   1 2627.71  129.01
   2  -5  -1 2700.21   80.34
  -2   5  -1 2596.51   83.27
  -2  -5   1 2612.74   87.93
   2   5  -1 2606.38   93.93
  -2  -5  -1 2574.78   86.59
   2  -5   1 2694.12   86.14
  -2   5   1 2623.18   79.53
   2   5   2 7813.45  201.40
  -2   5  -2 7583.80  198.43
  -2  -5   2 7777.01  206.31
   2  -5  -2 7630.35  196.33
  -2  -5  -2 8174.42  212.29
  -2   5   2 7286.11  184.35
   2   5  -2 7426.65  201.59
   2  -5   2 7493.58  197.09
   2   5   3  336.81   58.86
  -2  -5   3  387.69   46.33
   2  -5  -3  348.04   30.02
  -2   5  -3  366.68   48.48
  -2  -5  -3  402.74   84.54
   2   5  -3  426.74   47.72
  -2   5   3  401.56   51.58
   2  -5   3  405.08  113.48
   2   5   4 2537.93   90.09
  -2  -5   4 2358.40  102.56
  -2   5  -4 2111.89   96.86
   2  -5  -4 2331.09   64.23
  -2  -5  -4 2255.14   92.32
  -2   5   4 2432.27   69.36
   2   5  -4 2457.67  102.11
   2  -5   4 2343.20   81.93
   2   5   5 2079.02   75.25
  -2  -5   5 1974.85   87.06
   2  -5  -5 1825.21   52.72
  -2   5  -5 2059.33   81.88
  -2   5   5 1998.77   58.11
  -2  -5  -5 1891.85   86.78
   2   5  -5 1895.89  106.80
   2  -5   5 2010.84   82.91
  -2   5  -6  504.62   76.55
   2  -5  -6  474.28   35.16
  -2  -5   6  476.60   50.71
  -2  -5  -6  514.95   55.88
   2   5  -6  641.47  101.89
   2  -5   6  672.63  144.40
  -2   5  -7 4366.94  115.75
  -2  -5   7 4496.10  116.04
   2   5  -7 4196.95  111.45
  -2  -5  -7 4549.90  104.16
   2  -5   7 4446.95  114.54
  -2   5  -8  624.99   64.79
  -2  -5   8  558.51  107.33
   2   5  -8  496.65   44.28
  -2  -5  -8  588.88   53.91
   2  -5   8  531.05   41.23
  -2   5  -9   61.11   29.53
  -2  -5   9  199.38   37.07
   2   5  -9  171.73   55.45
  -2  -5  -9  142.22   30.30
   2  -5   9  146.40   28.65
  -2  -5  -9  194.66   48.63
  -2   5 -10 2800.56  123.90
  -2  -5  10 2486.92  145.03
   2   5 -10 2654.62  122.41
  -2  -5 -10 2920.56  115.14
   2  -5  10 2796.69  120.15
  -2  -5 -10 2727.64  104.81
  -2   5 -11  352.32   80.98
  -2  -5  11  350.29   84.56
   2   5 -11  376.51   99.59
  -2  -5 -11  280.29   72.94
  -2  -5 -11  332.72   42.13
  -2   5 -12  841.82   88.04
  -2  -5 -12  899.79  239.94
   2   5 -12  877.64  231.19
  -2  -5 -12  941.86   66.94
   2  -5 -13  159.92   27.10
   2  -5 -13  163.79   19.90
  -2   5 -13  163.73   36.52
   2   5 -13  334.81   74.34
  -2  -5 -13  130.80   43.77
  -2   5 -14   24.81   32.59
   2  -5 -14   32.88    9.55
   2   5 -14   47.94   35.56
  -2  -5 -14   19.22   19.48
  -2  -5 -14   26.51   17.67
  -2   5 -15  751.62  178.33
   2  -5 -15  690.28   34.80
   2   5 -15  808.02  137.52
  -2  -5 -15  543.06  128.37
  -2  -5 -15  740.42  113.46
   2  -5 -16  467.78   49.36
  -2   5 -16  315.60   92.06
  -2  -5 -16  461.60   99.55
   2  -5 -17   29.81   10.04
  -2   5 -17   65.99   44.71
   2   5 -17   70.35   44.46
  -2  -5 -17   16.39   17.05
  -2   5 -18   57.14   41.32
   2   5 -18   32.88   27.60
  -2  -5 -18   30.34   23.09
  -2   5 -19   21.36   30.14
   2   5 -19   45.87   38.56
  -2   5 -20   40.01   31.97
   2   5 -20   17.29   33.82
  -2  -5 -20   22.25   17.32
  -2   5 -21   12.00   32.08
   2   5 -21  158.32   62.39
  -2   5 -22  615.80   86.91
   2   5 -22  548.24   77.97
   2   6   011823.59  321.78
  -2  -6   011536.85  294.60
  -2   6   011856.90  298.61
   2  -6   011908.02  298.54
   2   6   1  586.48   54.30
   2  -6  -1  509.26   44.24
  -2  -6   1  652.49   62.06
   2   6  -1  651.64   69.89
  -2   6   1  566.68   60.77
  -2  -6  -1  643.23   63.45
   2  -6   1  578.88   52.04
   2   6   2  817.12   74.86
  -2  -6   2  923.36   54.76
  -2   6  -2  695.98   65.70
   2  -6  -2  835.77   36.52
  -2   6   2  954.89   46.94
   2   6  -2  704.37   65.66
   2  -6   2  814.24   68.61
  -2  -6  -2  983.14   67.55
  -2  -6   3 5264.00  172.43
  -2   6  -3 5285.15  159.77
   2  -6  -3 5447.40  141.79
   2   6  -3 5063.36  159.72
  -2  -6  -3 5329.14  164.09
  -2   6   3 5324.06  142.46
   2  -6   3 5606.68  160.23
   2   6   4 1592.77   67.10
  -2  -6   4 1873.19   81.44
  -2   6  -4 1841.25   87.14
   2  -6  -4 1727.42   54.03
  -2  -6  -4 1671.47   88.70
  -2   6   4 1671.26   56.43
   2   6  -4 1840.40   88.28
   2  -6   4 1777.94   71.83
   2   6   5   91.46   26.62
  -2  -6   5   79.78   31.88
  -2   6  -5   73.74   27.25
   2  -6  -5   77.32   21.13
  -2   6   5   92.33   24.59
  -2  -6  -5   93.88   30.54
   2   6  -5   89.54   46.80
   2  -6   5   81.67   27.86
  -2  -6   6 3707.54  115.19
  -2   6  -6 3989.35  109.10
   2  -6  -6 3832.88   75.68
  -2   6   6 3898.25   72.80
  -2  -6  -6 3856.34  101.72
   2   6  -6 3882.44  139.90
   2  -6   6 4070.66  108.91
  -2  -6   7  141.43   30.51
   2  -6  -7  184.53   20.24
  -2   6  -7  160.33   34.88
  -2  -6  -7  167.50   37.81
   2   6  -7  207.65   38.01
  -2  -6   8 5730.93  260.04
   2  -6  -8 5977.47  235.09
  -2   6  -8 6106.67  265.74
  -2  -6  -8 6336.61  268.14
   2   6  -8 6065.58  278.19
   2  -6   8 6221.53  276.42
  -2  -6   9    2.39   12.31
  -2   6  -9   12.37   23.06
   2   6  -9   41.81   39.33
  -2  -6  -9   14.65   14.28
   2  -6   9   12.67   16.20
  -2   6 -10   95.71   31.35
  -2  -6 -10  151.38   49.31
   2   6 -10  184.58   43.60
  -2  -6 -10  153.99   34.60
  -2   6 -11    3.08   20.62
  -2  -6 -11    1.42    9.79
   2   6 -11   -0.41   26.21
  -2  -6 -11    2.71   10.05
  -2   6 -12  159.40   45.17
  -2  -6 -12  137.55   44.94
   2   6 -12  232.91   68.22
  -2  -6 -12  195.53   60.80
  -2   6 -13 1322.32  110.55
  -2  -6 -13 1502.03   91.10
   2   6 -13 1440.90  114.37
  -2  -6 -13 1391.51   86.34
  -2   6 -14  269.86   58.02
   2   6 -14  241.70   66.56
  -2  -6 -14  259.55   95.22
  -2   6 -15   38.18   35.23
  -2  -6 -15   10.12   12.93
   2   6 -15   20.09   21.10
  -2  -6 -15   12.19   19.45
  -2   6 -16    4.17   31.73
   2   6 -16   16.22   21.08
  -2  -6 -16   19.87   14.04
  -2   6 -17  122.43   48.80
   2   6 -17   89.45   52.36
  -2  -6 -17   61.52   29.58
  -2   6 -18  302.04   64.57
   2   6 -18  281.44  135.02
  -2  -6 -18  227.84   96.10
  -2   6 -19   95.36   52.26
   2   6 -19   33.66   48.34
  -2  -6 -19    6.41   17.72
  -2   6 -20  230.03   94.89
   2   6 -20  113.68   90.40
  -2   6 -21   61.48   47.14
   2   6 -21   -4.62   30.73
  -2   6 -22   44.57   41.99
   2   6 -22   39.14   33.51
   2   7   0   16.70   27.09
  -2   7   0   39.07   30.87
  -2  -7   0   29.97   25.17
   2  -7   0   30.53   22.04
   2   7   1 3307.77  109.67
  -2  -7   1 3349.93   99.68
  -2   7  -1 3063.41   94.56
   2  -7  -1 3237.78   80.66
   2   7  -1 3517.21  108.73
  -2  -7  -1 3092.05   94.88
  -2   7   1 3159.78   86.00
   2  -7   1 3150.59   83.32
   2   7   2 1155.09   72.08
  -2   7  -2 1262.33   54.53
  -2  -7   2 1460.45   79.27
   2  -7  -2 1428.89   48.30
  -2   7   2 1349.31   51.42
   2   7  -2 1364.66   72.69
   2  -7   2 1241.27   54.36
   2   7   3  146.06   84.14
  -2  -7   3  136.82   27.82
  -2   7  -3  176.77   33.02
   2  -7  -3  157.73   46.23
  -2   7   3  152.84   23.30
  -2  -7  -3  120.82   17.25
   2   7  -3  120.19   37.58
   2  -7   3  119.81   30.27
   2   7   4  152.55   45.61
  -2  -7   4  115.41   25.79
  -2   7  -4  162.08   34.75
   2  -7  -4  148.85   34.82
  -2  -7  -4  170.07   25.92
   2   7  -4  160.27   35.38
  -2   7   4  151.22   24.65
   2  -7   4  155.44   30.02
   2   7   5 1632.64   99.27
  -2   7  -5 1784.05  102.76
   2  -7  -5 1697.99   88.49
   2   7  -5 1412.67   92.86
  -2   7   5 1702.01   77.62
  -2  -7  -5 1638.35   86.05
   2  -7   5 1478.91  106.98
   2   7   6  717.29   53.70
  -2   7  -6  645.82   52.37
  -2  -7   6  818.70  166.43
   2  -7  -6  831.28   47.08
  -2   7   6  765.53   43.36
  -2  -7  -6  769.29   63.17
   2   7  -6  658.73   75.19
   2  -7   6  752.87   57.49
  -2  -7   7   44.02   28.95
  -2   7  -7    1.55   25.77
   2  -7  -7   16.09    8.30
  -2   7   7   18.49    6.85
  -2  -7  -7   16.92   17.75
   2   7  -7  112.12   42.58
   2  -7   7   41.64   28.34
   2  -7  -8  374.32   65.47
  -2   7  -8  289.90   63.83
   2   7  -8  613.41   93.07
  -2  -7  -8  380.12   96.98
   2  -7  -9  188.32   13.63
  -2   7  -9  258.59   50.85
   2   7  -9  215.64   42.92
  -2  -7  -9  164.90   55.25
  -2   7 -10 1024.87  139.52
  -2  -7 -10  921.43   64.06
   2   7 -10  789.00   52.60
  -2   7 -11  233.52   62.73
  -2  -7 -11  225.68   90.85
   2   7 -11  235.52   65.39
  -2  -7 -11  334.20   63.52
  -2   7 -12   56.04   37.95
  -2  -7 -12   25.55   21.30
   2   7 -12   17.65   19.73
  -2  -7 -12    7.51   10.60
  -2   7 -13  423.11   73.26
  -2  -7 -13  330.82   63.95
   2   7 -13  451.90  105.21
  -2  -7 -13  317.05   96.58
  -2   7 -14 1912.33  153.49
  -2  -7 -14 1714.91  112.47
   2   7 -14 1455.12  113.69
  -2   7 -15  140.76   58.55
  -2  -7 -15   73.31   25.89
   2   7 -15  129.73   50.82
  -2  -7 -15   88.01   48.64
  -2   7 -16  308.55   63.86
   2   7 -16  449.17   66.39
  -2  -7 -16  347.69   73.23
  -2   7 -17  323.43   64.05
   2   7 -17  196.83   50.17
  -2  -7 -17  270.48   41.25
  -2   7 -18  162.82  107.92
   2   7 -18  195.09   38.79
  -2  -7 -18  287.55   62.25
  -2   7 -19   49.85   49.36
   2   7 -19   67.47   44.73
  -2   7 -20   34.10   47.75
   2   7 -20   -3.09   30.34
  -2   7 -21   87.07   40.11
   2   7 -21   80.67   60.61
  -2   7 -22   32.83   55.06
   2   7 -22  158.31   74.22
   2   8   0 9156.66  382.63
  -2  -8   0 8453.42  352.02
  -2   8   0 8886.04  367.45
   2  -8   0 9042.92  373.88
   2   8   1   28.97   26.71
  -2  -8   1   55.10   34.97
  -2   8  -1   88.30   27.73
   2  -8  -1   74.34   20.96
  -2   8   1   85.79   29.46
  -2  -8  -1  145.22   49.25
   2  -8   1  102.13   36.32
   2   8  -1  193.02   53.95
   2   8   2 6305.08  303.66
   2  -8  -2 6918.02  286.65
  -2   8  -2 6202.11  286.41
  -2  -8   2 7361.68  316.98
  -2   8   2 6823.34  289.78
   2   8  -2 6874.55  299.06
   2  -8   2 7219.50  303.98
  -2  -8  -2 7346.54  311.18
   2   8   3  456.93   79.62
  -2   8  -3  335.11   47.01
  -2  -8   3  368.55   38.44
   2  -8  -3  338.81   66.09
  -2  -8  -3  238.92   79.38
  -2   8   3  279.79   30.39
   2  -8   3  244.23   32.39
   2   8   4  120.00   28.38
  -2   8  -4   74.82   21.66
  -2  -8   4   56.90   21.90
   2  -8  -4  132.19   36.66
   2   8  -4  218.43   38.81
  -2  -8  -4  133.19   26.42
  -2   8   4  139.36   25.75
   2  -8   4  143.75   39.18
   2   8   5  475.70   43.55
  -2  -8   5  406.51   82.14
  -2   8  -5  415.85   78.41
   2  -8  -5  449.76   34.91
  -2   8   5  454.70   59.70
   2   8  -5  495.69   64.09
  -2  -8  -5  475.52   42.70
   2  -8   5  421.03  103.10
   2   8   6  197.54   55.25
  -2   8  -6  227.21   57.06
   2  -8  -6  163.31   34.42
   2   8  -6  170.44   51.05
  -2   8   6  173.23   39.00
  -2  -8  -6  213.31   27.12
   2  -8   6  185.24   53.45
   2   8   7  319.69   81.38
  -2   8  -7  278.22   45.80
   2  -8  -7  263.20   42.46
   2   8  -7  275.34   49.76
  -2   8   7  306.60   42.33
  -2  -8  -7  248.44   26.89
   2  -8  -8   43.01   14.87
  -2   8  -8  139.79   49.32
   2   8  -8   61.51   37.57
  -2  -8  -8   49.25   19.92
  -2   8  -9  103.40   35.87
   2  -8  -9  186.56   21.95
   2   8  -9  276.23   54.85
  -2   8 -10 2345.16  131.11
  -2  -8 -10 2398.92   96.97
   2   8 -10 2251.71  115.03
  -2   8 -11   39.48   33.14
  -2  -8 -11   62.13   21.20
   2   8 -11   41.89   42.91
  -2   8 -12 1251.36   97.02
  -2  -8 -12 1194.75   72.04
   2   8 -12 1178.07   99.23
  -2  -8 -12 1182.23   65.74
  -2   8 -13   42.45   39.52
   2   8 -13   26.80   33.07
  -2  -8 -13   13.47   11.70
  -2   8 -14 2245.96  144.26
  -2  -8 -14 2335.77  133.00
   2   8 -14 2300.23  145.35
  -2  -8 -14 2250.86  122.13
  -2   8 -15   38.82   37.53
   2   8 -15  133.49   51.13
  -2  -8 -15   36.81   15.38
  -2   8 -16   52.34   39.29
   2   8 -16  153.15   53.94
  -2  -8 -16   93.15   36.46
  -2   8 -17   32.20   35.60
   2   8 -17   24.15   41.86
  -2   8 -18   90.57   54.35
   2   8 -18  109.98   47.36
  -2   8 -19   55.60   38.57
   2   8 -19  109.52   63.93
  -2   8 -20  -25.94   36.40
   2   8 -20   48.38   29.11
  -2   9   0   22.92   27.30
   2  -9   0    9.19    9.17
   2   9   1 2967.15  148.05
   2  -9  -1 3272.21  124.99
  -2   9  -1 3199.54  132.27
  -2  -9   1 3420.65  144.64
  -2  -9  -1 3230.05  132.56
   2   9  -1 3248.53  141.64
   2  -9   1 3239.87  132.51
  -2   9   1 3098.51  124.54
   2   9   2 1511.28  121.97
   2  -9  -2 1423.76   64.28
  -2  -9   2 1606.80   92.93
  -2   9  -2 1538.00   85.67
  -2   9   2 1589.31   78.04
   2   9  -2 1494.65   90.49
   2  -9   2 1542.71   82.33
  -2  -9  -2 1476.45   77.87
   2   9   3 1476.33   90.23
  -2  -9   3 1424.05   84.67
  -2   9  -3 1517.86   85.42
   2  -9  -3 1239.86   82.66
   2   9  -3 1336.31   80.16
  -2  -9  -3 1372.89   65.43
  -2   9   3 1424.95   69.40
   2  -9   3 1532.42   78.64
   2   9   4  744.73   55.60
  -2   9  -4  744.04   58.35
   2  -9  -4  801.58   50.68
  -2  -9  -4  810.92  102.23
  -2   9   4  818.08   53.91
   2  -9   4  697.24  126.03
   2   9  -4  859.14   83.14
   2   9   5  755.05   54.29
  -2   9  -5  830.15  134.07
   2  -9  -5  782.38   33.13
   2   9  -5  668.56   67.11
  -2   9   5  798.13   42.13
  -2  -9  -5  790.41   52.45
   2   9   6  108.87   38.71
   2  -9  -6   69.77   26.04
  -2   9  -6  142.30   37.07
  -2  -9  -6   96.95   32.63
  -2   9   6   63.78   26.16
   2   9   7  704.13   40.62
   2  -9  -7  895.83  229.07
  -2   9  -7  859.16  229.66
   2   9  -7  898.54  266.77
  -2  -9  -7  907.91  236.38
  -2   9  -8  680.82   74.50
   2  -9  -8  736.27   30.05
  -2  -9  -8  697.29   50.11
  -2   9   8  656.03   28.00
   2   9  -8  771.23  123.77
   2  -9  -9  936.30   66.56
  -2   9  -9  738.99   78.98
  -2  -9  -9  828.79   54.43
   2   9  -9  897.02   80.91
   2  -9 -10  425.82   60.37
   2  -9 -10  448.87   61.98
  -2   9 -10  414.87  160.34
  -2  -9 -10  461.61   50.76
   2   9 -10  657.62   99.28
  -2   9 -11  150.34   52.78
  -2  -9 -11   82.65   23.24
   2   9 -11  129.90   51.93
  -2   9 -12 1148.08  112.02
  -2  -9 -12 1035.00   87.03
   2   9 -12 1022.92  134.76
  -2  -9 -12 1199.02   89.72
  -2   9 -13  991.68  104.51
  -2  -9 -13  821.90   92.09
   2   9 -13  938.89  253.85
  -2  -9 -13 1088.94   71.43
  -2   9 -14  323.37   53.58
   2   9 -14  364.54  128.08
  -2  -9 -14  411.46   52.05
  -2   9 -15  604.87  143.96
   2   9 -15  561.85  208.24
  -2  -9 -15  508.05  104.72
  -2   9 -16  719.01  101.56
   2   9 -16  424.50  175.29
  -2  -9 -16  504.91  121.60
  -2   9 -17  149.11   56.03
   2   9 -17  101.09   60.96
  -2   9 -18   24.18   35.81
   2   9 -18   21.70   24.43
  -2   9 -19  106.99   52.26
   2   9 -19  247.37  105.91
  -2   9 -20   -4.98   47.28
   2   9 -20   75.66   47.92
   2  10   0   41.89   30.35
  -2  10   0   89.02   43.83
  -2 -10   0    7.62   15.37
   2 -10   0   14.13   14.10
  -2  10  -1  311.06   68.11
   2  10   1  288.11   98.08
   2 -10  -1  281.40   81.11
  -2  10   1  360.80  103.57
  -2 -10  -1  208.37   63.02
   2 -10   1  259.20   84.81
   2  10  -1  218.81   36.04
   2  10   2 2717.07  145.95
  -2  10  -2 2521.84  146.09
   2 -10  -2 2244.94  125.23
   2  10  -2 2881.36  176.34
  -2  10   2 2362.20  127.79
   2 -10   2 2165.93  119.51
  -2 -10  -2 2530.42  136.91
   2  10   3   32.44   30.21
   2 -10  -3   34.69   14.39
  -2  10  -3   10.26   39.22
  -2  10   3   58.86   29.83
  -2 -10  -3   37.57   29.55
   2  10  -3   16.59   25.98
   2  10   4 3199.92  197.08
   2 -10  -4 3032.68  177.50
  -2  10  -4 2945.78  192.51
   2  10  -4 3334.73  209.88
  -2  10   4 3349.15  194.60
   2  10   5   27.92   19.90
   2 -10  -5   15.61   13.38
  -2  10  -5    0.45   26.01
   2  10  -5   17.66   28.30
  -2  10   5   35.13   20.60
   2  10   6 4917.22  206.64
   2 -10  -6 4983.69  148.22
  -2  10  -6 4823.27  187.88
   2  10  -6 5046.53  193.16
  -2 -10  -6 4739.08  158.21
   2  10   7  173.47   58.40
   2 -10  -7   82.55   54.30
  -2  10  -7  158.97   45.93
   2  10  -7  252.27   54.67
  -2 -10  -7   89.61   56.26
  -2  10  -8 2922.33  185.96
   2 -10  -8 3153.01  164.59
  -2 -10  -8 3041.18  172.89
  -2  10   8 3392.51  182.55
   2  10  -8 3196.81  195.48
   2 -10  -9  417.72   24.55
  -2  10  -9  335.20  128.94
  -2 -10  -9  433.60   69.39
   2  10  -9  512.24  124.87
   2 -10 -10 1209.91   49.68
  -2  10 -10 1197.58   90.11
  -2 -10 -10 1345.18   81.77
   2  10 -10 1481.44  109.96
  -2  10 -11   90.75   83.50
   2  10 -11  228.21   77.00
  -2  10 -12   42.68   41.03
  -2 -10 -12   22.90   30.04
   2  10 -12   74.41   42.43
  -2  10 -13  114.96   54.21
   2  10 -13   62.84   36.40
  -2 -10 -13   80.26   38.84
  -2  10 -14  384.55  138.67
   2  10 -14  448.10  144.40
  -2 -10 -14  542.02  125.65
  -2  10 -15   72.12   31.68
   2  10 -15   33.43   29.76
  -2 -10 -15   13.27   13.67
  -2  10 -16  909.98  203.87
   2  10 -16  963.70  213.09
  -2  10 -17   66.59   53.26
   2  10 -17   64.49   56.97
  -2  10 -18  339.15  207.92
   2  10 -18  310.56  197.46
  -2  10 -19   90.79   52.82
   2  10 -19   48.92   53.51
  -2  10 -20  553.15  151.07
   2  10 -20  327.92  180.66
   2  11   0   13.33   24.09
   2 -11   0   -4.92   20.68
   2  11   1 3219.49  132.97
   2 -11  -1 3196.07  116.28
  -2  11  -1 3398.36  130.60
  -2  11   1 3363.67  129.10
   2  11  -1 3082.05  150.72
   2  11   2  742.19   60.21
   2 -11  -2  615.99  119.22
  -2  11  -2 1020.64   87.21
  -2  11   2  871.43   71.52
   2  11  -2  677.49   63.53
   2  11   3  636.18  144.78
   2 -11  -3  591.08   91.23
  -2  11  -3  558.73  129.08
  -2  11   3  615.27   63.15
  -2 -11  -3  422.17  138.20
   2  11  -3  703.86   73.85
   2  11   4 1005.34  192.39
  -2  11  -4  854.10   73.19
   2 -11  -4  896.69   49.64
  -2 -11  -4  693.79   65.65
  -2  11   4  798.93   46.25
   2  11  -4  703.14   63.69
   2  11   5  672.71  144.01
   2 -11  -5  571.63  126.40
  -2  11  -5  770.01  159.84
   2  11  -5  647.42   75.99
  -2  11   5  781.65   54.63
   2  11   6   55.91   33.41
  -2  11  -6  170.46   55.83
   2 -11  -6   24.20   16.11
  -2 -11  -6  122.17   35.27
  -2  11   6   35.10   28.13
   2  11  -6  129.23   41.34
   2  11   7  211.08   83.22
   2 -11  -7  274.94   37.52
  -2  11  -7  286.72   64.90
  -2  11   7  316.69   61.15
  -2 -11  -7  265.34   39.31
   2  11  -7  328.49   59.08
   2  11   8  389.95  157.06
  -2  11  -8  352.80   60.94
   2 -11  -8  295.04  100.74
  -2 -11  -8  271.27  113.39
  -2  11   8  390.08   37.83
   2  11  -8  588.63   86.78
  -2  11  -9   15.36   27.02
   2 -11  -9   11.89    6.88
   2  11  -9   43.48   37.42
   2 -11 -10  527.66   71.63
  -2  11 -10  466.83   88.10
   2  11 -10  767.89   91.01
  -2 -11 -10  325.28  124.18
  -2  11 -11  257.46   67.49
   2 -11 -11  309.69   31.76
   2  11 -11  268.74   96.41
  -2  11 -12  246.63   53.28
   2  11 -12  255.85   79.07
  -2  11 -13  790.44   98.43
   2  11 -13  842.06   98.53
  -2 -11 -13  828.47   74.68
  -2  11 -14   18.31   34.55
   2  11 -14   64.35   49.40
  -2 -11 -14   15.47   18.08
  -2  11 -15  638.55  180.26
   2  11 -15  464.12  240.72
  -2  11 -16  194.56  147.11
  -2  11 -17  362.28   67.56
   2  11 -17  264.51  124.24
  -2  11 -18  126.97   53.10
   2  11 -18   71.87   62.00
  -2  11 -19  161.43   63.91
   2  11 -19  117.61   69.70
   2  12   0 5836.75  349.67
  -2  12   0 6345.57  808.54
  -2  12  -1   88.26   35.60
   2  12   1   79.99   40.77
  -2  12   1  135.30   41.39
   2  12  -1   43.99   29.20
  -2  12  -2 2774.64  167.55
   2  12   2 2686.13  171.61
   2 -12  -2 2462.28  146.41
  -2  12   2 2722.41  164.01
   2  12  -2 2707.97  177.86
   2  12   3   41.50   28.58
   2 -12  -3   19.26   14.64
  -2  12  -3   29.64   37.44
   2  12  -3   13.60   29.93
  -2  12   3   21.74   20.92
   2  12   4  882.55   61.25
   2 -12  -4  684.20   45.55
  -2  12  -4  864.17   83.76
   2  12  -4  768.21   69.69
  -2  12   4  865.01   59.02
   2  12   5   48.34   32.24
   2 -12  -5   13.85   17.25
  -2  12  -5   -1.36   27.78
   2  12  -5   70.49   44.69
  -2  12   5    9.49   12.53
   2  12   6  410.75  106.92
   2 -12  -6  217.46   73.39
  -2  12  -6  426.45   91.57
   2  12  -6  402.33   63.83
  -2  12   6  337.62   76.73
   2  12   7   46.13   15.62
   2 -12  -7   13.82   19.27
  -2  12  -7  111.66   62.20
   2  12  -7   72.72   50.68
  -2  12   7   35.86   25.21
  -2  12  -8   80.39   26.43
   2  12   8   17.88   27.28
   2 -12  -8    5.13    7.25
   2  12  -8  109.17   52.06
  -2  12   8    9.64   12.40
  -2  12  -9  313.03   88.51
  -2  12   9  142.60   65.44
   2  12  -9  302.59   68.49
  -2 -12  -9  121.67   69.52
  -2  12 -10 1337.28  134.46
   2  12 -10 1217.79  123.69
  -2  12 -11    2.40   37.03
   2  12 -11  114.33   56.99
  -2  12 -12 1922.61  139.22
   2  12 -12 2288.52  153.25
  -2  12 -13   86.43   56.53
   2  12 -13   18.22   25.24
  -2 -12 -13   32.61   26.48
  -2  12 -14  541.31   72.30
   2  12 -14  587.14  179.92
  -2  12 -15   55.91   57.95
   2  12 -15   87.57   58.20
  -2  12 -16  121.96   77.84
   2  12 -16  124.02   54.24
  -2  12 -17   29.53   42.84
   2  12 -17   96.89   57.29
  -2  12 -18   54.99   58.49
   2  12 -18   77.37   69.11
   2  13   0   19.93   30.15
  -2  13   0   73.05   39.93
   2  13   1   40.90   27.20
  -2  13  -1   34.36   38.89
   2  13  -1   40.59   44.38
  -2  13   1   31.85   35.39
  -2  13  -2  348.65  114.40
   2  13   2  240.33  116.28
  -2  13   2  306.59   50.18
   2  13  -2  248.49   79.20
   2  13   3  516.55  109.47
  -2  13  -3  328.58   77.43
  -2  13   3  456.82   59.40
   2  13  -3  469.18   73.40
   2  13   4   17.68   30.20
  -2  13  -4   28.11   25.42
  -2  13   4   42.05   23.17
   2  13  -4  134.50   55.77
   2  13   5  407.69  110.95
   2 -13  -5  214.09  114.11
  -2  13  -5  484.52  177.76
   2  13  -5  607.97   91.53
  -2  13   5  519.53  129.31
   2  13   6   45.88   30.84
   2 -13  -6   11.62   17.82
  -2  13  -6   74.93   67.99
   2  13  -6  133.86   74.73
  -2  13   6   46.79   33.83
   2  13   7  640.04  189.98
  -2  13  -7  603.10  177.70
   2 -13  -7  379.69   49.65
   2  13  -7  593.00   86.05
  -2  13  -8  113.45   52.21
   2  13   8  105.03   31.10
   2  13  -8  186.01   63.93
  -2  13   8   58.24   28.91
  -2  13  -9  130.44   47.09
  -2  13   9  105.17   55.57
   2  13  -9  132.80   52.36
  -2  13 -10  371.59  134.85
   2  13 -10  456.09   72.81
   2  13 -11  171.02   52.06
  -2  13 -12    2.83   44.42
   2  13 -12    4.68   35.27
   2  13 -13  116.52   68.09
  -2  13 -14  216.19  139.29
   2  13 -14  249.40   70.39
  -2  13 -15   49.08   44.31
   2  13 -15   24.08   57.81
  -2  13 -16  112.80   57.11
   2  13 -16  273.15   62.42
  -2  13 -17   26.19   49.44
   2  13 -17  139.80   74.35
   2  14   0  305.99   66.77
  -2  14   0  392.61   71.85
   2  14   1  250.33   55.66
  -2  14  -1  267.13   78.40
   2  14  -1  241.52   74.20
  -2  14   1  144.25   44.98
   2  14   2   98.66   46.79
  -2  14  -2  160.82   59.83
   2  14  -2   33.30   23.84
  -2  14   2  111.12   44.97
   2  14   3   50.45   32.66
  -2  14  -3   67.03   33.87
   2  14  -3   17.07   33.28
  -2  14   3  -15.35   22.24
   2  14   4  874.96   89.74
  -2  14  -4 1126.85  108.73
  -2  14   4  818.80  150.07
   2  14  -4 1026.66  103.70
   2  14   5   72.32   41.08
  -2  14  -5   70.53   49.15
  -2  14   5   68.26   38.66
   2  14  -5  224.80   70.32
   2  14   6 1467.03  128.35
  -2  14  -6 1699.25  152.94
  -2  14   6 1789.11  157.93
   2  14  -6 1510.35  141.70
   2  14   7   47.59   24.94
  -2  14  -7   27.07   38.66
  -2  14   7    4.71   14.37
   2  14  -7   39.48   36.11
   2  14   8  488.17  196.74
  -2  14  -8  676.02  172.34
  -2  14  -9   68.08   47.34
   2  14  -9  129.30   82.10
  -2  14 -10  351.87   82.93
   2  14 -10  320.51   95.44
  -2  14 -11  126.62   60.25
   2  14 -11   10.09   39.54
  -2  14 -12   13.57   29.84
   2  14 -12  -10.01   36.50
  -2  14 -13   83.59   36.95
   2  14 -13  119.73   68.40
  -2  14 -14    4.43   41.45
   2  14 -14   44.47   40.50
  -2  14 -15   15.82   38.99
   2  14 -15   27.79   43.57
   2  15   0  -16.71   28.77
  -2  15   0    2.27   28.21
   2  15   1  122.27   39.11
  -2  15  -1  142.92   53.49
   2  15  -1  136.61   52.18
  -2  15   1  132.49   55.58
   2  15   2  145.89   40.59
  -2  15  -2   32.16   28.98
   2  15  -2   76.86   35.22
  -2  15   2   87.71   41.94
   2  15   3   26.83   32.78
  -2  15  -3   16.58   33.00
  -2  15   3   56.03   32.66
   2  15  -3   50.08   43.15
   2  15   4  817.90  154.79
  -2  15  -4  537.83  223.26
   2  15  -4  757.23  104.26
  -2  15   4  736.28   71.74
  -2  15  -5  141.17   63.13
   2  15   5  185.37   46.38
   2  15  -5  117.00   56.98
  -2  15   5  100.08   39.08
   2  15   6   17.65   29.04
  -2  15  -6   60.91   38.96
  -2  15   6   37.39   33.41
   2  15  -6   34.65   51.29
   2  15   7  214.80   93.28
  -2  15  -7  230.07  119.31
  -2  15   7  165.38   60.04
   2  15  -7  341.16   90.69
   2  15   8   49.63   25.00
  -2  15  -8  113.42   56.41
   2  15  -8  246.91   78.51
  -2  15  -9   79.57   54.62
   2  15  -9   41.79   40.42
  -2  15 -10  540.18  100.27
   2  15 -10  374.30   86.02
  -2  15 -11   18.13   36.81
   2  15 -11   45.61   43.91
  -2  15 -12  188.89   79.21
   2  15 -12  172.98   68.58
  -2  15 -13  111.10   97.11
   2  15 -13  135.78   75.58
   2  15 -14   53.85   62.73
   2  16   0  483.33  140.35
  -2  16   0  374.64   92.47
  -2  16  -1    5.35   31.79
   2  16   1   57.47   30.10
   2  16  -1   26.09   31.30
  -2  16   1   37.43   31.15
   2  16   2   36.17   19.84
  -2  16  -2  136.02   60.95
  -2  16   2   53.54   31.44
   2  16  -2   39.38   36.98
   2  16   3   70.49   30.72
  -2  16  -3   91.42   57.63
  -2  16   3   15.80   18.79
   2  16  -3   69.34   38.01
   2  16   4  456.23  121.37
  -2  16  -4  413.79   84.51
   2  16  -4  452.28   97.72
  -2  16   4  418.23  136.49
  -2  16  -5  199.12   69.86
   2  16   5   76.15   35.51
   2  16  -5   91.57   52.77
  -2  16   5  148.19   35.29
   2  16   6  267.82  111.22
  -2  16  -6  277.17  125.22
  -2  16   6  223.30   84.45
   2  16  -6  294.20   78.79
   2  16   7   16.11   30.65
  -2  16  -7   22.72   36.00
   2  16  -7   35.81   49.17
   2  16   8  138.90   93.24
  -2  16  -8  129.74   86.90
   2  16  -8  187.99   54.76
   2  16   9   24.53   24.03
  -2  16  -9  -10.23   51.33
   2  16  -9   51.15   38.23
  -2  16 -10   15.06   38.95
   2  16 -10   70.67   45.90
  -2  16 -11   63.88   52.71
   2  16 -11   99.05   73.08
  -2  16 -12   98.11   57.82
   2  16 -12  127.00   67.69
   2  17   0   47.45   32.87
  -2  17   0   27.27   36.13
   2  17   1   19.80   16.62
  -2  17  -1   53.13   37.22
   2  17  -1   81.03   30.12
  -2  17   1   50.52   30.77
   2  17   2  246.79   70.33
  -2  17  -2  374.16   73.47
   2  17  -2  251.65   64.10
  -2  17   2  244.26   66.40
   2  17   3  175.25   54.18
  -2  17  -3  208.67   79.19
   2  17  -3  163.76   64.98
   2  17   4  391.76  123.19
  -2  17  -4  408.68   83.83
  -2  17   4  368.88  129.16
   2  17  -4  335.01   81.39
   2  17   5   46.94   29.32
  -2  17  -5   58.07   58.89
   2  17  -5   35.13   31.19
   2  17   6  149.93   69.12
  -2  17  -6  175.37   80.87
   2  17  -6  113.03   68.14
   2  17   7    1.74   26.35
  -2  17  -7  -31.95   39.04
  -2  17  -8  167.45   78.86
   2  17  -8  104.71   58.91
  -2  17  -9  134.37   61.49
   2  17  -9   87.57   60.95
   2  18   0 1219.85  101.86
  -2  18   0 1202.24  191.44
   2  18   1   51.31   35.28
  -2  18  -1   55.55   54.55
  -2  18   1   37.56   19.76
   2  18  -1   71.32   51.85
   2  18   2  415.82  147.06
  -2  18  -2  461.60   66.86
   2  18  -2  547.05  210.12
   2  18   3  170.33   67.99
  -2  18  -3  111.34   56.76
  -2  18   3   75.13   40.84
   2  18   4   73.91   48.59
   2  18  -4   53.22   40.09
  -2  18  -5   53.12   50.94
   2  18  -5   31.78   33.92
  -2  18  -6   44.21   61.18
   2  18  -6   82.02   45.48
  -3   0   1   -3.09   13.93
   3   0  -2  319.95   28.39
  -3   0   2  447.14   58.44
  -3   0  -2  366.86   35.58
   3   0  -3    5.79   13.53
  -3   0   3   14.14   16.25
  -3   0  -3   38.01   15.57
   3   0  -4  340.18   32.02
  -3   0   4  355.75   33.60
  -3   0  -4  367.56   55.50
   3   0  -5   10.71   11.22
  -3   0   5   -0.11   11.24
  -3   0  -5   29.66   24.59
   3   0   5   26.31   22.05
   3   0  -6 2256.36   72.51
  -3   0   6 2384.10   72.56
  -3   0  -6 2318.81   80.84
   3   0   6 2285.15   83.24
   3   0  -7   19.67   14.14
  -3   0   7   12.51    6.60
  -3   0  -7   53.46   22.07
   3   0   7   -0.28   16.98
   3   0  -8 1882.34   65.96
  -3   0   8 1894.94   64.22
  -3   0  -8 1903.99   81.45
   3   0   8 1882.91   75.83
   3   0  -9   21.36   16.19
  -3   0   9   15.96   13.89
  -3   0  -9   45.97   21.12
   3   0   9   23.24   12.49
   3   0 -10   35.12   18.32
  -3   0  10   67.61   26.54
  -3   0 -10   17.77   21.87
   3   0  10   16.26   10.99
   3   0 -11   -1.58   13.99
  -3   0 -11   22.07   23.98
  -3   0  11   14.82    7.51
   3   0  11   17.52   14.05
   3   0 -12  701.42   76.81
  -3   0  12  677.38   48.06
  -3   0 -12  972.75  145.45
   3   0  12  846.66  122.75
   3   0 -13   14.02   15.94
  -3   0  13   14.78   14.86
  -3   0 -13   35.81   38.22
   3   0  13   22.00   16.33
   3   0 -14 3019.09  113.44
  -3   0 -14 2994.68  126.53
  -3   0  14 2960.96  105.72
  -3   0 -15   34.63   23.77
   3   0 -16  685.75   91.76
  -3   0 -16  777.38   63.14
  -3   0  16  547.44   94.35
   3   0 -17   14.38   16.84
  -3   0 -17   -0.78   16.64
   3   0 -18  272.47   51.46
  -3   0 -18  280.35   75.17
   3   0 -19   25.68   21.46
  -3   0 -19   58.47   32.13
  -3   0 -20  -10.37   31.41
  -3   0 -21   -6.69   32.77
  -3   0 -22  174.73   95.54
  -3   0 -23   15.80   18.50
  -3  -1   030312.72 2079.17
   3   1   030653.12 2103.89
  -3   1   024223.95 1661.83
  -3   1  -110199.44  250.07
  -3  -1   110307.24  256.15
   3   1  -110732.33  265.62
  -3  -1  -110466.47  254.61
  -3   1  -2 4097.27  113.99
  -3  -1   2 3973.71  109.39
  -3   1   2 4294.57  108.07
   3  -1   2 4426.17  118.91
   3   1  -2 3968.08  120.27
   3  -1  -3 7526.64  182.39
  -3   1  -3 8005.52  216.91
  -3  -1   3 7512.14  188.56
   3   1  -3 8128.22  202.95
  -3   1   3 8088.62  192.93
   3  -1   3 8479.50  213.14
  -3   1  -4  242.66   61.40
  -3  -1   4  181.20   45.69
  -3   1   4  189.31   22.61
   3   1  -4  196.77   54.08
   3  -1   4  243.62   68.42
  -3  -1  -4  228.92   58.10
   3  -1  -5 1529.70   46.91
  -3   1  -5 1515.63   70.12
  -3  -1   5 1517.09   58.65
  -3   1   5 1531.77   50.38
   3   1  -5 1489.91   59.11
  -3  -1  -5 1584.03   91.13
   3  -1   5 1488.10   56.86
   3  -1  -6   10.04    7.98
  -3   1  -6   91.65   38.32
  -3  -1   6    7.79   10.56
  -3   1   6   22.16   14.50
   3   1  -6   25.27   22.37
  -3  -1  -6   13.28   26.32
   3  -1   6   24.59   26.55
   3  -1  -7 1127.38   45.56
  -3  -1   7 1024.87   44.75
  -3   1  -7 1047.97   62.42
   3   1  -7 1019.34   51.08
  -3   1   7  994.66   35.75
   3  -1   7  983.19   56.23
  -3  -1  -7 1052.98   98.15
   3  -1  -8  224.32   28.25
  -3   1  -8  233.99   44.90
  -3  -1   8  206.08   28.18
  -3   1   8  207.20   29.22
   3   1  -8  269.58   51.89
  -3  -1  -8  251.12   60.86
   3  -1   8  212.69   37.50
   3  -1  -9  167.71   35.61
  -3  -1   9  126.32   35.17
  -3   1  -9   87.94   32.07
   3   1  -9  114.10   31.39
  -3   1   9  118.99   22.24
  -3  -1  -9  132.08   40.01
   3  -1   9  129.98   27.29
   3  -1 -10  698.85   42.23
  -3  -1  10  855.47   51.62
  -3   1 -10  791.37   57.46
  -3   1  10  711.10   42.78
  -3  -1 -10  828.54   76.99
   3  -1  10  815.98   85.61
  -3   1 -11  396.88  131.14
   3  -1 -11  431.84   51.79
  -3  -1  11  451.49   40.10
   3   1 -11  391.15   74.04
  -3   1  11  456.61   60.94
  -3  -1 -11  415.90   79.46
   3  -1  11  443.24   64.18
  -3  -1  12 2569.08  136.55
   3  -1 -12 2848.59  138.48
  -3   1 -12 2771.29  151.07
  -3  -1 -12 2849.47  153.82
   3   1 -12 2559.86  129.77
  -3   1  12 2833.35  136.59
   3  -1  12 2546.15  141.66
   3  -1 -13   15.11   12.88
  -3   1 -13   29.32   25.00
  -3  -1  13   15.76   15.06
   3   1 -13   30.09   26.75
  -3  -1 -13   21.77   20.77
  -3   1  13   22.50   13.94
   3  -1  13   19.50   14.07
   3  -1 -14  830.67  115.94
  -3  -1  14  731.52   67.31
  -3   1 -14  835.18   90.39
   3   1 -14  904.46   90.15
  -3  -1 -14 1049.71  130.27
  -3   1  14  850.41   46.56
   3  -1 -15  131.34   32.69
  -3  -1  15  104.39   32.52
  -3   1 -15  103.64   35.12
  -3  -1 -15   87.04   37.82
   3   1 -15  128.05   38.92
  -3   1  15   73.25   27.94
   3  -1 -16   -2.99   15.25
  -3  -1  16    3.33   19.47
  -3   1 -16   65.99   36.70
  -3  -1 -16   64.39   29.55
   3   1 -16   17.60   28.98
  -3   1  16   12.17   12.72
  -3   1 -17   17.71   35.44
   3  -1 -17   25.26   14.67
  -3  -1  17   15.42   21.38
  -3  -1 -17   -5.19   27.60
   3   1 -17   60.14   36.58
  -3   1  17   -5.07   14.26
   3  -1 -18  190.08   36.50
  -3   1 -18   55.86   33.14
   3   1 -18  133.99   54.31
  -3  -1 -18  133.26   50.05
   3  -1 -19    4.61   19.19
  -3   1 -19   53.49   25.93
   3   1 -19   54.14   44.53
  -3  -1 -19   19.17   22.89
   3  -1 -20   76.37   42.13
  -3   1 -20   79.83   49.70
   3   1 -20   65.77   48.30
  -3   1 -21   41.86   38.75
  -3  -1 -21   58.24   25.42
  -3   1 -22    8.58   18.10
  -3  -1 -22   15.97   32.67
  -3   1 -23   34.91   32.05
  -3  -1 -23   23.78   16.13
  -3  -2   0   -6.91   19.07
   3   2   0   13.32   12.86
  -3   2   0   10.33   14.46
   3  -2   0   11.59   19.82
   3   2   1  734.57   38.01
  -3   2  -1  724.45   44.20
  -3  -2   1  709.85   33.94
   3  -2  -1  743.33   30.52
   3   2  -1  742.14   85.67
   3  -2   1  701.57   33.25
  -3   2   1  678.29   34.51
  -3  -2  -1  731.55   53.95
  -3   2  -2 8759.77  220.95
  -3  -2   2 9029.99  225.20
   3   2  -2 8738.54  234.76
  -3  -2  -2 9697.65  247.58
  -3   2   2 9113.63  216.09
   3  -2   2 9132.65  228.12
  -3  -2   3 4080.32  115.92
  -3   2  -3 4419.97  127.89
   3   2  -3 4470.35  127.27
  -3  -2  -3 4512.63  139.61
  -3   2   3 4317.34  106.27
   3  -2   3 4400.83  125.06
  -3   2   3 4289.94  105.73
  -3   2  -4   96.97   30.83
  -3  -2   4  172.87   38.96
   3   2  -4  128.04   27.78
  -3   2   4  111.12   24.33
   3  -2   4  113.62   22.46
  -3  -2   5 1825.84   63.80
   3   2  -5 1857.56   78.05
  -3   2   5 1798.57   47.23
   3  -2   5 1984.25   71.24
  -3   2  -6  820.14   85.22
  -3  -2   6  672.25   60.22
  -3   2   6  769.09   56.74
   3   2  -6  772.38   68.68
   3  -2   6  774.70   66.27
  -3  -2  -6  751.70   65.03
   3  -2  -7 1810.54   52.10
  -3  -2   7 2060.69   79.35
  -3   2  -7 1928.58   80.67
   3   2  -7 1876.89   74.99
  -3   2   7 1845.99   51.88
   3  -2   7 1735.10   77.10
  -3  -2  -7 1836.49   80.29
   3  -2  -8 2591.94   55.79
  -3  -2   8 2580.77   77.75
  -3   2  -8 2630.88   88.79
   3   2  -8 2446.64   75.25
  -3   2   8 2615.96   53.17
   3  -2   8 2586.69   81.73
  -3  -2  -8 2419.88   84.34
   3  -2  -9   67.45   15.84
  -3  -2   9   83.11   24.14
  -3   2  -9  108.87   26.68
   3   2  -9  139.21   39.46
  -3   2   9  102.82   24.68
  -3  -2  -9   44.78   15.26
   3  -2   9   61.30   17.83
   3  -2 -10 1378.62   75.42
  -3  -2  10 1333.20   75.60
  -3   2 -10 1420.31   95.60
   3   2 -10 1352.20   78.15
  -3  -2 -10 1386.40   93.27
  -3   2  10 1440.27   65.67
   3  -2  10 1514.92   84.53
   3  -2 -11  226.99   23.45
  -3  -2  11  196.62   38.39
  -3   2 -11  245.50   65.12
   3   2 -11  170.15   27.84
  -3  -2 -11  265.07   63.03
  -3   2  11  158.81   22.17
   3  -2  11  184.59   38.87
   3  -2 -12    6.16    5.09
  -3  -2  12  -23.96   17.75
  -3   2 -12   75.60   32.78
   3   2 -12    8.78   19.16
  -3  -2 -12   34.63   21.62
  -3   2  12    5.59    9.92
   3  -2  12    3.69   20.75
   3  -2 -13  269.22   34.87
  -3   2 -13  383.96   60.08
  -3  -2  13  242.55   40.49
   3   2 -13  316.79   90.30
  -3  -2 -13  301.55   82.50
  -3   2  13  261.13   47.31
   3  -2 -14  601.14   95.21
  -3  -2  14  555.29   62.93
  -3   2 -14  558.46  120.95
  -3  -2 -14  606.88  134.01
   3   2 -14  515.79   93.41
  -3   2  14  543.81   55.49
   3  -2 -15    6.86   10.23
  -3  -2  15   39.21   32.02
  -3   2 -15   37.89   29.96
  -3  -2 -15   82.69   50.59
   3   2 -15    1.20   19.53
  -3   2  15   17.87   13.72
   3  -2 -16  951.04   55.99
  -3   2 -16  886.87  215.15
  -3  -2  16  544.54  143.14
   3   2 -16 1049.71   90.35
  -3  -2 -16  821.35  116.61
  -3   2  16  832.45   61.79
   3  -2 -17  229.49   62.11
  -3   2 -17  309.53  114.06
   3   2 -17  347.43   58.49
  -3  -2 -17  250.93  105.94
   3  -2 -18  128.33   39.03
  -3   2 -18   75.69   39.77
   3   2 -18  135.91   42.31
  -3  -2 -18  102.34   42.07
  -3   2 -19   61.59   71.45
   3   2 -19  223.56   58.28
  -3  -2 -19   83.30   47.76
  -3   2 -20   57.54   35.24
   3   2 -20  114.69   44.67
  -3  -2 -20  117.75   58.75
  -3   2 -21   61.99   56.30
  -3  -2 -21  134.48   62.99
  -3   2 -22  209.69  101.76
   3   2 -22  197.54   84.60
  -3  -2 -22  135.97  113.19
  -3   2 -23    9.56   37.62
   3   3   014438.82  360.19
  -3  -3   013878.04  343.09
  -3   3   013587.98  325.45
   3  -3   013744.26  329.28
   3  -3  -1  100.97   28.34
   3   3   1  116.80   29.22
  -3   3  -1  167.58   48.49
  -3  -3   1   90.44   22.65
  -3   3   1  152.32   44.19
   3   3  -1  135.68   33.40
   3  -3   1  143.75   36.81
  -3  -3  -1  170.57   39.22
   3   3   243450.52 2979.77
  -3   3  -241614.17 2857.27
  -3  -3   242940.36 2944.22
   3   3  -243817.51 3006.73
  -3  -3  -245811.51 3140.87
   3  -3   242632.70 2923.47
  -3   3  -3  230.86   66.12
  -3  -3   3  154.70   23.88
  -3  -3  -3  171.50   36.23
  -3   3   3  124.39   17.46
   3   3  -3  113.91   31.82
   3  -3   3  199.93   50.13
  -3  -3   4 6007.51  164.84
  -3   3  -4 5303.71  165.72
   3   3  -4 5554.38  155.98
  -3  -3  -4 5730.18  155.20
  -3   3   4 5586.17  131.86
   3  -3   4 5886.41  161.43
  -3   3  -5   70.92   21.97
  -3  -3   5  124.13   28.33
   3   3  -5   65.37   24.29
  -3  -3  -5  120.93   39.86
   3  -3   5   79.58   21.23
  -3   3  -612560.67  324.75
  -3  -3   613178.13  330.31
   3   3  -611932.57  304.59
  -3  -3  -613033.69  328.03
   3  -3   611664.58  301.51
  -3  -3   7   13.06   19.26
  -3   3  -7   33.43   27.12
   3   3  -7   26.86   24.05
   3  -3   7   56.02   24.43
  -3  -3  -7   30.56   21.25
  -3  -3   8 3408.93   95.42
  -3   3  -8 3206.02  104.55
   3   3  -8 3507.66   98.70
   3  -3   8 3595.19  100.20
  -3  -3   9  114.68   25.67
  -3   3  -9  104.66   67.30
   3   3  -9   87.76   28.44
  -3  -3  -9   95.84   36.75
  -3  -3  10 3920.91  175.33
  -3   3 -10 3789.22  182.44
   3   3 -10 3866.35  177.54
   3  -3  10 3537.47  174.06
  -3  -3 -10 3978.91  178.20
   3  -3 -11  116.12   16.09
  -3   3 -11   65.70   39.62
  -3  -3  11   77.93   24.37
   3   3 -11   83.38   27.21
   3  -3  11   51.59   27.47
  -3  -3 -11  113.22   34.76
   3  -3 -12  148.86   29.00
  -3   3 -12  186.63   41.61
  -3  -3  12  103.42   38.00
   3   3 -12  159.62   34.98
  -3  -3 -12  134.50   37.52
   3  -3 -13   40.54   18.86
  -3   3 -13   63.52   28.23
  -3  -3 -13   87.71   27.01
   3  -3 -14 2297.82   75.84
  -3   3 -14 2219.13  109.46
  -3  -3  14 2083.61  126.41
   3   3 -14 2359.23  101.17
  -3  -3 -14 2603.39  120.89
   3  -3 -15   -3.20    6.93
  -3   3 -15   20.02   39.19
   3   3 -15   34.76   32.68
  -3  -3 -15   49.31   40.77
  -3   3 -16   48.74   23.86
   3   3 -16  115.20   55.27
  -3  -3 -16  147.46   65.65
   3  -3 -17    4.85    5.42
  -3   3 -17   33.82   21.64
   3   3 -17   59.54   32.21
  -3  -3 -17   31.80   15.47
   3  -3 -18  877.92   66.84
  -3   3 -18  828.53  104.43
   3   3 -18  892.80   83.47
  -3  -3 -18  728.49  151.22
  -3   3 -19   38.41   31.34
  -3   3 -20  333.37  121.39
  -3  -3 -20  288.97  149.49
  -3   3 -21  -14.01   32.94
   3   3 -21    5.23   20.06
  -3  -3 -21   34.69   27.95
  -3   3 -22   65.45   47.21
   3   3 -22   95.74   47.57
  -3  -3 -22   71.14   34.58
   3   4   0   20.79   19.90
  -3  -4   0   10.19   25.83
  -3   4   0   57.75   21.82
   3  -4   0   16.92   18.81
   3   4   1 2076.56   92.30
  -3   4  -1 1793.38   68.12
  -3  -4   1 1929.80   74.40
   3  -4  -1 1936.39   59.96
   3   4  -1 2049.32   74.22
  -3   4   1 1896.59   60.60
   3  -4   1 2133.42   71.58
  -3  -4  -1 1995.75  112.10
  -3   4  -212007.42  298.17
  -3  -4   211502.77  289.61
   3  -4  -211945.91  283.89
   3   4  -212030.59  302.14
  -3   4   211729.94  279.07
  -3  -4  -212284.25  308.70
   3  -4   211652.44  293.48
  -3  -4   3 6371.06  173.42
   3  -4  -3 6456.50  159.67
  -3  -4  -3 6280.79  188.22
   3   4  -3 6531.80  182.66
  -3   4   3 6299.88  157.71
   3  -4   3 6532.53  177.41
  -3   4  -4 5099.58  147.13
  -3  -4   4 5017.28  143.72
   3  -4  -4 4732.43  116.91
   3   4  -4 4869.54  147.61
  -3  -4  -4 5000.67  144.81
   3  -4   4 5049.85  145.71
  -3   4  -511431.11  297.74
   3   4  -510753.58  285.26
   3  -4   511227.04  297.17
  -3   4  -6  295.32   45.70
  -3  -4   6  515.17   70.87
   3   4  -6  449.85   53.52
  -3  -4  -6  528.20  121.61
   3  -4   6  572.70  120.84
  -3  -4   7 1615.30  104.39
  -3   4  -7 1653.38   67.75
   3  -4   7 1659.31   69.90
  -3   4  -8   49.36   22.76
  -3  -4   8   23.18   31.79
   3   4  -8   17.40   19.66
  -3  -4  -8   31.90   17.46
   3  -4   8   28.43   12.97
  -3  -4  -8   57.66   19.10
  -3   4  -9 2067.47  167.93
  -3  -4   9 1954.56   99.01
   3   4  -9 1805.82  102.96
  -3  -4  -9 1802.12   92.11
  -3  -4  -9 2053.67  102.86
  -3   4 -10 1637.67   87.42
  -3  -4  10 1585.70   77.38
   3   4 -10 1390.14   85.70
   3  -4  10 1524.92  212.24
  -3  -4 -10 1641.46   79.88
  -3   4 -11 1114.09   85.57
  -3  -4  11 1017.63  102.24
   3   4 -11 1111.87   82.61
  -3  -4 -11 1142.55  107.87
  -3  -4  12 1085.90  201.20
  -3   4 -12 1051.20  125.22
   3   4 -12 1209.10  144.97
  -3  -4 -12 1186.74  158.60
   3  -4 -13  832.92   27.79
  -3   4 -13  856.49  198.16
   3   4 -13  811.25  125.91
  -3  -4 -13  749.31   91.91
  -3   4 -14  167.17   53.19
   3   4 -14  231.23   57.30
  -3  -4 -14  304.58   48.73
  -3   4 -15   28.21   27.31
   3   4 -15   44.84   27.88
  -3  -4 -15   34.64   22.33
  -3   4 -16 1292.38  114.53
   3   4 -16 1211.25  168.29
  -3  -4 -16 1227.88   98.33
  -3   4 -17  334.67  131.64
   3   4 -17  711.19   75.02
  -3  -4 -17  413.54  137.63
  -3   4 -18  340.91  143.17
   3   4 -18  325.81  140.96
  -3  -4 -18  189.72   90.84
  -3   4 -19  282.30  118.20
   3   4 -19  286.47  148.38
  -3  -4 -19  287.15  153.75
  -3   4 -20   55.40   28.11
   3   4 -20   14.15   27.98
  -3  -4 -20   78.03   43.67
  -3   4 -21  165.11   61.32
   3   4 -21   94.99   54.59
  -3  -4 -21   77.10   44.61
  -3   4 -22  369.57   82.62
   3   4 -22  106.07   67.28
   3   5   0 9172.00  252.73
  -3  -5   0 9182.91  236.64
  -3   5   0 8906.79  237.51
   3  -5   0 8913.86  226.57
   3   5   1  279.81   61.78
  -3   5  -1  305.42   88.11
  -3  -5   1  295.84   40.85
   3  -5  -1  236.84   52.30
   3   5  -1  282.31   75.93
  -3   5   1  237.34   76.60
   3  -5   1  301.13   86.23
  -3  -5  -1  247.40   36.10
   3   5   211584.83  327.29
   3   5  -211929.30  306.08
   3  -5   211730.67  310.35
   3   5   3  851.01   47.30
   3  -5  -3  802.97   61.60
  -3   5  -3  785.06   67.75
  -3  -5   3  861.55   51.55
  -3  -5  -3  902.87   47.11
   3   5  -3  845.63   49.60
   3  -5   3  833.67   40.94
  -3   5   3  882.96   48.26
   3   5   4 5108.92  148.76
  -3  -5   4 5253.17  173.05
  -3   5  -4 5123.99  151.78
   3  -5  -4 5135.15  128.78
  -3   5   4 5099.85  129.83
   3   5  -4 5180.29  165.60
   3  -5   4 5121.12  152.05
  -3  -5  -4 5270.42  149.70
  -3   5  -5 1359.11   66.20
  -3  -5   5 1291.12  117.48
   3  -5  -5 1195.59   36.85
   3   5  -5 1247.74   66.67
  -3  -5  -5 1329.76   73.93
   3  -5   5 1260.83   57.36
  -3   5  -6 2028.57   76.71
  -3  -5   6 2104.29   79.62
   3   5  -6 1976.58   75.97
  -3  -5  -6 2046.02   89.60
   3  -5   6 1974.13   81.80
  -3   5  -7   15.59   10.53
  -3  -5   7   20.34   22.73
   3   5  -7   21.78   25.64
  -3  -5  -7   37.11   23.41
   3  -5   7   22.25   21.15
  -3   5  -8  493.45   54.20
  -3  -5   8  422.60  111.70
   3   5  -8  518.13  113.93
  -3  -5  -8  460.24   31.46
   3  -5   8  411.68   41.34
  -3   5  -9   97.42   38.66
  -3  -5   9   30.52   21.57
   3   5  -9   22.74   33.36
  -3  -5  -9   40.13   18.02
   3  -5   9   61.29   26.92
  -3  -5  -9   45.48   17.00
  -3   5 -10 4752.04  235.63
  -3  -5 -10 5070.84  247.81
   3   5 -10 5038.86  249.97
  -3  -5 -10 4843.44  228.25
  -3  -5  11  112.06   28.67
  -3   5 -11  105.06   51.86
   3   5 -11  196.38   58.79
  -3  -5 -11  103.36   35.26
  -3  -5 -11  160.83   25.34
  -3   5 -12 6040.81  355.33
  -3  -5 -12 5809.22  334.00
   3   5 -12 5801.13  335.78
  -3  -5 -12 5848.91  328.07
  -3   5 -13 1520.33  213.30
  -3  -5 -13 1290.58  101.18
   3   5 -13 1456.78   95.77
  -3  -5 -13 1350.25   66.92
  -3   5 -14 1790.94  156.20
  -3  -5 -14 1807.98  113.77
   3   5 -14 1599.35  114.71
  -3  -5 -14 1677.52  113.55
  -3   5 -15   29.79   42.73
  -3  -5 -15   28.36   26.81
   3   5 -15   67.12   48.01
  -3   5 -16   37.33   33.46
  -3  -5 -16   42.56   30.33
   3   5 -16  164.60   66.13
  -3  -5 -16  103.38   42.91
  -3   5 -17   76.90   44.10
   3   5 -17   75.33   42.04
  -3  -5 -17   40.41   25.21
  -3   5 -18  210.99   73.41
   3   5 -18  100.88   48.50
  -3  -5 -18   83.16   47.40
  -3   5 -19   49.97   45.30
   3   5 -19   20.27   28.40
  -3  -5 -19    8.16   27.16
  -3   5 -20   69.23   47.62
   3   5 -20  151.53   57.80
  -3  -5 -20   73.85   59.34
  -3   5 -21   23.44   17.77
   3   5 -21   18.99   21.53
  -3   5 -22  108.86   42.95
   3   5 -22   83.33   83.33
   3   6   0   22.09   30.61
  -3  -6   0   18.56   20.62
  -3   6   0   14.19   17.58
   3  -6   0   -0.20   16.88
   3   6   1  101.35   47.34
   3  -6  -1  168.18   35.66
  -3  -6   1  156.91   35.86
  -3   6  -1  123.74   21.38
  -3  -6  -1  131.16   23.61
   3   6  -1   81.25   49.98
   3  -6   1  115.22   32.34
  -3   6   1  187.01   51.74
   3   6   2 1909.77  117.80
  -3   6  -2 2212.41   83.44
  -3  -6   2 2130.91   93.62
   3  -6  -2 2101.14   67.96
   3   6  -2 2007.32  134.01
  -3   6   2 2121.07   79.23
  -3  -6  -2 2164.84   84.71
   3  -6   2 2103.40   76.64
   3   6   3 9276.15  251.90
   3  -6  -3 9413.40  232.89
  -3   6  -3 9082.29  260.80
  -3   6   3 9235.06  235.85
  -3  -6  -3 9606.08  250.88
   3  -6   3 9394.50  248.66
   3   6   4 3671.86  137.45
  -3   6  -4 3491.68  105.86
  -3  -6   4 3530.59  109.35
   3  -6  -4 3586.26   73.24
  -3  -6  -4 3667.74   97.29
  -3   6   4 3695.14   77.52
   3   6  -4 3632.41  108.04
   3  -6   4 3601.28   99.93
   3   6   5 3117.45   98.32
  -3  -6   5 3039.57  146.26
  -3   6  -5 2915.04   92.94
   3  -6  -5 2754.97   60.58
  -3   6   5 2956.98   61.18
   3   6  -5 2830.90   93.61
   3  -6   5 3027.43   96.78
  -3  -6  -5 2994.08  106.92
  -3   6  -6  263.74   81.90
  -3  -6   6  247.91   41.06
   3  -6  -6  247.00   23.93
   3   6  -6  307.49   78.32
  -3  -6  -6  227.85   40.89
   3  -6   6  229.07   42.64
  -3   6  -7 4551.92  227.57
  -3  -6   7 5035.99  223.59
   3   6  -7 4984.44  227.40
  -3  -6  -7 4800.83  211.54
   3  -6   7 4963.66  220.66
  -3   6  -8  770.80  157.95
  -3  -6  -8  705.90   83.49
   3   6  -8  693.17   79.15
   3  -6   8  719.16   53.35
  -3   6  -9 3112.98  166.10
  -3  -6   9 2725.12  144.51
   3   6  -9 2453.15  155.81
  -3  -6  -9 3072.17  159.15
  -3   6 -10  770.44  132.40
  -3  -6 -10  414.14   80.93
   3   6 -10  695.03   66.06
  -3  -6 -10  676.43   43.16
  -3   6 -11 2051.98  139.70
  -3  -6 -11 2160.53  138.74
   3   6 -11 2201.56  147.49
  -3  -6 -11 1905.14  121.76
  -3   6 -12  912.08   93.59
  -3  -6 -12  809.39   50.02
   3   6 -12 1140.92   87.54
  -3  -6 -12  992.62   68.70
  -3   6 -13  154.07   59.52
  -3  -6 -13   50.97   28.67
   3   6 -13  152.96   60.90
  -3  -6 -13   44.97   23.56
  -3   6 -14  252.31   52.89
  -3  -6 -14  220.12   95.51
   3   6 -14  383.92  146.49
  -3  -6 -14  266.91   92.29
  -3   6 -15   63.11   42.63
  -3  -6 -15   41.79   30.58
   3   6 -15  127.72   60.61
  -3  -6 -15   89.34   31.85
  -3   6 -16  871.89   81.45
   3   6 -16 1145.23   97.91
  -3  -6 -16 1078.81   79.86
  -3   6 -17  113.34   53.19
   3   6 -17  172.28   56.89
  -3  -6 -17   66.99   43.78
  -3   6 -18  198.05   64.36
   3   6 -18  170.09   86.04
  -3  -6 -18   90.66   48.94
  -3   6 -19   75.98   55.71
   3   6 -19  179.84   68.36
  -3  -6 -19  128.79   43.78
  -3   6 -20    8.80   33.92
   3   6 -20   80.71   56.90
  -3   6 -21  193.48   55.94
   3   6 -21  131.43  101.78
  -3   6 -22  149.42   99.73
   3   7   0 2243.60   90.80
  -3  -7   0 2507.33   83.52
  -3   7   0 2244.94   76.87
   3  -7   0 2417.09   76.21
   3   7   1   35.44   19.08
  -3   7  -1   11.41   22.47
  -3  -7   1   31.35   29.79
   3  -7  -1    9.98    7.70
  -3  -7  -1   61.00   27.61
  -3   7   1   19.00   15.55
   3  -7   1   10.92   22.60
   3   7  -1   16.60   45.29
   3   7   2 1075.68   58.61
  -3  -7   2  986.84   55.16
  -3   7  -2  856.36   54.47
   3  -7  -2  922.79   39.87
  -3   7   2  899.04   40.87
  -3  -7  -2  895.86   49.07
   3  -7   2  973.52   48.22
   3   7  -2  869.63   55.89
   3   7   3   48.26   44.24
  -3   7  -3   71.11   35.59
   3  -7  -3   34.40    8.45
   3   7  -3   70.56   33.62
  -3  -7  -3    9.41   12.57
   3  -7   3   21.39   24.51
  -3   7   3   36.23   17.21
   3   7   4 4655.19  214.71
  -3   7  -4 4967.05  221.94
   3  -7  -4 4772.37  201.88
  -3   7   4 4778.48  198.69
  -3  -7  -4 5115.11  223.85
   3  -7   4 4807.84  211.31
   3   7  -4 4698.78  210.44
   3   7   5   45.20   25.11
  -3  -7   5   28.25   10.14
  -3   7  -5   50.04   30.83
   3  -7  -5   56.35   17.67
  -3  -7  -5   46.75   17.87
   3   7  -5   68.53   48.33
  -3   7   5   83.73   16.62
   3  -7   5   37.12   20.06
   3   7   610503.44  464.15
  -3  -7   611200.49  464.01
  -3   7  -6 9636.13  403.65
   3  -7  -610248.23  408.24
   3   7  -610081.33  423.74
  -3  -7  -610644.40  435.19
   3  -7   610246.86  427.63
  -3   7   610735.22  425.99
   3  -7  -7   36.02    8.02
  -3   7  -7   35.77   30.17
  -3  -7  -7   30.53   11.76
   3  -7   7  133.47   42.73
   3   7  -7   67.54   41.15
  -3   7  -8 5341.82  260.70
  -3  -7  -8 5420.78  269.19
   3   7  -8 5676.75  280.79
  -3   7  -9  285.08   45.82
  -3  -7  -9  204.83   61.02
   3   7  -9  299.08   78.38
  -3   7 -10 2756.51  175.37
  -3  -7 -10 2987.06  180.35
   3   7 -10 2750.24  185.98
  -3   7 -11  274.43   52.66
  -3  -7 -11  191.21   56.05
   3   7 -11  437.57   87.66
  -3  -7 -11  277.76   94.14
  -3   7 -12   45.42   33.98
   3   7 -12   -0.40   24.68
  -3  -7 -12   22.15   21.95
  -3   7 -13   86.59   27.60
   3   7 -13   38.55   39.27
  -3  -7 -13   69.81   34.82
  -3   7 -14  284.99   68.78
  -3  -7 -14  190.65  107.79
   3   7 -14  360.79  101.38
  -3  -7 -14  303.76   99.45
  -3   7 -15   87.13   49.06
   3   7 -15   42.64   38.06
  -3  -7 -15   51.56   28.10
  -3   7 -16  270.35   54.08
   3   7 -16  209.93   77.80
  -3  -7 -16  227.17   50.46
  -3   7 -17   76.98   40.08
   3   7 -17   90.06   32.69
  -3  -7 -17    5.17   20.83
  -3   7 -18  532.47  219.66
   3   7 -18  759.60   78.37
  -3  -7 -18  733.29   96.76
  -3   7 -19  133.50   65.15
   3   7 -19    0.28   23.75
  -3  -7 -19   15.42   16.79
  -3   7 -20  522.96   80.85
   3   7 -20  344.82  148.51
  -3   7 -21   21.09   41.71
   3   7 -21   91.91   36.72
   3   8   0    1.71   24.89
  -3  -8   0    5.71   41.42
  -3   8   0   55.03   29.65
   3  -8   0   11.71   18.09
  -3  -8   1 2350.01  119.99
   3   8   1 2260.14  115.02
  -3   8  -1 2387.59  120.73
   3  -8  -1 2380.42  113.56
  -3   8   1 2136.37  106.24
  -3  -8  -1 2242.98  113.55
   3   8  -1 2055.64  122.31
   3  -8   1 2403.72  115.23
   3   8   2  186.50   49.61
   3  -8  -2  237.63   70.14
  -3   8  -2  225.49   32.32
  -3   8   2  210.58   55.94
   3   8  -2  166.79   44.73
   3  -8   2  218.58   55.38
   3   8   3 1355.79   79.92
  -3  -8   3 1391.20   87.80
  -3   8  -3 1501.84   92.89
   3  -8  -3 1445.04   71.55
  -3   8   3 1525.41   79.98
  -3  -8  -3 1351.29   83.18
   3  -8   3 1317.00   77.77
   3   8  -3 1265.14   85.22
   3   8   4   57.23   36.87
  -3  -8   4   79.29   29.25
  -3   8  -4   39.85   36.30
   3  -8  -4   56.24   23.36
  -3   8   4   73.89   22.30
  -3  -8  -4   93.10   29.05
   3   8  -4  130.73   41.91
   3  -8   4   55.52   41.18
   3   8   5  277.81   78.73
  -3   8  -5  326.83   69.81
  -3  -8   5  274.83   40.93
   3  -8  -5  270.62   53.87
  -3   8   5  278.62   22.24
   3   8  -5  311.73   50.88
  -3  -8  -5  312.85   38.83
   3  -8   5  249.83   52.41
   3   8   6   22.46   22.39
   3  -8  -6   24.23   13.10
  -3   8  -6   -1.44   28.61
   3   8  -6   50.62   41.75
  -3   8   6    3.06    4.10
   3  -8  -7  358.92   18.44
  -3   8  -7  421.51   55.15
   3   8  -7  385.42   47.87
  -3  -8  -7  419.92   82.26
  -3   8  -8  623.73   53.02
   3  -8  -8  527.68   17.08
   3   8  -8  623.74   66.24
  -3   8  -9  231.62   45.70
   3   8  -9  192.99   38.84
  -3   8 -10 2966.36  141.11
  -3  -8 -10 2698.59  107.13
   3   8 -10 2782.58  134.89
  -3   8 -11  459.22   62.22
  -3  -8 -11  302.04  115.79
   3   8 -11  670.18   71.45
  -3   8 -12  300.04   45.21
  -3  -8 -12  169.44   81.31
   3   8 -12  405.35  101.71
  -3  -8 -12  323.35  108.25
  -3   8 -13  136.78   77.30
  -3  -8 -13   51.50   24.55
   3   8 -13  158.04   64.56
  -3  -8 -13   40.09   26.42
  -3   8 -14   32.25   48.85
   3   8 -14  163.33   45.64
  -3  -8 -14   59.56   36.76
  -3   8 -15  224.07   88.25
   3   8 -15  271.71   80.08
  -3  -8 -15  255.70  104.05
  -3   8 -16  222.55   58.92
   3   8 -16  242.46   82.91
  -3  -8 -16  157.21   34.98
  -3   8 -17  382.56   79.10
   3   8 -17  353.16  130.28
  -3   8 -18  -14.54   37.94
   3   8 -18   46.22   36.06
  -3   8 -19   95.30   66.66
   3   8 -19   -7.43   26.57
  -3   8 -20   84.05   50.13
   3   8 -20   31.04   44.25
  -3   8 -21   92.91   46.29
   3   9   0 6374.12  282.27
  -3  -9   0 6747.43  245.39
  -3   9   0 6551.76  230.75
   3  -9   0 7030.57  245.20
  -3   9  -1   25.35   22.62
   3   9   1   46.69   33.53
   3  -9  -1   -2.47   19.56
   3   9  -1  146.63   68.43
   3  -9   1   20.60   28.46
  -3   9   1   33.75   12.13
   3   9   2 1794.53  105.84
   3  -9  -2 1781.85   78.73
  -3   9  -2 1546.58   91.11
  -3  -9   2 1554.33   85.59
   3   9  -2 1683.34  105.81
  -3  -9  -2 1701.32   87.76
   3  -9   2 1720.34   84.24
  -3   9   2 1655.56   78.10
   3   9   3  213.48   57.14
  -3   9  -3  184.62   49.22
   3  -9  -3  148.47   49.05
  -3   9   3  162.84   25.24
   3   9  -3  132.08   32.69
  -3  -9  -3  263.14   41.22
   3  -9   3  165.43   49.06
   3   9   4   65.33   22.79
  -3   9  -4   29.82   37.51
   3  -9  -4   17.98   22.80
   3   9  -4   91.43   45.95
  -3   9   4   27.84   20.22
  -3  -9  -4    5.62   20.94
   3  -9   4   -0.52   17.92
   3   9   5  434.17  135.25
  -3   9  -5  356.42   52.16
   3  -9  -5  458.97   36.52
  -3  -9  -5  439.19   44.29
  -3   9   5  348.69   29.97
   3   9  -5  391.67   50.44
   3   9   6  162.08   54.24
  -3   9  -6  150.87   42.40
   3  -9  -6  130.11   38.38
  -3  -9  -6  148.64   26.59
  -3   9   6   78.84   43.59
   3   9  -6  271.48   50.85
   3   9   7  293.61   85.69
   3  -9  -7  275.39   37.57
  -3   9  -7  338.58   59.25
   3   9  -7  381.80   58.86
  -3   9   7  188.42   28.78
  -3   9  -8   48.35   37.77
  -3  -9  -8   44.32   36.44
   3   9  -8   25.14   31.64
  -3   9  -9   66.18   39.42
  -3  -9  -9   -4.47   19.98
   3   9  -9  182.93   54.34
  -3   9 -10  464.86   62.67
  -3  -9 -10  505.10   89.29
   3   9 -10  597.71   87.03
  -3   9 -11    7.77   37.62
  -3  -9 -11   12.10   12.56
   3   9 -11  172.07   73.11
  -3   9 -12 1174.95  122.08
  -3  -9 -12  883.47  143.16
   3   9 -12 1188.37  117.01
  -3  -9 -12 1352.99   96.77
  -3   9 -13   29.19   40.07
   3   9 -13   62.60   42.18
  -3  -9 -13   48.05   28.58
  -3   9 -14  959.43  102.20
   3   9 -14  666.64  197.53
  -3  -9 -14  961.97   79.06
  -3   9 -15   56.62   46.67
   3   9 -15   33.09   41.57
  -3  -9 -15   22.95   24.40
  -3   9 -16  282.78  112.42
   3   9 -16  321.11   83.42
  -3  -9 -16  124.40   74.69
  -3   9 -17  118.74   60.20
   3   9 -17   -0.13   34.90
  -3   9 -18   62.80   39.92
  -3   9 -19    6.30   25.24
   3   9 -19  161.63   60.72
  -3   9 -20   79.14   41.63
   3   9 -20   41.46   37.83
   3  10   0   73.41   37.56
  -3  10   0   22.07   33.75
   3 -10   0   -1.58   22.30
   3  10   1  768.93   55.75
  -3  10  -1  861.06  224.96
   3  10  -1  805.06  167.99
  -3  10   1  775.19   53.86
   3 -10   1  799.39  120.03
   3  10   2  114.68   36.32
   3  10  -2   97.46   40.17
  -3  10   2  222.94   38.27
  -3 -10  -2  141.43   48.49
   3 -10   2   72.92   33.36
   3  10   3   22.76   13.07
   3 -10  -3    1.17   17.11
  -3  10  -3   22.38   27.05
   3  10  -3   18.01   25.35
  -3 -10  -3   29.46   29.69
  -3  10   3  108.00   38.58
   3 -10  -4   65.72   22.61
  -3  10  -4   92.02   38.13
  -3  10   4  105.18   22.35
  -3 -10  -4  181.41   56.96
   3  10   5  167.95   68.61
  -3  10  -5  249.72   45.29
   3 -10  -5  126.39   59.79
   3  10  -5  177.27   50.21
  -3  10   5  186.75   31.69
  -3 -10  -5  231.51   42.31
  -3  10  -6   37.14   29.14
   3 -10  -6   11.51   14.01
  -3  10   6   18.22   15.52
   3  10   7  266.45   94.28
  -3  10  -7  257.69   55.74
   3 -10  -7  271.54   58.47
   3  10  -7  230.60   54.70
  -3  10   7  208.87   51.72
  -3 -10  -7  314.75   45.01
   3 -10  -8   66.53   20.36
  -3  10  -8   31.70   32.01
  -3 -10  -8  196.96   42.11
  -3  10   8   57.26   16.96
   3 -10  -9   60.72   22.25
  -3  10  -9  106.04   45.49
   3  10  -9  112.23   48.15
  -3 -10  -9   50.09   34.34
  -3  10 -10   42.98   37.88
   3  10 -10  273.51   63.31
  -3 -10 -10  101.36   37.55
  -3  10 -11    0.00   39.69
   3  10 -11   -5.89   35.40
  -3  10 -12  140.37   76.44
  -3 -10 -12  116.26   41.27
   3  10 -12  284.16   69.03
  -3  10 -13  101.89   44.00
   3  10 -13  167.14   50.69
  -3 -10 -13  119.64   37.42
  -3  10 -14  999.69  103.67
   3  10 -14 1339.51  143.84
  -3 -10 -14 1067.32   97.37
  -3  10 -15  241.13   65.06
   3  10 -15  278.17   69.99
  -3  10 -16  404.00   93.90
   3  10 -16  505.56   92.11
  -3  10 -17   72.35   59.97
   3  10 -17   69.70   50.99
  -3  10 -18  150.21   66.86
   3  10 -18  246.79   77.92
  -3  10 -19   56.24   39.32
   3  11   0 2188.21  151.47
  -3  11   0 2556.06  113.41
   3  11   1  316.40  104.22
  -3  11  -1  216.89   51.21
   3 -11  -1  191.97   39.12
   3  11  -1  249.31  144.63
  -3  11   1  231.82   57.01
   3  11   2  421.71   48.71
   3 -11  -2  599.95   61.00
  -3  11  -2  535.56   88.12
  -3  11   2  555.79   59.05
   3  11  -2  501.11  130.43
   3  11   3  784.89   64.22
   3 -11  -3  625.08   61.20
  -3  11  -3  688.99  192.74
  -3  11   3  654.77   64.05
   3  11  -3  592.32   69.03
   3  11   4  473.48  157.87
   3 -11  -4  496.54   62.03
  -3  11  -4  601.13  159.09
  -3  11   4  526.27   63.04
   3  11  -4  650.91   83.47
   3  11   5 1173.08   89.90
   3 -11  -5 1158.05   90.25
  -3  11  -5 1095.74   98.12
   3  11  -5 1228.56  100.50
  -3  11   5 1127.01   72.11
   3  11   6  246.39   61.52
   3 -11  -6  206.22   70.81
  -3  11  -6  285.94   53.93
   3  11  -6  421.65   76.87
  -3  11   6  244.54   74.54
   3  11   7  779.76   67.51
   3 -11  -7  738.21   97.56
  -3  11  -7  877.83  231.99
   3  11  -7  783.64   82.15
  -3  11   7  902.53   73.14
   3  11   8   79.71   28.98
   3 -11  -8   91.26   39.37
  -3  11  -8    5.97   33.52
  -3  11   8   86.60   36.05
   3  11  -8  105.66   61.29
  -3 -11  -8  105.33   37.75
  -3  11  -9  472.62   69.28
   3 -11  -9  468.48   40.64
   3  11  -9  474.54   87.38
  -3  11 -10   52.05   54.28
   3 -11 -10    0.07    2.50
   3  11 -10  103.70   73.26
  -3  11 -11  155.57   52.21
   3  11 -11   90.16   57.37
  -3  11 -12  589.61   80.36
   3  11 -12  810.25   96.30
  -3  11 -13   65.36   52.00
   3  11 -13   93.44   56.41
  -3 -11 -13   28.31   19.27
  -3  11 -14  294.08   77.19
   3  11 -14  324.41   62.68
  -3  11 -15   13.06   39.03
   3  11 -15  106.53   57.18
  -3 -11 -15   13.96   21.62
  -3  11 -16   96.46   62.77
   3  11 -16  228.81   77.52
  -3  11 -17    7.66   52.06
   3  11 -17   31.89   45.64
  -3  11 -18   -4.60   22.03
   3  11 -18   34.88   35.36
   3  12   0   85.89   90.86
  -3  12   0    1.85   20.31
  -3  12  -1  420.27  136.95
   3  12   1  288.49   78.87
  -3  12   1  288.83   86.21
   3  12  -1  319.84   75.65
   3  12   2  245.00   82.16
   3 -12  -2   91.12   52.34
  -3  12  -2  257.51   69.06
  -3  12   2  221.86   38.86
   3  12  -2  213.46   89.18
   3  12   3  616.04  153.40
   3 -12  -3  448.36   82.72
  -3  12  -3  539.66  150.32
  -3  12   3  595.17   53.91
   3  12  -3  597.75  148.53
   3  12   4  906.38   70.89
   3 -12  -4  802.40   52.87
  -3  12  -4  783.33  197.28
  -3  12   4  834.54   64.45
   3  12  -4 1047.90   93.27
   3  12   5  463.56  126.44
  -3  12  -5  322.50   50.25
  -3  12   5  384.44  107.86
   3  12  -5  364.84   50.55
   3  12   6   42.94   28.53
  -3  12  -6  102.76   48.00
   3  12  -6   31.27   34.91
   3  12   7  -11.21   22.08
   3 -12  -7   -4.81   14.36
  -3  12  -7   27.04   15.36
   3  12  -7   -1.24   34.90
  -3  12   7   20.80   15.14
   3  12   8  216.05  102.80
  -3  12  -8  327.78  114.28
   3 -12  -8  261.55   66.33
   3  12  -8  422.48   81.76
  -3  12  -9  314.62  160.42
   3  12  -9  201.02   58.47
  -3  12 -10 1277.49  119.91
   3  12 -10 1448.35  131.54
  -3  12 -11   67.43   48.47
   3  12 -11   72.04   45.53
  -3  12 -12  122.43   85.56
   3  12 -12  225.20   71.69
  -3  12 -13   33.51   47.46
   3  12 -13   66.36   66.48
  -3  12 -14   73.55   45.30
   3  12 -14   44.22   59.57
  -3 -12 -14   29.33   29.72
  -3  12 -15  158.78   67.92
   3  12 -15  115.97   54.55
  -3  12 -16  267.56  119.55
   3  12 -16  457.21   70.51
  -3  12 -17   58.90   39.33
   3  12 -17   74.07   36.07
   3  13   0  275.04   74.56
  -3  13   0  250.15   87.30
   3  13   1  195.13   65.45
  -3  13  -1   76.72   27.13
   3  13  -1  167.78   75.19
  -3  13   1  188.59   53.35
   3  13   2  763.25  186.82
  -3  13  -2  730.78   83.43
   3  13  -2  794.39  136.92
  -3  13   2  807.28   75.28
   3  13   3   63.72   34.53
   3 -13  -3   55.14   30.21
  -3  13  -3   68.04   37.42
  -3  13   3   83.67   46.97
   3  13  -3  119.06   50.48
   3  13   4  502.41  153.29
  -3  13  -4  700.06  164.44
  -3  13   4  665.00   60.35
   3  13  -4  578.09  134.53
   3  13   5   68.75   48.35
  -3  13  -5  252.11   71.63
  -3  13   5   99.57   35.14
   3  13  -5  285.18   75.52
   3  13   6 2829.30  162.56
   3 -13  -6 2799.13  147.07
  -3  13  -6 2716.26  171.43
   3  13  -6 3063.41  181.91
  -3  13   6 2659.98  140.41
   3  13   7    0.01   24.18
  -3  13  -7   95.51   48.16
  -3  13   7   15.95   23.04
   3  13  -7  106.34   53.23
   3  13   8  164.21   95.52
  -3  13  -8  349.28   67.67
   3  13  -8  218.35   72.61
  -3  13  -9   56.57   39.15
   3  13  -9  187.78   69.65
  -3  13 -10  362.36  112.21
   3  13 -10  222.11   53.68
  -3  13 -11   63.90   66.71
   3  13 -11   96.18   60.35
  -3  13 -12   55.37   43.31
   3  13 -12   85.14   61.49
  -3  13 -13   98.30   77.78
   3  13 -13   75.92   56.65
  -3  13 -14  138.00   78.44
   3  13 -14   89.56   74.70
  -3  13 -15   97.49   59.99
   3  13 -15  308.27   78.70
  -3  13 -16  380.51  113.22
   3  13 -16  504.30  137.93
   3  14   0   27.16   26.33
  -3  14   0    9.30   25.78
   3  14   1  440.43  164.29
  -3  14  -1  251.91  107.66
   3  14  -1  524.44  140.43
  -3  14   1  485.74   63.38
   3  14   2 1100.63  119.81
  -3  14  -2 1236.35  115.41
   3  14  -2 1069.25   99.50
  -3  14   2 1028.20   89.05
   3  14   3  526.77   94.69
  -3  14  -3  428.46  136.38
   3  14  -3  631.76  142.85
  -3  14   3  475.20   60.13
   3  14   4   37.20   39.74
  -3  14  -4   52.54   33.40
   3  14  -4   60.48   36.71
  -3  14   4   59.04   31.77
   3  14   5  434.64  169.60
  -3  14  -5  686.28   90.24
   3  14  -5  512.09   55.39
  -3  14   5  550.21   89.90
   3  14   6   59.33   33.82
  -3  14  -6   20.80   32.43
  -3  14   6    9.15   15.59
   3  14  -6   23.33   35.50
   3  14   7   63.21   68.93
  -3  14  -7  251.12   69.19
  -3  14   7   96.51   54.77
   3  14  -7  156.91   66.86
   3  14   8   52.86   42.03
  -3  14  -8   44.64   56.58
  -3  14  -9  780.85  105.31
   3  14  -9  502.46   83.69
  -3  14 -10  354.88  139.46
   3  14 -10  463.81   99.92
  -3  14 -11  362.51   94.12
   3  14 -11  370.50   67.53
  -3  14 -12  138.15   72.24
   3  14 -12   60.99   53.61
  -3  14 -13  337.09   90.02
   3  14 -13  100.67   49.92
  -3  14 -14  112.19   83.64
   3  14 -14   95.62   61.03
  -3  14 -15   48.42   45.16
   3  14 -15  162.64   74.48
   3  15   0 1945.59  158.91
  -3  15   0 2075.81  166.88
   3  15   1   94.67   49.49
  -3  15  -1  114.79   50.73
   3  15  -1   64.39   55.77
  -3  15   1   94.46   50.54
   3  15   2 2255.81  173.81
  -3  15  -2 2129.34  162.24
   3  15  -2 2613.51  204.39
  -3  15   2 2260.58  175.59
   3  15   3  146.64   45.66
  -3  15  -3   79.15   25.61
  -3  15   3  108.61   30.74
   3  15  -3  125.67   46.74
   3  15   4  478.82  122.44
   3  15  -4  507.64  114.63
  -3  15   4  411.93  121.57
   3  15   5   59.97   34.75
  -3  15  -5   48.42   29.76
   3  15  -5   97.87   43.10
   3  15   6  387.60  167.13
  -3  15  -6  442.50   69.71
  -3  15   6  333.22  127.85
   3  15  -6  495.56  213.83
   3  15   7   60.51   34.55
  -3  15  -7   56.82   32.43
   3  15  -7  144.08   64.47
   3  15   8  113.89   31.91
   3  15  -8   92.94   54.90
  -3  15  -9  100.74   59.12
   3  15  -9   14.85   38.54
  -3  15 -10  745.27  212.61
   3  15 -10 1165.36  129.76
  -3  15 -11   20.01   42.37
   3  15 -11   46.36   44.16
  -3  15 -12  525.42  171.19
   3  15 -12  712.63  101.06
  -3  15 -13  148.13   73.88
   3  15 -13   93.26   68.60
   3  16   0   87.59   40.39
  -3  16   0    0.57   29.34
   3  16   1  348.02   98.00
  -3  16  -1  412.46   68.01
   3  16  -1  318.11  123.55
  -3  16   1  533.59   74.53
   3  16   2  249.51   81.97
  -3  16  -2  230.30  103.88
  -3  16   2  404.58   76.88
   3  16  -2  204.19   56.68
   3  16   3  225.77   53.96
  -3  16  -3  265.94   74.76
  -3  16   3  246.95   56.61
   3  16  -3  300.24   78.37
   3  16   4   69.19   34.94
  -3  16  -4    8.09   29.40
  -3  16   4  115.51   34.25
   3  16  -4  104.80   52.66
  -3  16  -5  276.30  152.49
  -3  16   5  339.29   86.31
   3  16  -5  366.67  109.86
   3  16   6   36.30   24.84
  -3  16  -6   85.45   57.18
   3  16  -6  112.27   53.12
   3  16   7  166.84   84.04
  -3  16  -7  151.99   93.29
   3  16  -7  287.47   71.74
  -3  16  -8  131.24   80.39
   3  16  -8   63.93   40.59
  -3  16  -9  168.35  143.51
   3  16  -9  368.35   90.07
  -3  16 -10  155.99   73.43
   3  16 -10  172.77   87.22
  -3  16 -11  509.73  135.29
   3  16 -11  405.33  119.90
   3  17   0  198.27   57.20
  -3  17   0  217.96   96.37
   3  17   1    6.13   26.51
  -3  17  -1   58.86   49.76
   3  17  -1   41.71   22.98
  -3  17   1  114.67   55.54
   3  17   2  227.26   96.86
  -3  17  -2  255.35   72.92
  -3  17   2  266.55   59.86
   3  17  -2  186.95   68.57
   3  17   3   25.94   31.78
  -3  17  -3  167.67   81.45
   3  17  -3   77.67   35.14
  -3  17   3   45.87   31.42
  -3  17  -4  798.54   88.81
  -3  17   4  543.40  149.49
   3  17  -4  724.02  295.08
   3  17   5   76.68   34.05
  -3  17  -5    2.28   41.41
   3  17  -5    4.53   36.70
   3  17   6 1298.62   86.37
   3  17  -6 1552.05  117.87
   3  17   7   33.45   42.49
  -3  17  -7   54.93   36.07
   3  17  -7   68.19   38.54
   3  17   8  249.69  184.02
  -3  17  -8  334.88  192.47
   3  17  -8  621.51  219.42
  -3  17  -9  130.19   58.26
   3  17  -9   21.24   31.10
   3  18   0   37.15   54.48
  -3  18   0   15.42   31.27
  -3  18  -1  249.14   79.36
   3  18   1  182.36   97.74
  -3  18   1  198.34   63.28
   3  18  -1  275.61   91.78
  -3  18   2  145.90   56.28
   3  18  -2  265.18   95.05
  -3  18  -3  163.65   75.09
   3  18  -3  141.63   61.29
   3  18   4    4.20   25.11
  -3  18  -4  121.62   65.26
   3  18  -4   59.19   40.87
   3  18   5   93.96   32.60
  -3  18  -5  115.81   78.37
  -4   0   0 5497.10  143.21
  -4   0   1    7.38    6.14
   4   0  -2  111.99   21.76
  -4   0   2   87.28   31.05
   4   0  -3   14.05   10.54
  -4   0   3    4.21    8.33
  -4   0  -3   22.77   13.06
   4   0  -4   14.93   19.42
  -4   0   4   25.48   13.66
  -4   0  -4   36.91   24.98
   4   0  -5   -2.88   12.29
  -4   0   5   47.90   23.86
  -4   0  -5   14.00   16.48
   4   0  -6  100.80   46.41
  -4   0   6  153.71   41.23
  -4   0  -6  155.84   54.06
   4   0  -7    9.28   15.75
  -4   0   7   11.68    9.66
  -4   0  -7   30.64   20.98
   4   0   7   53.57   24.90
   4   0  -8  267.19   27.84
  -4   0   8  246.85   21.46
  -4   0  -8  229.90   61.27
   4   0   8  246.85   54.51
   4   0  -9    0.21   11.51
  -4   0   9   11.07   15.85
  -4   0  -9   39.09   19.01
   4   0   9   44.15   17.72
   4   0 -10 2135.10   99.34
  -4   0  10 2063.49   95.34
  -4   0 -10 2042.52  117.35
   4   0  10 2023.46  108.55
   4   0 -11   30.50   18.87
  -4   0  11   12.83   12.13
  -4   0 -11   17.50   20.50
   4   0  11   33.98   23.10
   4   0 -12 1322.05   76.55
  -4   0  12 1424.86   79.89
  -4   0 -12 1349.78   83.86
   4   0  12 1307.15   84.62
   4   0 -13   49.95   30.14
  -4   0  13   30.79   18.68
  -4   0 -13   30.23   27.56
   4   0 -14  354.17   45.14
  -4   0  14  337.82   72.67
  -4   0 -14  359.20   96.15
   4   0 -15    8.55   14.38
  -4   0  15    6.16   11.08
  -4   0 -15   69.16   29.86
   4   0 -16   47.67   31.07
  -4   0 -16   67.65   54.13
   4   0 -17   74.21   35.68
  -4   0 -17   23.08   22.87
   4   0 -18   57.39   30.79
  -4   0 -18   -4.69   27.30
   4   0 -19    9.88   21.03
  -4   0 -19   25.37   20.01
  -4   0 -20   23.37   24.15
  -4   0 -21   41.24   38.83
  -4   0 -22  113.60   67.24
  -4   0 -23   11.45   19.34
  -4  -1   0   19.93   12.00
  -4   1   0   28.18   15.12
  -4   1  -1  506.01   41.11
  -4  -1   1  484.84   48.58
   4   1  -1  490.28   29.58
  -4  -1  -1  527.89   75.79
  -4   1  -2  877.73   49.69
  -4  -1   2  962.32   42.89
  -4   1   2  869.11   37.33
   4   1  -2  908.40   44.26
  -4   1  -3 3273.54   99.96
  -4  -1   3 3434.46   96.09
  -4   1   3 3213.42   92.41
   4   1  -3 3402.59   97.51
   4  -1   3 3152.58  104.91
   4  -1  -4  326.61   30.55
  -4   1  -4  246.25   56.69
  -4  -1   4  350.10   39.00
  -4   1   4  340.51   38.23
   4   1  -4  338.64   38.20
   4  -1   4  340.60   39.55
  -4   1  -513318.03  338.86
  -4  -1   512767.27  313.91
  -4   1   512409.51  297.61
   4   1  -512646.69  320.65
  -4  -1  -512876.02  326.65
   4  -1   512744.37  323.84
   4  -1  -6  253.79   45.09
  -4   1  -6  325.62   66.14
  -4  -1   6  320.18   58.14
  -4   1   6  265.98   31.56
   4   1  -6  245.24   54.81
  -4  -1  -6  322.23   75.70
   4  -1   6  321.02   72.23
   4  -1  -710514.85  260.23
  -4   1  -710509.75  303.42
  -4  -1   710422.20  263.13
  -4   1   710775.55  261.10
   4   1  -710789.95  272.89
  -4  -1  -710922.02  286.88
   4  -1   710706.95  278.36
   4  -1  -8  912.13   64.60
  -4   1  -8  918.09   51.23
  -4  -1   8  874.91   43.64
  -4   1   8  872.39   34.68
   4   1  -8  913.30   45.05
  -4  -1  -8  890.37   64.73
   4  -1   8  843.81   45.32
   4  -1  -910981.44  440.65
  -4  -1   910650.02  432.20
  -4   1  -910030.23  440.30
   4   1  -9 9661.44  394.88
  -4   1   911419.25  455.81
  -4  -1  -911164.35  487.54
   4  -1   910962.09  457.84
   4  -1 -10 1679.78   82.75
  -4   1 -10 1722.04   98.19
  -4  -1  10 1661.19   83.21
  -4   1  10 1580.41   74.91
   4   1 -10 1618.46   88.69
  -4  -1 -10 1553.27   91.75
   4  -1  10 1726.46  107.93
   4  -1 -11 4991.42  170.65
  -4  -1  11 4294.50  169.11
  -4   1 -11 4381.18  178.77
   4   1 -11 4753.94  172.46
  -4   1  11 4952.58  168.47
  -4  -1 -11 4410.03  188.71
   4  -1  11 4906.34  183.48
  -4   1 -12  115.37   52.39
   4  -1 -12   82.81   25.60
  -4  -1  12   30.75   23.27
   4   1 -12   86.26   31.28
  -4   1  12   55.99   19.39
  -4  -1 -12   20.56   30.32
   4  -1  12   43.15   25.22
  -4   1 -13 2298.95  148.83
   4  -1 -13 2463.83  145.27
  -4  -1  13 2587.54  156.93
   4   1 -13 2665.95  164.77
  -4   1  13 2536.94  147.76
  -4  -1 -13 2474.41  162.51
   4  -1 -14  761.89   48.91
  -4   1 -14  635.66   71.50
  -4  -1  14  707.36   46.24
   4   1 -14  910.79   60.03
  -4  -1 -14  689.86   70.26
  -4   1  14  819.90   43.31
  -4   1 -15  669.00   80.79
   4  -1 -15  660.72   49.28
  -4  -1  15  382.67  130.25
   4   1 -15  646.74   85.92
  -4  -1 -15  563.81  136.75
  -4   1  15  511.48  104.16
  -4   1 -16  439.99  157.56
   4   1 -16  454.53   48.85
  -4  -1 -16  374.09   71.76
   4  -1 -17  561.91   47.61
  -4   1 -17  556.66   62.60
   4   1 -17  730.67   71.82
  -4  -1 -17  610.05   61.81
   4  -1 -18  100.84   34.41
  -4   1 -18   69.26   45.73
   4   1 -18   87.15   43.81
  -4  -1 -18   97.98   43.09
  -4   1 -19  872.35   91.79
   4   1 -19  933.18   85.42
  -4  -1 -19  646.14  112.22
  -4   1 -20   53.71   32.72
  -4  -1 -20   29.34   34.05
  -4   1 -21  154.47   68.22
  -4  -1 -21  223.81  151.08
  -4   1 -22  207.51   42.82
  -4  -1 -22  117.29   99.08
  -4  -1 -23  179.08  145.71
   4   2   010589.36  268.95
  -4  -2   011162.41  280.05
  -4   2   010862.86  265.30
  -4   2  -1 3893.96  113.17
  -4  -2   1 3692.69  108.38
   4   2  -1 3680.62  106.91
  -4  -2  -1 3801.99  121.52
   4  -2   1 3787.65  105.48
  -4   2  -2 1205.15   61.02
  -4  -2   2 1185.16   48.05
   4   2  -2 1261.45   52.98
  -4  -2  -2 1166.26   57.52
  -4   2   2 1146.66   49.16
   4  -2   2 1177.07   53.99
  -4  -2   3 7194.29  186.42
  -4   2  -3 7062.89  186.33
   4   2  -3 6830.16  191.23
  -4   2   3 6974.29  171.22
  -4  -2  -3 7608.97  207.11
   4  -2   3 6866.97  185.62
  -4   2   3 6814.41  166.65
  -4   2  -4 2389.13   86.62
  -4  -2   4 2477.66   85.16
   4   2  -4 2428.43  114.64
  -4   2   4 2463.83   69.13
   4  -2   4 2663.50   87.97
  -4   2  -5  838.38   42.94
  -4  -2   5  925.01   54.31
  -4   2   5  970.30   35.35
   4   2  -5  984.91   65.91
   4  -2   5  898.41   52.28
  -4   2  -6 2116.73   85.89
  -4  -2   6 2154.94   81.98
  -4   2   6 2277.93   63.84
   4   2  -6 2279.23   82.97
   4  -2   6 2266.92   99.94
  -4  -2  -6 2351.01   90.99
   4  -2  -7  164.92   25.51
  -4   2  -7  220.51   52.71
  -4  -2   7  156.03   64.99
  -4   2   7  153.87   25.77
   4   2  -7  148.10   28.46
   4  -2   7  158.77   36.00
  -4  -2  -7  208.82   52.70
   4  -2  -8 2228.91   50.99
  -4   2  -8 2236.26   80.45
  -4  -2   8 2264.72   73.73
  -4   2   8 2229.22   46.98
   4   2  -8 2128.79   79.60
  -4  -2  -8 2178.85   76.35
   4  -2  -9  384.43   36.85
  -4   2  -9  587.93  141.15
  -4  -2   9  375.07   83.30
  -4   2   9  418.11   18.61
   4   2  -9  334.94   28.52
   4  -2   9  397.04  103.62
  -4  -2  -9  440.04   89.74
   4  -2 -10  134.23   27.77
  -4   2 -10  204.49  102.46
  -4  -2  10  121.19   20.73
  -4   2  10  154.13   22.32
   4   2 -10  212.21   38.73
  -4  -2 -10  196.65   41.49
   4  -2  10  114.85   27.16
   4  -2 -11 1329.97   68.77
  -4  -2  11 1272.63  102.90
  -4   2 -11 1377.43   97.64
   4   2 -11 1364.91   86.02
  -4   2  11 1470.16   72.42
  -4  -2 -11 1292.05   80.59
   4  -2  11 1340.51  144.01
   4  -2 -12   45.62   17.54
  -4  -2  12   35.17   11.46
  -4   2 -12   47.86   34.84
   4   2 -12   31.71   19.64
  -4  -2 -12   24.50   18.60
  -4   2  12   45.79   15.94
   4  -2 -13 1213.49   52.66
  -4  -2  13 1190.38   63.92
  -4   2 -13 1008.90   93.59
   4   2 -13 1222.94   70.19
  -4   2  13 1180.21   46.74
  -4  -2 -13 1122.22   71.50
  -4   2 -14  190.87   49.72
   4  -2 -14  251.11   27.08
  -4  -2  14  128.35   42.39
   4   2 -14  303.76   68.94
  -4   2  14  175.03   35.43
  -4  -2 -14  120.44   39.72
   4  -2 -15  326.53   33.86
  -4   2 -15  357.24   51.81
  -4  -2  15  247.64   78.44
   4   2 -15  337.75   65.04
  -4  -2 -15  303.83   69.14
  -4   2  15  228.01   59.45
   4  -2 -16 1139.03   80.36
  -4   2 -16  898.91   90.22
  -4  -2  16  600.84  190.84
   4   2 -16  947.12   89.62
  -4  -2 -16  986.16   88.53
  -4   2  16  850.90   56.70
   4  -2 -17  160.04   30.22
  -4   2 -17  152.52   68.50
   4   2 -17  183.68   46.52
  -4  -2 -17   51.65   27.75
   4  -2 -18  519.62   44.56
  -4   2 -18  328.30  119.14
   4   2 -18  469.04   54.73
  -4  -2 -18  551.21   68.26
  -4   2 -19   -6.32   33.81
   4   2 -19   51.59   44.32
  -4  -2 -19   81.38   43.04
  -4   2 -20  269.48  160.37
   4   2 -20  468.97   71.42
  -4  -2 -20  262.61  128.35
  -4   2 -21   19.55   34.44
  -4  -2 -21   82.23   48.95
  -4   2 -22    6.78   31.86
  -4  -2 -22   38.90   26.62
  -4   2 -23   42.80   40.39
  -4  -2 -23   -3.61   35.22
  -4  -3   0   16.53   21.40
   4   3   0    0.88   17.59
  -4   3   0   19.61   20.86
   4  -3   0   19.83   20.83
   4   3   1 2366.31   77.50
  -4   3  -1 2697.42   85.48
  -4  -3   1 2425.49   80.01
   4  -3  -1 2352.01   71.66
   4   3  -1 2548.86   86.89
  -4   3   1 2409.27   82.65
  -4  -3  -1 2552.49   96.30
   4  -3   1 2490.94   87.18
   4   3   216187.98  393.20
  -4   3  -215952.72  402.08
  -4  -3   216580.84  400.97
  -4  -3  -216311.35  395.04
  -4   3   216503.48  390.76
   4   3  -216301.87  401.08
   4  -3   216104.82  393.42
  -4  -3   3 6328.65  169.05
  -4  -3  -3 6265.94  178.94
   4   3  -3 5928.40  183.92
  -4   3   3 6209.82  153.18
   4  -3   3 6084.61  172.74
  -4  -3   4 5621.50  155.35
  -4   3  -4 5603.76  159.38
   4   3  -4 5299.29  165.47
  -4  -3  -4 5627.62  159.95
  -4   3   4 5412.60  136.29
  -4   3   4 5499.54  137.55
   4  -3   4 5697.01  160.62
  -4  -3   514090.84  354.32
  -4   3  -514279.79  381.36
  -4   3   514696.19  345.33
  -4  -3  -515674.04  389.78
   4   3  -514714.23  380.53
   4  -3   515820.31  394.88
  -4  -3   6  631.31   70.69
  -4   3  -6  413.30   47.05
  -4   3   6  535.40   38.78
  -4  -3  -6  571.09   59.42
   4   3  -6  476.71   44.75
   4  -3   6  469.16   51.79
  -4  -3   7  879.02   83.80
  -4   3  -7  851.09   53.26
   4   3  -7  959.94   54.49
   4  -3   7  892.92   45.45
  -4  -3  -7  794.66   49.69
  -4  -3   8   42.64   25.50
  -4   3  -8   52.59   32.99
   4   3  -8   64.22   25.18
  -4  -3  -8   61.03   17.97
   4  -3   8   55.73   28.88
  -4  -3   9 3324.65  160.78
  -4   3  -9 3356.77  181.59
   4   3  -9 3140.20  150.05
  -4  -3  -9 3432.45  166.05
   4  -3   9 3489.45  161.69
  -4  -3  10 1941.04   94.10
  -4   3 -10 2094.31  102.53
   4   3 -10 2133.14  105.30
  -4  -3 -10 2232.00  105.98
   4  -3  10 2102.80   97.74
  -4  -3  11 1723.24  125.33
  -4   3 -11 1550.27   98.77
   4   3 -11 1686.16  104.45
  -4   3  11 1799.66   82.26
  -4  -3 -11 1550.33  102.96
   4  -3 -12 1999.13  110.94
  -4  -3  12 2103.70  130.98
  -4   3 -12 1878.40  193.22
   4   3 -12 2001.46  143.05
  -4  -3 -12 1935.43  131.74
  -4   3  12 2045.43  114.26
   4  -3 -13 1251.49   41.81
  -4   3 -13 1165.65   82.34
   4   3 -13 1251.68   88.66
  -4  -3 -13 1345.08  166.74
  -4   3  13 1210.27   40.27
   4  -3 -14  512.39   56.30
  -4  -3  14  447.65  103.84
  -4   3 -14  402.28   53.19
   4   3 -14  632.53   68.46
  -4  -3 -14  504.52  115.45
   4  -3 -15    6.92    5.34
  -4   3 -15   15.16   38.20
   4   3 -15   18.36   21.93
  -4  -3 -15   12.12   19.67
   4  -3 -16  752.84   51.24
  -4   3 -16  820.98  228.77
   4   3 -16  808.24  162.95
  -4  -3 -16  863.74  153.80
   4  -3 -17  425.74   29.52
  -4   3 -17  280.91  126.82
   4   3 -17  387.01  122.80
  -4  -3 -17  357.87  150.09
  -4   3 -18  160.57   74.14
   4   3 -18  307.47   47.25
  -4  -3 -18  264.19   54.09
  -4   3 -19  365.79  128.06
  -4  -3 -19  428.15  151.70
  -4   3 -20   15.32   34.32
   4   3 -20   15.71   43.98
  -4  -3 -20   55.10   42.80
  -4   3 -21   48.48   57.45
  -4  -3 -21  110.91   51.27
  -4   3 -22  288.41   60.07
   4   3 -22  446.96   81.35
  -4  -3 -22  247.76  140.24
   4   4   0 3791.46  123.28
  -4  -4   0 3387.70  110.03
  -4   4   0 3716.72  111.78
   4  -4   0 3826.24  113.60
   4   4   1   52.70   21.88
   4  -4  -1   25.57   20.42
  -4  -4   1   28.79   18.20
  -4   4  -1   39.70   18.07
  -4  -4  -1   22.42   26.76
   4   4  -1   64.52   33.18
   4  -4   1   60.20   29.60
  -4   4   1   21.74    9.01
   4   4   214892.53  370.16
   4  -4  -214461.80  352.66
  -4   4  -214401.89  360.85
  -4  -4   213996.57  351.29
  -4  -4  -215346.91  384.75
   4   4  -213765.45  352.65
   4  -4   214807.41  366.87
  -4   4   214390.50  351.35
   4   4   3  127.57   25.76
  -4   4  -3  112.92   21.93
  -4  -4   3  103.86   26.60
   4  -4  -3  111.23   30.89
   4   4  -3  121.08   30.31
  -4   4   3  136.68   36.85
   4  -4   3  113.07   33.26
  -4  -4  -3  133.32   40.66
  -4   4  -4   90.00   29.17
  -4  -4   4  115.18   29.41
  -4  -4  -4   91.23   20.58
  -4   4   4   97.20   19.60
   4   4  -4   49.45   51.22
   4  -4   4  110.75   32.14
  -4  -4   5  183.47   33.90
  -4   4  -5  212.29   64.84
   4   4  -5  127.09   37.15
  -4   4   5  153.22   22.52
  -4  -4  -5  157.02   39.95
   4  -4   5  135.14   40.67
  -4   4  -6 7548.71  164.33
  -4  -4   6 7710.12  170.87
   4   4  -6 7803.04  170.47
  -4  -4  -6 7559.80  167.76
   4  -4   6 8075.54  169.47
  -4   4  -7   33.49   28.96
  -4  -4   7    2.03   19.79
   4   4  -7   65.90   34.51
  -4  -4  -7   17.71    8.76
   4  -4   7   -2.94   27.95
  -4   4  -8 2661.80  133.53
  -4  -4   8 2402.27  119.59
   4   4  -8 2649.42  143.00
  -4  -4  -8 2459.30  126.22
  -4   4  -9  192.23   40.48
  -4  -4   9   99.45   31.97
   4   4  -9  176.23   44.14
  -4  -4  -9  148.34   35.33
   4  -4   9   97.13   29.36
  -4  -4  -9  222.49   48.92
  -4   4 -10  156.13   48.47
  -4  -4  10  110.72   41.88
   4   4 -10  165.93   55.69
  -4  -4 -10   87.29   29.21
  -4  -4 -10  130.72   28.57
  -4   4 -11  229.83   42.00
  -4  -4  11  178.28   41.06
   4   4 -11  167.18   40.22
  -4  -4 -11  170.42   74.28
  -4   4 -12  737.61  140.47
  -4  -4 -12  495.15   45.30
  -4   4 -13   33.99   45.32
   4   4 -13   92.39   42.83
  -4  -4 -13   42.05   26.73
  -4   4 -14 1125.91  240.65
   4   4 -14 1324.09  100.30
  -4  -4 -14 1227.88   89.38
  -4   4 -15   85.31   46.94
   4   4 -15  159.74   52.67
  -4  -4 -15   20.62   45.87
  -4   4 -16   39.21   34.83
   4   4 -16   58.76   44.68
  -4  -4 -16   49.68   26.72
  -4   4 -17   42.07   15.77
   4   4 -17   10.07   12.83
  -4  -4 -17   36.25   25.98
  -4   4 -18   40.47   32.83
   4   4 -18  121.00   46.08
  -4  -4 -18  115.32   48.76
  -4   4 -19   14.79   30.56
   4   4 -19  115.22   44.32
  -4   4 -20   30.08   23.37
  -4   4 -21   20.74   30.52
   4   4 -21  -28.21   29.97
  -4  -4 -21   -9.54   31.81
  -4   4 -22   72.51   54.47
   4   4 -22   48.78   48.45
   4   5   0   46.15   25.60
  -4  -5   0   15.88   19.86
  -4   5   0   12.95   15.03
   4  -5   0   35.42   17.69
  -4  -5   1  693.49   66.46
   4   5   1  615.82   66.38
   4  -5  -1  616.08   81.89
  -4   5  -1  650.78   62.75
  -4  -5  -1  672.95  102.89
  -4   5   1  618.12   53.20
   4   5  -1  676.62   70.60
   4  -5   1  745.76   64.20
   4   5   2  123.10   36.54
  -4   5  -2   86.27   23.79
  -4  -5   2  131.67   27.46
   4  -5  -2  162.05   45.64
   4   5  -2  164.19   44.17
  -4  -5  -2  105.35   38.15
  -4   5   2  166.91   39.70
   4  -5   2  170.12   50.05
   4   5   3  137.57   31.72
  -4   5  -3   80.05   17.17
  -4  -5   3  116.08   28.91
   4  -5  -3   94.48   29.45
   4   5  -3  129.31   43.72
  -4   5   3   73.01   24.93
   4  -5   3   64.10   22.85
  -4  -5  -3   65.88   16.80
   4   5   4 1661.40   88.63
   4  -5  -4 1613.82   49.71
  -4   5  -4 1716.32   76.93
  -4  -5   4 1528.31   72.01
  -4  -5  -4 1500.85   61.81
   4   5  -4 1623.97  142.36
   4  -5   4 1704.15   72.13
  -4   5   4 1574.03   51.31
  -4   5  -5 2812.68  103.22
  -4  -5  -5 2820.54   85.85
   4   5  -5 2626.73   93.78
   4  -5   5 2779.54   84.41
  -4   5  -6  545.56   42.68
  -4  -5   6  670.12   51.18
   4   5  -6  572.54   51.29
  -4  -5  -6  611.72   85.74
   4  -5   6  681.43  138.36
  -4   5  -7   17.99   28.52
  -4  -5   7   10.53   14.85
   4   5  -7   48.06   28.88
  -4  -5  -7   26.50   16.90
   4  -5   7   21.04   17.12
  -4   5  -8  359.61   50.07
  -4  -5   8  459.55   46.60
   4   5  -8  411.86   91.02
  -4  -5  -8  333.03   71.81
   4  -5   8  278.12  110.88
  -4   5  -9   -7.97   29.69
  -4  -5   9   15.63   22.17
   4   5  -9   86.29   53.76
  -4  -5  -9   14.84   17.34
  -4   5 -10 1625.55  110.02
  -4  -5  10 1625.38   97.65
   4   5 -10 1571.05  109.49
  -4  -5 -10 1468.12   85.16
  -4  -5 -10 1771.90  174.36
  -4   5 -11  279.03   61.36
  -4  -5 -11  172.73   83.01
   4   5 -11  320.36   49.07
  -4  -5 -11  291.36   73.61
  -4   5 -12   37.66   26.52
   4   5 -12  132.25   42.25
  -4  -5 -12  116.58   48.03
  -4   5 -13   25.35   24.63
   4   5 -13  110.27   45.40
  -4  -5 -13   27.34   20.96
  -4   5 -14 1248.49  171.61
  -4  -5 -14 1210.76   76.53
   4   5 -14 1251.83   91.09
  -4  -5 -14 1189.67   69.57
  -4   5 -15   47.30   41.92
   4   5 -15   89.89   49.65
  -4  -5 -15   24.85   29.21
  -4   5 -16  237.46   44.10
   4   5 -16  147.35   44.76
  -4  -5 -16  183.42   57.31
  -4   5 -17   43.88   45.22
   4   5 -17   -6.35   22.86
  -4  -5 -17   37.40   28.14
  -4   5 -18   89.96   57.95
   4   5 -18   69.96   40.59
  -4   5 -19   16.49   23.44
   4   5 -19   81.31   47.08
  -4  -5 -19  128.30   45.24
  -4   5 -20   62.02   38.63
   4   5 -20  137.84   64.68
  -4   5 -21   -1.74   32.38
   4   5 -21    8.42   28.91
  -4  -5 -21   28.60   26.03
   4   5 -22  285.98   94.51
  -4  -6   0 7035.02  154.07
   4  -6   0 7260.98  148.25
   4   6   1  166.89   44.12
  -4   6  -1  240.34   84.75
  -4  -6   1  186.17   31.21
   4  -6  -1  160.44   44.88
  -4  -6  -1  183.32   32.54
  -4   6   1  229.12   62.54
   4  -6   1  163.20   38.49
   4   6  -1  154.06   33.12
   4   6   2  714.15   86.35
  -4   6  -2  821.14   45.38
  -4  -6   2  912.96   61.20
   4  -6  -2  772.39   51.71
   4   6  -2  758.77   45.84
  -4   6   2  884.42   35.93
  -4  -6  -2  847.34   48.52
   4  -6   2  874.02   44.20
   4   6   3 4099.13  106.16
   4  -6  -3 3995.64   86.84
  -4   6  -3 3959.46  142.22
  -4  -6   3 3917.35  108.86
   4   6  -3 4047.84  129.19
  -4  -6  -3 3999.91  108.04
   4  -6   3 4023.75  103.20
  -4   6   3 4132.52   87.81
   4   6   4 1616.29   62.50
   4  -6  -4 1680.63   46.81
  -4   6  -4 1755.45   71.49
  -4  -6   4 1768.00   76.04
   4   6  -4 1609.27   80.35
  -4  -6  -4 1562.65   57.48
   4  -6   4 1733.68   68.37
  -4   6   4 1673.91   48.65
   4   6   5  264.11   38.21
   4  -6  -5  281.68   21.03
  -4   6  -5  341.82   95.10
  -4  -6   5  376.01   42.25
  -4  -6  -5  234.19   50.37
   4   6  -5  356.91   43.90
   4  -6   5  304.78   65.56
  -4   6   5  269.07   16.89
  -4   6  -6   33.77   15.80
  -4  -6   6   60.46   26.80
   4   6  -6   50.95   30.96
  -4  -6  -6   56.41   31.50
   4  -6   6   26.49   23.48
  -4   6  -7  152.55   58.05
  -4  -6   7   69.69   28.65
   4   6  -7  140.72   43.34
  -4  -6  -7  123.35   39.12
   4  -6   7   93.55   22.77
  -4   6  -8 1217.83  181.99
  -4  -6   8 1009.82  117.74
   4   6  -8 1161.83   82.73
  -4  -6  -8  964.75   67.05
  -4   6  -9  495.62   94.15
  -4  -6  -9  227.19   58.76
   4   6  -9  352.33   43.15
  -4   6 -10   45.26   25.81
  -4  -6 -10   60.31   30.77
   4   6 -10  116.54   46.49
  -4  -6 -10   50.21   24.00
  -4   6 -11   60.10   40.73
  -4  -6 -11   51.17   24.52
   4   6 -11  109.25   43.99
  -4  -6 -11   49.96   42.89
  -4   6 -12 1050.00  129.69
  -4  -6 -12  540.95  141.88
   4   6 -12 1038.62   97.39
  -4  -6 -12  891.17   69.73
  -4   6 -13 1102.23  200.40
  -4  -6 -13 1011.74   65.46
   4   6 -13  841.99   84.20
  -4  -6 -13 1045.37  126.59
  -4   6 -14  129.01   40.23
  -4  -6 -14   92.41   41.29
   4   6 -14  118.43   60.26
  -4  -6 -14  155.93   34.42
  -4   6 -15   58.52   45.76
   4   6 -15  162.56   57.79
  -4  -6 -15   40.16   33.53
  -4   6 -16   10.14   46.24
   4   6 -16  100.55   57.47
  -4  -6 -16   75.26   51.17
  -4   6 -17   57.76   37.80
   4   6 -17  115.63   59.49
  -4   6 -18   39.76   37.38
   4   6 -18   23.28   33.38
  -4  -6 -18   12.63   13.73
  -4   6 -19  127.68   76.59
   4   6 -19  184.99   47.71
  -4  -6 -19   87.58   93.43
  -4   6 -20   95.44   53.33
   4   6 -20    5.46   33.54
  -4  -6 -20   55.51   39.63
  -4   6 -21   14.61   40.84
   4   6 -21   85.23   59.64
  -4   6 -22    9.60   39.45
   4   7   0   23.03   28.54
  -4  -7   0   44.65   31.49
  -4   7   0   25.67   21.23
   4  -7   0    0.71   17.51
   4   7   1 2197.67   91.77
   4  -7  -1 2097.80   64.13
  -4   7  -1 2083.10   71.13
  -4  -7   1 2047.24   86.84
   4   7  -1 2143.35  137.38
  -4  -7  -1 2308.21   82.76
   4  -7   1 2215.71   69.63
  -4   7   1 2103.81   69.76
   4   7   2 1828.90   97.64
  -4   7  -2 1739.96   91.32
   4  -7  -2 1742.52   97.93
  -4  -7  -2 1742.64   98.84
   4   7  -2 1586.98  103.46
   4  -7   2 1898.72   95.23
  -4   7   2 1795.76   87.57
   4   7   3 3889.91  189.78
  -4   7  -3 3742.99  170.55
   4  -7  -3 4008.58  170.55
   4   7  -3 3838.07  187.18
  -4  -7  -3 3770.87  190.45
   4  -7   3 3588.29  168.43
  -4   7   3 4027.57  171.88
   4   7   4 4547.60  220.90
  -4  -7   4 4449.49  200.22
  -4   7  -4 4845.10  215.79
   4  -7  -4 4709.47  199.60
  -4   7   4 4894.71  207.00
  -4  -7  -4 4487.64  198.99
   4  -7   4 4641.07  207.29
   4   7  -4 4884.45  223.96
   4   7   5 1214.26   79.74
  -4  -7   5 1198.36   81.37
  -4   7  -5 1269.67  132.82
   4  -7  -5 1263.40   49.84
  -4   7   5 1239.72   59.71
   4   7  -5 1416.33   96.31
   4  -7   5 1274.37   77.60
  -4  -7  -5 1092.65  106.34
  -4  -7   6  280.67   62.60
  -4   7  -6  259.60  108.46
   4  -7  -6  322.42   37.12
   4   7  -6  371.40   82.56
  -4   7   6  395.62   67.24
   4  -7   6  244.18   66.41
  -4  -7  -6  310.62   84.71
  -4   7  -7  754.79  153.27
  -4  -7  -7  694.38  140.93
   4   7  -7  687.64   70.53
  -4   7  -8  305.51   69.99
   4   7  -8  203.60   38.99
  -4   7  -9  459.41  131.19
  -4  -7  -9  273.96  102.98
   4   7  -9  524.59   55.64
  -4   7 -10 1213.45   80.92
  -4  -7 -10 1218.48   76.58
   4   7 -10 1248.82   82.84
  -4   7 -11  454.12   74.02
  -4  -7 -11  304.64  104.05
   4   7 -11  498.48   77.81
  -4  -7 -11  488.64   54.28
  -4   7 -12  577.01  161.36
  -4  -7 -12  317.95  134.31
   4   7 -12  577.37   74.82
  -4  -7 -12  571.22  111.64
  -4   7 -13  403.26  117.34
  -4  -7 -13  264.75  120.39
   4   7 -13  507.94   55.47
  -4  -7 -13  413.47  141.16
  -4   7 -14   17.54   25.34
   4   7 -14  111.72   53.36
  -4  -7 -14   31.74   21.53
  -4   7 -15  193.46   57.70
   4   7 -15  212.36   52.44
  -4  -7 -15  247.10   78.46
  -4   7 -16  939.38  102.98
   4   7 -16 1074.67  114.74
  -4  -7 -16 1008.68   94.66
  -4   7 -17  455.82  145.24
   4   7 -17  582.98   75.54
  -4  -7 -17  634.94  110.78
  -4   7 -18  239.24   63.45
   4   7 -18  236.02   71.17
  -4  -7 -18  120.89   86.11
  -4   7 -19  269.73  106.70
   4   7 -19  208.17   59.68
  -4   7 -20   58.90   40.02
  -4   7 -21  153.00   86.15
   4   8   0 3694.77  215.37
  -4  -8   0 3856.58  179.63
  -4   8   0 3728.71  172.05
   4  -8   0 3758.08  169.07
   4   8   1   59.02   32.17
  -4   8  -1   27.01   19.83
  -4  -8   1    8.89   15.58
   4  -8  -1   17.61   18.72
   4   8  -1   69.49   40.04
  -4   8   1    9.92    7.50
  -4  -8  -1   26.62   32.02
   4  -8   1   20.18   15.51
   4   8   2 1153.04   73.05
  -4   8  -2 1049.03   61.60
  -4  -8   2 1054.10   71.63
   4  -8  -2 1208.97   68.13
   4   8  -2 1136.73   91.82
  -4   8   2 1123.81   55.88
  -4  -8  -2 1092.35   66.32
   4  -8   2 1182.68   76.97
   4   8   3  511.33  119.59
  -4   8  -3  396.84   80.25
  -4  -8   3  416.01  138.71
   4  -8  -3  490.75   92.11
   4   8  -3  396.11  152.33
  -4   8   3  481.35   33.86
  -4  -8  -3  517.59   47.70
   4  -8   3  357.50   89.10
   4   8   4 1330.76   84.46
  -4   8  -4 1378.59   74.33
   4  -8  -4 1302.58   71.06
  -4  -8  -4 1471.58   76.68
   4   8  -4 1551.37  194.06
   4  -8   4 1419.11   75.69
  -4   8   4 1390.08   79.09
   4   8   5   31.17   14.32
  -4   8  -5   16.76   31.20
   4  -8  -5   22.89   12.85
   4   8  -5   41.73   31.41
  -4  -8  -5   -0.92   18.12
   4  -8   5   38.70   26.60
  -4   8   5   -3.16    6.87
   4   8   6 2291.89  131.05
  -4   8  -6 2300.49  129.69
   4  -8  -6 2279.70  110.42
   4   8  -6 2371.88  145.41
  -4  -8  -6 2112.92  122.16
  -4   8   6 2363.14  113.17
   4  -8  -7   63.23   14.14
  -4   8  -7   33.80   25.57
   4   8  -7   51.28   39.92
  -4  -8  -7   90.27   15.39
  -4   8  -8 1856.30  130.47
  -4  -8  -8 1932.01  125.68
   4   8  -8 2144.17  150.44
  -4   8  -9   43.56   37.27
   4   8  -9  215.41   60.96
  -4   8 -10  567.71   71.29
   4   8 -10  520.96   74.78
  -4   8 -11  190.95   92.70
   4   8 -11  260.95   53.86
  -4   8 -12  355.54  108.56
  -4  -8 -12  198.58  120.38
   4   8 -12  576.05   87.02
  -4  -8 -12  376.14   91.84
  -4   8 -13  148.26   76.41
  -4  -8 -13   77.21   36.15
   4   8 -13  138.73   57.07
  -4  -8 -13   96.72   34.21
  -4   8 -14   52.76   38.70
   4   8 -14   15.04   28.00
  -4  -8 -14   23.98   17.07
  -4   8 -15   32.76   33.88
   4   8 -15  144.01   52.30
  -4  -8 -15   59.08   32.98
  -4   8 -16   86.36   40.26
   4   8 -16   83.40   45.28
  -4  -8 -16   75.00   36.54
  -4   8 -17   34.70   40.53
   4   8 -17   32.93   32.68
  -4  -8 -17   17.38   10.90
  -4   8 -18  372.55   76.78
   4   8 -18  295.14   88.84
  -4   8 -19   28.03   49.94
   4   8 -19   53.14   49.92
  -4   8 -20  132.21   54.58
   4   8 -20  215.51   71.84
   4   9   0    1.36   24.36
  -4  -9   0   16.09   24.15
  -4   9   0   95.18   35.02
   4  -9   0   21.90   20.01
   4   9   1 4737.60  251.36
  -4   9  -1 4826.58  234.68
   4  -9  -1 4822.47  229.95
  -4   9   1 4526.34  222.66
   4   9  -1 4589.20  278.70
  -4  -9  -1 4842.97  239.68
   4  -9   1 4382.80  218.04
   4   9   2 3227.61  172.07
  -4   9  -2 3121.69  165.92
   4  -9  -2 3037.95  149.59
  -4   9   2 2995.80  153.39
   4   9  -2 2860.11  198.85
  -4  -9  -2 2978.35  163.00
   4  -9   2 3085.82  157.36
   4   9   3 4416.59  222.50
  -4   9  -3 4474.43  223.44
   4  -9  -3 4229.61  201.49
  -4   9   3 4349.09  208.67
   4   9  -3 3990.81  228.08
  -4  -9  -3 4280.54  217.33
   4  -9   3 4489.78  221.47
   4   9   4 4495.52  225.33
  -4   9  -4 4473.44  232.40
   4  -9  -4 4233.04  200.35
  -4  -9  -4 4358.40  217.43
   4   9  -4 3862.94  207.07
  -4   9   4 4387.74  206.73
   4   9   5 3020.01  183.40
  -4   9  -5 3159.67  204.09
   4  -9  -5 3057.10  174.57
  -4  -9  -5 2644.50  165.63
   4   9  -5 3024.83  189.76
  -4   9   5 3121.94  177.39
   4   9   6   67.19   18.67
  -4   9  -6   39.23   29.14
   4  -9  -6   39.77   10.03
   4   9  -6   93.51   48.60
  -4   9   6   88.32   19.56
  -4  -9  -6  137.43   40.82
  -4   9  -7 2784.94  130.37
   4  -9  -7 2665.53   85.08
   4   9  -7 2703.94  134.99
  -4   9   7 2753.26   83.05
  -4  -9  -7 2768.40  115.44
   4  -9  -8  121.24   16.04
  -4   9  -8  209.23   67.40
   4   9  -8   97.13   28.82
  -4  -9  -8  106.07   33.55
  -4   9  -9 1740.82  125.93
  -4  -9  -9 1722.00  119.07
   4   9  -9 1846.50  126.68
  -4   9 -10 2571.55  142.99
  -4  -9 -10 2724.07  123.06
   4   9 -10 2686.94  143.36
  -4   9 -11 1167.19   98.19
  -4  -9 -11  846.19  158.60
   4   9 -11 1075.44  101.81
  -4   9 -12  651.00   79.16
   4   9 -12  688.64   82.17
  -4   9 -13 1478.08  212.75
   4   9 -13 1691.89  133.48
  -4  -9 -13 1654.06  112.60
  -4   9 -14   68.20   57.43
   4   9 -14  186.88   50.51
  -4  -9 -14   77.24   41.27
  -4   9 -15  706.52   91.43
   4   9 -15  518.12   74.63
  -4  -9 -15  500.31   45.07
  -4   9 -16  274.84   69.12
   4   9 -16  378.37   92.41
  -4  -9 -16  309.58   87.72
  -4   9 -17  703.09  110.32
   4   9 -17  735.97  117.80
  -4  -9 -17  777.69   93.58
  -4   9 -18  363.67   76.72
   4   9 -18  380.49   77.02
  -4   9 -19   87.79   66.29
   4   9 -19  204.95   57.49
  -4   9 -20   15.40   41.32
   4  10   0 1615.05  111.27
  -4  10   0 1837.90  120.33
   4 -10   0 1821.43  118.20
   4  10   1   77.87   47.86
   4 -10  -1   81.30   31.01
  -4  10  -1  151.99   48.52
  -4  10   1   96.03   22.83
   4  10  -1   90.96   29.71
   4 -10   1  109.56   57.98
   4  10   2 1981.48  138.97
   4 -10  -2 2191.47  134.68
  -4  10  -2 1918.84  131.03
   4  10  -2 2168.82  144.14
   4 -10   2 2057.85  131.52
  -4  10   2 1959.50  124.41
   4  10   3   82.23   52.46
   4 -10  -3   37.92   15.39
  -4  10  -3  -15.46   27.62
  -4  10   3   45.49   26.00
   4  10  -3   10.91   39.16
   4  10   4   29.86   29.78
   4 -10  -4   14.59   18.91
  -4  10  -4    8.98   24.81
  -4  10   4   18.58   14.64
   4  10  -4   41.47   27.65
   4  10   5   76.93   31.28
   4 -10  -5   -1.07   12.15
  -4  10  -5   52.42   32.21
  -4  10   5   13.31   16.71
   4  10  -5   10.99   28.93
   4  10   6  322.39   75.46
   4 -10  -6  337.93   81.46
  -4  10  -6  414.11   63.33
   4  10  -6  386.55   65.63
  -4  10   6  250.10   53.43
   4  10   7   35.08   13.69
   4 -10  -7    1.57    5.41
  -4  10  -7   25.30   34.83
   4  10  -7   91.06   45.04
  -4  10   7    2.39    4.11
   4 -10  -8  141.38   27.54
  -4  10  -8  162.87   44.79
   4  10  -8  305.65   60.60
  -4  10   8  177.34   19.41
  -4  10  -9   60.24   48.73
   4  10  -9  121.26   54.70
  -4  10 -10  464.85   65.79
   4  10 -10  460.66   81.25
  -4  10 -11  335.30   79.73
   4  10 -11  362.05   72.30
  -4  10 -12  891.15   87.54
   4  10 -12 1174.01  113.29
  -4  10 -13   25.26   36.36
   4  10 -13  119.41   56.59
  -4 -10 -13   -9.72   22.44
  -4  10 -14  562.82   76.89
   4  10 -14  481.83   74.00
  -4 -10 -14  346.48  157.06
  -4  10 -15   23.88   37.68
   4  10 -15   74.58   52.68
  -4 -10 -15   33.91   17.18
  -4  10 -16   90.77   61.59
   4  10 -16   95.43   53.92
  -4 -10 -16   76.97   47.98
  -4  10 -17   13.75   31.10
   4  10 -17  -21.28   34.80
  -4  10 -18   48.73   38.15
   4  10 -18    4.75   38.86
  -4  10 -19   68.00   57.88
   4  10 -19  142.22   88.64
  -4  11   0   56.74   34.81
   4 -11   0   -1.89   16.70
   4  11   1 2935.13  130.62
   4 -11  -1 2646.19  105.80
  -4  11  -1 2756.26  118.77
  -4  11   1 2807.70  124.79
   4  11  -1 2810.46  127.76
   4  11   2   97.50   30.78
   4 -11  -2   53.96   32.46
  -4  11  -2  132.07   43.31
  -4  11   2  127.76   35.64
   4  11  -2   63.20   46.16
   4  11   3 2173.21  136.08
   4 -11  -3 2224.16  130.58
  -4  11  -3 2174.47  138.55
  -4  11   3 2199.29  128.76
   4  11  -3 2071.33  162.12
   4  11   4   48.96   34.44
  -4  11  -4   34.24   34.65
   4 -11  -4   20.04   21.20
   4  11  -4   43.56   12.57
   4  11   5 3195.90  218.50
   4 -11  -5 3099.90  169.49
  -4  11  -5 3314.51  198.99
  -4  11   5 3496.25  187.64
   4  11  -5 2924.31  174.91
   4  11   6    8.92   17.20
   4 -11  -6    1.26   11.53
  -4  11  -6   32.73   34.73
   4  11  -6   48.25   31.18
  -4  11   6   32.19   17.20
   4  11   7 1414.33   80.98
   4 -11  -7 1372.39   61.53
  -4  11  -7 1287.10   93.05
   4  11  -7 1239.77   82.24
  -4  11   7 1370.09   63.81
  -4  11  -8  383.42   58.59
   4 -11  -8  335.14   50.82
   4  11  -8  440.31  102.35
  -4  11  -9 1024.68   92.49
   4 -11  -9  930.22   57.09
   4  11  -9  992.22  106.02
  -4  11 -10  318.17  151.02
   4  11 -10  447.48   86.55
  -4  11 -11 1984.00  158.66
   4  11 -11 2179.02  168.48
  -4  11 -12  119.32   61.67
   4  11 -12  116.61   57.12
  -4  11 -13 1030.11  112.58
   4  11 -13 1216.98  121.02
  -4  11 -14  417.02   74.73
   4  11 -14  387.94   76.27
  -4  11 -15  683.03  106.48
   4  11 -15  528.24  101.97
  -4 -11 -15  180.12  109.59
  -4  11 -16  323.71   82.24
   4  11 -16   77.04   50.90
  -4  11 -17  211.39  111.23
   4  11 -17  619.46  101.47
  -4  11 -18   44.68   43.99
   4  11 -18   53.56   68.33
   4  12   0 1386.31  102.09
  -4  12   0 1480.92   93.29
   4  12   1  956.39  200.74
  -4  12  -1  833.97   74.54
   4  12  -1  987.16   76.99
  -4  12   1 1025.30   70.26
   4  12   2   33.85   26.90
   4 -12  -2   22.82   21.01
  -4  12  -2   24.67   29.25
  -4  12   2   -1.68   15.36
   4  12  -2   15.77   16.57
   4  12   3  453.62   96.89
   4 -12  -3  351.28   76.21
  -4  12  -3  377.24   76.15
  -4  12   3  380.79   41.34
   4  12  -3  487.39   91.08
   4  12   4 1138.60   76.40
   4 -12  -4 1149.58   62.83
  -4  12  -4 1356.87   92.72
  -4  12   4 1253.84   72.81
   4  12  -4 1189.63   92.92
   4  12   5  727.94  128.26
   4 -12  -5  505.89  105.46
  -4  12  -5  642.75  150.44
  -4  12   5  688.34   60.64
   4  12  -5  731.50  190.56
   4  12   6  137.14   58.09
   4 -12  -6   89.16   45.49
  -4  12  -6   48.43   31.94
  -4  12   6  143.00   38.01
   4  12  -6   92.80   60.57
   4  12   7   81.41   44.72
   4 -12  -7    6.22    6.88
  -4  12  -7  118.93   56.68
   4  12  -7    4.27   34.48
  -4  12   7    4.26    7.93
  -4  12  -8 1005.64  105.22
   4  12  -8  727.22   87.76
  -4  12  -9   33.68   33.63
   4  12  -9  114.69   63.66
  -4  12 -10   73.44   49.34
   4  12 -10   15.90   30.32
  -4  12 -11  254.38   67.39
   4  12 -11  165.03   48.60
  -4  12 -12   62.04   49.81
   4  12 -12  121.05   50.94
  -4  12 -13  130.35   49.19
   4  12 -13  280.08   84.25
  -4  12 -14   75.28   45.84
   4  12 -14  -33.58   39.01
  -4 -12 -14   26.86   21.78
  -4  12 -15   31.23   42.91
   4  12 -15   58.89   58.68
  -4  12 -16   37.97   41.50
   4  12 -16   64.92   47.56
  -4  12 -17   61.26   90.52
   4  12 -17   54.53   38.13
   4  13   0   24.20   18.35
  -4  13   0    7.09   20.82
   4  13   1  634.99  146.90
  -4  13  -1  544.51   75.57
   4  13  -1  563.21   73.01
  -4  13   1  521.25   60.14
   4  13   2  391.08  150.52
  -4  13  -2  415.49  125.52
   4  13  -2  566.08  161.31
  -4  13   2  584.23   63.27
   4  13   3 1595.64  134.22
  -4  13  -3 1553.88  115.39
   4  13  -3 1574.94  137.92
  -4  13   3 1441.98   95.57
   4  13   4  377.99  145.73
  -4  13  -4  638.64  154.68
   4  13  -4  473.24  107.37
  -4  13   4  611.79   56.71
   4  13   5 1353.81   95.91
  -4  13  -5 1659.18  140.02
  -4  13   5 1315.43   83.46
   4  13  -5 1119.66   98.25
   4  13   6   75.56   37.28
  -4  13  -6   75.57   56.51
   4  13  -6  131.99   44.30
  -4  13   6   25.20   19.56
   4  13   7   79.69   52.55
  -4  13  -7  153.34   57.93
  -4  13   7   80.52   35.10
   4  13  -7   70.26   56.20
   4  13   8   86.32   52.80
  -4  13  -8  168.88   68.91
   4  13  -8  129.53   57.59
  -4  13  -9  172.54   65.36
   4  13  -9  236.24   61.96
  -4  13 -10  119.75   81.02
   4  13 -10  204.57   65.25
  -4  13 -11  617.27  252.03
   4  13 -11 1115.28  105.50
  -4  13 -12   43.66   40.14
   4  13 -12  319.98   73.30
  -4  13 -13  214.55  131.57
   4  13 -13  441.86   99.16
  -4  13 -14   29.89   37.16
   4  13 -14   42.28   39.26
  -4  13 -15   44.71   61.14
   4  13 -15   49.15   36.11
  -4  13 -16  104.85   96.31
   4  13 -16  315.22  106.26
   4  14   0 1759.56  143.30
  -4  14   0 1526.16  117.49
   4  14   1   55.13   40.39
  -4  14  -1   16.23   29.24
   4  14  -1   74.19   42.04
  -4  14   1   60.45   38.16
   4  14   2  217.68   46.48
  -4  14  -2  177.31   39.07
   4  14  -2  224.32   71.28
  -4  14   2  317.77   70.40
   4  14   3   37.76   48.51
  -4  14  -3   17.68   31.63
   4  14  -3  112.31   50.94
  -4  14   3   51.82   27.05
   4  14   4   24.90   29.60
  -4  14  -4   30.22   32.65
   4  14  -4   62.34   35.97
  -4  14   4   61.53   36.94
   4  14   5  195.11   70.09
   4  14  -5   73.67   34.15
  -4  14   5   75.88   42.29
   4  14   6  254.71   95.76
  -4  14  -6  479.44  110.45
   4  14  -6  326.25   78.79
  -4  14   6  267.93   86.09
   4  14   7   26.59   27.02
  -4  14  -7   45.86   40.54
  -4  14   7   38.35   19.96
   4  14  -7   60.70   49.10
   4  14   8  217.33  155.80
  -4  14  -8  281.79   84.97
   4  14  -8  493.10   91.88
  -4  14  -9   36.49   37.97
   4  14  -9   85.58   59.12
  -4  14 -10   87.67   55.26
   4  14 -10  117.31   69.58
  -4  14 -11  142.07   51.35
   4  14 -11  122.91   67.71
  -4  14 -12  420.70  164.98
   4  14 -12  693.48   96.69
  -4  14 -13  109.66   82.67
   4  14 -13  158.73  101.32
  -4  14 -14   40.56   42.41
   4  14 -14  178.50   59.21
  -4  14 -15   14.01   23.29
   4  14 -15   34.19   42.04
   4  15   0   16.98   30.52
  -4  15   0   50.49   29.27
   4  15   1  280.83   75.43
  -4  15  -1  155.11   67.29
   4  15  -1  149.50   49.03
  -4  15   1  141.61   51.67
   4  15   2   53.18   51.72
  -4  15  -2   -3.08   29.04
   4  15  -2   52.42   29.91
  -4  15   2   73.99   50.06
   4  15   3  125.33   50.10
  -4  15  -3  158.14   49.65
   4  15  -3   87.75   29.35
  -4  15   3  134.05   55.09
  -4  15  -4  124.30   40.25
  -4  15   4  161.46   74.46
   4  15  -4  236.92   68.18
   4  15   5   -2.02   22.68
  -4  15  -5   60.73   55.65
   4  15  -5   65.87   50.75
  -4  15   5   74.85   53.39
   4  15   6   18.36   22.56
  -4  15  -6   58.21   48.38
   4  15  -6   55.24   40.37
   4  15   7   22.14   24.24
  -4  15  -7   -1.93   38.61
   4  15  -7  140.89   41.07
   4  15   8  218.14  110.14
  -4  15  -8  373.72   84.72
  -4  15  -9   43.53   47.31
   4  15  -9   67.58   58.06
  -4  15 -10   -5.93   19.51
   4  15 -10   54.76   59.82
  -4  15 -11  111.95   72.21
   4  15 -11   21.76   39.01
  -4  15 -12   38.74   57.43
   4  15 -12   61.92   74.48
  -4  15 -13   67.87   62.38
   4  15 -13  197.88   95.38
   4  16   0  599.94  162.34
  -4  16   0  691.22   79.64
   4  16   1   42.05   39.72
  -4  16  -1   31.62   30.01
   4  16  -1   40.64   19.72
   4  16   2    7.34   28.07
   4  16  -2   46.56   34.11
  -4  16   2  108.40   58.17
  -4  16  -3  137.68   84.69
  -4  16   3  288.76   63.00
   4  16  -3  222.64   46.35
   4  16   4   30.43   32.82
  -4  16  -4   41.89   45.91
  -4  16   4   60.28   30.36
   4  16  -4  142.57   46.35
   4  16   5   34.15   29.02
  -4  16  -5   35.24   17.37
   4  16  -5   69.62   34.23
   4  16   6   62.98   42.72
  -4  16  -6   71.39   54.26
   4  16  -6  105.39   45.73
   4  16   7  114.65   64.65
  -4  16  -7  130.79   73.64
   4  16  -7   84.47   39.15
   4  16   8   45.60   26.65
  -4  16  -8  162.10   76.97
   4  16  -8   32.77   32.80
  -4  16  -9    2.55   37.51
   4  16  -9   71.82   33.73
   4  16 -10   36.36   35.21
  -4  16 -11  110.99   67.58
   4  16 -11   73.92   35.82
   4  17   0   93.74   45.98
  -4  17   0   30.84   41.74
   4  17   1   20.79   25.10
   4  17  -1   18.80   20.09
  -4  17   1   71.91   44.44
  -4  17  -2  132.81   75.43
   4  17  -2  157.04   50.99
   4  17   3   39.83   41.18
  -4  17  -3  208.23   73.23
  -4  17   3  143.83   49.28
   4  17  -3   96.34   38.34
   4  17   4   40.72   37.24
  -4  17  -4   21.50   23.87
   4  17  -4  131.85   44.22
   4  17   5  103.64   40.50
  -4  17  -5  109.19   61.81
   4  17  -5  130.69   75.53
   4  17   6   14.32   22.00
  -4  17  -6   26.56   29.78
   4  17  -6  -16.63   44.22
   4  17   7   98.54   41.56
  -4  17  -7  126.38   57.40
   4  17  -7  121.53   51.33
   4  17   8   11.05   31.07
  -4  17  -8    8.73   44.61
   4  17  -8   33.95   41.09
   4  18   0  101.38   51.57
  -4  18   0  233.00   92.37
   4  18   1   50.86   57.32
  -4  18  -1   -5.14   32.89
   4  18  -1   58.81   33.29
   4  18   2   79.17   41.64
   4  18  -2   25.73   41.64
   4  18   3   53.51   37.07
  -4  18  -3   60.06   55.38
   4  18  -3   36.48   20.93
   4  18   4   94.47   71.21
  -4  18  -4   88.88   52.30
   4  18  -4  192.20   85.75
  -5   0   0   30.89   14.46
  -5   0   1   18.99   12.69
  -5   0   2   72.22   25.49
   5   0  -3   27.26   14.57
  -5   0   3   16.51   16.74
  -5   0  -3   -3.54   24.58
   5   0  -4 2308.21   77.84
  -5   0   4 2272.60   71.63
  -5   0  -4 2296.18   89.51
   5   0  -5   24.09   24.97
  -5   0   5   15.47   12.89
  -5   0  -5   45.08   23.68
   5   0  -6 1302.67   79.01
  -5   0   6 1259.81   52.74
  -5   0  -6 1346.53   95.28
   5   0  -7    6.84    8.93
  -5   0   7    9.74    9.87
  -5   0  -7   31.53   29.24
   5   0  -8  318.25   62.94
  -5   0   8  314.40   39.69
  -5   0  -8  442.89   89.74
   5   0  -9   23.34   17.74
  -5   0   9    5.19    6.14
  -5   0  -9   22.13   23.33
   5   0 -10  948.56   53.40
  -5   0  10  983.69   59.20
  -5   0 -10  839.36   70.08
   5   0 -11   10.63   13.02
  -5   0  11   14.89   11.58
  -5   0 -11   62.59   37.58
   5   0 -12  518.74   58.40
  -5   0  12  481.18   87.92
  -5   0 -12  481.19   65.15
   5   0 -13   -1.22   13.57
  -5   0  13    7.45   13.60
  -5   0 -13   47.49   42.84
   5   0 -14 1019.67   72.79
  -5   0 -14 1053.54  108.70
  -5   0  14  891.56  105.21
   5   0 -15   -2.53   14.97
  -5   0  15   29.20   21.35
  -5   0 -15   34.32   37.06
   5   0 -16 1808.95  120.91
  -5   0 -16 1655.79  130.23
  -5   0  16 1639.87  123.24
   5   0 -17   -8.05   13.39
  -5   0 -17   22.35   32.10
   5   0 -18   10.93   15.42
  -5   0 -18   20.68   38.15
  -5   0 -19   70.96   52.06
  -5   0 -20  221.24  151.41
  -5   0 -21   43.75   21.46
  -5   0 -22  232.62  141.61
  -5  -1   0 1255.88   50.25
  -5   1  -1  273.67   39.04
  -5  -1   1  248.01   34.00
   5   1  -1  209.55   27.86
  -5  -1  -1  265.69   70.61
  -5  -1   2  192.00   71.37
  -5   1  -2  293.84   79.35
  -5  -1  -2  247.29   73.93
  -5   1   2  235.81   68.14
   5   1  -2  176.16   53.06
  -5   1  -3 1587.33  103.99
  -5  -1   3 1576.77   62.30
  -5   1   3 1512.41   53.21
   5   1  -3 1512.61   57.67
  -5   1  -4 6509.26  184.19
  -5  -1   4 6108.42  175.41
  -5   1   4 6573.41  179.24
   5   1  -4 6228.41  194.02
   5  -1  -5  195.22   51.08
  -5   1  -5  133.62   75.37
  -5  -1   5  165.02   29.68
  -5   1   5  192.99   44.82
   5   1  -5  144.98   40.68
  -5  -1  -5  161.70   37.39
   5  -1  -6 3132.46   88.98
  -5   1  -6 3228.88  116.09
  -5  -1   6 3227.00  102.14
  -5   1   6 3240.77   93.01
   5   1  -6 3161.01   98.25
  -5  -1  -6 3144.52  112.58
   5  -1   6 3294.89  110.77
  -5   1  -7   36.18   18.23
  -5  -1   7   52.68   23.73
  -5   1   7   41.46   17.16
   5   1  -7   23.09   19.18
  -5  -1  -7   28.87   33.01
   5  -1   7   -3.35   18.89
   5  -1  -8 3531.81   83.53
  -5  -1   8 3378.25  106.21
  -5   1  -8 3597.98  107.41
  -5   1   8 3324.09   74.71
  -5  -1  -8 3345.33  108.73
   5  -1   8 3403.94   97.64
   5  -1  -9    3.23    7.55
  -5   1  -9   32.03   44.48
  -5  -1   9   19.62   14.98
  -5   1   9   18.32   13.13
   5   1  -9   12.06   18.54
  -5  -1  -9   50.52   28.78
   5  -1   9   19.37   19.27
   5  -1 -10  214.59   50.95
  -5   1 -10  231.15   59.35
  -5  -1  10  213.44   38.60
  -5   1  10  235.25   36.85
   5   1 -10  216.96   34.07
  -5  -1 -10  209.97   46.21
   5  -1  10  163.12   64.64
   5  -1 -11  139.72   48.44
  -5  -1  11  198.77   58.31
  -5   1 -11  209.11   46.94
  -5   1  11  254.86   60.86
  -5  -1 -11  166.06   29.08
   5  -1 -12  211.56   55.38
  -5  -1  12  172.51   40.69
  -5   1 -12  288.18   76.61
   5   1 -12  203.32   32.39
  -5   1  12  181.52   62.19
  -5  -1 -12  262.10   61.18
   5  -1 -13  570.91   52.62
  -5   1 -13  683.70   96.73
  -5  -1  13  539.39  124.13
  -5   1  13  664.00   68.88
   5   1 -13  621.03  124.14
  -5  -1 -13  640.05  172.04
   5  -1 -14   49.40   17.10
  -5   1 -14   53.07   53.45
  -5  -1  14   35.76   17.91
  -5  -1 -14   31.32   26.33
   5   1 -14   96.71   38.04
  -5   1  14   21.85   18.32
   5  -1 -15   94.14   33.58
  -5  -1  15   28.74   18.30
  -5   1 -15   97.64   50.13
  -5  -1 -15   44.43   24.75
   5   1 -15   68.27   37.57
   5  -1 -16  407.79   68.43
  -5   1 -16  476.89   70.78
  -5  -1  16  221.32   97.86
  -5  -1 -16  310.79  111.84
   5   1 -16  395.87   49.79
  -5   1  16  283.90   79.00
   5  -1 -17  187.40   30.79
  -5   1 -17  190.83   60.73
   5   1 -17  152.78   39.25
  -5  -1 -17   99.44   49.93
   5  -1 -18  138.22   71.99
  -5   1 -18  291.74   48.12
   5   1 -18  334.30   51.63
  -5  -1 -18  205.80   98.55
   5  -1 -19    5.65   15.22
  -5   1 -19   73.47   49.10
   5   1 -19   35.75   39.08
  -5  -1 -19   60.28   40.56
  -5   1 -20  480.36  214.91
  -5  -1 -20  386.78   78.06
  -5   1 -21   21.24   33.36
  -5  -1 -21   33.48   34.80
  -5   1 -22   20.00   18.65
  -5  -1 -22   -3.52   32.18
   5   2   0   -1.64   21.69
  -5  -2   0   23.53   25.03
  -5   2   0   33.44   20.34
  -5  -2   1 3477.39  120.87
   5   2  -1 3409.14  107.36
  -5  -2  -1 3530.48  110.02
  -5   2   1 3593.21  103.71
  -5   2  -2 2366.23   81.51
  -5  -2   2 2556.36   92.86
   5   2  -2 2568.73  158.67
  -5  -2  -2 2455.38  122.17
   5  -2   2 2581.27   84.46
  -5   2   2 2502.40   76.89
  -5  -2   3  388.40   38.99
  -5   2  -3  386.92   44.27
   5   2  -3  388.84   43.13
  -5   2   3  389.01   35.20
  -5  -2  -3  395.49   79.55
   5  -2   3  431.64   84.81
  -5  -2   4 1275.73   59.83
  -5   2  -4 1278.46   61.86
  -5   2   4 1143.42   47.55
  -5  -2  -4 1332.58   63.46
   5   2  -4 1148.34   59.17
   5  -2   4 1238.54   92.27
  -5   2  -5 3864.12  127.37
  -5  -2   5 3676.47  113.58
  -5   2   5 3790.34  103.41
   5   2  -5 3626.62  124.31
   5  -2   5 4125.62  125.97
  -5   2  -6  148.91   32.83
  -5  -2   6  127.92   34.98
  -5   2   6  111.16   13.95
   5   2  -6  107.63   32.12
   5  -2   6   78.12   18.72
  -5  -2  -6  160.61   27.94
  -5   2  -7 1931.79  102.66
  -5  -2   7 2286.10   83.41
  -5   2   7 2097.76   48.92
   5   2  -7 2286.82  154.96
   5  -2   7 2209.21   86.86
  -5  -2  -7 2209.88  158.30
   5  -2  -8  366.34   40.05
  -5   2  -8  266.04   31.86
  -5  -2   8  322.49   73.66
  -5   2   8  307.63   26.03
   5   2  -8  303.16   71.49
  -5  -2  -8  358.21   92.37
   5  -2   8  324.88   30.78
  -5   2  -9  211.46   65.69
  -5  -2   9  278.49   36.72
  -5   2   9  248.40   30.75
   5   2  -9  321.60   71.77
   5  -2   9  192.94   25.89
  -5  -2  -9  302.84   47.69
  -5   2 -10 1018.46   69.58
  -5  -2  10  943.03  100.79
  -5   2  10  940.57   44.38
   5   2 -10 1029.68   65.04
   5  -2  10  890.67   68.35
  -5  -2 -10  927.75   69.00
   5  -2 -11  439.14   24.76
  -5   2 -11  583.99  131.97
  -5  -2  11  389.16   31.49
  -5   2  11  432.79   22.47
   5   2 -11  490.73   53.65
  -5  -2 -11  462.69   50.90
   5  -2 -12  142.22   36.02
  -5  -2  12  123.80   48.42
  -5   2 -12  103.59   60.24
   5   2 -12  155.32   31.38
  -5   2  12  190.08   40.60
  -5  -2 -12  184.93   52.51
   5  -2 -13  180.13   53.30
  -5  -2  13  115.46   37.87
  -5   2 -13  231.08   51.79
   5   2 -13  128.19   28.89
  -5   2  13  141.81   41.58
  -5  -2 -13  116.29   58.12
   5  -2 -14   76.51   21.64
  -5  -2  14   11.92   17.64
  -5   2 -14   74.43   49.38
   5   2 -14   22.36   17.63
  -5   2  14   22.89    6.10
  -5  -2 -14   57.68   24.00
   5  -2 -15 1083.70   55.14
  -5   2 -15 1162.05  170.21
   5   2 -15 1193.97   81.05
  -5   2  15 1021.09   46.51
  -5  -2 -15 1168.22   78.57
   5  -2 -16  708.85   66.26
  -5   2 -16  507.91  102.24
   5   2 -16  711.96   71.46
  -5  -2 -16  735.86  108.73
  -5   2  16  617.44   86.47
   5  -2 -17  106.43   36.32
  -5   2 -17  144.45   50.65
   5   2 -17  162.97   41.93
  -5  -2 -17  146.70   62.77
   5  -2 -18  104.91   39.53
  -5   2 -18  177.33   93.69
   5   2 -18  238.03   55.01
  -5  -2 -18  178.82   56.19
  -5   2 -19   35.95   29.00
   5   2 -19   69.15   40.80
  -5  -2 -19   31.56   28.93
  -5   2 -20   94.31   36.62
  -5  -2 -20   95.87   60.06
  -5   2 -21   29.70   22.41
  -5  -2 -21   45.02   35.71
  -5   2 -22   71.32   77.73
  -5  -2 -22  162.62   61.29
   5   3   014846.48  371.62
  -5  -3   014347.04  361.80
  -5   3   015006.83  369.05
   5  -3   014364.19  353.51
   5   3   1  531.20   52.90
  -5   3  -1  532.10   70.64
  -5  -3   1  546.75   52.15
  -5  -3  -1  693.98   62.53
  -5   3   1  448.08   42.55
   5   3  -1  486.53   47.47
   5  -3   1  493.52   70.90
  -5   3  -2 7363.19  200.58
  -5  -3   2 7722.42  210.76
  -5  -3  -2 7927.95  217.19
   5   3  -2 7713.25  215.69
  -5   3   2 7423.99  194.17
   5  -3   2 7583.76  205.83
  -5   3  -3   74.37   29.11
  -5  -3   3   89.42   23.21
   5   3  -3  125.73   40.78
  -5  -3  -3  103.01   24.65
  -5   3   3  128.36   34.99
   5  -3   3   77.23   32.24
  -5  -3   4 5753.87  163.13
  -5   3  -4 5631.34  166.63
   5   3  -4 5693.54  193.86
  -5  -3  -4 5545.77  168.13
  -5   3   4 5945.27  152.01
   5  -3   4 5989.97  168.28
  -5   3   4 5808.49  146.89
  -5  -3   5 1516.66   64.03
  -5   3  -5 1792.16   78.33
   5   3  -5 1686.33  122.04
  -5  -3  -5 1666.66   74.04
  -5   3   5 1598.92   53.84
   5  -3   5 1742.50   78.45
  -5   3   5 1543.23   52.02
  -5  -3   6 3470.55   97.29
  -5   3  -6 3497.18  101.35
  -5   3   6 3490.22   67.92
  -5  -3  -6 3492.92  103.43
   5   3  -6 3264.09  115.54
  -5   3   6 3234.29   62.41
  -5   3  -7   16.92   29.57
  -5  -3   7   -2.36   17.53
  -5   3   7    1.55    3.59
   5   3  -7   15.96   20.78
   5  -3   7   -0.64   16.72
  -5   3   7    0.22    4.94
  -5   3  -8  282.06   75.25
  -5  -3   8  298.45   56.53
  -5   3   8  285.54   16.90
   5   3  -8  266.81   74.73
   5  -3   8  324.38   54.12
  -5  -3  -8  251.19  132.88
  -5  -3   9   23.04   18.57
  -5   3  -9   45.78   38.04
   5   3  -9   35.69   33.77
  -5   3   9    3.84    4.16
  -5  -3  -9   43.26   30.17
  -5  -3  10 4875.25  235.60
  -5   3 -10 4508.33  242.13
   5   3 -10 4588.73  226.81
  -5   3  10 5222.69  229.68
  -5  -3 -10 4832.32  236.84
  -5  -3  11  123.31   33.17
  -5   3 -11   97.74   44.53
   5   3 -11   88.06   32.37
  -5  -3 -11  142.25   33.45
   5  -3 -12 5232.69  281.29
  -5  -3  12 5285.39  301.72
  -5   3 -12 4676.59  314.83
   5   3 -12 4600.57  270.85
  -5  -3 -12 4798.14  289.23
  -5  -3  13  353.58   90.27
  -5   3 -13  454.54   93.71
   5   3 -13  438.95   61.61
  -5  -3 -13  403.35  111.65
  -5   3  13  406.59   33.55
  -5  -3  14  881.29  220.72
  -5   3 -14 1251.31  168.37
   5   3 -14 1390.79  102.70
  -5  -3 -14 1250.02  143.20
  -5   3  14 1343.41   69.84
  -5   3 -15   81.28   56.71
   5   3 -15   94.88   46.42
  -5  -3 -15   73.72   39.42
  -5   3 -16  265.25   53.17
   5   3 -16  275.77   46.47
  -5  -3 -16  309.70  118.27
  -5   3 -17  117.35   52.04
   5   3 -17   92.33   45.19
  -5  -3 -17   24.19   15.66
  -5   3 -18  200.88   90.54
   5   3 -18  273.93   53.17
  -5  -3 -18  126.48   58.73
  -5   3 -19   58.61   42.41
   5   3 -19   57.00   39.96
  -5  -3 -19   97.75   52.81
  -5   3 -20  102.36   35.19
  -5  -3 -20   45.50   36.42
  -5   3 -21   26.90   20.66
  -5  -3 -21    0.64   22.38
  -5   3 -22  106.72   50.62
  -5  -3 -22  230.85   73.93
   5   4   0   25.97   25.56
  -5  -4   0    5.32   19.91
  -5   4   0   31.45   25.55
   5  -4   0   -5.89   14.99
   5   4   1  788.78   69.39
  -5   4  -1  743.91   68.03
  -5  -4   1  810.93   90.49
   5  -4  -1  885.93   41.65
  -5  -4  -1  922.21   88.93
   5   4  -1  968.05   86.54
  -5   4   1  824.64   53.27
   5  -4   1  884.93   48.39
   5   4   2  148.23   33.01
  -5   4  -2  219.19   78.89
  -5  -4   2  170.47   35.15
  -5  -4  -2  159.41   34.43
   5   4  -2  130.21   43.14
  -5   4   2  145.17   36.77
   5  -4   2  163.76   37.78
  -5   4  -3 1110.37   61.27
  -5  -4   3 1148.23   57.63
   5   4  -3 1264.96  159.70
  -5  -4  -3 1300.28   67.94
  -5   4   3 1233.72   47.52
   5  -4   3 1138.62   55.66
  -5   4  -4  753.75  111.84
  -5  -4   4  605.51   48.54
   5   4  -4  649.35   47.44
  -5  -4  -4  598.28   46.11
  -5   4   4  609.52   27.88
   5  -4   4  736.23  131.79
  -5  -4   5 3881.84  109.53
  -5   4  -5 3440.96  120.76
  -5  -4  -5 3820.76  101.51
  -5   4   5 4006.18   76.80
  -5   4   5 3698.07   73.23
   5   4  -5 4023.46  213.22
   5  -4   5 3686.06  104.14
  -5  -4   6  703.18   49.20
  -5   4  -6  722.70   53.93
  -5   4   6  797.54   24.08
  -5  -4  -6  848.83   48.76
   5   4  -6  917.17   76.26
   5  -4   6  818.05   47.67
  -5   4  -7  363.33   95.25
  -5  -4   7  273.59   34.16
   5   4  -7  310.37   44.01
  -5  -4  -7  258.09   72.87
   5  -4   7  163.94   75.46
  -5   4  -8  874.75   61.75
  -5  -4   8  745.86   87.07
   5   4  -8  747.57   65.04
  -5  -4  -8  777.51   48.24
   5  -4   8  725.72   56.08
  -5   4  -9  215.18   61.27
  -5  -4   9  160.78   27.44
   5   4  -9  203.97   40.89
  -5  -4  -9  132.15   39.16
  -5  -4  -9  232.65   71.00
  -5   4 -10 1133.09   91.72
  -5  -4  10 1223.79   81.89
   5   4 -10 1085.18   77.06
  -5  -4 -10 1063.48   73.83
  -5  -4 -10  984.01  200.44
  -5   4 -11   91.84   46.24
  -5  -4  11   70.64   28.79
   5   4 -11   38.43   23.54
  -5  -4 -11   60.22   27.86
  -5  -4 -11   77.22   46.87
  -5  -4  12    5.21   10.03
  -5   4 -12   40.35   28.02
   5   4 -12  129.38   43.80
  -5  -4 -12   32.33   21.66
  -5   4 -13  -10.79   34.63
   5   4 -13   48.87   32.29
  -5  -4 -13   11.78   25.22
  -5   4 -14 1118.80  100.60
   5   4 -14  991.36   79.01
  -5  -4 -14 1082.07  153.99
  -5   4 -15  203.34   67.83
   5   4 -15  295.41   58.82
  -5  -4 -15  232.52   72.09
  -5   4 -16  235.84   83.51
   5   4 -16  250.44   43.66
  -5  -4 -16  199.61   93.00
  -5   4 -17   89.73   40.48
  -5  -4 -17   30.01   27.69
  -5   4 -18   25.82   43.57
   5   4 -18  120.13   48.34
  -5  -4 -18   41.73   22.71
  -5   4 -19   40.57   18.13
  -5  -4 -19   30.74   24.16
  -5   4 -20  268.40   66.91
   5   4 -20  126.26   48.35
  -5  -4 -20   92.85   79.88
  -5   4 -21   26.70   23.24
   5   4 -21   10.80   39.90
  -5  -4 -21   49.93   33.40
   5   4 -22  302.17  100.01
  -5  -4 -22   81.74   71.61
   5   5   0   60.02   31.95
  -5  -5   0   63.13   23.69
  -5   5   0   70.56   28.71
   5  -5   0   67.10   25.12
   5   5   1   62.34   38.43
  -5   5  -1  170.18   47.70
  -5  -5   1  117.90   25.93
   5  -5  -1   99.79   30.16
  -5  -5  -1   98.22   21.50
  -5   5   1  164.26   34.69
   5  -5   1   83.28   25.40
   5   5  -1   79.68   46.70
   5   5   2  682.54   46.63
  -5   5  -2  768.69   60.07
  -5  -5   2  742.50   48.66
   5  -5  -2  818.55   38.08
  -5  -5  -2  812.44   66.47
  -5   5   2  807.17   64.90
   5  -5   2  751.96   44.93
   5   5  -2  767.57   50.67
   5   5   3  191.61   61.49
  -5   5  -3  203.33   58.13
  -5  -5   3  188.68   33.69
   5  -5  -3  215.57   50.01
   5   5  -3  223.02   57.04
  -5   5   3  197.25   55.03
   5  -5   3  217.48   61.01
  -5  -5  -3  202.54   58.33
  -5   5  -430995.27  525.60
  -5  -5   431928.25  237.53
  -5   5   431546.57  485.15
  -5  -5  -432005.60  234.39
   5  -5   431910.64  251.82
  -5   5  -5   21.71   20.00
   5   5  -5   14.16   18.78
  -5   5   5   25.99   12.62
  -5  -5  -5   20.59   25.43
   5  -5   5   17.77   22.01
  -5   5  -6 6486.48  282.32
  -5  -5   6 6152.81  268.11
   5   5  -6 6113.72  295.01
  -5  -5  -6 6251.94  291.96
   5  -5   6 6246.58  276.03
  -5   5  -7   50.65   38.08
  -5  -5  -7   11.07   13.24
   5   5  -7   17.81   36.65
   5  -5   7   10.74   15.81
  -5   5  -8 7052.79  294.30
  -5  -5   8 7338.98  260.38
   5   5  -8 7541.57  270.90
  -5  -5  -8 6947.50  244.59
  -5   5  -9  103.13   41.32
  -5  -5   9   73.47   29.62
   5   5  -9  125.38   43.88
  -5  -5  -9  106.85   52.04
  -5   5 -10 2702.89  171.89
  -5  -5 -10 2467.72  151.43
   5   5 -10 2609.53  173.18
  -5  -5 -10 2655.36  163.29
  -5   5 -11  106.25   36.71
  -5  -5 -11   19.39   20.31
   5   5 -11   42.71   36.16
  -5  -5 -11   69.01   34.05
  -5   5 -12 1238.59  151.59
   5   5 -12 1075.74   83.13
  -5  -5 -12 1240.79  120.53
  -5   5 -13  172.69   53.63
   5   5 -13  156.93   41.81
  -5  -5 -13  228.44   50.60
  -5   5 -14   50.71   50.71
   5   5 -14  103.97   53.51
  -5  -5 -14   33.29   22.89
  -5   5 -15   42.71   18.51
   5   5 -15   -5.17   23.47
  -5  -5 -15   22.76   20.39
  -5   5 -16 1129.45  200.14
   5   5 -16 1188.06   98.91
  -5  -5 -16  963.65  101.80
  -5   5 -17   30.97   30.62
   5   5 -17   -1.12   24.42
  -5  -5 -17   34.46   43.45
  -5   5 -18 1874.76  129.34
   5   5 -18 2114.12  144.04
  -5  -5 -18 2131.76  132.90
  -5   5 -19    0.19   39.50
   5   5 -19    9.33   30.33
  -5  -5 -19   65.37   26.30
  -5   5 -20 1442.42  530.81
  -5   5 -21   25.40   29.44
   5   5 -21   67.17   52.32
  -5  -5 -21   27.38   21.53
  -5   5 -22   91.25   74.33
   5   6   0    8.71   19.68
  -5  -6   0   29.60   22.58
  -5   6   0    2.49   16.41
   5  -6   0   28.19   17.15
   5   6   1   17.08   22.34
  -5   6  -1   17.55   22.00
  -5  -6   1    7.53   22.94
   5  -6  -1   20.63    9.98
  -5  -6  -1    5.70   16.97
  -5   6   1   24.60   17.95
   5  -6   1   27.08   18.05
   5   6  -1   28.50   15.24
   5   6   2  544.37   60.52
  -5   6  -2  651.28   49.64
  -5  -6   2  584.83   52.38
   5  -6  -2  490.07   30.59
  -5  -6  -2  487.91   89.85
  -5   6   2  579.92   60.66
   5  -6   2  615.76  112.95
   5   6  -2  439.81  109.31
   5   6   3  266.72   58.91
  -5   6  -3  181.12   30.73
  -5  -6   3  226.14   32.51
   5  -6  -3  261.61   51.75
   5   6  -3  284.82   66.89
  -5   6   3  272.59   64.87
   5  -6   3  203.18   54.71
  -5  -6  -3  205.32   43.60
   5   6   4 1573.77   88.61
  -5   6  -4 1523.54   87.67
  -5  -6   4 1425.29  217.22
   5  -6  -4 1513.51   69.26
   5   6  -4 1534.77  176.37
  -5   6   4 1419.36   73.35
   5  -6   4 1495.13   82.28
  -5  -6  -4 1489.99  206.02
  -5   6  -5   56.88   26.18
  -5  -6   5   87.81   38.47
  -5  -6  -5   -6.40   21.53
  -5   6   5   40.85    8.65
   5   6  -5   37.26   44.16
   5  -6   5   50.90   16.35
  -5   6  -6  471.02   47.46
  -5  -6   6  479.91   96.31
   5   6  -6  509.68  124.70
  -5  -6  -6  503.81  122.63
   5  -6   6  454.10   43.24
  -5   6  -7  124.52   36.15
  -5  -6   7   65.71   31.92
   5   6  -7  146.77   47.34
  -5  -6  -7   76.87   21.47
  -5   6  -8 1966.22  118.20
  -5  -6  -8 2142.53  124.31
   5   6  -8 1987.12  117.72
  -5   6  -9   98.02   39.57
  -5  -6  -9   34.28   31.42
   5   6  -9   55.38   44.30
  -5   6 -10 1665.58  117.53
  -5  -6 -10 1592.16  145.75
   5   6 -10 1932.38  138.06
  -5   6 -11   17.49   37.60
   5   6 -11  122.61   53.83
  -5  -6 -11    8.81   20.29
  -5   6 -12  807.04  183.92
   5   6 -12  598.62   81.12
  -5  -6 -12  633.91   80.11
  -5   6 -13   12.14   32.58
   5   6 -13   64.67   47.72
  -5  -6 -13   34.70   26.38
  -5   6 -14  760.36  134.26
   5   6 -14  906.77  110.62
  -5  -6 -14  665.91   87.01
  -5   6 -15   13.57   17.53
   5   6 -15   69.08   41.50
  -5  -6 -15   38.64   27.33
  -5   6 -16  954.44  117.07
   5   6 -16  937.48   96.28
  -5  -6 -16  886.15  136.73
  -5   6 -17    4.15   38.19
   5   6 -17   27.71   32.00
  -5  -6 -17   54.53   31.86
  -5   6 -18  104.41   63.26
   5   6 -18  253.96   64.46
  -5  -6 -18   95.51   45.78
  -5   6 -19   21.77   33.56
   5   6 -19    4.97   34.68
  -5   6 -20    5.27   33.90
   5   6 -20  177.14   71.65
  -5  -6 -20   13.01   17.82
  -5   6 -21   19.02   45.14
   5   6 -21   44.84   50.31
   5   7   014734.54  601.80
  -5  -7   014751.10  598.16
  -5   7   015399.84  161.43
   5  -7   015373.88  151.61
   5   7   1  239.26  127.38
  -5   7  -1  256.65   63.09
  -5  -7   1  362.81   46.04
   5  -7  -1  229.45   74.52
  -5  -7  -1  299.99   41.79
   5   7  -1  341.10   86.00
  -5   7   1  327.71   59.45
   5  -7   1  225.05   84.21
   5   7   2 3311.69  196.60
   5  -7  -2 3333.34  158.86
  -5   7  -2 3344.03  154.85
  -5  -7   2 3500.27  166.68
  -5  -7  -2 3313.80  154.73
   5   7  -2 3599.82  177.72
   5  -7   2 3216.95  157.07
  -5   7   2 3257.18  145.63
   5   7   3   15.89   15.90
   5  -7  -3   24.44   17.50
  -5   7  -3   20.45   33.18
  -5  -7   3   21.65   21.23
   5   7  -3   39.36   33.85
  -5  -7  -3    6.55   13.29
   5  -7   3    9.67   22.34
  -5   7   3   15.94   17.23
   5   7   4 2737.16  114.14
   5  -7  -4 2888.40  103.62
  -5   7  -4 2793.29  128.91
  -5  -7   4 2634.62  117.67
   5   7  -4 2532.40  143.64
  -5  -7  -4 2779.71  117.78
   5  -7   4 2968.52  122.22
  -5   7   4 2522.03   94.43
   5   7   5   73.60   44.93
  -5   7  -5   29.82   25.06
   5  -7  -5   52.58   15.56
   5   7  -5   51.46   41.87
  -5  -7  -5   18.29   21.63
   5  -7   5   34.32   18.52
  -5   7   5   44.35   10.64
  -5   7  -6   32.88   32.17
  -5  -7  -6    6.31   23.12
  -5   7   6   26.99   10.02
   5   7  -6    8.26   26.47
  -5   7  -7  381.21   98.26
  -5  -7  -7  278.58   74.82
   5   7  -7  360.80   57.33
  -5   7  -8  499.30  136.69
  -5  -7  -8  262.20   78.42
   5   7  -8  649.37   70.27
  -5   7  -9   43.99   22.83
  -5  -7  -9   73.13   42.70
   5   7  -9   99.69   41.01
  -5   7 -10 2346.61  112.06
  -5  -7 -10 1976.51   91.15
   5   7 -10 2177.97  113.07
  -5   7 -11   50.80   27.06
   5   7 -11   68.75   42.13
  -5  -7 -11  -10.44   22.67
  -5   7 -12 4830.26  208.52
   5   7 -12 4849.95  212.72
  -5  -7 -12 5095.42  197.63
  -5   7 -13  121.17   60.10
   5   7 -13  196.06   55.59
  -5  -7 -13  124.03   37.15
  -5   7 -14 1913.02  129.32
   5   7 -14 2012.07  132.62
  -5  -7 -14 1802.58  122.27
  -5   7 -15  225.45   84.78
   5   7 -15  260.54   61.84
  -5  -7 -15  196.78   44.46
  -5   7 -16  364.83  164.02
   5   7 -16  505.94   51.23
  -5  -7 -16  352.31  134.28
   5   7 -17   73.29   52.71
  -5  -7 -17   13.41   16.35
  -5   7 -18  351.47   68.50
   5   7 -18  351.34   74.39
  -5  -7 -18  234.46  118.07
  -5   7 -19   -5.04   35.43
   5   7 -19    4.82   31.84
  -5  -7 -19   21.24   30.90
  -5   7 -20  116.26   53.48
   5   7 -20  120.32   62.55
  -5   7 -21    7.82   44.38
   5   8   0   24.82   10.51
  -5  -8   0   78.12   42.14
  -5   8   0  -19.59   19.47
   5  -8   0    2.49   18.48
   5   8   1  507.17  129.08
  -5   8  -1  609.83  121.55
  -5  -8   1  466.20   51.01
   5  -8  -1  455.08  112.02
   5   8  -1  505.61  154.97
  -5   8   1  516.75   56.11
  -5  -8  -1  460.55   55.40
   5   8   2  469.35   57.99
  -5   8  -2  527.85   57.79
   5  -8  -2  413.97   90.94
  -5   8   2  393.47   69.45
   5   8  -2  464.76   62.95
  -5  -8  -2  397.03   79.90
   5  -8   2  391.20  114.82
   5   8   3  200.13   57.38
   5  -8  -3  152.39   39.72
  -5   8  -3  207.95   70.68
  -5   8   3  142.37   38.98
   5   8  -3  212.94   58.19
   5  -8   3  155.05   67.32
   5   8   4  858.49   75.43
   5  -8  -4  847.69   53.00
  -5   8  -4  873.21   77.26
   5   8  -4  795.70   62.96
   5  -8   4  598.72  165.14
  -5   8   4  890.27   53.91
   5   8   5   77.04   43.52
  -5   8  -5   62.25   39.36
   5  -8  -5   47.18   18.12
  -5   8   5   79.90   29.11
  -5  -8  -5  103.42   32.06
   5   8  -5   59.34   38.40
  -5   8  -6   49.36   41.42
   5  -8  -6    3.22    8.79
  -5   8   6   25.40    8.50
   5   8  -6   26.06   36.30
  -5  -8  -6   29.06   22.91
  -5   8  -7   68.05   35.61
   5   8  -7   40.81   31.44
  -5  -8  -7   45.14   25.82
  -5   8  -8  100.49   53.85
  -5  -8  -8   10.15   15.23
   5   8  -8   92.42   53.79
  -5   8  -9   55.99   39.79
   5   8  -9   88.80   47.97
  -5   8 -10  303.51   56.23
   5   8 -10  460.83  101.25
  -5   8 -11   50.59   42.73
   5   8 -11   84.52   48.90
  -5   8 -12   45.60   42.91
   5   8 -12  137.77   55.01
  -5  -8 -12   30.84   28.14
  -5   8 -13    7.22   39.31
   5   8 -13  154.34   59.69
  -5  -8 -13   -1.07   16.37
  -5   8 -14   82.68   49.04
   5   8 -14  180.20   44.49
  -5  -8 -14   35.41   28.25
  -5   8 -15   91.67   58.01
   5   8 -15  241.68   59.57
  -5  -8 -15  126.89   41.38
  -5   8 -16  442.62   72.10
   5   8 -16  635.16   71.86
  -5   8 -17   64.18   34.71
   5   8 -17   18.15   31.89
  -5  -8 -17   90.46   36.79
  -5   8 -18   21.01   38.04
   5   8 -18  190.81   61.23
  -5   8 -19   65.64   50.59
   5   8 -19   84.53   51.71
  -5   8 -20   58.69   43.26
   5   9   0  258.92   81.94
  -5   9   0  343.48   42.91
   5  -9   0  224.46  111.20
   5   9   1   11.80   26.89
   5  -9  -1   35.95   21.75
  -5   9  -1   29.96   36.11
  -5   9   1   14.02   18.47
   5   9  -1   29.26   22.08
   5  -9   1   12.58   16.28
   5   9   2  157.45   58.86
   5  -9  -2   72.94   22.63
  -5   9  -2  107.08   34.98
   5   9  -2   79.40   47.93
   5  -9   2   91.66   40.72
  -5   9   2   83.09   31.32
   5   9   3  911.09  240.71
   5  -9  -3  890.73  228.26
  -5   9  -3  852.42   61.18
  -5   9   3  823.63   47.09
   5   9  -3  820.39  130.74
   5  -9   3  672.59  182.42
   5   9   4 1010.58   95.86
   5  -9  -4 1263.76   79.38
  -5   9  -4 1283.40   93.49
  -5   9   4 1085.20   73.79
   5   9  -4 1072.79   82.38
   5   9   5   32.32   23.90
   5  -9  -5   21.42   13.02
  -5   9  -5   14.60   12.65
  -5   9   5   29.40   18.14
   5   9  -5   10.27   29.24
   5   9   6 1389.81   94.26
   5  -9  -6 1461.21   56.34
  -5   9  -6 1249.67   78.88
  -5   9   6 1524.19   56.86
   5   9  -6 1361.04  218.30
   5  -9  -7   43.40   16.13
  -5   9  -7   34.05   35.93
  -5   9   7   33.37   12.80
   5   9  -7   -4.66   28.61
  -5   9  -8 2181.65  142.15
   5   9  -8 2037.17  139.65
  -5   9  -9  102.78   37.39
   5   9  -9  118.05   50.76
  -5   9 -10  516.34   89.79
   5   9 -10  399.55   66.97
  -5   9 -11  101.97   61.16
   5   9 -11   -4.11   31.83
  -5   9 -12   55.72   47.12
   5   9 -12  128.72   65.45
  -5   9 -13   45.56   36.99
   5   9 -13   81.32   60.43
  -5  -9 -13   43.86   23.67
  -5   9 -14   81.27   38.45
   5   9 -14  110.29   54.91
  -5  -9 -14   38.22   21.97
  -5   9 -15   -6.69   36.70
   5   9 -15   12.79   31.37
  -5  -9 -15   17.31    9.05
  -5   9 -16  225.40   58.92
   5   9 -16  197.77   58.07
  -5  -9 -16  107.39   60.53
  -5   9 -17   20.91   42.81
   5   9 -17   37.36   36.48
  -5   9 -18  223.44   96.33
   5   9 -18  310.01   70.22
  -5  -9 -18  108.71   76.00
  -5   9 -19   22.57   37.82
   5   9 -19   55.01   56.23
   5  10   0   30.76   25.12
  -5  10   0   10.26   14.53
   5 -10   0   14.72   14.51
  -5  10  -1   28.46   24.04
   5  10   1   73.24   44.91
   5 -10  -1   35.17   25.92
  -5  10   1    5.34   38.32
   5  10  -1   34.49   31.95
   5 -10   1    1.29   19.54
   5  10   2 2693.07  114.52
  -5  10  -2 2367.23  110.08
   5  10  -2 2503.40  121.70
  -5  10   2 2156.54  133.99
   5  10   3   35.65   26.39
  -5  10  -3   59.97   33.20
   5  10  -3   47.16   41.06
  -5  10   3  124.16   31.28
   5  10   4  319.69   91.33
   5 -10  -4  318.49   64.60
  -5  10  -4  432.67  105.75
  -5  10   4  435.00   50.80
   5  10  -4  421.50  132.52
   5  10   5   22.30   18.22
   5 -10  -5   34.51   17.85
  -5  10  -5   -3.86   28.01
  -5  10   5   15.41   17.12
   5  10  -5    7.87   14.36
   5  10   6  -18.54   24.59
  -5  10  -6   21.32   35.35
   5  10  -6   -3.32   31.06
  -5  10   6   91.26   27.69
   5 -10  -7   16.45   10.76
  -5  10  -7   33.45   33.61
  -5  10   7   13.76   13.05
   5  10  -7   83.79   51.84
  -5  10  -8  338.48   62.67
   5  10  -8  254.73   70.92
  -5  10  -9  113.13   55.66
   5  10  -9  177.85   68.50
  -5  10 -10  828.56   98.03
   5  10 -10  785.48   80.38
  -5  10 -11   76.24   57.33
   5  10 -11  113.49   64.04
  -5  10 -12  984.00  106.95
   5  10 -12  718.42   84.09
  -5  10 -13   34.85   46.30
   5  10 -13  -35.12   31.23
  -5  10 -14   45.21   39.10
   5  10 -14   70.55   51.81
  -5  10 -15   85.61   63.50
   5  10 -15   84.96   64.35
  -5 -10 -15   -4.56   18.13
  -5  10 -16  189.61   72.17
   5  10 -16  259.21   55.99
  -5 -10 -16  186.75   79.63
  -5  10 -17  128.04   65.87
   5  10 -17   78.89   54.15
  -5  10 -18   55.68   57.43
   5  10 -18  132.28   68.70
   5  10 -19   28.14   37.32
   5  11   0  294.82   98.20
  -5  11   0  187.42   81.86
   5 -11   0  170.39   69.94
  -5  11  -1  393.68   51.34
   5  11   1  333.28  100.22
   5 -11  -1  253.32  101.76
  -5  11   1  452.28  127.40
   5  11  -1  547.51  104.62
   5  11   2  394.99  111.81
   5 -11  -2  230.19   77.95
  -5  11  -2  334.82   45.74
  -5  11   2  425.73  115.95
   5  11  -2  425.29  147.05
   5  11   3  134.24   48.48
   5 -11  -3   54.66   24.43
  -5  11  -3  129.58   43.51
  -5  11   3  126.80   31.34
   5  11  -3   73.73   49.73
   5  11   4  417.54  152.01
   5 -11  -4  375.44   62.36
  -5  11  -4  416.62  124.78
  -5  11   4  466.50   38.54
   5  11  -4  415.16  114.57
   5  11   5  176.88   42.62
   5 -11  -5  112.99   61.02
  -5  11  -5  154.41   31.55
  -5  11   5  219.67   65.48
   5  11  -5  280.90  101.99
   5  11   6  877.15  110.62
   5 -11  -6  999.22   67.77
  -5  11  -6 1107.45   89.28
  -5  11   6 1135.14   56.66
   5  11  -6  980.96   75.17
   5  11   7    3.22   13.72
  -5  11  -7   -1.41   30.91
   5 -11  -7    0.49    5.04
   5  11  -7   25.71   38.45
  -5  11  -8 1171.58  120.67
   5 -11  -8  998.18   61.24
   5  11  -8 1018.59  198.28
  -5  11  -9   -1.13   35.94
   5  11  -9   72.02   36.96
  -5  11 -10  115.46   52.03
   5  11 -10    8.01   30.36
  -5  11 -11   26.29   38.20
   5  11 -11  129.96   61.64
  -5  11 -12    8.31   42.11
   5  11 -12  173.26   64.83
  -5  11 -13   48.12   45.01
   5  11 -13   36.83   38.12
  -5  11 -14  223.18   72.88
   5  11 -14  289.09   72.55
  -5 -11 -14  151.47   63.66
  -5  11 -15  108.89   71.72
   5  11 -15    4.02   35.62
  -5  11 -16  205.12   81.50
   5  11 -16  216.59   88.02
  -5  11 -17   12.80   21.87
   5  11 -17   38.47   36.70
  -5  11 -18   67.96   60.32
   5  11 -18  130.10   47.90
   5  12   0   17.34   21.14
  -5  12   0   53.68   38.47
  -5  12  -1  452.26  115.17
   5  12   1  364.51   92.62
  -5  12   1  422.17  112.22
   5  12  -1  530.07  127.71
   5  12   2  224.45   88.83
   5 -12  -2  147.04   60.39
  -5  12  -2  261.40  124.90
  -5  12   2  280.81   44.84
   5  12  -2  310.38   71.94
   5  12   3  123.27   48.39
   5 -12  -3  132.83   47.97
  -5  12  -3  175.23   50.16
  -5  12   3  139.94   39.56
   5  12  -3  182.48   41.98
   5  12   4  476.00  121.91
   5 -12  -4  181.17   71.83
  -5  12  -4  413.76   60.25
  -5  12   4  387.76   42.15
   5  12  -4  268.68   65.21
   5  12   5   34.10   27.59
   5 -12  -5   14.48   15.35
  -5  12  -5   51.95   39.83
  -5  12   5   11.51   16.25
   5  12  -5   34.85   31.22
   5  12   6   22.75   26.30
   5 -12  -6   17.12   18.18
  -5  12  -6  158.61   62.36
   5  12  -6   87.22   49.02
  -5  12   6   16.29   12.42
   5  12   7    7.06   15.73
  -5  12  -7   41.25   41.18
   5  12  -7   40.39   19.35
  -5  12   7    7.05    9.70
  -5  12  -8  308.56   58.37
   5  12  -8  306.12   75.93
  -5  12  -9  320.42   54.33
   5  12  -9  243.94  106.08
  -5  12 -10  377.10  210.91
   5  12 -10  645.08   90.12
  -5  12 -11  120.36   46.90
   5  12 -11   60.42   49.28
  -5  12 -12  274.20   83.57
   5  12 -12  162.98   80.79
  -5  12 -13   29.48   43.64
   5  12 -13   -9.44   41.56
  -5  12 -14  220.82  115.80
   5  12 -14  211.10   72.58
  -5 -12 -14  171.42  106.95
  -5  12 -15   42.10   64.65
   5  12 -15   24.78   33.34
  -5 -12 -15   15.90   14.67
  -5  12 -16  423.68   95.06
   5  12 -16  176.34   52.67
  -5  12 -17  120.48   68.56
   5  12 -17   96.06   67.67
   5  13   0 3782.97  236.67
  -5  13   0 3774.63  231.19
   5  13   1  379.54  121.14
  -5  13  -1  190.56  118.78
   5  13  -1  364.65   95.80
  -5  13   1  207.09   89.21
   5  13   2 1967.43  142.40
  -5  13  -2 2136.98  131.96
   5  13  -2 2115.28  140.47
  -5  13   2 2122.23  129.15
   5  13   3   31.48   39.60
  -5  13  -3  145.61   64.44
   5  13  -3   55.71   28.23
  -5  13   3    7.62   17.00
   5  13   4  408.80  114.40
  -5  13  -4  377.64  104.36
   5  13  -4  465.77  170.59
  -5  13   4  377.02   41.66
   5  13   5   14.03   42.31
  -5  13  -5   15.29   41.95
   5  13  -5   67.78   39.32
  -5  13   5   11.39   24.18
   5  13   6   41.68   33.05
  -5  13  -6  117.59   45.61
  -5  13   6   36.17   16.10
   5  13  -6   27.39   34.84
   5  13   7   47.60   28.22
  -5  13  -7   69.76   49.83
  -5  13   7   28.15   16.37
   5  13  -7  151.72   48.00
   5  13  -8  101.58   64.49
  -5  13  -9   92.00   45.21
   5  13  -9   40.47   25.13
  -5  13 -10  353.66   65.86
   5  13 -10  237.17   95.91
  -5  13 -11  133.11   70.47
   5  13 -11  144.55   57.97
  -5  13 -12 1599.54  177.67
   5  13 -12 1486.73  170.73
  -5  13 -13   46.52   48.02
   5  13 -13   42.09   43.20
  -5  13 -14  404.30   74.26
   5  13 -14  673.06   86.05
  -5  13 -15   50.03   55.25
   5  13 -15   -2.87   34.20
   5  14   0   -3.42   25.10
  -5  14   0   -7.57   22.59
  -5  14  -1   42.75   41.13
   5  14   1   75.19   36.73
  -5  14   1   39.41   27.35
   5  14  -1  103.97   54.92
   5  14   2  133.64   55.63
  -5  14  -2  136.36   55.36
   5  14  -2   87.04   35.56
  -5  14   2   56.74   35.24
   5  14   3   44.49   19.49
  -5  14  -3   -2.10   26.53
   5  14  -3   28.14   20.00
  -5  14   3   76.71   35.86
   5  14   4   44.66   41.08
  -5  14  -4   46.41   37.09
   5  14  -4    6.90   44.13
   5  14   5   77.70   41.77
  -5  14  -5  103.44   51.56
  -5  14   5    1.53   18.08
   5  14  -5   60.67   34.84
   5  14   6   35.87   19.75
  -5  14  -6   16.07   40.46
  -5  14   6   32.53   22.48
   5  14  -6   89.79   52.01
   5  14   7   74.79   25.89
  -5  14  -7   95.00   54.72
   5  14  -7  134.26   63.62
  -5  14  -8    8.54   36.02
   5  14  -8   38.09   39.49
  -5  14  -9  125.94   62.58
   5  14  -9  112.60   56.89
  -5  14 -10  102.63   40.18
   5  14 -10  178.75   56.20
  -5  14 -11   18.75   24.23
   5  14 -11   62.47   46.58
  -5  14 -12  104.61   49.26
   5  14 -12   46.21   29.26
  -5  14 -13    6.72   41.32
   5  14 -13   15.78   41.32
   5  14 -14  115.51   71.89
   5  15   0  659.06  187.43
  -5  15   0  667.45   69.79
  -5  15  -1   10.71   27.84
   5  15   1   65.22   34.89
  -5  15   1   31.51   33.70
   5  15  -1  123.37   49.64
   5  15   2 1880.98  128.85
  -5  15  -2 1580.46  118.62
   5  15  -2 1664.58  313.42
  -5  15   2 1735.75  124.98
   5  15   3   92.92   46.24
  -5  15  -3  128.38   50.85
   5  15  -3  121.16   38.23
  -5  15   3   74.66   38.74
   5  15   4 2429.82  168.47
  -5  15  -4 2232.67  143.84
   5  15  -4 2180.64  140.19
  -5  15   4 2390.86  133.97
   5  15   5   50.06   52.02
  -5  15  -5   19.19   38.66
  -5  15   5   34.60   24.34
   5  15  -5  136.31   43.42
   5  15   6 1034.41  142.48
  -5  15  -6  969.26   99.76
   5  15  -6  954.09  177.13
   5  15   7  151.16   66.95
  -5  15  -7   63.36   44.50
   5  15  -7  141.73   44.83
  -5  15  -8  651.59  222.32
   5  15  -8  689.50  159.61
   5  15  -9   -3.69   23.83
   5  15 -10  383.04   91.59
  -5  15 -11  -14.22   42.95
   5  15 -11   34.09   51.94
  -5  15 -12  178.48  129.49
   5  15 -12  330.48  120.85
   5  16   0   36.48   43.59
  -5  16   0  151.02   62.06
   5  16   1   41.95   37.71
  -5  16  -1   48.16   31.96
   5  16  -1   95.84   54.97
  -5  16   1   49.34   39.17
   5  16   2  104.85   46.41
   5  16  -2    9.59   33.49
  -5  16   2   76.53   48.66
   5  16   3   76.78   47.59
  -5  16  -3   18.70   33.24
   5  16  -3   41.02   36.23
   5  16   4   19.09   29.21
  -5  16  -4   33.64   49.59
  -5  16   4   70.20   36.00
   5  16  -4   28.57   34.44
   5  16   5   44.94   38.60
  -5  16  -5   59.26   46.67
   5  16  -5   -4.20   36.52
   5  16   6   31.03   21.01
  -5  16  -6  106.06   59.03
   5  16   7   22.92   38.93
  -5  16  -7   48.52   53.33
   5  16  -7   -4.32   27.14
  -5  16  -8  103.18   56.74
   5  16  -8  102.24   49.61
  -5  16  -9  -12.19   35.03
   5  16  -9  111.71   46.57
  -5  16 -10  272.33   89.01
   5  16 -10  108.71   43.16
   5  17   0 1537.85  154.22
  -5  17   0 1596.90  115.42
  -5  17  -1   27.10   34.43
   5  17  -1   88.28   53.68
   5  17   2 1028.97  177.76
  -5  17  -2  987.46  105.93
   5  17  -2 1033.66  243.54
  -5  17   2 1015.21   90.35
   5  17   3   57.86   40.06
  -5  17  -3   42.88   42.07
   5  17  -3   18.87   20.09
   5  17   4  298.41  170.35
  -5  17  -4  242.69  184.28
   5  17  -4  333.08  121.73
   5  17   5   54.30   24.08
  -5  17  -5   23.97   39.92
   5  17  -5   42.50   58.43
   5  17   6   48.60   30.94
  -5  17  -6   82.56   47.63
   5  17  -6  141.16   50.06
   5  17   7   17.45   17.96
  -5  17  -7  104.83   56.89
   5  17  -7   22.75   33.54
   5  18   0   58.74   35.49
  -5  18   0   16.52   35.68
   5  18   1   68.53   33.64
  -5  18  -1   65.81   54.22
   5  18   2   56.18   35.97
  -5  18  -2  153.99   61.00
   5  18  -2  169.36   43.25
  -6   0   022356.46  542.35
  -6   0   1   24.44   14.38
  -6   0   2 1838.89   96.17
  -6   0   3    4.90   19.27
  -6   0  -3   44.40   28.48
   6   0  -4 1135.59   68.00
  -6   0   4 1278.38   73.11
  -6   0  -4 1097.96   55.61
   6   0  -5   10.55   12.80
  -6   0   5   17.68   16.99
  -6   0  -5   19.60   16.31
   6   0  -6  199.53   49.37
  -6   0   6  201.88   26.16
  -6   0  -6  219.72   61.80
   6   0  -7   13.52    8.29
  -6   0   7   -1.80    8.65
  -6   0  -7   14.26   24.83
   6   0  -8  208.07   53.91
  -6   0   8  211.00   22.63
  -6   0  -8  265.28   34.80
   6   0  -9   20.44   19.98
  -6   0   9   -0.33   12.10
  -6   0  -9   40.18   23.81
   6   0 -10  169.23   50.39
  -6   0  10   97.77   37.08
  -6   0 -10  179.82   52.83
   6   0 -11   55.95   17.20
  -6   0  11   22.37   17.12
  -6   0 -11   62.40   20.17
   6   0 -12 3447.83  129.04
  -6   0  12 3767.23  121.22
  -6   0 -12 3415.75  175.54
   6   0 -13   44.35   21.78
  -6   0  13   35.53   19.47
  -6   0 -13   11.71   31.75
   6   0 -14   72.36   31.20
  -6   0  14   34.35   20.63
  -6   0 -14  131.26   49.32
   6   0 -15   21.60   18.62
  -6   0 -15   33.48   18.76
  -6   0  15    2.40    8.72
   6   0 -16  607.90   88.54
  -6   0 -16  695.48  106.66
  -6   0  16  455.31  118.52
   6   0 -17    4.13   13.65
  -6   0 -17   16.81   27.00
  -6   0 -18  203.96   68.20
   6   0 -19   57.48   25.98
  -6   0 -19   43.89   46.95
  -6   0 -20    4.23   32.70
  -6   0 -21   38.90   51.89
  -6   0 -22   86.46   30.11
  -6  -1   0   23.30   22.15
  -6   1  -1 1910.23   81.81
  -6  -1   1 1900.99  114.11
  -6   1   1 1855.38   71.75
  -6  -1  -1 1747.07   84.85
  -6  -1   2   10.72   15.71
  -6   1  -2   19.00   16.08
  -6  -1  -2   29.81   20.06
  -6   1   2    2.36   12.53
   6   1  -2   18.23   15.57
  -6   1  -3 7589.22  209.07
  -6  -1   3 7535.13  203.21
  -6   1   3 7775.53  202.30
   6   1  -3 7432.59  203.15
  -6   1  -4  281.20   94.23
  -6  -1   4  213.40   62.81
  -6   1   4  256.17   30.01
   6   1  -4  294.27   33.80
  -6   1  -5 7410.62  159.27
  -6  -1   5 7612.62  153.79
  -6   1   5 7580.71  150.92
   6   1  -5 7614.31  154.63
  -6  -1  -5 7436.12  187.68
   6  -1  -6  341.15   74.71
  -6   1  -6  363.85   91.15
  -6  -1   6  331.34   32.58
   6   1  -6  363.91   36.55
  -6  -1  -6  272.00   67.74
  -6   1   6  266.68   22.60
   6  -1  -712012.63  482.16
  -6   1  -712433.93  513.66
  -6  -1   711746.13  475.30
  -6   1   711856.50  474.17
   6   1  -712243.42  497.98
  -6  -1  -712133.76  498.60
   6  -1  -8   72.29   16.43
  -6   1  -8  131.36   42.80
  -6  -1   8   94.43   27.58
  -6   1   8   95.08   21.23
   6   1  -8   49.63   22.54
  -6  -1  -8   78.15   26.00
  -6   1  -9 5946.16  219.36
  -6  -1   9 5861.88  248.98
  -6   1   9 5927.93  205.69
   6   1  -9 6087.87  238.45
  -6  -1  -9 6474.16  249.78
   6  -1 -10 1353.96   83.90
  -6   1 -10 1523.96   98.32
  -6  -1  10 1671.74   93.94
   6   1 -10 1304.41  127.43
  -6  -1 -10 1273.37   92.75
  -6   1  10 1521.59   81.21
   6  -1 -11 5049.66  280.55
  -6   1 -11 4716.56  297.26
  -6   1  11 4566.99  260.02
  -6  -1 -11 4560.71  296.74
   6   1 -11 4673.61  265.80
   6  -1 -12   22.39   10.59
  -6   1 -12   39.36   28.76
  -6   1  12   30.12   10.43
  -6  -1 -12   53.14   36.04
   6   1 -12   40.76   27.33
   6  -1 -13  289.76   47.03
  -6   1 -13  178.22   34.58
  -6  -1  13  123.07   38.90
  -6   1  13  219.59   24.63
   6   1 -13  179.66   38.67
  -6  -1 -13  195.18   37.76
   6  -1 -14  636.95   41.26
  -6  -1  14  566.51   40.75
  -6   1 -14  581.95  104.46
   6   1 -14  603.63   98.30
  -6   1  14  350.32   81.39
  -6  -1 -14  475.66  188.96
   6  -1 -15 1317.33   86.63
  -6  -1  15 1202.20   85.09
  -6   1 -15 1161.36  127.22
   6   1 -15 1231.94  141.82
  -6  -1 -15 1052.04  112.38
  -6   1  15 1301.59   84.88
   6  -1 -16  329.48   74.31
  -6  -1  16  156.40   85.00
  -6   1 -16  291.37   95.36
  -6  -1 -16  297.27   64.60
   6   1 -16  421.16   96.59
   6  -1 -17  262.95   90.82
  -6   1 -17  197.87   60.66
   6   1 -17  301.06   84.53
  -6  -1 -17  229.12   81.08
   6  -1 -18   24.00   16.52
  -6   1 -18   52.61   31.38
   6   1 -18   35.03   18.58
  -6  -1 -18   27.71   38.51
  -6   1 -19  299.83  133.38
   6   1 -19  389.17   95.10
  -6  -1 -19  242.34   95.38
  -6   1 -20   88.47   37.70
  -6  -1 -20   66.78   44.09
  -6   1 -21  251.51   71.17
  -6  -1 -21  179.32   58.73
  -6   1 -22  152.57   74.88
  -6  -1 -22  108.63   61.07
  -6  -2   010362.72  283.95
  -6   2   0 9787.39  253.14
  -6   2  -1  648.94   71.74
  -6  -2   1  704.14   70.28
   6   2  -1  665.57   81.17
  -6   2   1  661.93   58.50
  -6  -2  -1  660.50   60.16
  -6   2  -2 1021.48   53.04
  -6  -2   2 1005.54   57.86
   6   2  -2  889.41   63.73
  -6  -2  -2  939.47   79.62
  -6   2   2 1083.03   49.40
  -6  -2   3 2282.60  110.89
  -6   2  -3 2121.98   81.63
   6   2  -3 2005.03   82.19
  -6  -2   4 2761.93   95.76
  -6   2  -4 2673.65  105.18
  -6   2   4 2628.42   80.27
  -6  -2  -4 2613.99   91.68
   6   2  -4 2578.17  105.76
  -6   2  -5  407.89   78.51
  -6  -2   5  404.30   40.03
  -6   2   5  330.74   30.28
   6   2  -5  355.77   87.46
   6  -2   5  332.40   54.07
  -6   2  -6 5338.93  134.37
  -6  -2   6 5152.36  124.68
  -6   2   6 5245.88  106.50
   6   2  -6 5234.08  133.95
  -6  -2  -6 4692.92  137.01
  -6   2  -7  516.83  140.42
  -6  -2   7  234.13   89.34
  -6   2   7  258.13   19.15
   6   2  -7  268.69   69.20
  -6  -2  -7  384.70   93.97
   6  -2   7  265.48   72.46
  -6   2  -8 4746.09  215.02
  -6  -2   8 5158.10  186.27
  -6   2   8 4957.40  163.41
   6   2  -8 4643.22  190.40
  -6  -2  -8 5034.91  191.61
   6  -2   8 5012.62  186.01
   6  -2  -9   21.79    8.17
  -6   2  -9   53.97   38.39
  -6  -2   9   10.90   11.90
  -6   2   9   13.04   11.54
   6   2  -9   63.79   17.21
  -6  -2  -9   28.87   27.28
   6  -2   9   33.61   17.34
   6  -2 -10  498.52   59.36
  -6   2 -10  562.27  125.16
  -6  -2  10  617.38   39.41
  -6   2  10  533.13   22.70
   6   2 -10  528.47   87.51
  -6  -2 -10  573.24   70.43
   6  -2 -11   12.95   13.08
  -6   2 -11  -24.69   32.08
  -6  -2  11   37.36   18.48
  -6   2  11   30.17   12.58
   6   2 -11   27.62   23.83
  -6  -2 -11   -2.45   26.02
  -6   2 -12   98.37   35.27
   6   2 -12   91.29   38.63
  -6   2  12  107.80   28.62
  -6  -2 -12   95.09   27.40
  -6   2 -13 1076.41  168.10
  -6  -2  13 1109.95   78.04
  -6   2  13 1122.52   65.40
   6   2 -13 1152.84   79.39
  -6  -2 -13 1095.60   89.34
  -6  -2  14  169.72   48.02
  -6   2 -14  215.41   61.14
   6   2 -14  263.25   60.25
  -6   2  14  341.16   38.25
  -6  -2 -14  209.61   46.92
   6  -2 -15   33.90   15.60
  -6   2 -15   57.16   37.32
   6   2 -15   -0.49   19.55
  -6   2  15   22.59   11.97
  -6  -2 -15   10.89   35.45
   6  -2 -16   48.84   16.54
  -6   2 -16   88.92   44.17
   6   2 -16   15.61   24.41
  -6  -2 -16   64.21   44.49
  -6   2 -17   29.36   21.49
   6   2 -17   57.68   34.20
  -6  -2 -17   48.31   29.00
  -6   2 -18  492.90   56.39
  -6  -2 -18  547.34  104.68
  -6   2 -19    0.19   18.69
  -6  -2 -19   67.77   39.71
  -6   2 -20  178.32   74.42
  -6  -2 -20  185.28   68.89
  -6   2 -21   86.45   39.69
  -6  -2 -21   19.48   33.68
  -6  -2 -22   14.89   21.36
   6   3   0   24.67   22.51
  -6  -3   0    3.16   19.08
  -6   3   0   17.50   31.82
   6   3   1  915.26  103.47
  -6   3  -1  882.90   45.12
  -6  -3   1  884.54   55.20
  -6  -3  -1  868.11   85.66
   6   3  -1  878.62   55.58
  -6   3   1  847.80   46.39
  -6   3  -2 3770.73  125.89
  -6  -3   2 3455.79  142.80
  -6  -3  -2 3228.94  110.31
   6   3  -2 3674.72  123.14
  -6   3   2 3519.24  106.55
   6  -3   2 3441.56  113.39
  -6   3  -3 4345.80  120.62
  -6  -3   3 4586.25  126.29
   6   3  -3 4622.21  130.00
  -6  -3  -3 4589.25  121.74
  -6   3   3 4673.39  103.62
   6  -3   3 4666.11  110.73
  -6  -3   4 5100.09  123.95
  -6   3  -4 4858.24  135.24
   6   3  -4 4922.38  155.93
  -6  -3  -4 4929.01  140.21
  -6   3   4 5121.19  108.94
   6  -3   4 5451.23  133.47
  -6   3   4 5232.39  105.60
  -6  -3   5 7142.50  155.29
  -6   3  -5 6764.21  164.13
   6   3  -5 6589.36  175.16
  -6  -3  -5 6555.58  152.47
  -6   3   5 7133.90  130.21
  -6   3   5 6915.68  125.72
  -6  -3   6  123.68   32.08
  -6   3  -6  116.92   32.35
  -6   3   6   64.83   15.39
  -6  -3  -6   53.75   33.91
   6   3  -6   33.97   29.34
  -6   3   6   69.46   15.87
   6  -3   6  112.77   27.51
  -6  -3   7 2891.92  139.88
  -6   3  -7 2822.36  139.49
  -6   3   7 2993.80  126.12
  -6  -3  -7 3088.61  158.88
   6   3  -7 2869.39  154.21
   6  -3   7 3014.31  149.94
  -6   3   7 2786.75  118.82
  -6   3  -8  590.25   80.53
   6   3  -8  702.31  160.03
  -6   3   8  565.73   32.83
   6  -3   8  630.12   49.00
  -6  -3  -8  822.08   92.93
  -6   3  -9 2419.92  139.23
  -6  -3   9 2494.82  135.92
  -6   3   9 2674.78  122.31
   6   3  -9 2664.36  143.68
  -6  -3  -9 2621.44  155.89
  -6   3 -10 1161.88  229.86
  -6  -3  10  945.32   63.82
  -6   3  10 1082.05   53.80
   6   3 -10 1070.02   82.15
  -6  -3 -10 1091.87   82.17
  -6   3 -11 2162.47  243.08
  -6  -3  11 2219.13  139.24
  -6   3  11 2251.73  124.40
   6   3 -11 2009.91  138.86
  -6  -3 -11 2011.63  146.48
  -6  -3  12 1359.94   74.68
  -6   3 -12 1205.87   89.56
   6   3 -12 1200.77  105.76
  -6   3  12 1352.97   42.22
  -6  -3 -12 1339.04   75.90
  -6  -3  13  181.49   74.74
  -6   3 -13  270.14   65.41
   6   3 -13  345.07   70.21
  -6  -3 -13  260.41   74.69
  -6   3 -14  427.59   57.94
   6   3 -14  399.84   62.35
  -6  -3 -14  426.05   57.74
  -6   3  14  351.52   15.49
  -6   3 -15  120.11   42.74
   6   3 -15   45.14   32.11
  -6  -3 -15   27.36   32.70
  -6   3 -16 1145.80   99.50
   6   3 -16 1194.57   99.96
  -6  -3 -16 1194.30  113.29
  -6   3 -17  108.45   43.77
   6   3 -17  266.34   57.42
  -6  -3 -17  119.86   43.12
  -6   3 -18  180.02   48.27
  -6  -3 -18  192.47   67.90
  -6   3 -19  140.68   68.01
   6   3 -19  175.57   45.22
  -6  -3 -19  166.68   67.27
  -6   3 -20   50.50   31.28
  -6  -3 -20   33.90   39.09
  -6   3 -21   78.14   53.22
  -6  -3 -21  136.10   62.94
  -6   3 -22   72.56   70.75
  -6  -3 -22   69.02   52.65
   6   4   0 7645.14  163.69
  -6  -4   0 7417.34  173.58
   6  -4   0 7482.12  162.31
  -6  -4   1  156.16   60.49
   6   4   1  215.38   77.09
  -6   4  -1  180.55   44.50
   6   4  -1  148.79   29.67
  -6   4   1  207.67   60.71
  -6  -4  -1  143.96   44.38
   6  -4   1  248.89   40.76
   6   4   2  124.78   30.16
  -6   4  -2   84.15   36.66
  -6  -4   2  105.09   32.97
   6   4  -2   86.10   22.54
  -6   4   2   79.67   31.26
  -6  -4  -2   84.99   23.96
   6  -4   2   60.34   16.83
  -6   4  -3 2559.30   92.89
  -6  -4   3 2763.52   93.01
  -6  -4  -3 2509.32  100.09
  -6   4   3 2560.94   88.83
   6   4  -3 2748.07   87.32
   6  -4   3 2855.36   84.09
  -6   4  -4  403.88  112.61
  -6  -4   4  399.47   40.49
  -6  -4  -4  399.95   84.53
  -6   4   4  339.56   23.84
   6   4  -4  312.13   92.12
   6  -4   4  347.29  104.51
  -6   4  -5   25.91   27.01
  -6   4   5    0.40    9.37
   6   4  -5    7.68   24.58
  -6  -4  -5   15.56   19.30
  -6   4   5   16.63   10.81
   6  -4   5   27.86   22.88
  -6  -4   6  695.48   53.65
  -6   4  -6  766.31  126.35
   6   4  -6  716.47   71.84
  -6  -4  -6  593.91  107.08
  -6   4   6  791.58   41.12
  -6   4   6  691.92   37.70
   6  -4   6  640.27  104.89
  -6  -4   7  103.22   38.84
  -6   4  -7   38.19   26.05
  -6   4   7   17.01    8.80
  -6  -4  -7   11.44   19.50
   6   4  -7   22.73   28.38
  -6   4   7   11.76   11.48
   6  -4   7   11.20   16.51
  -6  -4   8  499.18   52.35
  -6   4  -8  496.21  122.69
  -6   4   8  411.99   67.65
  -6  -4  -8  324.47  100.60
   6   4  -8  365.46   67.18
  -6   4  -9 1099.84  168.43
  -6  -4   9  998.01  133.09
   6   4  -9  900.74  174.65
  -6  -4  -9  633.28  175.30
  -6  -4  -9  941.99   80.51
  -6  -4  10   16.41   19.06
  -6   4 -10   20.95   32.37
   6   4 -10   52.16   25.74
  -6  -4 -10   32.58   30.05
  -6  -4  11  347.71   52.43
  -6   4 -11  309.91  117.03
   6   4 -11  310.31   75.65
  -6  -4 -11  395.26  128.43
  -6   4 -12 2750.60  176.61
   6   4 -12 2474.70  167.06
  -6  -4 -12 2481.87  151.47
  -6   4 -13  594.79   99.65
   6   4 -13  618.11   62.11
  -6  -4 -13  622.85  111.53
  -6   4 -14  104.57   43.28
   6   4 -14   26.34   33.01
  -6  -4 -14   22.53   18.94
  -6   4 -15   33.69   31.46
   6   4 -15   56.07   31.67
  -6  -4 -15    7.52   27.93
  -6   4 -16   40.81   44.20
   6   4 -16  128.28   50.14
  -6  -4 -16   68.83   50.33
  -6   4 -17   20.89   27.40
   6   4 -17   13.11   24.01
  -6  -4 -17   44.15   32.91
  -6   4 -18   28.83   34.76
  -6  -4 -18   13.44   16.33
  -6   4 -19   36.84   28.18
  -6  -4 -19   18.20   38.65
  -6   4 -20   36.59   23.28
  -6  -4 -20   69.92   42.93
  -6   4 -21   20.76   54.11
   6   4 -21   10.89   25.48
  -6  -4 -21   36.22   34.75
   6   5   0    4.17   16.58
  -6  -5   0   25.17   27.30
  -6   5   0   53.21   23.09
   6  -5   0   23.07   16.43
   6   5   1   -6.00   20.51
   6  -5  -1   46.69   22.87
  -6  -5   1   -3.92   11.26
  -6   5  -1   20.40   29.34
  -6  -5  -1   34.99   24.26
   6   5  -1  -19.86   24.03
   6  -5   1   22.33   19.59
  -6   5   1   25.80   17.34
   6   5   2  799.33   46.52
   6  -5  -2  879.66   36.92
  -6   5  -2  765.55   47.22
  -6  -5   2  754.53   54.56
   6   5  -2  754.49   68.71
  -6  -5  -2  656.59  144.33
   6  -5   2  837.73   43.76
  -6   5   2  791.32   39.25
   6   5   3 1226.01   78.78
  -6   5  -3 1011.63   66.57
  -6  -5   3 1175.96   75.66
  -6  -5  -3 1081.99   77.91
  -6   5   3 1092.55   62.76
   6   5  -3 1139.36  122.05
   6  -5   3 1042.35   77.50
  -6   5  -4 3495.23  164.26
  -6  -5   4 3413.27  165.53
  -6  -5  -4 3659.54  172.45
  -6   5   4 3521.20  160.99
   6   5  -4 3716.28  177.72
   6  -5   4 3668.28  167.37
  -6   5  -5   62.54   19.11
  -6  -5   5   82.94   22.29
   6   5  -5   27.65   39.54
  -6  -5  -5   31.54   18.34
  -6   5   5   91.66   16.55
   6  -5   5   89.07   24.21
  -6   5  -6  314.64   68.51
  -6  -5   6  220.16   63.14
   6   5  -6  283.78   60.92
  -6  -5  -6  176.88   42.10
  -6   5  -7   45.54   34.46
  -6  -5   7  106.29   40.29
   6   5  -7    2.31   24.04
  -6  -5  -7   27.84   25.75
  -6   5  -8  709.42   65.71
  -6  -5   8  777.34   60.75
   6   5  -8  478.36  126.26
  -6  -5  -8  476.93  155.42
  -6   5  -9   41.41   29.60
  -6  -5  -9   14.05   11.06
   6   5  -9   63.49   33.33
  -6   5 -10 1419.40  165.15
   6   5 -10 1604.66  172.06
  -6  -5 -10 1487.57  143.16
  -6   5 -11   31.14   38.71
   6   5 -11   39.69   35.32
  -6  -5 -11    6.83   13.18
  -6   5 -12  327.51   72.73
   6   5 -12  346.06   77.71
  -6  -5 -12  189.95   73.55
  -6   5 -13  321.14   59.24
   6   5 -13  247.93   70.76
  -6  -5 -13  280.06   70.16
  -6   5 -14   55.58   44.64
   6   5 -14  279.95   59.65
  -6  -5 -14   76.55   42.16
  -6   5 -15   59.22   37.05
   6   5 -15   53.09   34.03
  -6  -5 -15   29.34   16.65
  -6   5 -16  964.19  110.90
   6   5 -16 1268.83  120.29
  -6  -5 -16  919.89   84.08
  -6   5 -17   69.74   28.18
   6   5 -17   38.25   41.24
  -6  -5 -17   40.29   33.62
  -6   5 -18  203.45   85.83
  -6  -5 -18  142.60   53.08
  -6   5 -19   12.39   40.04
   6   5 -19   20.51   33.75
  -6  -5 -19   -2.76   34.45
  -6   5 -20   30.33   29.06
   6   5 -20   95.45   58.48
  -6  -5 -20   33.12   35.71
  -6   5 -21   -4.49   46.98
   6   5 -21   24.00   29.18
  -6  -5 -21   53.69   23.26
   6   6   0 1563.16   89.90
  -6  -6   0 1486.53   89.75
  -6   6   0 1581.83   89.41
   6  -6   0 1529.79   78.43
   6   6   1   63.81   19.90
  -6   6  -1   35.72   14.04
  -6  -6   1   95.95   34.83
   6  -6  -1   58.45   17.67
  -6  -6  -1  109.07   25.83
   6   6  -1   90.46   52.23
  -6   6   1   85.71   31.64
   6  -6   1   45.77   36.91
   6   6   2  246.98   47.24
  -6   6  -2  249.31   84.27
  -6  -6   2  233.78   41.48
   6  -6  -2  264.95   76.46
  -6  -6  -2  156.01   43.78
   6   6  -2  200.54   92.76
  -6   6   2  239.06   40.94
   6  -6   2  232.27   50.38
   6   6   3   13.79   12.04
   6  -6  -3    3.45    6.98
  -6   6  -3    5.14   17.43
  -6  -6   3   -4.03   21.19
   6   6  -3   29.95   27.50
  -6  -6  -3   -3.50   15.99
   6  -6   3   -4.45   16.21
  -6   6   3   19.15   16.06
   6   6   4  904.04   59.32
  -6   6  -4  880.81   56.14
  -6  -6   4  921.03   66.18
   6   6  -4  899.20   67.89
  -6   6   4  915.30   44.17
  -6  -6  -4  837.77   58.30
   6  -6   4 1010.51   69.84
  -6   6  -5   44.65   26.68
  -6  -6   5   55.14   33.48
  -6  -6  -5   23.58   34.56
  -6   6   5    7.04    8.78
   6   6  -5   26.69   18.89
   6  -6   5   32.98   23.57
  -6   6  -6  561.77   74.11
  -6   6   6  483.39   20.82
   6   6  -6  437.54   42.50
  -6   6   6  415.03   16.90
  -6  -6  -6  412.43   91.27
  -6   6  -7  202.16   45.28
  -6  -6  -7  121.24   35.33
   6   6  -7  125.41   33.26
  -6   6  -8   58.24   29.04
   6   6  -8   35.09   30.79
  -6   6  -9  177.61   43.19
   6   6  -9   62.57   38.83
  -6   6 -10  535.09  159.87
   6   6 -10  624.25  161.90
  -6   6 -11   96.04   43.99
   6   6 -11   55.41   22.95
  -6  -6 -11   57.79   27.01
  -6   6 -12  729.53  180.28
   6   6 -12  746.56   72.20
  -6  -6 -12  705.55  111.66
  -6   6 -13  203.36   74.91
   6   6 -13  167.47   50.38
  -6  -6 -13  128.11   57.86
  -6   6 -14   59.15   34.28
   6   6 -14   58.78   39.24
  -6  -6 -14   -8.97   22.55
  -6   6 -15   11.11   15.46
   6   6 -15   -0.17   26.41
  -6  -6 -15    1.97   23.25
  -6   6 -16  149.70   63.24
   6   6 -16  223.73   66.63
  -6  -6 -16  176.21   57.59
   6   6 -17   90.00   51.48
  -6  -6 -17   56.03   32.79
  -6   6 -18  217.71  106.11
   6   6 -18  260.91   58.87
  -6  -6 -18  245.36   69.61
  -6   6 -19   17.75   32.50
   6   6 -19   57.51   36.63
  -6  -6 -19   25.91   29.94
  -6   6 -20   64.43   57.05
   6   6 -20   45.51   32.50
  -6  -6 -20   48.04   24.09
  -6   6 -21   59.11   45.17
   6   7   0   30.80   30.45
  -6   7   0    2.15   20.79
   6  -7   0   -0.67   17.09
   6  -7  -1 2066.71   87.05
   6   7   1 2133.70  104.22
  -6  -7   1 2367.42  117.23
  -6   7  -1 2335.77   99.85
  -6  -7  -1 2204.82  107.64
  -6   7   1 2182.59  121.14
   6  -7   1 2214.66   97.02
   6   7  -1 2166.31  147.48
   6   7   2 4029.91  172.61
  -6   7  -2 4464.63  191.80
   6  -7  -2 4118.35  156.06
   6   7  -2 4129.41  175.08
  -6  -7  -2 4234.19  163.72
  -6   7   2 4246.42  161.97
   6  -7   2 4560.74  173.20
   6   7   3 2510.24  122.21
  -6   7  -3 2659.01  116.68
   6  -7  -3 2265.33   94.68
   6   7  -3 2314.45  138.75
  -6  -7  -3 2311.14  139.29
  -6   7   3 2351.70   92.80
   6  -7   3 2545.01  112.23
   6   7   4  283.84   83.10
  -6   7  -4  193.19   47.93
   6  -7  -4  227.10   27.15
  -6  -7  -4  206.80   49.77
   6   7  -4  189.56   52.89
  -6   7   4  262.26   43.41
   6  -7   4  190.48   51.96
  -6   7  -5 1617.01  101.19
  -6  -7  -5 1502.96  245.14
  -6   7   5 1894.23   94.00
   6   7  -5 1835.26  126.91
  -6   7  -6   -3.20   30.49
   6   7  -6   32.64   39.27
  -6   7   6   29.64   13.57
  -6   7  -7  764.01  197.40
   6   7  -7  912.25  196.69
  -6   7  -8  164.71   49.84
   6   7  -8  201.62   58.07
  -6   7  -9  813.93   66.35
   6   7  -9  519.20   56.83
  -6   7 -10  606.10  170.75
   6   7 -10  591.60  117.44
  -6   7 -11  377.00   98.90
   6   7 -11  506.05   69.04
  -6  -7 -11  491.67   59.03
  -6   7 -12  642.59  186.15
   6   7 -12  631.39   83.37
  -6  -7 -12  696.86  171.81
  -6   7 -13  116.71   51.78
   6   7 -13  164.68   56.22
  -6  -7 -13   42.68   36.56
  -6   7 -14  246.76   51.55
   6   7 -14  328.28   60.09
  -6  -7 -14  144.95   61.56
  -6   7 -15  296.91   81.56
   6   7 -15  400.35   67.19
  -6  -7 -15  260.09   76.84
  -6   7 -16  151.34   72.62
   6   7 -16  385.41   73.72
  -6  -7 -16  206.88   87.97
  -6   7 -17  250.62   69.14
   6   7 -17  263.69   74.91
  -6  -7 -17  274.12   79.20
  -6   7 -18   28.20   39.70
   6   7 -18  203.41   70.69
  -6   7 -19  167.59   69.55
   6   7 -19  239.14   60.64
  -6  -7 -19  180.29   59.37
  -6   7 -20  -27.55   38.21
   6   7 -20   48.09   53.87
  -6  -7 -20   21.31   16.46
   6   8   0 6415.89  315.39
  -6   8   0 6166.20  290.57
   6  -8   0 6253.31  294.49
   6   8   1  111.19   49.22
  -6   8  -1  171.40   46.50
   6  -8  -1  110.73   33.62
   6   8  -1  101.78   49.98
  -6   8   1   82.88   28.07
   6  -8   1   88.78   27.19
   6   8   2 1503.84  103.64
   6  -8  -2 1517.44  104.06
  -6   8  -2 1693.15  107.56
   6   8  -2 1717.22  164.63
   6  -8   2 1822.38  104.46
  -6   8   2 1580.97   89.59
   6   8   3  161.47   47.23
   6  -8  -3  128.75   49.18
  -6   8  -3  215.76   65.79
   6   8  -3   67.20   58.36
   6  -8   3  115.32   56.27
  -6   8   3  191.27   46.04
   6   8   4 1242.52   98.72
   6  -8  -4 1228.36   78.01
  -6   8  -4 1262.97   92.27
  -6   8   4 1263.46   82.56
   6   8  -4 1178.46   91.36
   6   8   5  510.87   46.75
   6  -8  -5  519.67   28.80
  -6   8  -5  578.35  106.81
  -6   8   5  528.38   50.96
   6   8  -5  514.85   94.19
  -6   8  -6 3288.43  218.26
   6   8  -6 3340.90  212.11
  -6   8   6 3454.58  191.06
  -6   8  -7  237.69   62.40
   6   8  -7  156.87   41.13
  -6   8  -8 2918.95  183.33
   6   8  -8 2997.43  178.95
  -6   8  -9   98.44   48.41
   6   8  -9   50.76   35.54
  -6   8 -10  546.48  160.21
   6   8 -10  515.11   92.34
  -6   8 -11   42.70   33.41
   6   8 -11   44.08   28.69
  -6   8 -12   20.66   23.90
   6   8 -12   41.39   30.36
  -6  -8 -12   13.63   23.87
  -6   8 -13   31.77   39.20
   6   8 -13    0.36   27.34
  -6  -8 -13  -28.50   22.55
  -6   8 -14  220.06   54.04
   6   8 -14  288.69   56.18
  -6  -8 -14  331.09  136.28
  -6   8 -15   51.92   19.44
   6   8 -15   33.62   27.22
  -6  -8 -15   52.30   31.73
  -6   8 -16   36.92   59.86
   6   8 -16   13.65   28.99
  -6  -8 -16   24.49   15.66
  -6   8 -17   20.44   43.68
   6   8 -17   61.10   55.11
  -6  -8 -17   22.67   24.35
  -6   8 -18  102.10   40.66
   6   8 -18  108.44   62.48
  -6  -8 -18   87.68   54.39
  -6   8 -19   74.57   63.66
  -6  -8 -19   62.87   31.85
  -6   8 -20  288.67   99.97
   6   8 -20  382.08  128.52
   6   9   0   41.28   23.20
  -6   9   0   62.40   31.16
   6   9   1 4306.37  258.54
   6  -9  -1 4420.62  256.38
  -6   9  -1 4488.73  270.54
  -6   9   1 4462.88  261.94
   6   9  -1 4692.97  282.87
   6   9   2   23.41   26.54
   6  -9  -2   30.80   14.23
  -6   9  -2   60.42   13.68
  -6   9   2   70.41   24.73
   6   9  -2   54.89   47.92
   6   9   3 2369.21  156.15
   6  -9  -3 2458.23  148.34
  -6   9  -3 2508.20  170.68
  -6   9   3 2297.52  139.44
   6   9  -3 2290.76  153.19
   6   9   4  787.62  100.12
  -6   9  -4  790.95   56.28
   6  -9  -4  723.81   38.28
   6   9  -4  543.12   84.13
   6   9   5 3702.53  160.33
   6  -9  -5 3659.38  114.20
  -6   9  -5 3693.90  168.01
  -6   9   5 3746.53  120.34
   6   9  -5 3530.68  166.11
   6  -9  -6   47.62   20.70
  -6   9  -6   70.98   55.07
  -6   9   6  112.72   20.72
   6   9  -6   88.05   41.71
  -6   9  -7 2787.00  186.50
   6   9  -7 2552.48  174.08
  -6   9   7 2725.68  139.19
  -6   9  -8  411.44  124.78
   6   9  -8  403.50  136.58
  -6   9  -9 1316.36   87.24
   6   9  -9 1568.57  244.04
  -6   9 -10  691.14  147.70
   6   9 -10  687.91  169.95
  -6   9 -11 1630.43  121.07
   6   9 -11 1554.49  197.48
  -6   9 -12   48.91   31.36
   6   9 -12   85.70   55.48
  -6   9 -13  578.98  252.93
   6   9 -13  659.66   86.86
  -6  -9 -13  605.72  171.09
  -6   9 -14  437.69   65.94
   6   9 -14  416.26   61.19
  -6  -9 -14  435.17   75.48
  -6   9 -15  535.75  227.90
   6   9 -15  599.62   91.29
  -6  -9 -15  481.04  125.35
  -6   9 -16  193.06   46.88
   6   9 -16  303.06   68.51
  -6  -9 -16  238.56  156.75
  -6   9 -17  251.74  130.32
   6   9 -17  397.14   74.15
  -6   9 -18  153.86   56.53
   6   9 -18   80.13   45.45
  -6  -9 -18   -0.77   30.86
  -6   9 -19  337.43  109.27
   6   9 -19  219.05  102.45
   6  10   0 5575.89  196.05
  -6  10   0 6052.05  194.42
   6 -10   0 5528.59  178.90
   6  10   1  278.54   91.35
  -6  10  -1  264.33   69.34
   6 -10  -1   65.34   51.59
   6  10  -1  183.01   64.10
   6 -10   1   67.58   45.66
   6  10   2  307.72  103.96
   6 -10  -2  109.84   52.24
  -6  10  -2  354.94   57.95
  -6  10   2  271.99   95.81
   6  10  -2  232.33   72.15
   6  10   3  429.04  146.33
   6 -10  -3  284.78  109.47
  -6  10  -3  429.52   77.28
  -6  10   3  444.34   69.45
   6  10  -3  373.71  143.25
   6  10   4   77.93   25.18
   6 -10  -4   65.04   18.50
  -6  10  -4   94.10   42.62
  -6  10   4  104.92   27.05
   6  10  -4   72.58   32.07
   6  10   5   80.16   42.06
   6 -10  -5   -3.23   11.29
  -6  10  -5   91.37   45.20
  -6  10   5   25.00   13.36
   6  10  -5  103.96   71.89
   6  10   6  318.87   97.80
   6 -10  -6  289.17   64.49
  -6  10  -6  291.82  131.79
  -6  10   6  288.35   28.97
   6  10  -6  386.40   79.32
  -6  10  -7    9.09   31.14
   6  10  -7   -4.03   32.12
  -6  10  -8   89.16   34.16
   6  10  -8  108.01   60.02
  -6  10  -9   37.46   40.69
   6  10  -9   24.23   14.35
  -6  10 -10   76.58   38.32
   6  10 -10   90.41   43.48
  -6  10 -11   18.44   39.32
   6  10 -11   23.19   40.13
  -6  10 -12 1322.46  158.56
   6  10 -12 1045.63  151.31
  -6  10 -13    0.33   40.73
   6  10 -13  112.37   63.21
  -6 -10 -13   84.77   40.95
  -6  10 -14  288.34   66.53
   6  10 -14  279.66   65.05
  -6 -10 -14  133.61   89.96
  -6  10 -15   88.82   60.76
   6  10 -15    8.00   35.22
  -6 -10 -15   29.97   28.85
  -6  10 -16    9.41   40.49
   6  10 -16   69.21   39.44
  -6  10 -17   29.92   33.85
   6  10 -17   31.92   37.48
  -6  10 -18   -0.23   40.64
   6  11   0   38.43   26.95
  -6  11   0   46.85   18.85
   6 -11   0   33.56   14.75
   6  11   1 1511.99   94.00
  -6  11  -1 1473.08   90.60
   6  11  -1 1369.12  151.68
  -6  11   1 1480.64   83.05
   6  11   2  954.35  239.69
   6 -11  -2  763.71   51.70
  -6  11  -2  871.01   74.99
  -6  11   2  640.94  108.82
   6  11  -2  912.64  218.83
   6  11   3 3626.74  169.83
   6 -11  -3 3592.16  141.61
  -6  11  -3 3439.93  157.23
  -6  11   3 3590.97  163.43
   6  11  -3 3604.81  172.69
   6  11   4  243.95   71.39
   6 -11  -4  177.34   74.55
  -6  11  -4  328.91   57.33
  -6  11   4  272.81   35.56
   6  11  -4  248.19   96.92
   6  11   5 1701.29  131.76
   6 -11  -5 1589.93  105.11
  -6  11  -5 1360.33  175.59
  -6  11   5 1699.40  107.30
   6  11  -5 1610.21  132.28
   6  11   6  151.70   45.09
   6 -11  -6  125.59   57.44
  -6  11  -6  248.51   47.44
  -6  11   6  202.54   32.71
   6  11  -6  234.13   86.60
  -6  11  -7 1684.42  126.71
  -6  11   7 1960.18   95.76
   6  11  -7 1791.74  136.66
  -6  11  -8   81.39   38.08
   6  11  -8  130.02   68.20
  -6  11  -9 1795.25  143.11
   6  11  -9 1749.42  134.56
  -6  11 -10  593.35   80.20
   6  11 -10  414.36  106.30
  -6  11 -11 1186.22  128.94
   6  11 -11 1001.33  228.07
  -6  11 -12   13.27   49.79
   6  11 -12   15.32   34.72
  -6  11 -13  402.19  241.49
   6  11 -13  667.50  210.32
  -6  11 -14   45.17   42.89
   6  11 -14  169.99   75.19
  -6 -11 -14   47.09   35.03
  -6  11 -15  397.81  114.62
   6  11 -15  393.11   69.54
  -6  11 -16  289.10   84.90
   6  11 -16  328.46   67.75
  -6 -11 -16  188.83   59.21
  -6  11 -17   49.98   47.11
   6  11 -17   58.99   44.26
   6  12   0  228.47   60.95
  -6  12   0  154.16   53.10
   6  12   1   39.93   36.25
  -6  12  -1  120.14   53.18
   6  12  -1   88.93   35.08
  -6  12   1   28.84   24.40
   6  12   2   69.95   28.43
   6 -12  -2   24.02   16.72
  -6  12  -2   97.33   49.73
  -6  12   2   79.99   35.96
   6  12  -2   94.28   52.26
   6  12   3  643.23  193.87
   6 -12  -3  751.75   61.89
  -6  12  -3  814.24   83.59
  -6  12   3  825.43  110.25
   6  12  -3  800.74  213.27
   6 -12  -4  530.37   74.82
  -6  12  -4  481.48  171.81
  -6  12   4  624.47   52.78
   6  12  -4  582.50  175.51
   6  12   5   52.06   27.23
  -6  12  -5   78.08   46.06
   6  12  -5   44.62   49.35
  -6  12   5   29.97   23.31
   6  12   6  871.32  173.53
  -6  12  -6 1155.09  108.39
   6  12  -6 1224.75  109.41
  -6  12   6 1224.74   78.32
  -6  12  -7   42.00   35.78
  -6  12   7   44.00   17.91
   6  12  -7   98.43   59.50
  -6  12  -8 1046.90  113.13
   6  12  -8  907.48  154.65
  -6  12  -9   69.68   40.42
   6  12  -9   43.84   53.26
  -6  12 -10  204.52   65.18
   6  12 -10  336.25   77.79
  -6  12 -11  265.22   70.60
   6  12 -11  106.74   57.03
  -6  12 -12   37.69   42.78
   6  12 -12   44.81   36.75
  -6  12 -13  249.89   63.53
   6  12 -13  299.22   96.77
  -6  12 -14  128.74   67.06
   6  12 -14   80.44   47.27
  -6 -12 -14   43.31   29.84
  -6  12 -15  197.96   78.49
   6  12 -15    6.16   29.44
  -6 -12 -15   14.18   23.97
  -6  12 -16   31.06   38.67
   6  12 -16   57.31   38.92
   6  13   0   24.81   42.24
  -6  13   0  103.94   49.88
   6  13   1 1061.65  100.06
  -6  13  -1 1088.78  185.22
   6  13  -1 1062.85  111.21
  -6  13   1 1075.56   99.16
   6  13   2  530.05  164.15
  -6  13  -2  522.70  117.05
   6  13  -2  656.42  147.76
  -6  13   2  589.11   64.30
   6  13   3 2245.56  181.30
  -6  13  -3 2050.58  200.36
   6  13  -3 2346.99  189.05
  -6  13   3 2304.02  156.32
   6  13   4  311.94  106.66
  -6  13  -4  380.97   95.39
   6  13  -4  330.46   80.77
  -6  13   4  392.88   45.26
   6  13   5  238.45  110.51
  -6  13  -5  418.60   59.39
   6  13  -5  343.02   97.89
   6  13   6   28.79   19.83
  -6  13  -6   71.46   53.73
   6  13  -6   51.77   29.21
  -6  13   6   -5.91   12.34
   6  13   7   45.14   19.41
  -6  13  -7   19.99   27.86
   6  13  -7   36.13   29.59
  -6  13  -8  250.80   75.36
   6  13  -8   45.98   40.99
  -6  13  -9  189.67   73.57
   6  13  -9   68.88   50.60
  -6  13 -10  626.98   75.01
   6  13 -10  621.81  152.16
  -6  13 -11  577.70   91.85
   6  13 -11  475.51  101.91
  -6  13 -12  134.53   59.59
  -6  13 -13  486.50   97.21
   6  13 -13  485.66  114.37
  -6  13 -14  168.43   81.06
   6  13 -14  127.26   49.38
  -6 -13 -14   85.41   40.48
  -6  13 -15  300.10   92.85
   6  13 -15  246.62  121.99
   6  14   0  397.86  182.95
  -6  14   0  528.29  165.71
   6  14   1   66.68   35.48
  -6  14  -1   58.94   42.44
   6  14  -1  143.43   51.87
  -6  14   1   39.16   30.53
   6  14   2  673.27  195.92
  -6  14  -2  664.98  166.53
   6  14  -2  583.98  270.62
  -6  14   2  758.88   76.52
   6  14   3   86.79   57.88
  -6  14  -3   18.02    8.65
   6  14  -3   86.40   51.70
  -6  14   3   24.51   19.62
   6  14   4   14.18   21.94
  -6  14  -4   26.26   31.09
   6  14  -4    2.89   22.52
  -6  14   4   15.84   27.43
   6  14   5  132.51   69.77
  -6  14  -5  281.00  107.08
   6  14  -5  366.28   96.23
  -6  14   5  230.52   48.00
   6  14   6   77.20   43.36
  -6  14  -6  188.97   91.81
   6  14  -6  126.84   62.12
   6  14   7   63.96   31.12
  -6  14  -7   80.22   55.32
   6  14  -7   43.36   31.99
  -6  14  -8   26.23   33.86
  -6  14  -9  233.36   87.37
   6  14  -9  198.84   67.30
  -6  14 -10   33.24   48.27
   6  14 -10   44.52   42.81
  -6  14 -11   99.81   55.66
   6  14 -11   57.86   38.43
  -6  14 -12  157.73   69.71
   6  14 -12  265.04   93.75
  -6  14 -13   44.78   51.20
   6  14 -13   -3.83   40.10
   6  15   0  107.12   39.16
  -6  15   0   88.98   41.87
   6  15   1   54.29   33.96
   6  15  -1   46.40   32.62
  -6  15   1   21.85   28.82
   6  15   2  355.04  105.87
  -6  15  -2  263.39  131.78
   6  15  -2  444.53   97.87
  -6  15   2  337.50  115.50
   6  15   3   90.14   65.86
  -6  15  -3  119.02   68.06
   6  15  -3  143.88   43.28
   6  15   4  366.79  168.73
  -6  15  -4  342.83   67.34
   6  15  -4  384.91   79.33
  -6  15   4  369.39   54.47
   6  15   5   87.17   51.07
  -6  15  -5   51.97   49.35
   6  15  -5   68.79   33.88
   6  15   6   26.06   40.40
  -6  15  -6  107.04   68.41
   6  15  -6    5.93   25.97
   6  15   7   60.67   34.22
  -6  15  -7   39.82   37.60
   6  15  -7    2.92   31.34
  -6  15  -8   92.49   68.19
   6  15  -8   71.54   49.75
  -6  15  -9  126.47   59.99
   6  15  -9  103.50   45.48
  -6  15 -10  353.98  249.22
   6  15 -10  469.01  100.84
   6  15 -11   50.36   25.78
  -6  15 -12   40.17   42.10
   6  16   0   61.69   41.54
  -6  16   0   40.85   32.87
   6  16   1   15.32   15.43
  -6  16  -1   48.36   42.16
   6  16  -1   26.55   40.83
  -6  16   1   72.47   51.92
   6  16   2   32.64   41.89
  -6  16  -2   76.33   48.56
   6  16  -2   68.24   58.81
   6  16   3   68.52   43.38
  -6  16  -3   56.11   33.68
   6  16  -3   40.59   47.62
  -6  16  -4   69.17   54.21
   6  16  -4   20.47   32.75
   6  16   5   64.82   33.84
   6  16  -5   67.76   32.62
   6  16   6   96.97   48.70
  -6  16  -6   51.90   86.75
   6  16  -6  132.20   37.49
   6  16   7   -0.45   38.28
  -6  16  -7   79.93   65.28
   6  16  -7   63.26   46.91
  -6  16  -8   69.20   46.83
   6  16  -8   56.21   42.36
  -6  16  -9   79.86   50.05
   6  16  -9   81.86   45.20
   6  17   0  101.47   47.06
  -6  17  -1   98.56   57.02
   6  17  -1   82.70   45.55
   6  17   2   84.96   71.60
  -6  17  -2  167.34   61.18
   6  17  -2   82.74   59.08
   6  17   3  127.35   73.26
  -6  17  -3  129.80   59.30
   6  17  -3  229.21  110.59
   6  17   4   19.31   46.95
  -6  17  -4   65.19   51.86
   6  17   5   80.12   47.23
   6  17  -5   94.65   48.56
  -6  17  -6  160.26   81.99
   6  17  -6  163.94   53.04
  -7   0   0   24.45   13.10
  -7   0   1   15.38   14.21
  -7   0   2 1959.87   63.96
  -7   0   3    4.95   19.36
  -7   0  -3   11.69   20.18
  -7   0   4 1265.54   52.76
  -7   0  -4 1308.84   69.80
   7   0  -5   19.65   20.36
  -7   0   5   37.41   21.48
  -7   0  -5   39.31   25.75
  -7   0   6  108.59   26.47
  -7   0  -6  124.17   36.46
   7   0  -7   16.64   18.75
  -7   0   7   90.29   34.71
  -7   0  -7   30.15   34.33
   7   0  -8  580.81   59.70
  -7   0   8  500.78   56.37
  -7   0  -8  686.44   71.38
   7   0  -9   20.92   18.09
  -7   0   9   19.68   16.39
  -7   0  -9   32.63   24.14
   7   0 -10 1593.36  105.33
  -7   0  10 1588.24   99.40
  -7   0 -10 1443.59  161.56
   7   0 -11    2.54   13.80
  -7   0 -11   22.89   32.67
   7   0 -12  489.73   90.13
  -7   0  12  381.53   39.86
  -7   0 -12  559.49  125.67
   7   0 -13   20.40   16.01
  -7   0  13    1.27    8.82
  -7   0 -13   48.58   32.67
   7   0 -14  351.72   84.24
  -7   0  14  232.67   71.14
  -7   0 -14  317.04  131.50
   7   0 -15   19.85   24.56
  -7   0  15   -1.48   13.62
  -7   0 -15   18.51   20.95
   7   0 -16  580.89   56.14
  -7   0 -16  579.29  150.83
   7   0 -17    2.40   19.77
  -7   0 -17   50.66   42.85
  -7   0 -18  696.75   76.17
  -7   0 -19   28.71   19.59
  -7   0 -20   -7.14   33.56
  -7   0 -21   28.81   37.74
  -7   0 -22   97.63   52.03
  -7  -1   0  740.46   58.06
  -7   1  -1  172.57   38.27
  -7  -1   1  104.70   23.28
  -7   1   1  151.14   65.45
  -7  -1  -1  128.55   33.76
  -7   1  -2 1876.72   71.69
  -7  -1   2 1851.45   70.66
  -7  -1  -2 1940.96   67.92
  -7   1   2 2042.33  140.55
  -7   1  -3 4828.60  124.20
  -7  -1   3 4801.46  125.94
  -7  -1  -3 4765.25  117.32
   7   1  -3 4880.23  112.49
  -7   1  -4  148.47   32.03
  -7  -1   4  168.96   30.88
  -7   1   4  214.77   56.79
   7   1  -4  143.27   32.92
  -7   1  -5   17.70   30.99
  -7  -1   5   18.15   16.08
  -7   1   5   13.68   15.72
   7   1  -5    8.30   16.09
  -7  -1  -5   34.82   37.64
  -7   1  -6   -0.73   27.00
  -7  -1   6    4.07   14.15
   7   1  -6   22.08   15.55
  -7  -1  -6   20.45   28.81
  -7   1   6   -4.55   11.14
  -7   1  -7 1447.76  104.00
  -7  -1   7 1575.30  140.50
  -7   1   7 1422.40   62.17
   7   1  -7 1352.47   64.92
  -7  -1  -7 1398.62   74.70
   7  -1  -8  127.58   28.40
  -7   1  -8   69.93   27.34
  -7  -1   8  143.70   34.83
  -7   1   8  111.64   26.64
   7   1  -8  200.43   40.55
  -7  -1  -8   70.66   44.15
  -7   1  -9   80.21   36.78
  -7  -1   9  152.82   40.32
  -7   1   9  179.87   21.52
   7   1  -9  157.85   25.12
  -7  -1  -9  170.59   39.21
   7  -1 -10 1112.03   72.95
  -7   1 -10  949.92  101.15
   7   1 -10  991.31  171.86
  -7  -1 -10 1364.54  177.05
  -7   1 -11  536.10   77.03
  -7  -1  11  561.09   94.66
   7   1 -11  528.26   71.92
  -7  -1 -11  513.87   78.08
  -7   1  11  482.62   80.05
  -7   1 -12  913.92  207.47
  -7  -1  12  887.94   67.04
  -7   1  12  852.56   54.97
   7   1 -12  959.42   86.75
  -7  -1 -12  938.00   96.58
  -7  -1  13 2028.69  119.77
  -7   1 -13 2347.41  151.35
   7   1 -13 2089.41  140.36
  -7   1  13 2120.81  130.68
  -7  -1 -13 2457.56  158.44
   7  -1 -14  912.74  126.73
  -7   1 -14  970.03  271.62
   7   1 -14  961.34  136.88
  -7   1  14  903.57   62.95
  -7  -1 -14  791.17   99.10
   7  -1 -15   31.95   17.55
  -7  -1  15   23.90   16.03
  -7   1 -15   55.08   33.36
   7   1 -15    3.40   12.34
  -7   1  15    1.59    8.28
  -7  -1 -15  145.28   51.89
   7  -1 -16    8.63   14.90
  -7   1 -16  131.66   56.57
   7   1 -16   20.15   19.19
  -7  -1 -16   50.42   17.39
  -7   1 -17  168.11   64.27
   7   1 -17  119.71   52.18
  -7  -1 -17  191.42   57.71
  -7   1 -18   82.51   45.00
  -7  -1 -18   99.27   43.31
  -7   1 -19   34.16   37.87
   7   1 -19   55.60   30.20
  -7  -1 -19   -6.40   37.31
  -7   1 -20   12.10   29.96
  -7  -1 -20   24.83   17.89
  -7   1 -21   37.24   39.70
  -7  -1 -21   16.36   37.18
  -7   1 -22   44.84   48.96
  -7  -1 -22   76.31   59.41
  -7  -2   0   10.91   22.54
  -7   2   0   28.93   21.18
  -7   2  -1 3856.91   99.64
  -7  -2   1 3769.01  125.48
   7   2  -1 3430.76  119.02
  -7   2   1 3827.70   95.35
  -7  -2  -1 3841.85  108.40
  -7  -2   2 1412.55   64.48
  -7   2  -2 1323.89   61.74
   7   2  -2 1343.80   63.29
  -7  -2  -2 1204.95   54.64
  -7   2   2 1333.59   50.11
  -7   2   2 1181.64   56.39
  -7  -2   3  481.23   97.80
  -7   2  -3  509.64   41.54
  -7  -2  -3  512.72  113.75
  -7   2   3  551.63   57.82
   7   2  -3  574.94  129.44
  -7  -2   4  178.83   36.55
  -7   2  -4  115.66   28.33
  -7   2   4  188.12   45.87
  -7  -2  -4  194.59   48.54
   7   2  -4  178.13   40.90
  -7  -2   5  790.30   61.24
  -7   2  -5  670.92  146.72
  -7   2   5  681.90   51.84
   7   2  -5  707.81   98.29
  -7  -2  -5  537.19  111.14
  -7   2  -6  611.18  147.78
  -7  -2   6  553.05   42.16
  -7   2   6  579.19   33.89
   7   2  -6  623.55   73.36
  -7  -2  -6  621.65  147.27
  -7   2  -7   79.80   45.49
  -7  -2   7   87.09   29.02
  -7   2   7   50.24   15.37
   7   2  -7   20.89   19.47
  -7  -2  -7  114.00   39.00
  -7   2  -8  890.36  118.88
  -7  -2   8  834.62   98.22
  -7   2   8  850.59   91.27
   7   2  -8  693.63   60.18
  -7  -2  -8  759.63   61.33
  -7   2  -9  311.49   68.85
  -7  -2   9  386.46   85.97
  -7   2   9  328.79   34.32
   7   2  -9  386.88  103.52
  -7  -2  -9  360.46  113.15
  -7   2 -10 1711.16  132.53
   7   2 -10 1707.64  109.68
  -7   2  10 1639.00   99.12
  -7  -2 -10 1460.58  113.72
   7  -2 -11   13.64   14.53
  -7   2 -11   26.31   28.97
   7   2 -11   25.71   17.39
  -7   2  11   14.69   10.66
  -7  -2 -11  114.99   45.03
   7  -2 -12   88.30   27.76
  -7   2 -12   59.96   33.77
  -7  -2  12  100.07   31.67
  -7   2  12   76.60   25.14
   7   2 -12  164.11   34.08
  -7  -2 -12   99.18   43.80
   7  -2 -13    0.83    6.16
  -7   2 -13   69.08   35.18
  -7  -2  13   64.97   30.09
  -7   2  13    8.57   11.77
   7   2 -13   22.17   12.94
  -7  -2 -13   41.34   36.92
   7  -2 -14  963.32   64.93
  -7   2 -14  772.60  200.61
   7   2 -14  834.14   75.31
  -7   2  14  833.75   55.48
  -7  -2 -14  745.16  118.94
   7  -2 -15  581.85   56.23
  -7   2 -15  533.50  132.03
   7   2 -15  636.69  160.13
  -7  -2 -15  661.30   66.76
  -7   2 -16  188.95   54.29
   7   2 -16  265.65   63.43
  -7  -2 -16  108.62   40.11
  -7   2 -17  328.10   45.22
   7   2 -17  330.58  110.31
  -7  -2 -17  298.33  131.92
  -7   2 -18  102.78   50.24
   7   2 -18   37.97   22.07
  -7  -2 -18   95.80   58.26
  -7   2 -19  115.72   43.11
   7   2 -19   77.64   34.29
  -7  -2 -19   55.56   35.72
  -7   2 -20   11.18   32.06
  -7  -2 -20   46.89   45.07
  -7   2 -21   40.87   36.75
  -7  -2 -21   78.86   61.57
   7   3   0 1803.16   98.38
  -7  -3   0 1765.86   69.62
  -7   3   0 1646.84   68.02
  -7   3  -1   -9.25   23.51
  -7  -3   1   28.68   16.73
   7   3  -1    4.35   15.96
  -7   3   1   26.53   20.09
  -7  -3  -1   32.55   20.71
  -7   3  -2  126.49   32.08
  -7  -3   2  135.74   37.85
  -7  -3  -2   74.97   18.85
   7   3  -2  112.62   26.57
  -7   3   2  171.12   43.32
  -7  -3   3  116.84   28.91
  -7   3  -3  182.99   50.64
   7   3  -3   84.66   27.10
  -7   3   3   51.90   18.81
  -7  -3  -3   80.21   28.24
  -7   3   3   97.19   32.10
  -7  -3   4 5463.89  238.05
  -7   3  -4 5133.54  238.31
   7   3  -4 5331.69  233.51
  -7   3   4 5078.02  211.56
  -7  -3  -4 5183.11  236.98
  -7   3   4 5122.57  222.60
   7  -3   4 5221.76  227.89
  -7  -3   5   48.33   26.99
  -7   3  -5   10.64   19.83
   7   3  -5   19.03   17.96
  -7  -3  -5   31.41   20.31
  -7   3   5   14.72   22.07
  -7   3   5   30.64   17.78
   7  -3   5   34.35   13.91
  -7  -3   6 9266.86  313.26
  -7   3  -6 8902.90  310.69
  -7   3   6 9069.89  296.24
  -7  -3  -6 9291.22  315.14
   7   3  -6 8917.57  312.68
   7  -3   6 8893.33  304.32
  -7   3   6 8654.39  282.98
  -7  -3   7   17.44   21.53
  -7   3  -7   83.70   41.10
  -7   3   7   55.15   15.50
  -7  -3  -7   25.28   38.63
   7   3  -7   14.68   26.72
  -7   3   7   27.19   16.77
  -7  -3   8 5748.35  273.84
   7   3  -8 5877.79  283.06
  -7   3   8 5534.78  253.35
  -7   3  -9   -4.12   30.09
  -7  -3   9   19.76   13.95
  -7   3   9   -3.04    5.84
   7   3  -9   27.37   17.10
  -7  -3  -9   34.50   45.18
  -7   3 -10 1672.20  126.98
  -7  -3  10 1626.21  107.28
  -7   3  10 1538.58   91.12
   7   3 -10 1700.61  231.66
  -7  -3 -10 1510.03  120.13
  -7   3 -11   87.17   46.62
  -7  -3  11   62.49   32.04
  -7   3  11   43.83   17.41
   7   3 -11   36.21   30.03
  -7  -3 -11   95.87   42.54
  -7  -3  12  266.90   46.11
  -7   3 -12  242.49   60.85
   7   3 -12  159.88   38.44
  -7   3  12  214.37   26.04
  -7  -3 -12  226.81   95.00
  -7   3 -13  228.57   64.46
   7   3 -13  161.93   47.09
  -7  -3 -13  248.74   65.81
  -7   3  13  162.98   23.77
  -7   3 -14   77.55   42.04
   7   3 -14   32.77   32.86
  -7  -3 -14  118.09   47.05
  -7   3 -15   -7.52   33.26
   7   3 -15   54.35   21.66
  -7  -3 -15   19.77   30.29
  -7   3 -16  293.46   93.88
   7   3 -16  445.04  103.57
  -7  -3 -16  396.41  102.83
  -7   3 -17   75.00   47.26
   7   3 -17   13.45   27.92
  -7  -3 -17   48.95   45.94
  -7   3 -18  633.68  161.33
   7   3 -18  541.25   93.37
  -7  -3 -18  490.35  231.95
  -7   3 -19   19.82   38.79
  -7  -3 -19   26.86   35.93
  -7   3 -20  462.48  199.87
  -7  -3 -20  473.36  152.21
  -7   3 -21   23.51   28.99
  -7  -3 -21   42.61   35.98
   7   4   0   46.29   22.41
  -7  -4   0  -18.47   19.46
  -7   4   0   -5.62   20.43
   7   4   1 3310.89  171.83
  -7  -4   1 3377.31  161.57
  -7   4  -1 3589.66  162.77
   7   4  -1 3393.71  158.97
  -7   4   1 3594.25  159.78
  -7   4  -2  706.82   59.48
  -7  -4   2  707.02  151.29
  -7   4   2  818.97   76.67
   7   4  -2  860.99  121.76
   7  -4   2  720.10   48.98
  -7   4  -3 4457.05  213.76
   7   4  -3 4131.19  200.04
  -7   4   3 4516.54  199.22
  -7  -4  -3 4079.05  196.24
   7  -4   3 4514.74  201.74
  -7  -4   4 2014.62  112.48
  -7   4  -4 1805.91  101.11
   7   4  -4 2013.26  118.27
  -7   4   4 1968.36   92.75
  -7   4   4 1934.00  102.70
  -7  -4  -4 1653.96  102.67
   7  -4   4 1780.67   97.65
  -7  -4   5 1671.12   90.53
  -7   4  -5 1599.12   85.22
  -7   4   5 1651.33   67.72
  -7  -4  -5 1765.33  102.26
  -7   4   5 1744.49   72.64
   7   4  -5 1620.76   87.30
   7  -4   5 1902.48   89.40
  -7   4  -6   42.53   17.55
  -7  -4   6   -3.82   19.45
   7   4  -6   33.82   26.59
  -7   4   6    9.51    7.11
  -7   4   6    4.34    6.54
   7  -4   6    8.40   22.48
  -7   4  -7  812.65   78.18
  -7  -4   7  900.72   69.06
  -7   4   7  892.63   47.96
   7   4  -7  875.17  165.52
  -7   4   7  926.87   51.32
  -7  -4   8   93.62   32.06
  -7   4  -8   68.34   33.66
   7   4  -8  147.45   30.62
  -7   4   8  115.28   33.83
  -7   4  -9  447.74   51.37
  -7  -4   9  422.44  102.38
  -7   4   9  450.85   19.56
   7   4  -9  427.91   68.11
  -7  -4  -9  528.01  141.69
  -7   4 -10 1518.48   89.23
   7   4 -10 1484.79  119.77
  -7  -4 -10 1310.85   98.81
  -7   4 -11  726.55  105.55
   7   4 -11  621.35  117.05
  -7  -4 -11  686.26   84.50
  -7   4 -12  268.19   55.95
   7   4 -12  197.92   63.56
  -7  -4 -12  340.98   60.66
  -7   4 -13   76.49   52.82
   7   4 -13   29.96   26.62
  -7  -4 -13   49.30   33.98
  -7   4 -14   77.66   51.60
   7   4 -14  129.61   40.43
  -7  -4 -14   69.09   39.39
  -7   4 -15  517.54  181.96
   7   4 -15  572.39  128.99
  -7  -4 -15  652.54   84.61
  -7   4 -16  874.52  101.26
   7   4 -16  854.18  229.09
  -7  -4 -16  640.27  138.76
  -7   4 -17  696.67   76.98
   7   4 -17  691.59  181.30
  -7  -4 -17  705.45   74.56
  -7   4 -18   90.20   72.58
  -7  -4 -18  310.18   54.54
  -7   4 -19  153.95   80.49
  -7  -4 -19  132.39   74.55
  -7   4 -20   35.04   25.17
   7   4 -20   37.17   24.20
  -7  -4 -20   78.85   33.78
  -7  -4 -21   99.32   48.53
   7   5   014363.34  585.44
  -7  -5   013515.64  554.76
  -7   5   015090.77  199.62
   7  -5   014367.70  579.01
   7   5   1  201.72   43.95
  -7  -5   1  175.61   55.51
  -7   5  -1  208.35   39.73
   7   5  -1  160.17   52.80
  -7  -5  -1  149.83   39.14
  -7   5   1  195.98   65.90
   7  -5   1  227.01   61.32
   7   5   2 7849.23  333.21
  -7   5  -2 8306.33  348.92
  -7  -5   2 7944.06  337.92
  -7  -5  -2 7931.86  336.61
   7   5  -2 8093.41  346.35
  -7   5   2 8376.09  347.00
   7  -5   2 8296.98  345.77
  -7   5  -3   44.24   23.70
  -7  -5   3   21.41   17.42
  -7  -5  -3   49.78   29.24
   7   5  -3   71.82   40.21
  -7   5   3   36.72   18.17
   7  -5   3   27.86   34.17
  -7   5  -4  839.50   81.05
  -7  -5   4  906.53   66.51
  -7  -5  -4  783.25   95.66
   7   5  -4  853.55   97.35
  -7   5   4  783.95   58.23
   7  -5   4  879.79   56.25
  -7  -5   5   39.07   31.52
  -7   5  -5   58.65   32.65
  -7  -5  -5    4.62   20.34
  -7   5   5    1.72   10.19
  -7   5   5   19.65   15.96
   7   5  -5   58.96   31.15
   7  -5   5   18.67   15.84
  -7   5  -6   99.80   40.89
  -7  -5   6   72.07   31.00
  -7   5   6   71.39   20.42
   7   5  -6   53.00   24.93
  -7   5  -7  478.84  123.32
  -7   5   7  274.46   38.96
  -7   5   7  314.71   39.59
   7   5  -7  306.33   63.24
  -7   5  -8   59.87   29.98
   7   5  -8   22.21   32.83
  -7   5   8   27.83    9.92
  -7   5  -9   95.01   36.05
   7   5  -9   36.90   35.89
  -7   5 -10  874.74   66.79
   7   5 -10 1177.02   99.20
  -7  -5 -10  944.17   69.48
  -7   5 -11  -10.80   34.42
   7   5 -11   65.09   44.54
  -7  -5 -11   -1.04   27.74
  -7   5 -12 5379.22  222.30
   7   5 -12 4600.84  236.49
  -7  -5 -12 5357.42  231.17
  -7   5 -13   33.92   43.38
   7   5 -13  122.95   37.18
  -7  -5 -13   54.36   45.64
  -7   5 -14 2359.12  155.20
   7   5 -14 1952.69  127.16
  -7  -5 -14 2046.71  123.92
  -7   5 -15   59.14   35.39
   7   5 -15  113.81   46.92
  -7  -5 -15   80.15   54.89
  -7   5 -16  569.26  184.14
   7   5 -16  686.27  168.28
  -7  -5 -16  712.69   89.41
  -7   5 -17   88.43   46.56
   7   5 -17  105.11   46.59
  -7  -5 -17   46.67   23.24
  -7   5 -18  163.08  116.04
  -7  -5 -18  200.37  129.78
  -7   5 -19   -5.14   36.23
   7   5 -19   37.74   44.58
  -7  -5 -19   37.08   26.98
  -7   5 -20   46.68   37.10
   7   5 -20   -7.79   25.12
  -7  -5 -20   97.99   32.74
  -7   5 -21   12.48   37.54
   7   5 -21   45.17   24.23
   7   6   0   19.64   24.43
  -7  -6   0   44.11   24.34
  -7   6   0   19.29   25.92
   7  -6   0   20.54   21.47
   7   6   1 2874.66  132.09
  -7  -6   1 2942.80  123.20
  -7   6  -1 3104.44  135.19
   7  -6  -1 3034.22  116.46
   7   6  -1 3268.92  141.13
  -7   6   1 3233.01  126.21
   7  -6   1 3230.50  129.30
   7   6   2 1213.13   70.40
  -7   6  -2 1251.00  122.75
   7   6  -2 1620.34  150.52
  -7   6   2 1252.74   64.38
   7  -6   2 1235.52  104.24
   7   6   3 3740.08  166.84
  -7   6  -3 3526.25  152.77
   7   6  -3 3560.04  151.73
   7  -6   3 3693.96  146.54
  -7   6  -4   80.64   36.43
   7   6  -4   53.64   36.47
  -7   6   4   21.07   14.34
   7  -6   4   32.58   34.95
  -7   6  -5 2773.07  153.67
   7   6  -5 2913.15  158.85
  -7   6   5 2743.44  132.15
  -7   6  -6  137.68   34.27
   7   6  -6  119.79   41.08
  -7   6   6  139.47   42.14
  -7   6  -7 1623.37  123.01
   7   6  -7 1399.22  111.59
  -7   6   7 1402.60   80.48
  -7   6  -8  100.76   26.03
   7   6  -8  136.32   41.18
  -7   6  -9 1390.06   92.73
   7   6  -9 1434.05  109.82
  -7   6 -10  449.56  197.18
   7   6 -10  519.75  108.77
  -7   6 -11  678.80   67.91
   7   6 -11  904.17  231.63
  -7  -6 -11  610.30  176.74
  -7   6 -12   70.38   77.63
   7   6 -12   52.55   30.01
  -7  -6 -12   68.98   60.38
  -7   6 -13  184.73   68.07
   7   6 -13  321.22   68.56
  -7  -6 -13  155.14   54.08
  -7   6 -14  260.11   81.73
   7   6 -14  294.70   77.36
  -7  -6 -14  168.31   79.97
  -7   6 -15  282.03  107.10
   7   6 -15  322.74   77.87
  -7  -6 -15  155.85   99.58
  -7   6 -16  266.84  107.29
   7   6 -16  411.36   90.24
  -7  -6 -16  222.58  120.21
  -7   6 -17  211.17   99.87
   7   6 -17  189.47   57.61
  -7  -6 -17   83.55   81.37
  -7   6 -18   62.84   37.41
   7   6 -18   91.53   40.41
  -7  -6 -18   64.32   44.06
  -7   6 -19  267.46  103.03
   7   6 -19  201.41   59.32
  -7  -6 -19  224.35   97.99
  -7   6 -20   10.78   32.26
  -7  -6 -20   41.65   43.07
   7   7   0 1231.39   91.62
  -7   7   0 1368.79   93.39
   7  -7   0 1247.69   77.88
   7   7   1   61.83   39.60
   7  -7  -1   53.89   22.50
  -7   7  -1   27.12   29.63
  -7   7   1   24.47   30.78
   7   7  -1   -1.44   25.78
   7  -7   1   81.06   34.07
   7   7   2  451.41  116.90
   7  -7  -2  431.70   35.49
  -7   7  -2  418.01   54.55
  -7   7   2  377.61   36.82
   7   7  -2  389.65   87.52
   7  -7   2  459.89   89.14
   7   7   3   62.52   38.04
   7  -7  -3   52.70   19.73
  -7   7  -3   30.54   46.36
   7   7  -3   15.61   41.49
   7  -7   3   24.11   24.00
  -7   7   3   47.80   17.00
   7   7   4 2750.93  173.98
  -7   7  -4 2889.10  179.52
   7   7  -4 2561.01  163.45
  -7   7   4 2612.79  151.26
  -7   7  -5   30.37   34.71
   7   7  -5  112.24   39.93
  -7   7   5   59.59   15.77
  -7   7  -6 3416.46  214.88
   7   7  -6 3392.43  211.62
  -7   7   6 3519.56  194.12
  -7   7  -7  142.33   44.11
   7   7  -7  160.61   43.30
  -7   7   7  176.87   18.52
  -7   7  -8 2412.36  114.45
   7   7  -8 2501.48  116.27
  -7   7  -9   83.94   46.43
   7   7  -9  101.63   52.47
  -7   7 -10  357.94  103.90
   7   7 -10  311.94   82.08
  -7   7 -11   53.23   57.06
   7   7 -11   32.10   24.19
  -7  -7 -11   25.46   33.28
  -7   7 -12  412.94  113.11
   7   7 -12  480.69  110.49
  -7  -7 -12  429.27  106.10
  -7   7 -13   47.72   41.41
   7   7 -13  109.38   50.05
  -7  -7 -13   59.99   32.42
  -7   7 -14  110.21   48.37
   7   7 -14  223.09   45.77
  -7  -7 -14  139.27   37.67
  -7   7 -15   39.86   23.42
   7   7 -15   81.51   35.59
  -7  -7 -15   79.30   38.58
  -7   7 -16  837.05   91.23
   7   7 -16  931.17  175.53
  -7  -7 -16  862.65   89.35
  -7   7 -17    3.65   30.30
   7   7 -17   88.43   47.27
  -7   7 -18  457.08  211.29
   7   7 -18  548.40  164.19
  -7  -7 -18  593.23  182.22
  -7   7 -19   50.08   38.58
   7   7 -19   46.12   52.34
  -7  -7 -19    9.32   17.33
  -7   7 -20  185.34   96.71
   7   7 -20  280.08  101.98
  -7  -7 -20  207.22   89.20
   7   8   0   24.10   16.99
  -7   8   0   37.04   20.27
   7  -8   0   15.15   10.13
   7   8   1 3993.59  237.44
  -7   8  -1 4359.20  261.01
   7   8  -1 4531.20  272.79
  -7   8   1 3933.54  261.62
   7   8   2  122.76   38.51
   7  -8  -2  140.13   47.65
  -7   8  -2  195.05   54.43
  -7   8   2  213.96   67.36
   7   8  -2  141.77   34.77
   7  -8   2  175.91   44.32
   7   8   3 1664.18  124.10
   7  -8  -3 1856.88  118.30
  -7   8  -3 2041.73  137.69
  -7   8   3 1799.04  118.68
   7   8  -3 1842.66  130.67
   7   8   4  164.10   45.47
   7  -8  -4  256.98   29.41
  -7   8  -4  215.66   66.68
  -7   8   4  226.07   55.56
   7   8  -4  277.50   70.67
  -7   8  -5   67.28   36.18
   7   8  -5   51.65   37.40
  -7   8   5  101.52   24.55
  -7   8  -6   39.35   32.37
   7   8  -6   -1.15   29.68
  -7   8   6   11.22   10.36
  -7   8  -7  190.91   51.79
   7   8  -7  212.40   60.95
  -7   8   7   50.94   13.83
  -7   8   7   52.55   16.88
  -7   8  -8  411.12  144.19
   7   8  -8  407.74   85.18
  -7   8  -9  131.17   43.83
   7   8  -9  170.82   51.78
  -7   8 -10  705.59  203.44
   7   8 -10  675.86  135.09
  -7   8 -11   63.70   47.82
   7   8 -11  -18.79   27.48
  -7   8 -12  131.71   55.73
   7   8 -12  112.42   44.16
  -7  -8 -12  141.55   40.25
  -7   8 -13  337.76   99.80
   7   8 -13  403.71  136.30
  -7  -8 -13  376.16  116.28
  -7   8 -14  450.85   68.40
   7   8 -14  536.61   92.37
  -7  -8 -14  371.79  114.50
  -7   8 -15  203.25  108.72
   7   8 -15  355.40   80.25
  -7  -8 -15  300.14  115.31
  -7   8 -16   68.62   47.27
   7   8 -16   96.83   58.65
  -7  -8 -16  131.30   58.83
  -7   8 -17  151.64   70.93
   7   8 -17  298.31   99.48
  -7   8 -18   20.78   39.46
  -7  -8 -18   86.34   33.93
  -7   8 -19  119.61   41.31
   7   8 -19   59.21   45.95
  -7  -8 -19   13.18   14.94
   7   9   0 1481.58   97.80
  -7   9   0 1631.27   81.48
   7   9   1   -3.90   29.83
   7  -9  -1   30.14   25.38
  -7   9  -1   13.76   29.48
  -7   9   1   -1.60   21.09
   7   9  -1   55.19   48.32
   7  -9   1   28.75   21.82
   7   9   2  611.42  138.16
   7  -9  -2  433.41  106.31
  -7   9  -2  614.72  151.69
  -7   9   2  501.78  129.81
   7   9  -2  452.10   53.43
   7   9   3  355.81  109.78
  -7   9  -3  402.00   99.80
   7   9  -3  521.42  160.75
  -7   9   3  421.35   53.37
   7   9   4  256.52   89.09
   7  -9  -4  210.18   69.85
  -7   9  -4  264.52   62.18
  -7   9   4  365.23   35.98
   7   9  -4  220.09   72.96
   7   9   5  844.60   97.81
  -7   9  -5  740.20  175.31
   7   9  -5  760.79  195.14
  -7   9   5  678.20   51.24
  -7   9  -6  785.96  144.53
   7   9  -6  849.43  182.24
  -7   9   6  711.56   57.49
  -7   9  -7   22.86   21.54
   7   9  -7   30.08   41.30
  -7   9   7   12.10    7.83
  -7   9  -8  210.88   81.71
   7   9  -8  185.98   65.62
  -7   9  -9   35.18   27.47
   7   9  -9   14.04   31.29
  -7   9 -10  619.78  171.33
   7   9 -10  694.78  134.55
  -7   9 -11   22.14   21.97
   7   9 -11   78.31   39.19
  -7   9 -12  979.84  143.75
   7   9 -12 1043.49  162.44
  -7   9 -13   83.99   43.61
   7   9 -13   80.48   45.52
  -7  -9 -13   29.32   30.89
  -7   9 -14   10.45   40.57
   7   9 -14  113.22   46.57
  -7  -9 -14   60.79   46.11
  -7   9 -15   36.74   53.45
   7   9 -15   58.52   45.06
  -7  -9 -15   23.26   34.14
  -7   9 -16    0.06   38.81
   7   9 -16   79.94   42.14
  -7  -9 -16   -2.60   32.22
  -7   9 -17   46.05   45.09
   7   9 -17   32.60   32.14
  -7  -9 -17   11.82   18.06
  -7   9 -18  131.06   60.00
  -7  -9 -18   22.57   37.14
   7  10   0   10.70   28.36
  -7  10   0   -1.12   20.97
   7 -10   0   19.59   19.87
   7  10   1   64.74   28.65
   7  10  -1   69.70   43.75
   7  10   2   59.33   25.21
   7 -10  -2   32.99   16.29
  -7  10  -2   32.33   28.39
  -7  10   2   11.57   20.43
   7  10  -2   38.69   40.92
   7  10   3  310.29  103.58
   7 -10  -3  283.51   59.32
  -7  10  -3  366.24   88.67
  -7  10   3  284.35   92.40
   7  10  -3  336.21  122.00
   7  10   4  241.19   81.28
   7 -10  -4  249.92   49.53
  -7  10  -4  205.47   59.84
  -7  10   4  293.19   38.97
   7  10  -4  281.64   83.95
   7  10   5  283.98   83.02
   7 -10  -5  236.57   80.95
  -7  10  -5  404.71  146.45
  -7  10   5  396.21   52.09
   7  10  -5  371.46   87.69
  -7  10  -6    6.23   18.13
   7  10  -6   86.47   41.04
  -7  10   6    2.78    8.53
  -7  10  -7  122.35   70.81
   7  10  -7   98.08   53.67
  -7  10   7   28.80   18.97
  -7  10  -8  356.15  126.17
   7  10  -8  427.91  125.50
  -7  10  -9   93.37   46.99
   7  10  -9   73.39   29.07
  -7  10 -10  290.97  153.68
   7  10 -10  286.67   76.25
  -7  10 -11   36.57   25.77
   7  10 -11  109.62   38.37
  -7  10 -12   -3.50   44.50
   7  10 -12   49.01   36.46
  -7  10 -13  149.36   67.14
   7  10 -13   84.12   49.63
  -7 -10 -13   81.38   37.14
  -7  10 -14  114.01  118.49
   7  10 -14  206.45  115.25
  -7 -10 -14   97.82  118.36
  -7  10 -15  140.38   75.10
   7  10 -15   82.78   52.72
  -7  10 -16  457.23  163.67
   7  10 -16  475.64  165.69
  -7 -10 -16  262.84  176.29
  -7  10 -17  115.50   66.29
   7  10 -17   12.32   29.28
  -7 -10 -17  -14.96   27.42
  -7  10 -18   52.46   49.95
   7  10 -18   55.91   29.04
   7  11   0 1768.80  131.77
  -7  11   0 1871.26  133.63
   7  11   1  380.77  115.55
  -7  11  -1  262.36   93.33
   7 -11  -1  176.22   68.66
   7  11  -1  368.24   82.70
  -7  11   1  226.49   81.87
   7  11   2   30.22   24.10
   7 -11  -2   14.80   12.18
  -7  11  -2   55.08   35.93
  -7  11   2   46.58   23.30
   7  11  -2  107.14   46.36
   7  11   3   42.05   13.84
   7 -11  -3   49.20   31.50
  -7  11  -3   50.88   32.99
  -7  11   3   16.50    9.05
   7  11  -3  144.46   81.14
   7  11   4   11.38   13.40
   7 -11  -4   16.29   12.25
  -7  11  -4   50.97   30.10
  -7  11   4   33.08   22.43
   7  11  -4   30.51   26.46
   7  11   5  362.85  140.65
   7 -11  -5  295.22   46.08
  -7  11  -5  471.04  161.49
  -7  11   5  408.68   45.77
   7  11  -5  334.29   99.92
   7  11   6  296.61   90.66
   7 -11  -6  216.69   29.78
  -7  11  -6  184.89   68.35
  -7  11   6  231.80   53.57
   7  11  -6  243.48   64.40
  -7  11  -7   92.82   55.66
   7  11  -7  107.33   46.60
  -7  11   7   93.67   24.38
  -7  11  -8   61.66   38.64
   7  11  -8   82.01   44.64
  -7  11  -9   23.20   21.68
   7  11  -9   57.53   31.45
  -7  11 -10   14.42   36.92
   7  11 -10  193.80   45.65
  -7  11 -11   14.54   42.29
   7  11 -11   86.32   30.31
  -7  11 -12  693.14   98.25
   7  11 -12  720.67  164.95
  -7  11 -13   53.67   44.23
   7  11 -13   87.00   43.52
  -7  11 -14  319.00   66.66
   7  11 -14  278.80   63.28
  -7 -11 -14  183.46   92.65
  -7  11 -15   54.54   46.77
   7  11 -15   37.16   25.58
  -7 -11 -15   29.20   38.60
  -7  11 -16  111.77   58.24
   7  11 -16  -19.90   35.17
  -7 -11 -16   -6.91   26.18
  -7  11 -17  142.37   70.02
   7  12   0   41.27   32.46
  -7  12   0   29.82   23.38
  -7  12  -1 1249.06   99.91
   7  12   1 1139.17   95.52
  -7  12   1 1426.75   93.62
   7  12  -1 1101.19   93.27
   7  12   2  373.01  157.44
  -7  12  -2  366.43   52.52
   7  12  -2  552.66  128.36
  -7  12   2  382.10   96.50
   7  12   3  229.57   88.93
   7 -12  -3   75.57   44.21
  -7  12  -3  236.37   57.31
  -7  12   3  216.89   49.67
   7  12  -3  263.98   89.58
   7  12   4  413.61  165.94
   7 -12  -4  554.59   80.48
  -7  12  -4  601.63   79.62
  -7  12   4  695.88   68.70
   7  12  -4  850.94  245.99
   7  12   5   69.65   32.93
  -7  12  -5  116.73   53.89
   7  12  -5  143.56   57.12
  -7  12   5   93.53   37.08
   7  12   6   33.66   39.83
  -7  12  -6    1.85   25.81
   7  12  -6   20.63   31.67
  -7  12   6    3.24   10.67
  -7  12  -7   46.77   26.79
   7  12  -7  203.13   61.41
  -7  12  -8  141.79   60.56
   7  12  -8  226.53   48.56
  -7  12  -9   94.51   54.50
   7  12  -9  162.87   38.91
  -7  12 -10  397.74  148.89
   7  12 -10  343.50   86.89
  -7  12 -11   63.39   42.60
   7  12 -11   42.79   39.98
  -7  12 -12  118.89   71.64
   7  12 -12  227.63   72.31
  -7  12 -13   85.18   57.14
   7  12 -13   46.91   39.75
  -7  12 -14   78.48   70.11
   7  12 -14   17.62   25.68
  -7 -12 -14   53.13   32.83
  -7  12 -15  231.67   91.09
   7  12 -15   61.32   36.83
  -7 -12 -15   98.30   56.80
   7  13   0  199.86   60.97
  -7  13   0   71.83   32.38
   7  13   1  126.81   57.43
  -7  13  -1   64.55   32.98
   7  13  -1   54.27   49.26
  -7  13   1   77.70   50.09
   7  13   2    3.17   15.11
  -7  13  -2   76.24   47.55
   7  13  -2  144.10   47.65
  -7  13   2   82.86   34.46
   7  13   3  -14.68   30.07
  -7  13  -3   33.06   28.76
   7  13  -3   61.10   32.65
  -7  13   3   10.13   25.93
   7  13   4  806.67  284.36
  -7  13  -4  948.56   95.25
   7  13  -4 1011.76  221.26
  -7  13   4  981.47   95.93
   7  13   5  204.03  107.66
  -7  13  -5  164.75   48.35
   7  13  -5  217.89   70.80
   7  13   6 1531.97  103.29
  -7  13  -6 1597.55  119.33
   7  13  -6 1833.90  353.85
  -7  13  -7   91.22   41.13
   7  13  -7   60.50   34.11
  -7  13  -8 2375.09  151.18
   7  13  -8 2079.16  323.87
  -7  13  -9   31.58   39.96
   7  13  -9  105.99   54.10
  -7  13 -10  372.87   88.16
   7  13 -10  376.72  124.14
  -7  13 -11  113.57   59.61
   7  13 -11  -14.69   42.77
  -7  13 -12   30.20   41.95
   7  13 -12  110.22   42.44
  -7  13 -13  113.22   58.49
   7  13 -13   89.81   37.92
  -7  13 -14  -18.06   49.14
   7  13 -14   38.42   50.56
  -7 -13 -14   12.21   19.47
   7  14   0  108.28   51.98
  -7  14   0   62.29   53.52
   7  14   1  449.05  134.22
  -7  14  -1  345.10  140.37
   7  14  -1  485.94  134.95
  -7  14   1  367.14  148.65
   7  14   2  145.18   85.98
  -7  14  -2  110.20   68.07
   7  14  -2  102.36   61.33
  -7  14   2  176.27   52.05
   7  14   3  380.03  151.40
  -7  14  -3  474.89  200.90
   7  14  -3  629.84  116.29
   7  14   4  175.32   82.17
  -7  14  -4  199.82   76.26
   7  14  -4  218.71   63.98
  -7  14   4  206.09   50.32
   7  14   5  245.27  154.59
  -7  14  -5  239.95   84.72
   7  14  -5  418.74  123.27
   7  14   6   50.29   51.64
  -7  14  -6    6.76   38.22
   7  14  -6   67.89   38.56
  -7  14  -7  175.76   61.50
   7  14  -7  137.30   60.20
  -7  14  -8   40.08   45.90
   7  14  -8  228.01   79.18
  -7  14  -9  146.91   56.89
   7  14  -9  133.22   49.48
  -7  14 -10   50.70   49.17
   7  14 -10   87.24   54.84
  -7  14 -11  259.66   72.80
   7  14 -11  191.80  101.92
   7  14 -12   74.96   37.26
  -7  14 -13  239.74   92.25
   7  14 -13  268.02  103.07
   7  15   0 3738.20  149.88
  -7  15   0 3294.21  318.89
   7  15   1   28.97   31.96
  -7  15  -1   25.98   28.95
   7  15  -1   10.71   34.80
  -7  15   1   12.15   38.86
   7  15   2  923.26  301.99
  -7  15  -2 1408.42  162.41
   7  15  -2 1303.55  145.00
   7  15   3   51.87   28.90
  -7  15  -3   46.93   44.26
   7  15  -3  122.00   87.87
  -7  15   3   84.01   51.87
   7  15   4  216.20   61.34
  -7  15  -4  123.87   67.44
   7  15  -4  270.43   67.92
   7  15   5   22.83   22.24
  -7  15  -5   69.11   52.55
   7  15  -5   16.74   26.03
   7  15   6   72.23   45.17
  -7  15  -6  103.28   71.27
   7  15  -6  143.53   71.09
  -7  15  -7   36.29   48.74
   7  15  -7   21.52   37.70
  -7  15  -8   25.08   28.50
   7  15  -8  102.80   50.60
  -7  15  -9   42.11   34.21
   7  15  -9   24.22   33.69
  -7  15 -10  153.72  149.98
   7  15 -10  316.03  125.10
  -7  15 -11    8.96   47.40
   7  16   0   -4.59   41.75
  -7  16   0   27.75   29.23
  -7  16  -1  118.72   62.60
   7  16  -1   68.50   51.18
  -7  16   1   48.50   32.33
   7  16   2  128.02   63.39
  -7  16  -2  166.08   88.57
  -7  16   2  278.94   82.36
   7  16   3  407.22  129.19
  -7  16  -3  402.03  160.34
   7  16  -3  503.37  171.63
   7  16   4  123.07   83.77
   7  16  -4  199.04   50.24
   7  16   5  101.09  111.80
  -7  16  -5  383.55   76.45
   7  16  -5  192.36   72.57
   7  16   6  -36.27   33.93
  -7  16  -6   30.76   54.55
   7  16  -6   80.78   41.80
  -7  16  -7  152.45   76.23
   7  16  -7  210.16   73.09
  -7  16  -8   56.50   45.51
   7  16  -8   87.47   39.99
   7  17   0   65.39   28.71
  -7  17  -1   12.56   33.52
   7  17  -1  108.06   47.05
   7  17   2  212.45   98.89
  -7  17  -2  332.09  166.89
   7  17   3    9.40   37.71
  -7  17  -3  -20.37   37.59
  -7  17  -4  374.95  103.38
   7  17  -4  275.95  138.62
  -8   0   0  183.00   42.96
  -8   0  -1  -10.22   20.42
  -8   0   1    7.95   14.51
  -8   0   2 2967.81  141.09
  -8   0  -3   12.02   12.49
  -8   0   4 6260.17  347.18
  -8   0  -4 5643.76  246.96
  -8   0   5   18.00   20.35
  -8   0  -5    9.82   10.80
   8   0  -6 7382.15  252.10
  -8   0   6 7214.96  248.44
  -8   0  -6 6636.06  245.98
   8   0  -7   -9.09   14.16
  -8   0   7   70.04   26.60
  -8   0  -7   31.70   30.36
   8   0  -810019.19  451.57
  -8   0   810144.57  457.85
  -8   0  -8 9719.23  456.74
   8   0  -9   25.64   21.27
  -8   0   9    3.23   14.77
  -8   0  -9   63.67   34.30
   8   0 -10 2161.76   88.42
  -8   0  10 2294.47   88.78
  -8   0 -10 2256.68  104.78
   8   0 -11   51.37   18.02
  -8   0  11   -0.13   11.39
  -8   0 -11   27.71   31.00
  -8   0  12   54.68   20.36
  -8   0 -12   28.29   43.44
  -8   0  13    1.32   15.40
  -8   0 -13  -20.48   32.65
  -8   0  14  669.45   49.39
  -8   0 -14  675.52  138.09
   8   0 -15   29.85   14.96
  -8   0 -15   10.14   38.60
   8   0 -16 1253.79  100.01
  -8   0 -16 1104.68  154.03
   8   0 -17    6.73   12.87
  -8   0 -17   25.07   29.73
  -8   0 -18  533.42  249.67
  -8   0 -19   65.01   41.54
  -8   0 -20  743.55   93.65
  -8   1   0   10.85   14.65
  -8  -1   0   30.16   17.78
  -8   1   0   34.39   28.41
  -8   1  -1 2445.45  128.34
  -8  -1   1 2816.25  154.58
  -8   1   1 2810.71  132.13
  -8  -1  -1 2934.30  214.45
  -8   1  -2 1497.60   86.53
  -8  -1   2 1292.48   76.30
  -8   1   2 1507.47   79.25
  -8  -1  -2 1506.69  109.14
  -8   1  -3 3786.76  177.97
  -8  -1   3 3635.41  173.22
  -8   1   3 3546.56  189.18
  -8  -1  -3 3850.07  174.76
  -8   1  -4 1206.00  129.34
  -8  -1   4 1180.79   66.92
  -8   1   4 1256.71   93.66
   8   1  -4 1333.94  141.36
  -8  -1   5   13.67   15.64
  -8   1  -5   52.50   29.42
   8   1  -5   23.74   13.87
  -8  -1  -5   14.71   19.03
  -8   1  -6   43.06   29.47
  -8  -1   6   29.90   17.56
   8   1  -6   50.06   24.86
  -8  -1  -6    4.04   19.97
  -8   1   6   -2.17   15.34
  -8   1  -7 2895.57  156.46
  -8  -1   7 2751.62  141.57
   8   1  -7 2575.49  149.64
  -8  -1  -7 2773.64  204.43
  -8   1   7 3202.51  157.42
  -8   1  -8  797.12  107.73
  -8  -1   8  703.15   43.02
  -8   1   8  553.75   31.69
   8   1  -8  769.29  131.69
  -8  -1  -8  791.18   70.73
  -8  -1   9 1656.31  105.51
   8  -1  -9 1765.73  109.85
  -8   1  -9 1691.56  178.25
  -8   1   9 1757.15  107.64
   8   1  -9 1646.46  111.22
  -8  -1  -9 1670.26  127.16
   8  -1 -10  230.97   27.02
  -8   1 -10  340.75  120.46
  -8  -1  10  344.99   45.43
  -8   1  10  387.54   97.47
   8   1 -10  309.09   64.55
  -8  -1 -10  239.74   88.61
   8  -1 -11   20.96   23.92
  -8  -1  11   50.39   21.84
  -8   1 -11   27.88   21.34
   8   1 -11   60.14   23.24
  -8   1  11   30.20   20.63
  -8  -1 -11   42.30   40.28
   8  -1 -12  292.47   49.68
  -8   1 -12  363.29  103.09
  -8  -1  12  195.65   73.96
   8   1 -12  322.86   68.54
  -8  -1 -12  270.20   88.93
  -8   1  12  230.97   70.60
   8  -1 -13  344.08  113.27
  -8  -1  13  262.59   39.40
  -8   1 -13  350.63   58.97
   8   1 -13  341.92  102.63
  -8   1  13  140.48   45.41
  -8  -1 -13  374.42   94.49
  -8   1 -14  380.28   97.40
  -8  -1  14  157.79   68.21
  -8   1  14  106.60   62.82
   8   1 -14  231.81   82.71
  -8  -1 -14  217.35   54.51
   8  -1 -15  825.21   63.66
  -8   1 -15  790.79  243.38
   8   1 -15  800.66  139.83
  -8  -1 -15  771.12  142.57
  -8   1 -16  929.12  278.18
   8   1 -16  988.18  153.08
  -8  -1 -16 1090.82  212.38
  -8   1 -17   65.32   23.81
  -8  -1 -17   86.44   48.22
  -8   1 -18  123.63   60.00
  -8  -1 -18   74.90   52.73
  -8   1 -19    1.32   36.65
  -8  -1 -19   24.44   28.89
  -8   1 -20   45.77   35.19
  -8  -1 -20   56.70   36.47
  -8   1 -21  101.92   66.39
  -8  -1 -21   75.32   75.16
  -8  -2   011008.79  477.88
  -8   2   012211.17  498.92
  -8   2  -1  466.59   52.02
  -8  -2   1  396.17   55.41
  -8   2   1  458.47  120.27
  -8  -2  -1  300.56   76.70
  -8   2  -2 4862.27  224.37
  -8  -2   2 4370.20  205.36
  -8  -2  -2 4476.66  203.73
  -8   2   2 4794.46  207.26
  -8   2   2 4716.54  203.98
  -8  -2   3  503.33   69.47
  -8   2  -3  566.52  118.96
  -8  -2  -3  456.92  119.75
   8   2  -3  542.42   45.54
  -8   2   3  515.52   50.92
  -8  -2   4  439.17  128.11
  -8   2  -4  487.95  131.53
  -8   2   4  468.74   69.36
  -8  -2  -4  321.91  122.52
   8   2  -4  516.60   55.73
  -8  -2   5  659.56  112.89
  -8   2  -5  680.33   63.59
  -8   2   5  646.94   48.60
   8   2  -5  844.86  125.40
  -8  -2  -5  639.18   82.15
  -8   2  -6  633.49  171.74
  -8  -2   6  676.78   52.88
  -8   2   6  649.92   42.23
   8   2  -6  662.62  141.38
  -8  -2  -6  785.10  188.87
  -8   2  -7   39.25   25.79
  -8  -2   7   72.45   26.07
  -8   2   7   40.50   15.64
   8   2  -7   66.72   30.23
  -8  -2  -7   79.16   38.29
  -8   2  -8   31.31   19.25
   8   2  -8   23.39   26.85
  -8   2   8   29.08   16.67
  -8  -2  -8   50.55   29.39
  -8   2  -9   48.94   34.15
  -8  -2   9   -2.03   15.93
  -8   2   9   -3.47   10.15
   8   2  -9   16.37   21.40
  -8  -2  -9   28.36   21.76
  -8   2 -10 3165.72  132.67
  -8  -2  10 3166.63  117.61
  -8   2  10 3153.16  101.97
   8   2 -10 2857.31  113.33
  -8  -2 -10 3382.23  356.09
  -8   2 -11  960.81  196.45
  -8  -2  11 1031.18   74.26
  -8   2  11  977.14   64.46
   8   2 -11 1128.45  157.38
  -8  -2 -11 1115.84  172.69
  -8   2 -12 1751.25  145.16
  -8  -2  12 1785.56   91.72
  -8   2  12 1924.70   78.52
   8   2 -12 1718.78  239.45
  -8  -2 -12 2159.32  119.30
  -8   2 -13   21.98   16.14
  -8   2  13    6.75    7.33
  -8  -2 -13   38.05   22.13
  -8   2 -14 1900.68  148.42
   8   2 -14 2220.09  228.81
  -8  -2 -14 2143.17  132.63
  -8   2 -15   34.52   27.35
   8   2 -15   47.75   27.24
  -8  -2 -15   33.93   15.31
  -8   2 -16  173.84   47.91
   8   2 -16  215.59   61.84
  -8  -2 -16  160.07   59.66
  -8   2 -17   19.42   23.48
   8   2 -17   -2.21   16.72
  -8  -2 -17   28.04   23.78
  -8   2 -18  114.88   49.40
   8   2 -18  168.04   84.56
  -8  -2 -18  246.71   63.14
  -8   2 -19   50.50   32.00
  -8  -2 -19   69.08   40.41
  -8   2 -20   48.23   40.31
  -8  -2 -20   42.88   18.16
  -8   2 -21   55.37   24.64
  -8  -3   0   40.73   28.21
  -8   3   0  -10.39   21.57
  -8   3  -1 2395.82  129.28
  -8  -3   1 2336.33  120.53
   8   3  -1 2596.68  131.47
  -8   3   1 2417.60  116.75
  -8  -3  -1 2236.94  134.15
  -8   3  -2  910.95   65.34
  -8  -3   2  884.33  174.10
   8   3  -2  812.00   65.45
  -8   3   2 1015.42   65.43
  -8  -3  -2  913.43  167.33
  -8   3  -3  836.69  154.47
  -8  -3   3  724.36  144.43
   8   3  -3  648.92  123.38
  -8   3   3  753.33   91.26
  -8   3   3  659.45   81.09
  -8   3  -4  572.51   94.46
  -8  -3   4  404.31  101.74
  -8   3   4  484.54   40.42
   8   3  -4  490.22  128.37
  -8   3   4  433.13   48.27
  -8   3  -5  202.85   74.77
  -8  -3   5  174.10   25.23
  -8   3   5  177.30   40.75
   8   3  -5  145.58   71.23
  -8   3   5  196.59   35.79
  -8   3  -6  365.91   94.99
  -8  -3   6  246.45   40.37
  -8   3   6  304.57   49.01
   8   3  -6  316.30   79.54
  -8   3   6  262.33   42.44
  -8   3  -7  205.57   50.03
  -8  -3   7  191.84   39.06
  -8   3   7  108.72   32.56
   8   3  -7  150.59   37.28
  -8   3   7  187.52   56.56
  -8  -3  -7  187.37   32.06
  -8   3  -8  679.50   91.15
  -8  -3   8  370.06  112.19
  -8   3   8  538.92   34.72
   8   3  -8  489.46   55.90
  -8  -3  -8  614.14  166.07
  -8   3   8  521.05   29.38
  -8   3  -9  242.28   92.80
  -8  -3   9  264.52   41.02
  -8   3   9  238.89   26.02
   8   3  -9  229.00   60.82
  -8  -3  -9  218.32   47.85
  -8   3 -10 1496.37  232.53
  -8  -3  10 1243.38   71.77
  -8   3  10 1314.77   47.99
   8   3 -10 1516.59  142.74
  -8  -3 -10 1352.47   92.18
  -8   3 -11   19.71   34.62
  -8  -3  11   23.83   18.37
  -8   3  11   24.25    9.96
   8   3 -11   88.32   36.89
  -8  -3 -11   17.97   26.73
  -8   3 -12  697.12  111.06
   8   3 -12  717.57  169.18
  -8   3  12  701.07   34.31
  -8  -3 -12  795.79  133.20
  -8   3 -13  375.56  101.34
  -8   3  13  362.45   40.94
  -8  -3 -13  371.45   53.56
  -8   3 -14  269.38   82.99
   8   3 -14  306.34   84.09
  -8  -3 -14  172.67   84.58
  -8   3 -15  340.11   77.16
   8   3 -15  247.10   68.42
  -8  -3 -15  364.50   48.18
  -8   3 -16  185.82  110.24
   8   3 -16  480.78   79.52
  -8  -3 -16  256.64   96.62
  -8   3 -17  189.81  109.94
   8   3 -17  193.75   76.58
  -8  -3 -17  130.55   88.01
  -8   3 -18  157.00   56.75
   8   3 -18   28.31   22.49
  -8  -3 -18   85.44   41.76
  -8   3 -19   53.02   44.37
  -8  -3 -19   10.73   20.14
  -8   3 -20   37.08   24.39
  -8  -3 -20  112.62   51.81
  -8   3 -21   64.19   50.71
  -8  -3 -21   63.99   35.33
   8   4   0 3063.71  128.53
  -8  -4   0 2956.53  125.38
  -8   4   0 2785.54  127.65
  -8   4  -1   17.39   19.68
  -8  -4   1   -7.92   18.09
   8   4  -1   40.93   18.98
  -8   4   1   64.18   21.01
  -8  -4  -1   15.02   16.93
  -8   4  -2  616.91   48.75
  -8  -4   2  548.98  116.61
   8   4  -2  785.43  108.94
  -8   4   2  688.26   47.75
  -8  -4  -2  558.19  147.66
  -8   4  -3  546.31  149.98
  -8  -4   3  363.84   71.25
   8   4  -3  519.27  117.61
  -8   4   3  518.83   48.11
  -8  -4  -3  461.17   88.34
  -8   4  -4 1181.11   72.14
  -8  -4   4 1011.71   73.42
   8   4  -4 1118.68  174.83
  -8   4   4 1099.84   52.65
  -8   4   4 1019.14   83.72
  -8  -4   5  181.18   31.57
  -8   4  -5  171.30   52.34
   8   4  -5  135.92   63.84
  -8   4   5  136.43   41.75
  -8   4  -6 2340.88  136.26
  -8  -4   6 2047.52  120.27
  -8   4   6 2191.81  108.85
   8   4  -6 2122.14  121.13
  -8   4   6 2174.20  112.41
  -8   4  -7  143.81   42.43
  -8  -4   7  125.40   45.14
  -8   4   7   90.07   30.14
   8   4  -7  119.11   31.75
  -8   4   7   93.92   24.81
  -8   4  -8 1767.57  128.75
   8   4  -8 1805.38  155.94
  -8   4   8 1706.78  100.66
  -8   4   8 1684.27   98.48
  -8   4  -9   28.92   27.66
   8   4  -9    6.58   19.06
  -8   4   9   26.08   13.15
  -8   4   9   19.00   10.97
  -8  -4  -9   25.24   28.82
  -8   4 -10  523.52  135.71
   8   4 -10  443.70  115.29
  -8   4  10  404.84   20.09
  -8   4  10  413.47   17.09
  -8  -4 -10  472.32  144.45
  -8   4 -11  257.37   85.65
   8   4 -11  181.43   36.99
  -8   4  11  207.68   19.91
  -8  -4 -11  275.86   89.73
  -8   4 -12  108.92   71.59
   8   4 -12   45.18   26.70
  -8  -4 -12   75.88   29.65
  -8   4 -13   48.48   42.26
   8   4 -13   21.14   24.68
  -8  -4 -13   40.26   20.78
  -8   4 -14   31.41   30.86
   8   4 -14   63.51   24.97
  -8  -4 -14   19.81   26.17
  -8   4 -15  207.41   62.12
   8   4 -15  195.63   55.41
  -8  -4 -15  159.66   67.80
  -8   4 -16   36.93   42.36
   8   4 -16   73.34   28.16
  -8  -4 -16   49.20   33.86
  -8   4 -17   76.86   44.68
   8   4 -17   92.05   48.44
  -8  -4 -17   36.21   41.84
  -8   4 -18  239.76  137.93
  -8  -4 -18  298.30   58.92
  -8   4 -19   35.25   32.50
   8   4 -19    7.12   17.85
  -8  -4 -19   24.58   28.11
  -8   4 -20  214.25   91.80
   8   4 -20  203.76   59.19
  -8  -4 -20  188.87  137.26
   8   5   0   22.86   16.46
  -8   5   0   26.80   27.84
  -8   5  -1  499.13   71.24
   8   5   1  485.14  150.77
  -8   5   1  443.51   98.44
   8   5  -1  532.48  120.17
  -8   5  -2  786.39   57.90
   8   5  -2  721.91   61.06
  -8   5   2  921.60   65.09
   8  -5   2  856.66   61.24
  -8   5  -3   82.40   29.47
   8   5  -3   24.71   21.40
  -8   5   3   61.06   25.00
  -8   5  -4 2953.56  163.95
   8   5  -4 2872.12  157.54
  -8   5   4 2766.35  137.61
  -8   5  -5   92.25   36.05
  -8   5   5   35.43   15.82
   8   5  -5    3.13   18.45
  -8   5   5   31.81   21.02
  -8   5  -6   62.90   17.27
   8   5  -6   50.66   26.27
  -8   5   6   44.19   12.48
  -8   5  -7   56.10   31.60
  -8   5   7   46.26   12.79
   8   5  -7   67.81   39.12
  -8   5   7   39.97   16.10
  -8   5  -8  177.49   44.39
  -8   5   8   73.93   26.99
  -8   5   8   83.08   31.53
   8   5  -8  110.33   32.39
  -8   5  -9   18.90   20.37
   8   5  -9    3.58   22.88
  -8   5   9   13.82    6.03
  -8   5 -10 1498.73  108.84
   8   5 -10 2105.42  250.22
  -8  -5 -10 1545.23  171.46
  -8   5 -11   49.79   26.29
   8   5 -11   27.37   19.20
  -8  -5 -11   85.04   43.76
  -8   5 -12  241.43   75.97
   8   5 -12  228.64   72.27
  -8  -5 -12  182.28   46.38
  -8   5 -13   88.51   44.54
   8   5 -13   41.87   36.16
  -8  -5 -13    5.01   17.47
  -8   5 -14   91.99   36.60
   8   5 -14   62.75   35.54
  -8  -5 -14   55.61   30.57
  -8   5 -15   75.28   47.37
   8   5 -15   30.68   27.87
  -8  -5 -15   58.44   32.10
  -8   5 -16  402.04  133.14
   8   5 -16  324.88  122.10
  -8  -5 -16  328.77   88.97
  -8   5 -17   21.96   28.63
   8   5 -17    5.83   19.08
  -8  -5 -17    9.09   30.86
  -8   5 -18  -19.25   36.62
  -8  -5 -18   26.35   38.99
  -8   5 -19   81.12   37.87
   8   5 -19   35.53   18.05
  -8  -5 -19   59.00   34.21
  -8   5 -20   50.76   16.28
   8   5 -20   55.50   25.24
  -8  -5 -20   58.73   31.45
   8   6   0 8445.67  404.71
  -8   6   0 9138.60  427.04
   8  -6   0 9059.50  413.24
   8   6   1   17.33   17.44
  -8   6  -1   41.76   28.46
   8   6  -1   70.24   44.07
  -8   6   1   23.32   18.50
   8  -6   1    9.63   25.87
   8   6   2  769.11  137.42
  -8   6  -2  923.07  190.18
   8   6  -2  706.66   53.43
  -8   6   2  765.90   43.88
   8  -6   2  666.69  152.99
  -8   6  -3   40.67   22.25
   8   6  -3   80.66   39.76
  -8   6   3   91.21   29.92
   8  -6   3   29.53   32.11
  -8   6  -4 1391.55  100.70
   8   6  -4 1255.13   90.54
  -8   6   4 1462.77   93.86
  -8   6  -5  265.87   86.99
   8   6  -5  155.97   57.77
  -8   6   5  252.10   53.80
  -8   6  -6 2594.26  173.76
  -8   6   6 2590.58  147.47
   8   6  -6 2622.95  191.40
  -8   6   6 2666.36  151.29
  -8   6  -7  220.09   44.77
   8   6  -7  253.33   75.39
  -8   6   7  214.34   28.40
  -8   6   7  256.35   55.80
  -8   6  -8 2289.12  169.83
   8   6  -8 2312.61  157.05
  -8   6  -9   18.40   16.16
   8   6  -9   41.60   41.92
  -8   6 -10  686.65  149.92
   8   6 -10  652.13  133.41
  -8  -6 -10  547.37   64.66
  -8   6 -11   39.99   47.14
   8   6 -11   38.57   21.27
  -8  -6 -11   45.93   36.92
  -8   6 -12  142.35   66.73
   8   6 -12  188.43   56.57
  -8  -6 -12  103.86   63.43
  -8   6 -13   39.94   21.74
   8   6 -13  128.83   53.42
  -8  -6 -13   64.31   36.45
  -8   6 -14  137.78   54.48
   8   6 -14  251.48   59.06
  -8  -6 -14  173.95   71.66
  -8   6 -15   49.61   30.22
   8   6 -15   81.27   45.46
  -8  -6 -15   35.14   36.87
  -8   6 -16   11.52   42.00
   8   6 -16  -18.86   28.81
  -8  -6 -16   58.07   27.56
  -8   6 -17   47.36   36.34
   8   6 -17   48.49   47.10
  -8  -6 -17   10.79   25.36
  -8   6 -18  142.00   85.09
   8   6 -18   69.16   37.00
  -8  -6 -18   35.15   32.92
  -8   6 -19   34.88   33.23
   8   6 -19   63.29   33.08
  -8  -6 -19   41.81   32.68
  -8   6 -20   61.44   73.48
  -8  -6 -20   85.42   43.31
   8   7   0   10.77   24.24
  -8   7   0   48.69   26.55
   8  -7   0  -11.64   18.17
   8   7   1 3879.58  237.75
   8  -7  -1 3973.61  228.63
  -8   7  -1 3873.30  228.36
  -8   7   1 3853.44  224.02
   8   7  -1 3742.08  244.85
   8   7   2   47.64   24.73
  -8   7  -2   46.45   19.80
   8   7  -2   12.13   33.67
  -8   7   2   55.17   18.77
   8  -7   2   24.10   16.59
   8   7   3 1154.81   93.33
  -8   7  -3 1250.33  128.80
   8   7  -3 1393.67  113.74
  -8   7   3 1302.07   92.99
  -8   7  -4  537.04   67.99
   8   7  -4  616.77  118.04
  -8   7   4  466.92  113.05
   8   7  -5   42.43   42.29
  -8   7   5   80.12   27.64
  -8   7  -6   95.07   31.17
   8   7  -6  133.24   45.77
  -8   7   6  132.48   37.23
  -8   7   6   68.77   28.42
   8   7  -7   82.60   52.96
  -8   7   7    0.58    4.81
  -8   7  -8  354.76  111.15
   8   7  -8  332.30   90.34
  -8   7  -9   91.85   36.82
   8   7  -9   27.51   39.35
  -8   7 -10  354.50   71.20
   8   7 -10  464.99  116.62
  -8   7 -11   81.48   52.13
   8   7 -11   72.87   29.27
  -8  -7 -11   37.74   31.33
  -8   7 -12   18.05   37.15
   8   7 -12   -0.12   25.75
  -8  -7 -12   26.58   29.85
  -8   7 -13  362.20  129.61
   8   7 -13  528.06   86.22
  -8  -7 -13  375.47   80.51
  -8   7 -14  550.31  228.77
   8   7 -14  765.40  156.09
  -8  -7 -14  738.81   83.64
  -8   7 -15  442.43  158.41
   8   7 -15  402.06  106.74
  -8  -7 -15  228.51  154.73
  -8   7 -16  249.04  132.43
   8   7 -16  389.47   88.40
  -8  -7 -16  373.54   83.69
  -8   7 -17  150.84   79.84
   8   7 -17  108.34   63.06
  -8  -7 -17  104.94   55.58
  -8   7 -18   28.44   44.18
   8   7 -18   71.91   41.87
  -8  -7 -18   35.52   23.49
  -8   7 -19   -5.37   39.12
   8   7 -19   19.26   32.45
  -8  -7 -19   70.74   49.03
   8   8   0   83.38   43.59
   8   8   1   41.54   23.50
   8  -8  -1    8.21   23.43
  -8   8  -1   31.15   22.50
  -8   8   1   25.07   21.99
   8   8  -1   47.10   28.00
   8  -8   1   12.95   16.13
   8   8   2  835.62  210.06
   8  -8  -2  859.06   53.52
  -8   8  -2  961.61  215.82
  -8   8   2  911.35   54.55
   8   8  -2  890.63  168.89
   8   8   3  213.54   83.16
  -8   8  -3  308.82  107.84
   8   8  -3  217.94   97.21
  -8   8   3  310.87  101.17
  -8   8  -4   -5.57   29.60
   8   8  -4   93.20   54.38
  -8   8   4   13.72   17.38
  -8   8  -5  160.93   63.85
   8   8  -5  125.38   40.78
  -8   8   5  140.87   35.37
  -8   8  -6 1502.40  177.69
   8   8  -6 1736.08  129.26
  -8   8   6 1724.88  101.05
  -8   8  -7  197.98   49.94
   8   8  -7   20.73   36.21
  -8   8   7   84.21   20.77
  -8   8   7   56.41   26.25
  -8   8  -8  731.55   92.15
   8   8  -8  934.38  126.91
  -8   8  -9   43.10   26.69
   8   8  -9   17.32   33.92
  -8   8 -10 2511.12  181.76
   8   8 -10 2323.38  154.60
  -8   8 -11   21.31   33.53
   8   8 -11   80.79   48.02
  -8   8 -12 1683.79  134.23
   8   8 -12 1768.10  136.86
  -8  -8 -12 1647.59  137.08
  -8   8 -13   -2.19   37.52
   8   8 -13   37.43   36.36
  -8  -8 -13   41.48   22.25
  -8   8 -14  220.51  126.35
   8   8 -14  203.64   58.97
  -8  -8 -14  267.86   56.63
  -8   8 -15   39.44   37.01
   8   8 -15   67.31   46.34
  -8  -8 -15   27.09   34.57
  -8   8 -16    4.88   43.27
   8   8 -16   84.01   42.20
  -8  -8 -16   22.36   29.61
  -8   8 -17   80.28   55.68
   8   8 -17   51.06   29.00
  -8  -8 -17   -8.32   30.36
  -8   8 -18   62.63   60.14
   8   8 -18    6.61   36.59
   8   9   0   43.49   25.42
  -8   9   0   44.23   22.50
   8  -9   0   21.85   10.01
   8   9   1 2405.72  184.71
  -8   9  -1 2345.03  153.75
   8  -9  -1 2369.97  138.79
   8   9  -1 2319.67  163.03
   8   9   2  455.79  155.92
   8  -9  -2  484.47   48.23
  -8   9  -2  424.33  166.82
  -8   9   2  475.90  143.33
   8   9  -2  540.88   85.59
   8   9   3  251.51   62.48
   8  -9  -3  175.77   26.48
  -8   9  -3  216.51   70.09
  -8   9   3  213.16   77.88
   8   9  -3  330.76   71.39
   8   9   4   87.12   39.23
  -8   9  -4   37.34   36.42
   8   9  -4   74.70   51.72
  -8   9   4   24.84   22.62
  -8   9  -5  576.76  125.68
   8   9  -5  783.60  142.58
  -8   9   5  633.77   54.12
  -8   9  -6  417.66  104.68
   8   9  -6  355.51   92.49
  -8   9   6  405.58   33.83
  -8   9  -7  644.54  210.23
   8   9  -7  761.79  166.00
  -8   9   7  627.08   43.73
  -8   9   7  603.97   42.04
  -8   9  -8   29.95   37.20
   8   9  -8   59.40   30.04
  -8   9  -9  317.36  105.39
   8   9  -9  199.43   57.01
  -8   9 -10  118.39   54.09
   8   9 -10  198.79   58.36
  -8   9 -11  289.01  105.35
   8   9 -11  222.17   87.88
  -8   9 -12   17.63   41.70
   8   9 -12  122.75   56.00
  -8   9 -13  316.34  145.13
   8   9 -13  414.73  103.48
  -8  -9 -13  439.95  120.48
  -8   9 -14  102.60   53.55
   8   9 -14  271.21  101.82
  -8  -9 -14   75.06   37.29
  -8   9 -15  237.47   82.48
   8   9 -15  442.13  121.38
  -8  -9 -15  243.48  103.99
  -8   9 -16  180.12   89.23
   8   9 -16  326.04   96.96
  -8  -9 -16  142.59   72.82
  -8   9 -17  249.83  121.21
   8   9 -17  217.00   64.99
  -8  -9 -17  138.68  140.84
  -8   9 -18   52.53   61.63
   8   9 -18  154.42   64.26
   8  10   0   16.84   25.65
  -8  10   0   83.86   50.21
   8  10   1  502.82  116.24
   8 -10  -1  562.80   81.27
  -8  10  -1  616.25  117.53
  -8  10   1  572.75   46.49
   8  10  -1  570.22   99.26
   8  10   2  316.87   92.54
  -8  10  -2  271.21  100.18
   8  10  -2  534.91  103.72
  -8  10   2  502.55  145.03
   8  10   3   58.96   19.32
   8 -10  -3   19.43   13.79
  -8  10  -3   51.46   42.50
  -8  10   3   20.32   18.01
   8  10  -3   86.82   52.13
   8  10   4  947.60   86.13
   8 -10  -4 1029.21   75.31
  -8  10  -4 1038.97  189.19
  -8  10   4 1102.04   80.23
   8  10  -4 1226.15  216.49
  -8  10  -5  100.33   41.88
   8  10  -5  110.13   95.72
  -8  10   5   98.31   36.44
  -8  10  -6 3716.03  204.04
   8  10  -6 3945.07  145.09
  -8  10   6 3914.20   85.18
  -8  10  -7   34.92   55.61
   8  10  -7  112.57   60.68
  -8  10   7   -0.88    7.11
  -8  10  -8 2164.34  158.10
   8  10  -8 2183.64  173.95
  -8  10  -9   42.12   20.28
   8  10  -9   24.82   38.72
  -8  10 -10  636.56  216.09
   8  10 -10  914.19  243.31
  -8  10 -11   80.77   41.32
   8  10 -11  111.75   60.92
  -8  10 -12   72.16   39.70
   8  10 -12  121.22   35.26
  -8  10 -13   61.57   28.35
   8  10 -13   46.78   38.87
  -8 -10 -13   30.71   33.81
  -8  10 -14  157.42  101.05
   8  10 -14  165.78   80.65
  -8 -10 -14   83.88   33.38
  -8  10 -15   52.18   24.26
  -8 -10 -15   48.31   32.88
  -8  10 -16  548.39   62.32
   8  10 -16  496.43  170.34
  -8 -10 -16  284.06  189.75
  -8  10 -17   61.33   36.21
   8  10 -17    9.29   26.32
  -8 -10 -17   55.23   37.64
   8  11   0   49.21   34.04
  -8  11   0   -3.40   23.46
   8  11   1  441.35  115.64
  -8  11  -1  469.96   60.91
   8  11  -1  527.48  159.25
  -8  11   1  429.25  136.94
   8  11   2  590.28  161.10
   8 -11  -2  382.91   98.47
  -8  11  -2  601.63   72.48
  -8  11   2  714.82   69.93
   8  11  -2  668.24  252.11
   8  11   3  207.09   69.05
  -8  11  -3  154.98   78.19
   8  11  -3  148.90   52.10
  -8  11   3  257.85   40.26
   8  11   4   63.22   55.62
   8 -11  -4   50.91   28.58
  -8  11  -4   24.22   28.36
  -8  11   4   16.90   21.99
   8  11  -4  136.53   58.14
   8  11   5  595.43  226.33
  -8  11  -5  719.77   73.77
   8  11  -5  852.19  230.50
  -8  11  -6   14.44   35.26
   8  11  -6   14.96   40.25
  -8  11   6   -0.34    9.00
  -8  11  -7  823.50   87.75
   8  11  -7  701.24  219.60
  -8  11  -8  152.27   56.10
   8  11  -8  178.97   41.69
  -8  11  -9  417.02  220.85
   8  11  -9  754.32  181.97
  -8  11 -10  606.85   72.97
   8  11 -10  643.04  126.99
  -8  11 -11  141.07   61.58
   8  11 -11  199.21   71.76
  -8  11 -12   19.88   35.99
   8  11 -12   -6.94   35.96
  -8  11 -13   77.04   66.74
   8  11 -13  239.76   74.06
  -8  11 -14   61.51   46.47
   8  11 -14  218.31   83.25
  -8 -11 -14  139.72   68.80
  -8  11 -15  279.10   69.19
   8  11 -15  231.95   75.84
  -8 -11 -15  106.57   60.13
  -8  11 -16   89.00   42.43
   8  11 -16  215.56   74.47
  -8 -11 -16  181.03  114.00
   8  12   0 3302.83  181.63
  -8  12   0 3278.77  212.42
   8  12   1   47.71   46.72
  -8  12  -1   76.67   31.56
   8  12  -1   64.78   29.46
  -8  12   1   -7.07   21.96
   8  12   2 2237.54  161.94
  -8  12  -2 2366.19  192.98
   8  12  -2 2366.68  169.55
  -8  12   2 2429.22  161.36
   8  12   3   75.26   58.39
  -8  12  -3   70.10   37.45
  -8  12   3   60.53   31.25
   8  12   4  295.18  180.78
  -8  12  -4  394.55   61.19
   8  12  -4  574.54  140.28
  -8  12   4  431.08   97.17
   8  12   5  357.47  142.50
  -8  12  -5  469.82   67.49
   8  12  -5  508.37  112.13
  -8  12   5  493.30   43.92
  -8  12  -6   66.04   50.03
   8  12  -6   79.52   40.00
  -8  12   6   33.18   23.64
  -8  12  -7   92.91   57.11
   8  12  -7   49.98   42.66
  -8  12  -8  270.84   66.46
   8  12  -8  137.64   56.78
  -8  12  -9   66.95   54.64
   8  12  -9   96.79   38.29
  -8  12 -10  760.30   81.92
   8  12 -10 1052.79  249.05
  -8  12 -11   88.18   54.44
   8  12 -11   30.98   30.44
  -8  12 -12 1071.67   99.41
   8  12 -12  987.77  220.03
  -8  12 -13   -6.81   37.36
   8  12 -13   76.95   24.26
  -8  12 -14  775.44  198.24
   8  12 -14  993.03  284.02
  -8 -12 -14  696.29  271.86
  -8  12 -15  141.95   69.10
   8  12 -15   28.43   17.40
   8  13   0   59.31   44.52
  -8  13   0   24.69   37.67
   8  13   1   80.35   59.35
  -8  13  -1  225.57   66.40
   8  13  -1  194.76   62.76
  -8  13   1   82.31   35.86
   8  13   2  770.36  224.45
  -8  13  -2  873.46   81.28
   8  13  -2  682.07  197.52
  -8  13   2  843.06  172.21
   8  13   3   80.16   41.27
  -8  13  -3  212.12   64.14
   8  13  -3  150.75   63.12
  -8  13   3   53.67   32.88
   8  13   4  749.33   70.99
  -8  13  -4  832.99   88.15
   8  13  -4  728.99  260.80
   8  13   5  198.34   86.60
  -8  13  -5  244.89   52.99
   8  13  -5  183.28   73.06
  -8  13   5  194.03   75.50
  -8  13  -6  213.74   63.95
   8  13  -6  293.62   72.43
  -8  13  -7  143.76   38.29
   8  13  -7  174.17   86.34
  -8  13  -8  117.32   43.08
   8  13  -8  123.34   34.38
  -8  13  -9  174.82   58.04
   8  13  -9   98.08   65.15
  -8  13 -10  773.38  111.48
   8  13 -10  540.74  127.43
  -8  13 -11  228.33   72.55
   8  13 -11  143.12   41.19
  -8  13 -12  236.11   60.37
   8  13 -12  254.03   79.73
  -8  13 -13   84.64   59.17
   8  13 -13   75.13   31.75
   8  14   0  197.15   63.53
  -8  14   0  175.69   41.50
   8  14   1   68.86   35.37
  -8  14  -1   65.14   38.72
   8  14  -1  123.26   34.63
  -8  14   1   63.67   31.70
   8  14   2   46.32   25.90
  -8  14  -2   26.90   21.22
   8  14  -2   -7.98   46.33
  -8  14   2   41.73   36.24
   8  14   3   61.18   36.30
  -8  14  -3   30.41   29.79
   8  14  -3   37.32   27.20
  -8  14   3   90.44   39.95
   8  14   4  273.37  152.75
  -8  14  -4  517.37   77.17
   8  14  -4  318.71  128.18
  -8  14  -5   58.60   37.54
   8  14  -5   14.60   26.37
   8  14   6  706.35  179.44
  -8  14  -6 1053.95  138.04
   8  14  -6  865.11  251.06
  -8  14  -7   44.42   49.58
  -8  14  -8  708.63  200.09
   8  14  -8  860.52  260.85
  -8  14  -9  110.74   58.28
   8  14  -9   33.83   42.11
  -8  14 -10  112.25   62.68
   8  14 -10   82.66   48.24
   8  14 -11   47.88   37.13
  -8  14 -12   16.51   31.30
   8  15   0   97.90   50.60
  -8  15   0   -6.20   28.11
   8  15   1  -10.60   39.34
  -8  15  -1   -2.68   23.51
   8  15  -1   -0.24   38.96
   8  15   2   55.75   30.16
  -8  15  -2  126.76   63.65
   8  15  -2   82.28   64.42
   8  15   3   27.46   23.41
  -8  15  -3   12.06   40.91
   8  15  -3   68.73   61.28
   8  15   4   55.41   39.98
  -8  15  -4   16.29   42.10
   8  15  -4   40.69   38.96
   8  15   5  -17.69   36.98
  -8  15  -5   59.29   55.86
   8  15  -5   45.07   57.34
   8  15   6   63.80   64.68
  -8  15  -6   35.12   53.72
   8  15  -6  136.67   52.61
  -8  15  -7  129.66   61.24
   8  15  -7  105.79   54.41
  -8  15  -8  100.35   51.11
   8  15  -8  138.33   55.51
  -8  15  -9   61.67   59.94
   8  15  -9   84.68   54.58
   8  16   0  285.12  216.04
   8  16   1   81.61   51.70
  -8  16  -1   46.26   34.81
  -8  16   1   16.67   23.73
   8  16   2   53.13   41.51
  -8  16  -2   67.81   43.78
   8  16  -2  125.55   61.80
  -8  16  -3   67.19   50.82
   8  16  -3   59.92   39.94
  -8  16  -4   39.19   40.62
   8  16  -4   90.28   56.93
   8  16   5   48.93   32.81
  -8  16  -5   60.53   58.66
   8  16  -5   69.72   45.84
   8  16   6  192.86  153.29
  -8  16  -6  336.07  180.70
   8  16  -6  299.73  168.38
  -9   0   0   19.27   20.39
  -9   0  -1   12.72   21.38
  -9   0   1   13.35   24.02
  -9   0  -2  220.33   73.53
  -9   0   2  291.92   55.91
  -9   0  -2  195.54   59.60
  -9   0   3   24.07   21.87
  -9   0  -3    6.44   19.46
  -9   0   4   46.17   33.53
  -9   0  -4   53.47   34.45
  -9   0   5   14.86   23.55
  -9   0  -5   35.83   27.97
  -9   0   6   88.60   36.94
  -9   0  -6  138.74   31.89
  -9   0   7  -19.98   13.42
  -9   0  -7   55.21   37.24
   9   0  -8  196.72   71.91
  -9   0  -8  253.37   67.05
   9   0  -9   25.35   16.47
  -9   0   9    0.12   13.43
  -9   0  -9   34.88   26.66
   9   0 -10 1202.41   81.19
  -9   0  10 1412.02   94.77
  -9   0 -10 1140.78   93.49
   9   0 -11   19.60    9.60
  -9   0  11    8.21   16.81
  -9   0 -11   60.60   28.02
   9   0 -12   26.17   27.15
  -9   0  12   59.64   29.35
  -9   0 -12  -11.55   37.96
   9   0 -13   -9.18   15.01
  -9   0  13   -5.48   15.36
  -9   0 -13   37.44   29.45
   9   0 -14  125.54   54.65
  -9   0 -14  111.79   68.31
   9   0 -15   21.17   13.14
  -9   0 -15   65.48   49.11
  -9   0 -16   40.29   21.52
   9   0 -17   -9.08   15.50
  -9   0 -17  123.64   55.37
  -9   0 -18   17.64   29.61
  -9   0 -19   66.89   48.85
  -9   0 -20  -38.19   40.37
  -9  -1   0 4284.54  199.04
  -9   1   0 3988.21  156.50
  -9   1   0 4392.48  169.00
  -9   1  -1  652.83  166.14
  -9  -1   1  779.46   67.69
  -9   1   1  580.21  138.14
  -9  -1  -1  508.87   92.21
  -9   1  -2   81.03   37.16
  -9  -1   2  112.51   20.62
  -9   1   2   60.59   21.58
  -9  -1  -2  104.34   47.07
  -9   1  -3   12.50   37.34
  -9  -1  -3   33.72   14.25
  -9  -1   4  303.09   57.77
  -9   1  -4  504.61  113.11
  -9   1   4  423.51   45.18
  -9  -1  -4  363.67  122.36
  -9  -1   5  153.02   39.46
  -9   1  -5  288.26   98.03
  -9  -1  -5  232.33   57.03
  -9  -1   6 1467.35  123.03
  -9   1  -6 1892.39  113.57
   9   1  -6 1533.01  101.39
  -9   1   6 1640.13   93.60
  -9  -1  -6 1812.33  237.39
  -9   1  -7  319.67   49.00
  -9  -1   7  265.77   32.76
  -9  -1  -7  222.56   32.38
   9   1  -7  237.34   79.31
  -9   1  -8  902.20  295.37
  -9  -1   8  769.28   49.61
  -9   1   8  651.31   45.19
   9   1  -8  723.17   79.88
  -9  -1  -8  680.93   57.87
  -9   1  -9   28.00   28.86
  -9  -1   9   16.48   17.59
  -9   1   9    8.22   12.12
   9   1  -9   12.14   16.62
  -9  -1  -9   31.36   33.82
  -9   1 -10   70.40   31.01
  -9  -1  10  123.60   28.36
  -9   1  10  161.05   26.05
   9   1 -10  148.13   31.48
  -9  -1 -10  222.93   48.96
  -9   1 -11  806.10   89.06
  -9  -1  11  896.61   65.60
  -9   1  11  824.14   98.26
   9   1 -11  994.83  150.49
  -9  -1 -11 1101.18  151.96
  -9   1 -12  415.15  101.47
  -9  -1  12  389.90   47.46
   9   1 -12  503.69   82.19
  -9  -1 -12  424.74  137.60
  -9   1  12  220.65   91.35
   9  -1 -13  102.05   44.26
  -9   1 -13  132.79   49.60
  -9   1  13   47.43   19.03
  -9  -1 -13  130.42   70.29
   9   1 -13   96.74   53.64
   9  -1 -14   26.41   15.58
  -9   1 -14   32.35   15.14
   9   1 -14   37.70   28.07
  -9  -1 -14   83.94   41.72
   9  -1 -15  599.07   60.42
  -9   1 -15  503.41  150.31
  -9  -1 -15  669.37  159.88
   9  -1 -16   16.57   11.56
  -9   1 -16   40.00   38.17
  -9  -1 -16   28.16   28.07
  -9   1 -17   77.09   25.99
  -9  -1 -17   57.42   35.47
  -9   1 -18   99.70   52.11
  -9  -1 -18  156.29   56.84
  -9   1 -19   26.51   35.36
  -9  -1 -19   40.70   24.41
  -9  -1 -20   56.99   32.59
  -9   2   0   15.54   26.82
  -9   2  -1 2492.44  116.43
  -9  -2   1 2297.58  107.49
  -9   2   1 2428.71  102.60
  -9   2   1 2359.41  107.89
  -9  -2  -1 2449.42  113.85
  -9  -2   2  827.50  137.31
  -9   2  -2  891.38   80.46
  -9   2   2  929.67   59.05
  -9  -2   3 1081.24   65.21
  -9   2  -3 1343.22   78.41
  -9   2   3 1340.22  134.98
  -9   2   3 1270.46   63.70
  -9   2  -4  855.19  199.41
  -9  -2   4  682.53   95.17
  -9   2   4  684.43   37.53
   9   2  -4  737.30   95.66
  -9  -2   5  562.26  124.09
  -9   2  -5  555.56  162.44
   9   2  -5  512.69   38.48
  -9   2  -6   20.99   15.66
  -9  -2   6   15.06   18.56
  -9   2   6   -0.53   13.32
   9   2  -6   57.89   22.79
  -9  -2  -6   52.60   24.05
  -9   2  -7 1117.03  137.03
  -9  -2   7  996.48   76.07
  -9   2   7 1005.81   76.64
   9   2  -7 1154.34  152.67
  -9  -2  -7 1019.11   85.81
  -9   2  -8  284.82   81.75
  -9  -2   8  271.43   43.78
  -9   2   8  334.54   36.19
   9   2  -8  249.74   81.71
  -9  -2  -8  379.67   75.19
  -9   2  -9 1786.00   95.33
   9   2  -9 1663.80  165.85
  -9   2   9 1676.69   76.14
  -9  -2  -9 1646.67  121.52
  -9  -2  10  475.89  104.63
  -9   2 -10  530.63  159.16
  -9  -2 -10  463.28  170.32
  -9   2 -11   91.70   46.61
  -9  -2  11   11.53   16.07
  -9   2  11   30.55   12.01
   9   2 -11   11.56   18.71
  -9  -2 -11   88.25   42.22
  -9   2 -12  286.91   53.42
   9   2 -12  334.02   91.84
  -9   2  12  265.21   28.53
  -9  -2 -12  224.86   89.55
  -9   2 -13  711.66  229.39
   9   2 -13  645.87  179.53
  -9  -2 -13  659.83  109.43
  -9   2 -14  309.15  166.20
   9   2 -14  595.34  107.13
  -9  -2 -14  411.73   73.96
  -9   2 -15  272.74   83.17
   9   2 -15  305.95   97.38
  -9  -2 -15  246.46  102.87
  -9   2 -16  930.94   88.34
   9   2 -16  855.25  111.61
  -9  -2 -16 1165.16   97.16
  -9   2 -17  128.58   79.01
   9   2 -17  198.88   78.24
  -9  -2 -17   68.69   31.63
  -9   2 -18  136.70   49.07
  -9  -2 -18  100.48   40.52
  -9   2 -19   55.59   40.67
  -9  -2 -19   80.75   63.03
  -9   2 -20   38.37   34.04
  -9  -2 -20   66.72   41.80
  -9   3   0 6105.47  222.41
  -9  -3   1  225.66   58.49
  -9   3  -1  318.78  109.65
  -9   3   1  247.76   69.97
  -9   3  -2  685.11   49.84
  -9  -3   2  607.32  119.14
   9   3  -2  742.57   57.05
  -9   3   2  683.02   77.84
  -9   3   2  690.61  121.02
  -9   3  -3  143.14   57.12
  -9  -3   3   48.21   30.98
   9   3  -3   58.11   27.26
  -9   3   3   48.40   20.30
  -9   3   3   83.94   29.62
  -9  -3   4    9.25   23.39
  -9   3  -4   61.65   31.95
  -9   3   4  -18.33   14.48
  -9   3   4   36.72   34.11
  -9  -3   5  405.92   46.37
  -9   3  -5  339.36  115.40
  -9   3   5  351.99   82.87
  -9   3   5  447.10  101.12
  -9   3  -6  775.24   62.34
  -9  -3   6  705.04   44.92
  -9   3   6  747.17   67.67
   9   3  -6  700.48   57.24
  -9   3   6  549.25   68.50
  -9   3  -7  102.26   27.64
  -9  -3   7  182.56   42.52
  -9   3   7  124.75   31.87
   9   3  -7  196.91   47.65
  -9   3   7  173.47   46.71
  -9   3  -8   87.38   45.32
   9   3  -8   78.68   35.59
  -9   3   8   41.12   21.41
  -9  -3  -8   87.29   34.79
  -9   3  -9   65.48   21.29
   9   3  -9   62.48   20.40
  -9   3   9   73.58   22.65
  -9  -3  -9   78.11   41.26
  -9   3   9   64.36   18.34
  -9   3 -10  222.23   54.27
   9   3 -10  217.43   55.12
  -9   3  10  132.88   17.31
  -9   3 -11  310.63   86.01
   9   3 -11  279.97   86.96
  -9   3  11  257.46   19.82
  -9  -3 -11  292.36   94.93
  -9   3 -12 1986.50  176.31
   9   3 -12 1840.97  235.64
  -9   3  12 1838.65  109.20
  -9  -3 -12 1860.17  133.53
  -9   3 -13   51.94   48.04
   9   3 -13   91.02   37.03
  -9  -3 -13  113.72   55.58
  -9   3 -14  447.34  176.35
   9   3 -14  380.01  168.24
  -9  -3 -14  582.65  192.15
  -9   3 -15  248.99   74.17
   9   3 -15  166.53   52.19
  -9  -3 -15  160.72   49.82
  -9   3 -16   -4.14   41.67
   9   3 -16   70.76   40.54
  -9  -3 -16   73.00   47.13
  -9   3 -17   54.59   45.72
   9   3 -17   13.85   20.39
  -9  -3 -17  118.19   36.87
  -9   3 -18   64.35   31.23
  -9  -3 -18   48.31   33.74
  -9   3 -19   16.33   22.60
  -9  -3 -19   48.71   27.84
  -9   3 -20    7.84   60.41
  -9   4   0   46.74   27.80
  -9   4  -1 7199.21  337.21
   9   4  -1 6961.29  355.36
  -9   4   1 7469.21  350.26
  -9   4  -2 3510.17  187.07
   9   4  -2 3342.07  179.83
  -9   4   2 3091.18  155.87
  -9   4  -3 3766.55  196.78
  -9   4   3 3934.18  194.08
   9   4  -3 3982.72  212.48
  -9   4   3 4244.79  204.97
  -9   4  -4 1607.39  142.55
   9   4  -4 1833.44  126.10
  -9   4   4 1712.95  107.71
  -9   4   4 1613.91  103.78
  -9   4  -5 2215.69  171.93
  -9   4   5 2255.99  219.56
   9   4  -5 2245.97  182.41
  -9   4   5 2334.01  141.88
  -9   4  -6   90.35   39.93
   9   4  -6  123.41   62.11
  -9   4   6   99.77   38.26
  -9   4   6  146.19   36.25
  -9   4  -7 1788.55   93.90
   9   4  -7 2110.48  169.58
  -9   4   7 1886.78   91.75
  -9   4   7 1888.24   82.49
  -9   4  -8  220.57   98.09
   9   4  -8  107.11   67.37
  -9   4   8  264.39   35.26
  -9   4   8  134.98   52.54
  -9  -4  -8  337.19   73.28
  -9   4  -9 1363.95  171.57
   9   4  -9 1456.55  185.18
  -9   4   9 1459.01   82.28
  -9   4   9 1347.25   76.75
  -9  -4  -9 1520.25  277.83
  -9   4 -10 1508.17  106.97
   9   4 -10 1695.30  107.16
  -9   4  10 1651.76   67.49
  -9  -4 -10 1581.91  134.84
  -9   4  10 1642.02   65.22
  -9   4 -11  958.01  239.81
   9   4 -11  878.64  164.50
  -9   4  11  874.61   53.39
  -9   4  11  859.84   72.92
  -9  -4 -11  914.95  235.41
  -9   4 -12  567.57  237.18
   9   4 -12  569.92  119.89
  -9  -4 -12  484.71  160.31
  -9   4 -13 1989.55  364.13
   9   4 -13 2061.15  229.70
  -9  -4 -13 1753.98  194.33
  -9   4 -14  206.94   83.76
   9   4 -14  215.18   58.46
  -9  -4 -14  142.89   68.35
  -9   4 -15  585.12  263.59
   9   4 -15  738.83  192.15
  -9  -4 -15  721.02  193.99
  -9   4 -16  212.92   80.11
   9   4 -16  222.37   72.91
  -9  -4 -16  217.96   60.87
  -9   4 -17  544.69  209.36
   9   4 -17  840.75  198.29
  -9  -4 -17  778.81  221.94
  -9   4 -18  259.31  102.76
  -9  -4 -18  293.07   60.81
  -9   4 -19   71.12   47.41
   9   4 -19  208.63   52.91
  -9  -4 -19  120.18   51.41
  -9  -4 -20   40.25   46.92
   9   5   0   75.02   40.38
  -9   5   0  131.64   45.74
  -9   5  -1  155.00   60.67
   9   5  -1  156.56   43.05
  -9   5   1  126.44   38.24
  -9   5  -2   58.74   24.57
   9   5  -2   49.86   33.83
  -9   5   2   31.45   26.50
  -9   5  -3  781.15   82.66
   9   5  -3  770.96   63.28
  -9   5   3  778.73   63.92
  -9   5  -4  447.74   72.81
   9   5  -4  388.62  107.21
  -9   5   4  543.33   70.40
  -9   5   4  484.55   60.71
  -9   5  -5   30.72   18.83
   9   5  -5   56.66   38.57
  -9   5   5   18.65   14.71
  -9   5   5   22.21   12.53
  -9   5  -6 1459.32  121.76
   9   5  -6 1440.82  110.08
  -9   5   6 1200.37   74.51
  -9   5  -7   26.48   24.80
   9   5  -7   24.65   25.43
  -9   5   7   22.18   18.23
  -9   5   7   -4.49   11.91
  -9   5  -8 1269.68   97.66
   9   5  -8 1216.65  245.70
  -9   5   8 1146.38   66.71
  -9   5   8 1248.61   72.24
  -9   5  -9   28.86   35.73
   9   5  -9  158.19   65.16
  -9  -5  -9   44.57   36.00
  -9   5 -10   69.49   55.75
   9   5 -10    8.64   20.00
  -9   5  10    5.71    3.60
  -9  -5 -10    7.01   20.03
  -9   5 -11  101.81   60.52
   9   5 -11  182.57   55.42
  -9  -5 -11   44.90   24.99
  -9   5 -12   34.49   41.86
   9   5 -12   44.00   32.95
  -9  -5 -12   40.89   33.87
  -9   5 -13   38.07   34.08
   9   5 -13   -5.89   24.30
  -9  -5 -13   40.30   21.08
  -9   5 -14    7.71   34.50
   9   5 -14   56.32   29.74
  -9  -5 -14   70.97   55.72
  -9   5 -15    7.83   37.68
  -9  -5 -15   32.88   14.88
  -9   5 -16  153.48   58.69
   9   5 -16  135.56   51.59
  -9  -5 -16  136.87   85.04
  -9   5 -17   53.66   23.90
   9   5 -17   12.27   17.36
  -9  -5 -17    0.84   18.61
  -9   5 -18  195.64  125.39
   9   5 -18  148.12   51.17
  -9  -5 -18   79.10   60.15
  -9   5 -19  -48.90   37.65
  -9  -5 -19   43.68   36.40
   9   6   0   36.52   31.16
  -9   6   0   33.42   25.54
   9   6   1 6622.49  376.92
  -9   6  -1 7266.27  408.93
   9   6  -1 7571.82  427.02
  -9   6   1 7176.79  403.68
  -9   6  -2  212.82   62.65
   9   6  -2  114.51   34.04
  -9   6   2  137.76   39.37
  -9   6  -3 3255.38  128.38
   9   6  -3 3741.35  150.79
  -9   6   3 3307.38  116.55
  -9   6  -4  270.36   62.54
   9   6  -4  223.90   52.23
  -9   6   4  219.32   57.52
  -9   6  -5 2934.30  146.82
   9   6  -5 2974.76  248.53
  -9   6   5 2722.91   99.80
  -9   6   5 2920.02  101.46
  -9   6  -6    2.27   23.45
   9   6  -6  131.10   55.09
  -9   6   6   57.96   21.67
  -9   6  -7 2168.63  160.28
   9   6  -7 1985.48  153.94
  -9   6   7 2156.46  119.86
  -9   6   7 1989.09  108.61
  -9   6  -8  257.00   77.71
   9   6  -8  268.64   77.37
  -9   6   8  252.05   48.23
  -9   6   8  221.89   35.39
  -9   6  -9 2026.34  113.77
   9   6  -9 1900.98  213.10
  -9   6   9 1841.82   64.62
  -9   6 -10  319.20   85.62
   9   6 -10  408.28   78.50
  -9  -6 -10  312.34   50.97
  -9   6 -11  515.77  182.78
   9   6 -11  894.45  156.21
  -9  -6 -11  692.68  175.85
  -9   6 -12   95.83   40.26
   9   6 -12  120.81   39.84
  -9  -6 -12   93.25   36.13
  -9   6 -13 1620.66  140.80
   9   6 -13 1622.94  134.61
  -9  -6 -13 1605.22  134.65
  -9   6 -14  181.80   86.15
   9   6 -14  166.38   53.32
  -9  -6 -14   76.83   41.92
  -9   6 -15  606.30  259.34
   9   6 -15 1012.96  178.48
  -9  -6 -15  809.45   94.18
  -9   6 -16  229.49   72.92
   9   6 -16  294.84  105.46
  -9  -6 -16  173.61   62.37
  -9   6 -17  402.94  123.94
  -9  -6 -17  370.87  113.35
  -9   6 -18   34.03   26.85
   9   6 -18   65.54   22.86
  -9  -6 -18   21.62   19.20
  -9   6 -19  204.16  109.00
   9   6 -19  214.50  115.47
   9   7   0 6984.74  146.10
  -9   7   0 6882.45  219.48
  -9   7  -1   23.15   30.73
   9   7   1  -16.76   30.09
  -9   7   1   20.35   17.26
   9   7  -1   26.30   22.56
   9  -7   1   20.76   21.53
   9   7   2   23.78   22.85
  -9   7  -2   41.38   30.14
   9   7  -2   39.19   45.33
  -9   7   2    9.14   23.93
  -9   7  -3  169.28   51.68
   9   7  -3   28.23   33.31
  -9   7   3   57.37   26.32
  -9   7  -4   95.38   53.14
   9   7  -4   75.08   37.60
  -9   7   4   29.05   26.06
  -9   7  -5  471.08  150.97
   9   7  -5  353.39  117.34
  -9   7   5  259.73   83.89
  -9   7  -6   23.05   34.06
   9   7  -6   -1.37   34.14
  -9   7   6   10.35   10.41
  -9   7  -7   52.06   39.56
   9   7  -7   11.52   28.01
  -9   7   7   17.21    8.83
  -9   7  -8  197.89   86.42
  -9   7   8  298.28   33.39
  -9   7   8  231.23   35.02
   9   7  -8  253.32   70.29
  -9   7  -9    6.59   61.25
   9   7  -9   85.11   44.76
  -9   7 -10  135.25   48.70
   9   7 -10  160.56   39.55
  -9   7 -11   97.77   50.58
   9   7 -11   26.07   24.83
  -9  -7 -11  107.06   47.89
  -9   7 -12  879.66   98.31
   9   7 -12 1041.77  159.46
  -9  -7 -12  669.51  184.30
  -9   7 -13   96.71   52.70
   9   7 -13   45.79   31.79
  -9  -7 -13   56.05   38.50
  -9   7 -14   56.09   38.81
   9   7 -14   78.99   32.88
  -9  -7 -14   44.09   58.88
  -9   7 -15   93.00   48.43
   9   7 -15   62.10   39.68
  -9  -7 -15    8.92   42.21
  -9   7 -16   52.51   30.32
   9   7 -16   39.75   38.98
  -9  -7 -16   66.82   31.25
  -9   7 -17    6.49   30.37
   9   7 -17   91.21   49.19
  -9  -7 -17   43.65   25.66
  -9   7 -18   42.96   25.80
   9   7 -18   62.56   30.90
  -9  -7 -18   87.11   38.90
   9   8   0   30.60   24.49
  -9   8   0   20.77   25.73
   9  -8   0    9.52   21.84
   9   8   1 4212.01  237.92
  -9   8  -1 4242.33  235.22
   9   8  -1 3963.62  239.04
  -9   8   1 4403.12  242.89
  -9   8  -2  130.65   47.11
   9   8   2   78.58   39.51
  -9   8   2  140.39   44.94
   9   8  -2  200.41   79.31
   9   8   3   55.78   27.36
  -9   8  -3   49.01   29.18
   9   8  -3   84.81   58.89
  -9   8   3   35.30   25.36
  -9   8  -4   22.83   29.33
   9   8  -4   21.79   23.26
  -9   8   4   20.56   17.38
  -9   8  -5 2015.16  115.84
   9   8  -5 2323.48  316.47
  -9   8   5 1851.15   84.52
  -9   8  -6  268.79   81.85
  -9   8   6  144.54   54.52
   9   8  -6  303.57  103.44
  -9   8   6  181.52   46.69
  -9   8  -7  896.69   85.75
   9   8  -7 1053.70  196.11
  -9   8   7  892.01   57.23
  -9   8  -8  218.48   67.47
   9   8  -8  229.60   55.71
  -9   8  -9  235.80   92.85
   9   8  -9  283.87  114.69
  -9   8 -10  179.21   42.66
   9   8 -10  209.20   49.49
  -9   8 -11  219.64  114.15
   9   8 -11  361.71   65.50
  -9   8 -12   97.44   54.08
   9   8 -12   73.57   44.24
  -9  -8 -12    2.76   25.60
  -9   8 -13  273.87  126.72
   9   8 -13  335.71   60.92
  -9  -8 -13  207.05   52.16
  -9   8 -14  198.51   62.54
   9   8 -14  234.29   67.97
  -9  -8 -14  283.34   59.99
  -9   8 -15  296.11   96.90
   9   8 -15  445.38   80.41
  -9  -8 -15  300.94   95.93
  -9   8 -16  398.77  104.45
   9   8 -16  398.35  125.73
  -9  -8 -16  254.08  155.42
  -9   8 -17  190.73  138.61
   9   8 -17  383.34  120.02
  -9  -8 -17   95.99   95.60
  -9   8 -18   35.76   28.08
   9   8 -18   44.82   46.46
   9   9   0   81.91   43.15
  -9   9   0   56.73   24.82
   9   9   1  336.87   86.32
   9  -9  -1  190.68   81.51
  -9   9  -1  233.73   69.00
  -9   9   1  307.97   71.18
   9   9  -1  203.02  105.97
   9   9   2   67.16   27.13
  -9   9  -2   37.75   24.69
   9   9  -2  123.30   76.56
  -9   9   2   67.14   41.87
   9   9   3  109.36   54.70
  -9   9  -3   91.84   28.31
   9   9  -3   48.32   50.76
  -9   9   3   25.62   22.38
  -9   9  -4   82.54   35.43
   9   9  -4  109.07   77.92
  -9   9   4   45.00   19.80
  -9   9  -5  124.31   39.05
   9   9  -5  101.14   56.19
  -9   9   5   21.03   15.19
  -9   9  -6 1475.39  114.31
   9   9  -6 1661.03  214.01
  -9   9   6 1335.18   74.98
  -9   9  -7   47.77   48.14
   9   9  -7  -42.05   30.69
  -9   9   7   -1.25    4.93
  -9   9  -8  329.11  107.89
   9   9  -8  428.80   89.46
  -9   9  -9   40.56   33.56
   9   9  -9   -3.39   28.94
  -9   9 -10  -25.16   39.24
   9   9 -10   47.23   32.40
  -9   9 -11   35.86   31.16
   9   9 -11  140.79   52.94
  -9   9 -12  444.38  147.80
   9   9 -12  327.30  136.40
  -9  -9 -12  643.05   88.35
  -9   9 -13   50.31   34.42
   9   9 -13   92.93   41.56
  -9  -9 -13   44.53   28.43
  -9   9 -14   62.69   38.63
   9   9 -14  194.03   98.44
  -9  -9 -14   79.53   44.79
  -9   9 -15  128.33   67.28
   9   9 -15   49.39   39.13
  -9  -9 -15   34.29   35.53
  -9   9 -16   -6.49   39.22
   9   9 -16   62.32   42.40
  -9   9 -17   11.61   48.41
   9   9 -17   32.83   29.09
  -9  -9 -17   50.03   29.62
   9  10   0   44.74   38.34
  -9  10   0   16.07   15.51
   9  10   1   38.17   25.97
  -9  10  -1   39.10   25.85
   9  10  -1   71.95   47.21
  -9  10   1   28.08   24.19
   9  10   2  118.39   52.00
   9 -10  -2   78.93   31.98
  -9  10  -2  175.33   60.99
  -9  10   2  203.62   54.30
   9  10  -2  241.29   65.79
   9  10   3   47.09   39.43
  -9  10  -3   20.31   30.08
   9  10  -3   88.34   81.64
  -9  10   3    9.70   15.94
   9  10   4   18.13   15.93
  -9  10  -4   26.39   21.06
   9  10  -4  103.36   46.59
  -9  10   4   23.96   17.24
  -9  10  -5   66.08   46.34
   9  10  -5   38.41   37.73
  -9  10  -6   21.89   26.66
   9  10  -6   43.56   24.63
  -9  10   6   19.17   15.91
  -9  10  -7   50.70   38.33
   9  10  -7   56.91   32.01
  -9  10   7   10.28    8.22
  -9  10  -8  127.95   64.27
   9  10  -8  220.36   68.84
  -9  10  -9   23.60   51.15
   9  10  -9  121.02   61.78
  -9  10 -10  338.01  140.72
   9  10 -10  416.55  107.04
  -9  10 -11   46.03   22.46
   9  10 -11  103.55   65.87
  -9  10 -12   38.01   23.00
   9  10 -12   36.98   22.61
  -9  10 -13   34.83   35.10
   9  10 -13  150.99   65.34
  -9 -10 -13   40.23   34.43
  -9  10 -14  173.87   66.83
   9  10 -14  279.43   71.15
  -9 -10 -14  178.90   87.43
  -9  10 -15   89.79   53.11
   9  10 -15  106.91   57.14
  -9 -10 -15   21.89   35.16
  -9  10 -16    9.86   34.82
  -9 -10 -16   72.27   57.89
   9  11   0  752.68  175.50
  -9  11   0  701.12   68.60
   9  11   1  121.63   53.03
  -9  11  -1   61.77   33.68
   9  11  -1   46.95   37.51
  -9  11   1  161.25   47.47
   9  11   2   69.79   29.26
  -9  11  -2   78.47   48.94
   9  11  -2  131.91   54.21
  -9  11   2   43.70   39.64
   9  11   3  200.14   69.65
  -9  11  -3  249.44   86.49
   9  11  -3  276.87   69.40
   9  11   4  333.02  152.08
  -9  11  -4  540.16  147.85
   9  11  -4  504.91  140.57
  -9  11  -5   17.94   28.74
   9  11  -5  107.96   40.17
  -9  11   5    9.89   10.78
  -9  11  -6  328.91  141.35
   9  11  -6  529.90  103.99
  -9  11   6  437.29   82.75
  -9  11  -7  195.31   74.25
   9  11  -7  351.97   95.13
  -9  11  -8  220.91   86.30
   9  11  -8  432.63   97.05
  -9  11  -9   49.26   47.12
   9  11  -9   68.04   41.03
  -9  11 -10   -3.48   35.34
   9  11 -10   70.52   62.63
  -9  11 -11   49.53   41.54
   9  11 -11   24.39   44.57
  -9  11 -12   53.78   25.89
   9  11 -12   84.09   47.86
  -9  11 -13   50.01   40.40
   9  11 -13  130.06   41.80
  -9 -11 -13   51.68   39.45
  -9  11 -14  187.75   77.44
   9  11 -14   96.26   45.45
  -9 -11 -14   28.89   40.27
  -9  11 -15   26.70   46.34
  -9 -11 -15   73.25   59.87
   9  12   0  -10.10   32.54
  -9  12   0   -0.26   26.18
   9  12   1  968.78  281.49
  -9  12  -1  767.33   91.39
   9  12  -1  905.69  122.91
  -9  12   1  922.24   93.19
   9  12   2   74.75   47.01
  -9  12  -2  125.92   45.88
   9  12  -2   95.87   42.69
  -9  12   2   91.78   47.52
   9  12   3  412.16  157.00
  -9  12  -3  646.71   78.31
   9  12  -3  442.64  151.26
  -9  12   3  450.71  121.22
   9  12   4  131.89   60.76
  -9  12  -4  258.32   55.62
   9  12  -4  131.58   68.35
  -9  12   4   93.50   55.20
  -9  12  -5  147.35   63.10
   9  12  -5  203.46   41.52
  -9  12  -6   48.80   47.38
   9  12  -6  298.39   73.62
  -9  12  -7  251.22   90.89
   9  12  -7  425.59  101.78
  -9  12  -8   43.53   47.82
   9  12  -8   22.23   19.45
  -9  12  -9   71.42   47.61
   9  12  -9  119.34   48.78
  -9  12 -10  286.45   74.81
   9  12 -10  243.58   99.74
  -9  12 -11   19.94   43.49
  -9  12 -12  171.17   63.56
   9  12 -12   49.12   19.42
  -9  12 -13  204.62   82.88
   9  12 -13   55.31   51.73
  -9  12 -14  260.24   99.64
   9  12 -14   84.85   42.78
  -9 -12 -14  103.26   44.32
   9  13   0 1018.08  252.35
  -9  13   0  824.44   80.84
   9  13   1   30.54   23.70
  -9  13  -1   53.72   42.19
   9  13  -1   39.39   27.07
   9  13   2  231.70   95.72
  -9  13  -2  311.52   61.25
   9  13  -2  243.80   63.64
  -9  13   2  163.41   79.67
   9  13   3   46.64   38.35
  -9  13  -3   39.42   43.55
   9  13  -3   18.64   29.60
  -9  13   3   10.14   21.49
   9  13   4   26.34   31.08
  -9  13  -4   41.17   34.81
   9  13  -4   -3.48   39.50
  -9  13   4    1.45    8.79
   9  13   5   91.55   63.16
  -9  13  -5   14.05   28.16
   9  13  -5   46.73   32.06
  -9  13  -6   36.52   40.16
   9  13  -6   11.06   34.77
   9  13  -7  -16.91   28.67
  -9  13  -8   52.70   57.33
   9  13  -8   18.64   34.29
  -9  13  -9  136.95   75.33
   9  13  -9   99.18   51.97
  -9  13 -10   57.10   41.49
   9  13 -10   52.32   42.33
   9  13 -11  225.14   83.44
  -9  13 -12  258.78  142.24
   9  13 -12  398.15  191.14
   9  14   0   45.38   39.67
  -9  14   0    9.67   18.86
   9  14   1  472.05  180.46
  -9  14  -1  557.77   79.25
   9  14  -1  464.63  159.98
   9  14   2  364.17  226.94
  -9  14  -2  515.68   93.41
   9  14  -2  634.26  204.86
   9  14   3  208.90  142.33
  -9  14  -3  310.77  111.96
   9  14  -3  330.79  130.62
   9  14   4  255.36  174.52
  -9  14  -4  543.22   71.70
   9  14  -4  611.31  231.92
   9  14   5  869.31  197.08
  -9  14  -5  758.21   82.03
   9  14  -5  470.97  223.10
  -9  14  -6   -5.87   35.13
   9  14  -6   34.93   39.51
  -9  14  -7  645.26   73.45
   9  14  -7  459.90  206.67
  -9  14  -8  153.72   45.11
   9  14  -8  236.58  104.25
  -9  14  -9  664.76   72.14
   9  14  -9  570.75  218.25
  -9  14 -10  353.98  100.52
   9  14 -10  616.33  188.78
   9  15   0   41.17   33.82
  -9  15   0   24.51   32.36
   9  15   1   22.55   53.48
  -9  15  -1   21.41   28.08
   9  15  -1   54.35   39.50
  -9  15   1   15.18   27.15
   9  15   2   34.50   17.64
  -9  15  -2   22.21   34.68
   9  15  -2   -0.02   37.54
   9  15   3   53.16   34.75
  -9  15  -3   31.64   38.64
   9  15  -3   31.44   29.47
   9  15   4   66.44   39.66
  -9  15  -4   86.14   50.36
   9  15  -4   85.34   57.07
  -9  15  -5  120.00   49.34
   9  15  -5   93.79   57.47
  -9  15  -6  317.49  136.81
   9  15  -6  362.34  141.44
  -9  15  -7  -37.54   34.30
   9  15  -7   15.58   23.22
  -9  15  -8  787.00  184.36
   9  15  -8  562.07  206.77
   9  16   0   48.82   36.19
   9  16   1  223.34  196.20
  -9  16  -1  292.40  189.31
   9  16  -1  449.11  267.24
   9  16   2  129.73   39.37
  -9  16  -2   37.68   28.95
   9  16  -2  118.79   41.21
   9  16   3  318.26  192.38
  -9  16  -3  132.25  115.18
   9  16  -3  354.38  162.53
   9  16   4   63.44   40.84
  -9  16  -4  219.47   75.27
   9  16  -4  137.03   69.21
 -10   0   1   16.36   13.53
 -10   0   215555.11  701.26
 -10   0  -214794.11  671.82
 -10   0   3    6.37   11.85
 -10   0  -3   15.20   30.66
 -10   0   4 1160.75   87.85
 -10   0  -4 1262.98   99.45
 -10   0   5    9.43   14.03
 -10   0  -5   33.62   14.57
 -10   0   6  266.01   90.77
 -10   0  -6  422.89   93.23
 -10   0   7   56.40   29.45
 -10   0  -7   25.92   33.91
 -10   0   8 2039.42  124.16
 -10   0  -8 2327.09  147.59
 -10   0  -9   27.29   22.87
 -10   0  10 1927.79   93.53
 -10   0 -10 1616.75  145.32
  10   0 -11    2.15    9.49
 -10   0  11   18.23   13.81
 -10   0 -11   38.73   44.15
  10   0 -12 2293.31  130.63
 -10   0  12 2125.78  127.90
 -10   0 -12 1953.88  150.06
  10   0 -13   -7.14   16.01
 -10   0 -13   36.62   41.91
  10   0 -14 3718.24   92.96
 -10   0 -14 3589.40  294.30
  10   0 -15   19.60   14.74
 -10   0 -15   23.13   23.83
  10   0 -16  784.06   59.07
 -10   0 -16  848.52  125.08
 -10   0 -17   -6.52   36.47
 -10   0 -18   26.13   38.15
 -10   0 -19   90.68   48.42
 -10   0 -20   60.58   73.47
 -10   1   0  439.22   86.83
 -10   1  -1   17.18   28.16
 -10   1  -1    8.69   17.89
 -10  -1   1   16.14   20.77
 -10   1   1   28.79   22.93
 -10  -1   2 2172.28  128.00
 -10   1  -2 2774.32  189.92
 -10   1   2 2467.84  133.90
 -10  -1   3  141.20   38.73
 -10   1  -3  119.10   36.21
 -10   1   3  132.74   33.97
 -10  -1   4 1814.81  143.59
 -10   1  -4 1731.07  126.06
 -10   1   4 1948.52  121.66
 -10  -1  -4 2037.89  159.86
 -10  -1   5   22.62   16.84
 -10   1  -5    6.48   19.67
 -10  -1  -5   26.86   27.40
 -10  -1   6  475.17   81.90
 -10   1  -6  500.04  102.06
 -10  -1  -6  350.38  209.36
 -10   1  -7   -2.31   30.84
 -10  -1   7   47.13   35.05
 -10  -1  -7   50.27   34.37
 -10   1   7   27.31   17.90
 -10   1  -8  173.66   49.88
 -10  -1   8  169.42   37.16
 -10   1   8   79.00   29.27
  10   1  -8  190.30   51.89
 -10  -1   9  104.23   33.94
 -10   1  -9   83.10   37.46
  10   1  -9   43.53   34.21
 -10  -1  -9   98.24   52.83
 -10   1 -10 2313.93  222.22
  10   1 -10 2421.67  120.05
 -10   1  10 2222.85  100.44
 -10  -1 -10 2246.04  126.71
 -10   1 -11  -32.75   42.72
  10   1 -11   82.53   32.55
 -10   1  11   24.26   18.18
 -10  -1 -11  212.02   61.37
 -10   1 -12  268.65  118.07
 -10   1  12  140.22   51.98
 -10  -1 -12  514.45  187.36
  10   1 -12  340.47   73.78
 -10   1 -13  111.47   46.73
  10   1 -13  125.40   52.37
 -10  -1 -13  102.46   45.91
 -10   1 -14  109.71   41.24
  10   1 -14  140.03   70.92
 -10  -1 -14  132.57   62.63
 -10   1 -15   48.00   42.16
 -10  -1 -15   79.77   81.97
 -10   1 -16  204.91  102.60
 -10  -1 -16   97.81   70.95
 -10   1 -17    6.60   37.51
 -10  -1 -17   24.29   25.25
 -10   1 -18  174.82   56.29
 -10  -1 -18   67.48   43.66
 -10   1 -19  -43.64   39.89
 -10  -1 -19    2.61   23.34
 -10   2   0  764.10  106.81
 -10   2   0  732.92   46.64
 -10   2  -1  265.66   64.71
 -10   2   1  115.33   55.72
 -10   2   1  223.79   61.00
 -10   2  -2 1415.29  146.71
 -10   2   2 1664.15  111.81
 -10   2   2 1765.18  118.49
 -10   2  -3  110.72   38.93
 -10   2   3  138.95   35.29
 -10   2   3  169.39   46.36
 -10   2  -4 3827.72  244.35
 -10   2   4 4139.77  238.59
 -10   2  -5   73.61   48.94
 -10  -2   5   10.37   21.90
 -10   2   5    8.67   11.07
  10   2  -5   19.92   12.63
 -10   2  -6 3725.10  166.56
  10   2  -6 3903.77  138.11
 -10   2   6 3683.73  133.93
 -10  -2  -6 4062.37  153.16
 -10   2  -7   34.56   24.45
  10   2  -7    1.61   20.45
 -10  -2  -7   86.31   44.08
 -10   2  -8 3752.21  219.64
  10   2  -8 3635.68  209.59
 -10   2   8 3683.91  199.11
 -10  -2  -8 3484.86  247.74
 -10   2  -9   -7.08   34.00
  10   2  -9   84.58   29.52
 -10   2   9   72.86   23.23
 -10  -2  -9  124.95   49.24
 -10   2 -10 1042.33  107.65
  10   2 -10 1039.67  171.23
 -10   2  10  902.23   51.61
 -10  -2 -10  975.39  146.77
 -10   2 -11  287.09   78.64
  10   2 -11  245.62   55.77
 -10  -2 -11  141.69   41.34
 -10   2 -12   82.09   62.65
  10   2 -12   32.30   19.70
 -10  -2 -12   96.18   43.86
 -10   2 -13   -9.21   32.80
 -10  -2 -13   24.30   35.83
 -10   2 -14  484.22  177.63
  10   2 -14  432.69  164.46
 -10  -2 -14  678.11  110.71
 -10   2 -15  123.64   59.59
  10   2 -15   43.92   38.81
 -10  -2 -15   38.44   31.63
 -10   2 -16  939.04  186.31
  10   2 -16  872.31   70.21
 -10  -2 -16  711.56  117.60
 -10   2 -17   88.97   39.06
 -10  -2 -17   57.60   57.85
 -10   2 -18  393.58  116.32
 -10  -2 -18  240.81  145.31
 -10   2 -19   53.01   28.67
 -10  -2 -19   16.41   40.00
 -10   3   0   14.54   13.59
 -10   3  -1  493.87  109.98
 -10   3   1  314.22   88.97
 -10   3   1  471.34  140.67
 -10   3  -2   42.78   33.98
 -10   3   2   16.77   20.83
 -10   3   2   14.87   25.94
 -10   3  -3  110.44   28.25
 -10   3   3  116.24   37.68
 -10   3   3  118.85   31.76
 -10   3  -4   22.70   30.40
 -10   3   4   20.42   17.61
  10   3  -4   44.98   22.69
 -10   3   4   39.73   26.38
 -10   3  -5  358.97   90.76
  10   3  -5  227.32   71.90
 -10   3   5  212.27   53.36
 -10   3   5  239.79   76.40
 -10   3  -6   85.03   57.61
  10   3  -6  145.73   29.26
 -10   3   6   83.41   31.23
 -10   3  -7  427.21  156.19
  10   3  -7  472.72  138.11
 -10   3   7  395.40   87.44
 -10   3   7  415.15   75.77
 -10  -3  -7  496.20  102.40
 -10   3  -8  478.10  114.96
  10   3  -8  468.41   91.00
 -10   3   8  437.62   81.53
 -10  -3  -8  585.82  149.05
 -10   3  -9   29.96   36.37
  10   3  -9   -0.01   21.76
 -10   3   9   48.44   24.73
 -10  -3  -9   80.31   54.68
 -10   3   9   38.32   25.11
 -10   3 -10  234.15   75.02
  10   3 -10  272.10   66.30
 -10   3  10  123.59   49.62
 -10  -3 -10  285.93   69.80
 -10   3  10  101.57   44.49
 -10   3 -11  182.64   41.98
  10   3 -11  194.32   61.06
 -10   3  11  139.68   45.20
 -10  -3 -11  164.19   87.51
 -10   3  11  126.26   45.66
 -10   3 -12   61.32   51.47
  10   3 -12    4.84   30.24
 -10  -3 -12  191.09   66.41
 -10   3  12   29.45   15.49
 -10   3 -13  121.39   39.45
  10   3 -13   33.21   22.12
 -10  -3 -13  115.63   54.35
 -10   3  13  109.41   29.30
 -10   3 -14  275.93   60.64
  10   3 -14  257.82   78.46
 -10  -3 -14  243.63   71.67
 -10   3 -15  350.84   81.74
  10   3 -15  327.02   83.35
 -10  -3 -15  305.48  136.19
 -10   3 -16  153.49   60.11
  10   3 -16  150.68   49.66
 -10  -3 -16   93.66   53.66
 -10   3 -17   33.73   47.73
 -10  -3 -17   16.00   24.05
 -10   3 -18   31.47   38.40
 -10  -3 -18   47.78   28.27
 -10   3 -19   68.15   32.23
 -10  -3 -19   28.36   36.65
 -10   4   0 4222.71  248.33
 -10   4  -1  162.63   41.63
 -10   4   1  183.08   45.23
 -10   4  -2 3458.96  211.70
  10   4  -2 3233.00  199.31
 -10   4   2 3249.50  197.39
 -10   4  -3  173.09   48.05
  10   4  -3  158.63   36.03
 -10   4   3  219.72   66.24
 -10   4  -4   27.89   21.41
 -10   4   4   18.86    9.29
  10   4  -4   21.42   18.56
 -10   4   4   -1.27   18.91
 -10   4  -5   39.37   22.25
  10   4  -5  111.46   28.07
 -10   4   5  103.32   35.43
 -10   4  -6  103.56   53.63
  10   4  -6  177.68   57.16
 -10   4   6  146.66   47.28
 -10   4   6  195.90   48.93
 -10   4  -7  187.10   62.27
  10   4  -7  159.25   38.77
 -10   4   7   82.16   28.42
 -10   4   7   88.31   27.80
 -10   4  -8  262.11   61.85
  10   4  -8  192.23   64.87
 -10   4   8  164.00   58.85
 -10  -4  -8  333.34   64.11
 -10   4  -9  511.75  184.60
 -10   4   9  638.79   41.48
 -10   4   9  600.47   40.10
 -10  -4  -9  574.55   89.69
 -10   4 -10  221.41   97.37
  10   4 -10  254.04   66.58
 -10   4  10  105.39   42.41
 -10  -4 -10  161.78   61.57
 -10   4  10  224.23   41.16
 -10   4 -11  296.46  116.58
  10   4 -11  354.40   69.73
 -10  -4 -11  363.75  110.49
 -10   4  11  247.81   57.68
 -10   4 -12  885.79   96.90
  10   4 -12  827.74  200.90
 -10  -4 -12  732.20   91.95
 -10   4 -13   54.39   20.23
  10   4 -13   -2.67   24.43
 -10  -4 -13  -16.71   32.20
 -10   4 -14  819.94  203.22
  10   4 -14  888.31  170.25
 -10  -4 -14  753.70  164.74
 -10   4 -15   45.53   31.67
  10   4 -15   76.20   40.50
 -10  -4 -15   21.42   25.56
 -10   4 -16  130.91   75.02
 -10  -4 -16   64.91   57.45
 -10   4 -17   56.75   35.04
  10   4 -17   75.17   41.10
 -10  -4 -17   46.07   29.16
 -10   4 -18   68.77   37.48
  10   4 -18   62.73   28.08
 -10  -4 -18   54.66   26.93
 -10   4 -19  124.16   48.38
 -10  -4 -19    1.76   40.41
 -10   5   0   25.63   30.16
 -10   5  -1  240.80   81.86
  10   5  -1  145.38   43.07
 -10   5   1  212.29   51.93
 -10   5  -2 2535.89  112.98
  10   5  -2 2547.09  185.35
 -10   5   2 2654.08  109.39
 -10   5  -3   36.37   26.59
 -10   5   3   21.71   15.17
 -10   5  -4  412.83  100.11
  10   5  -4  429.00   92.59
 -10   5   4  283.81   87.41
 -10   5   4  223.58   71.86
 -10   5  -5    7.23   33.04
 -10   5   5   23.51   10.46
 -10   5   5   -3.37   19.36
  10   5  -5   27.34   18.86
 -10   5  -6   85.29   38.68
  10   5  -6   64.04   24.14
 -10   5   6   58.65   19.50
 -10   5  -7   36.81   30.19
  10   5  -7   36.22   36.09
 -10   5   7   -2.28   12.36
 -10   5   7   34.80   15.69
 -10   5  -8   37.92   33.02
  10   5  -8   37.18   25.33
 -10   5   8   39.95   20.58
 -10   5   8   42.28   25.03
 -10   5  -9   86.01   55.86
  10   5  -9   64.14   34.43
 -10   5   9    9.62   10.37
 -10   5   9   26.03   15.68
 -10  -5  -9    6.26   32.80
 -10   5 -10  330.39  111.83
  10   5 -10  333.57   63.83
 -10   5  10  194.48   28.97
 -10  -5 -10  236.46   73.27
 -10   5 -11    4.28   36.76
  10   5 -11    5.58   29.00
 -10  -5 -11   21.84   37.21
 -10   5 -12  169.56   70.03
  10   5 -12  290.17   49.19
 -10  -5 -12  319.52   81.38
 -10   5 -13   59.67   46.37
  10   5 -13   64.02   44.50
 -10  -5 -13   34.59   40.83
 -10   5 -14  331.74  153.14
  10   5 -14  443.27   98.68
 -10  -5 -14  330.16  170.36
 -10   5 -15   57.11   51.39
  10   5 -15   33.80   21.13
 -10  -5 -15   31.76   33.25
 -10   5 -16  485.76  218.58
  10   5 -16  517.38  150.50
 -10  -5 -16  430.61  239.86
 -10   5 -17    8.29   42.64
  10   5 -17   16.93   17.73
 -10  -5 -17   57.74   34.54
 -10   5 -18  180.06  109.84
  10   5 -18  275.52   99.14
 -10  -5 -18  186.81   78.64
  10   6   0 2062.71  102.64
 -10   6   0 2138.57  149.73
 -10   6  -1   81.00   36.50
  10   6  -1  119.17   41.98
 -10   6   1   62.25   34.44
 -10   6  -2 1105.33   90.23
  10   6  -2 1010.86   85.38
 -10   6   2 1027.29   81.80
 -10   6  -3  313.82   93.80
  10   6  -3  429.86  125.75
 -10   6   3  274.66   84.68
 -10   6  -4   37.11   32.96
  10   6  -4   53.07   19.08
 -10   6   4    4.26   25.31
 -10   6  -5  172.18   73.45
  10   6  -5   97.24   48.73
 -10   6   5   21.18   15.71
 -10   6   5   20.51    9.06
 -10   6  -6  242.26   53.66
  10   6  -6  360.63  100.25
 -10   6   6  355.29   85.15
 -10   6  -7   63.14   26.79
 -10   6   7   24.69   12.88
 -10   6   7    9.76    9.80
  10   6  -7  125.19   57.92
 -10   6  -8  171.40   49.66
 -10   6   8   84.73   24.89
 -10   6   8   61.27   25.27
  10   6  -8  129.11   52.85
 -10   6  -9  108.58   48.08
  10   6  -9   47.76   35.65
 -10   6   9   26.72   15.51
 -10   6 -10  307.25   62.84
  10   6 -10  404.20   95.63
 -10  -6 -10  411.85   64.79
 -10   6 -11   49.87   38.80
  10   6 -11   19.40   37.77
 -10  -6 -11   44.03   28.46
 -10   6 -12  619.90  217.53
  10   6 -12  994.37  171.74
 -10  -6 -12  763.59  266.60
 -10   6 -13   -2.67   39.08
 -10  -6 -13   24.87   23.93
 -10   6 -14  468.76  180.93
  10   6 -14  466.31  105.21
 -10  -6 -14  265.23  111.51
 -10   6 -15   42.86   44.93
  10   6 -15   54.89   34.68
 -10  -6 -15   32.33   29.55
 -10   6 -16   38.71   47.67
  10   6 -16   -0.05   26.64
 -10  -6 -16   11.37   29.56
 -10   6 -17   89.65   53.19
 -10  -6 -17   50.52   33.27
 -10   6 -18  123.96   63.50
  10   6 -18   20.55   33.28
  10   7   0   71.44   49.49
 -10   7   0   26.68   16.80
  10   7   1  241.91   72.13
 -10   7  -1  367.56  121.65
  10   7  -1  328.79  121.67
 -10   7   1  230.91   75.83
 -10   7  -2  117.00   42.57
  10   7  -2  172.39   75.68
 -10   7   2   98.82   37.21
 -10   7  -3  211.74   44.56
  10   7  -3  305.66   98.07
 -10   7   3  259.14   79.13
 -10   7  -4  230.44   70.17
  10   7  -4  204.41   67.33
 -10   7   4  129.31   46.18
 -10   7  -5   94.79   45.39
  10   7  -5  125.03   62.98
 -10   7   5   55.21   23.45
 -10   7   5   81.44   34.38
 -10   7  -6   14.60   34.26
 -10   7   6   -1.71    8.87
  10   7  -6   -7.67   32.83
 -10   7   6   27.10   19.93
 -10   7  -7   62.63   45.11
  10   7  -7   69.46   36.51
 -10   7   7   14.08   16.52
 -10   7   7   21.02   13.08
 -10   7  -8  588.89  109.35
  10   7  -8  635.06  197.67
 -10   7   8  631.46   39.82
 -10   7  -9   54.99   39.57
  10   7  -9   67.72   42.55
 -10   7 -10  493.05  211.16
  10   7 -10  631.35  121.36
 -10   7 -11   25.97   21.34
  10   7 -11   74.67   29.75
 -10  -7 -11    6.61   17.99
 -10   7 -12   42.95   40.58
  10   7 -12  208.39   50.14
 -10  -7 -12  116.59   60.23
 -10   7 -13   63.11   52.75
  10   7 -13   55.80   44.42
 -10  -7 -13   40.35   29.16
 -10   7 -14   82.15   39.47
  10   7 -14  127.45   43.29
 -10  -7 -14   33.65   43.29
 -10   7 -15  114.85   78.00
  10   7 -15  101.09   42.71
 -10  -7 -15   43.36   20.61
 -10   7 -16  107.62   58.40
  10   7 -16  189.54   53.70
 -10  -7 -16   88.11   50.75
 -10   7 -17   69.54   60.52
  10   7 -17  122.45   39.36
 -10  -7 -17   50.68   40.71
  10   8   0   -3.69   34.52
 -10   8   0   35.00   25.08
  10   8   1   41.15   35.98
 -10   8  -1   30.01   27.58
  10   8  -1   -9.43   35.39
 -10   8   1    2.55   17.55
  10   8   2  736.61  235.45
 -10   8  -2  818.66  187.00
  10   8  -2  800.75  137.23
 -10   8   2  814.62   76.75
 -10   8  -3   58.16   38.61
  10   8  -3   37.12   22.03
 -10   8   3   25.66   16.59
 -10   8  -4 1307.72  110.15
  10   8  -4 1167.06  186.94
 -10   8   4 1148.15   91.56
 -10   8  -5   62.69   32.84
  10   8  -5   60.06   41.93
 -10   8   5   -3.55   12.73
 -10   8  -6 2599.39  164.23
  10   8  -6 2640.38  166.91
 -10   8   6 2654.92  134.54
 -10   8  -7   37.14   39.48
  10   8  -7   69.24   45.52
 -10   8   7   18.48   10.12
 -10   8  -8 1768.23  135.37
  10   8  -8 1528.45  215.94
 -10   8   8 1645.83   98.76
 -10   8  -9   49.45   31.64
  10   8  -9   71.59   44.64
 -10   8 -10  416.54   63.73
  10   8 -10  540.64  103.72
 -10   8 -11   -9.81   43.87
  10   8 -11    9.41   26.90
 -10   8 -12  123.06   64.58
  10   8 -12  252.27   70.96
 -10  -8 -12  142.34   70.47
 -10   8 -13   78.61   47.90
  10   8 -13   85.62   50.85
 -10  -8 -13   62.26   32.58
 -10   8 -14  144.57   77.36
  10   8 -14  154.64   84.35
 -10  -8 -14  180.65   48.62
 -10   8 -15   72.98   37.83
  10   8 -15  113.19   95.11
 -10  -8 -15   24.26   50.45
 -10   8 -16  309.55  146.43
  10   8 -16  362.00   69.54
 -10  -8 -16  238.09  110.27
 -10   8 -17   59.85   33.23
  10   8 -17   97.11   46.79
 -10  -8 -17   35.05   36.08
  10   9   0   -4.90   22.46
 -10   9   0   40.15   24.35
  10   9   1   23.03   32.19
 -10   9  -1   82.52   44.06
  10   9  -1   81.48   33.28
 -10   9   1   47.41   21.85
  10   9   2  391.50   87.89
 -10   9  -2  356.74  121.80
  10   9  -2  474.10  117.23
 -10   9   2  345.48  113.89
 -10   9  -3   69.39   38.29
  10   9  -3   84.19   68.78
 -10   9   3   99.19   35.33
 -10   9  -4  104.05   53.50
  10   9  -4  262.80  104.35
 -10   9   4   97.57   34.17
 -10   9  -5   23.16   54.26
  10   9  -5  115.17   38.53
 -10   9   5   73.35   37.42
 -10   9  -6   32.67   40.06
  10   9  -6   73.90   37.93
 -10   9   6   25.20   12.97
 -10   9  -7   72.95   49.83
  10   9  -7  110.44   42.45
 -10   9   7    2.19   10.29
 -10   9  -8  115.08   53.49
  10   9  -8  113.53   34.77
 -10   9  -9   49.51   28.69
  10   9  -9   87.87   34.48
 -10   9 -10  442.68  118.13
  10   9 -10  391.42  101.71
 -10   9 -11   99.43   55.45
  10   9 -11   69.29   64.32
 -10   9 -12   93.29   45.60
  10   9 -12   74.60   36.13
 -10  -9 -12   52.78   38.44
 -10   9 -13   54.60   45.69
  10   9 -13   35.31   44.44
 -10  -9 -13    2.63   19.46
 -10   9 -14   73.53   42.42
  10   9 -14  121.93   42.90
 -10  -9 -14   88.28   59.07
 -10   9 -15    9.02   28.72
  10   9 -15   26.68   36.94
 -10  -9 -15   51.25   28.52
 -10   9 -16  193.83  103.64
  10   9 -16  270.58  105.83
  10  10   0 5960.74  154.79
 -10  10   0 5860.99  158.34
  10  10   1   66.53   33.98
 -10  10  -1   45.58   32.61
  10  10  -1   44.43   18.82
 -10  10   1   45.87   26.03
  10  10   2 2111.12  166.50
 -10  10  -2 2368.81  161.85
  10  10  -2 2214.04  164.18
 -10  10   2 2617.53  174.25
  10  10   3  100.66   52.98
 -10  10  -3  196.15   88.95
  10  10  -3  117.19   59.49
 -10  10   3  108.69   44.27
 -10  10  -4  646.77  232.01
  10  10  -4  762.45  200.22
 -10  10   4  473.38  162.35
 -10  10  -5   69.44   40.63
  10  10  -5   34.68   19.26
 -10  10   5   44.37   26.98
 -10  10  -6 1050.13  249.63
  10  10  -6 1313.98  284.62
 -10  10  -7  160.76   81.86
  10  10  -7  160.89   56.54
 -10  10  -8  652.68  271.36
  10  10  -8  726.47  139.46
 -10  10  -9   74.83   44.67
  10  10  -9   68.59   38.69
 -10  10 -10  945.85  243.63
  10  10 -10 1101.65   92.41
 -10  10 -11   28.87   41.35
  10  10 -11   69.00   61.53
 -10  10 -12 1376.67  432.52
  10  10 -12 1356.05  187.96
 -10  10 -13   59.70   48.63
  10  10 -13   86.37   38.45
 -10 -10 -13   55.15   23.77
 -10  10 -14 1179.37  173.80
  10  10 -14  899.30  203.05
 -10 -10 -14 1235.99   93.88
 -10  10 -15   62.22   56.19
  10  10 -15    4.10   28.14
 -10 -10 -15   12.07   43.51
  10  11   0   41.92   36.08
 -10  11   0   50.45   22.94
 -10  11  -1  111.07   41.23
  10  11   1   99.54   55.12
 -10  11   1   95.32   38.97
  10  11  -1   59.14   38.34
  10  11   2  544.05  113.03
 -10  11  -2  437.56  177.91
  10  11  -2  594.76  162.57
 -10  11   2  451.24   45.96
 -10  11  -3   42.27   34.91
  10  11   3   80.44   38.19
 -10  11   3   74.47   43.22
  10  11  -3   27.00   25.63
 -10  11  -4 1680.85  138.74
  10  11  -4 1877.75  164.58
 -10  11   4 1685.63  131.89
 -10  11  -5   -3.47   35.60
  10  11  -5   27.16   42.35
 -10  11   5   15.27   15.64
 -10  11  -6  241.47  162.68
  10  11  -6  377.27   84.41
 -10  11  -7   24.33   24.37
  10  11  -7   68.03   42.42
 -10  11  -8  229.42   97.10
  10  11  -8  330.50   97.91
 -10  11  -9   41.70   22.20
  10  11  -9   26.87   41.03
[truncated: 76,276 more chars]
